# Supplementary material for: On-DNA hydroalkylation of N-vinyl heterocycles via photoinduced EDA-complex activation
Source: Royal Society of Chemistry journal article supplement (doi:10.1039/d3sc03731b), 2023-01-01
Supplement: d3sc03731b1.pdf [file d3sc03731b1.pdf]

## Supporting Information

### On-DNA Hydroalkylation of *N*-Vinyl Heterocycles via Photoinduced EDA-Complex Activation

Mohammed Sharique,<sup>‡a</sup> Bianca Matsuo,<sup>‡a</sup> Albert Granados,<sup>‡a</sup> Saegun Kim,<sup>a</sup> Mahwish Arshad,<sup>a</sup> Hyunjung Oh,<sup>a</sup> Victoria E. Wu,<sup>b</sup> Minxue Huang,<sup>b</sup> Adam Csakai,<sup>b</sup> Lisa A. Marcaurelle,<sup>b</sup> and Gary A. Molander<sup>a\*</sup>

<sup>a</sup> Roy and Diana Vagelos Laboratories, Department of Chemistry, University of Pennsylvania, 231 South 34th Street, Philadelphia, Pennsylvania 19104-6323, United States

<sup>b</sup> Encoded Library Technologies/NCE Molecular Discovery, R&D Medicinal Science and Technology, GlaxoSmithKline, 200 Cambridge Park Drive, Cambridge, MA 02140, United States

\*To whom correspondence should be addressed. E-mail: [gmolandr@sas.upenn.edu](mailto:gmolandr@sas.upenn.edu)

<sup>‡</sup>These authors contributed equally

## Table of Contents

|                                                                                                                |     |
|----------------------------------------------------------------------------------------------------------------|-----|
| 1. <b>General Considerations</b> .....                                                                         | 3   |
| 1.1 General.....                                                                                               | 3   |
| 1.2 Materials for On-DNA Synthesis .....                                                                       | 3   |
| 1.3 On-DNA Photoreactions.....                                                                                 | 4   |
| 1.4 Analysis of "On-DNA" Reactions .....                                                                       | 4   |
| 2. <b>Synthetic Protocols</b> .....                                                                            | 6   |
| 2.1 Preparation of the DNA-tagged Olefin Headpieces ( <b>HP-1a</b> to <b>HP-1g</b> ).....                      | 6   |
| 2.1.1 General Procedure I (GP-I): Acylation of DNA-HP-NH <sub>2</sub> .....                                    | 6   |
| 2.2 Synthesis of Small Molecules ( <i>N</i> -heterocyclic carboxylic acids <b>1a-1g</b> ) .....                | 10  |
| 2.2.1 General Procedure II (GP-II): Preparation and Characterization of <i>N</i> -Vinylated Heterocycles ..... | 10  |
| 3. <b>General Procedure III (GP-III): Hydroalkylation of N-Vinyl Heterocycles</b> .....                        | 17  |
| 4. <b>Control Experiment</b> .....                                                                             | 18  |
| 5. <b>DNA Damage Assessment</b> .....                                                                          | 19  |
| 6. <b>NMR Spectra: Small Molecules</b> .....                                                                   | 24  |
| 7. <b>UPLC/MS Spectra</b> .....                                                                                | 35  |
| 7.1 Functionalized DNA Headpieces .....                                                                        | 35  |
| 7.2 Hydroalkylated Compounds on-DNA .....                                                                      | 45  |
| 8. <b>References</b> .....                                                                                     | 109 |

# 1 General Considerations

## 1.1 General

All reagents were purchased and used as received from their respective suppliers unless otherwise noted. The synthesis of new compounds used in the study are described in the appropriate sections in this Supporting Information. The reactions were monitored by  $^1\text{H}$  NMR or TLC using silica gel F254 plates (60 Å porosity, 250  $\mu\text{m}$  thickness). TLC analysis was performed using EtOAc/hexanes and  $\text{CH}_2\text{Cl}_2/\text{MeOH}$ , and visualized using permanganate stain, ceric ammonium molybdate (Hanessian's) stain, and/or UV light. Flash chromatography was accomplished using an automated system (monitoring at 254 nm and 280 nm in conjunction with an evaporative light scattering detector) with silica cartridges (60 Å porosity, 20-40  $\mu\text{m}$ ). Accurate mass measurement analyses were conducted using electrospray ionization (ESI). The signals were mass-measured against an internal lock mass reference of leucine enkephalin for ESI-LCMS. The utilized software calibrates the instruments and reports measurements by use of neutral atomic masses. The mass of the electron is not included. IR spectra were recorded using either neat oil or solid products. Data are presented as follows: wavenumber ( $\text{cm}^{-1}$ ) peak shape/intensity (w = weak, m = medium, s = strong, vs = very strong, br = broad). Melting points ( $^\circ\text{C}$ ) are uncorrected.  $^1\text{H}$  NMR (600 MHz) chemical shifts are referenced to residual, non-deuterated  $\text{CHCl}_3$  ( $\delta$  7.26),  $\text{CH}_3\text{CN}$  ( $\delta$  1.94), or  $(\text{CH}_3)_2\text{SO}$  ( $\delta$  2.50).  $^{13}\text{C}$  ( $^1\text{H}$  decoupled) NMR (151 MHz) chemical shifts are reported relative to  $\text{CDCl}_3$  ( $\delta$  77.2),  $\text{CD}_3\text{CN}$  ( $\delta$  1.3, 118.3), or  $(\text{CD}_3)_2\text{SO}$  ( $\delta$  39.5). Data are presented as follows: chemical shift (ppm), multiplicity (s = singlet, d = doublet, t = triplet, q = quartet, m = multiplet, br = broad, dd = doublet of doublets, td = triplet of doublets, dt = doublet of triplets), coupling constant  $J$  (Hz), and integration.

## 1.2 Materials for On-DNA Synthesis

The DNA headpiece (DNA-HP-NH<sub>2</sub>) with PEG4 linker (5'-/Phos/GAGTCA/iSp9-PEG/iAm C7\_CO-PEG4-NH2/iSp9-PEG/TGACTCCC-3') was obtained from Biosearch Technologies, Novato, CA. The spacer-elongated AOP-Headpiece (**Figure S1**) was prepared via HATU coupling following the general procedure described later in this document. After the reaction was deemed complete by LC/MS analysis, the reaction was precipitated following an EtOH precipitation protocol, and the product on-DNA is typically pure enough to be used without further purification.

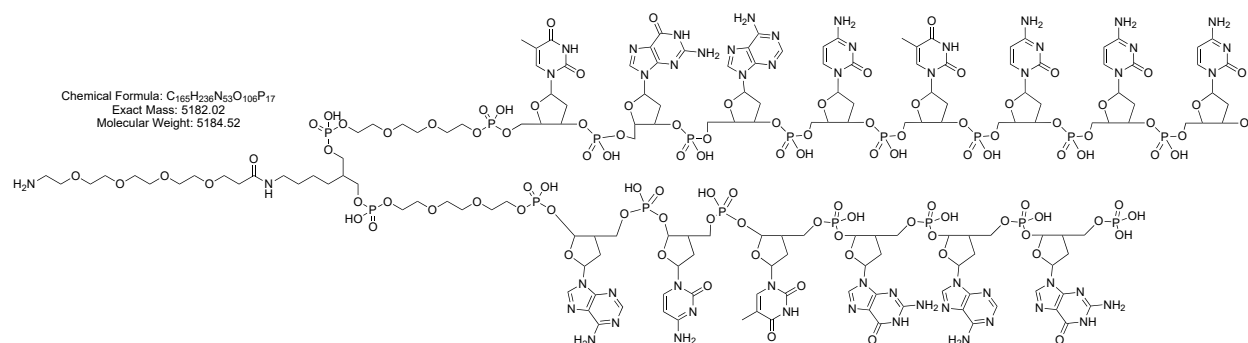

**Figure S1.** Molecular structure of the DNA-HP-NH<sub>2</sub> employed in this study.

### 1.3 On-DNA Photoreactions

For the visible light-mediated photoreactions, one Kessil H150 456 nm lamp (19 V DC 40 W Max) was placed 1.5 inches away from PCR tubes with the light intensity set to 100%. The photoreactions on-DNA were performed in Eppendorf PCR 8-strip microcentrifuge tubes (Fisher Ref. 781320) with PCR strips of 8 caps (Fisher Ref. 781340). HyPure™ Molecular Biology Grade water was purchased and used as received without further manipulation. Reaction mixtures were vortexed with a Fisherbrand™ Mini Vortex Mixer.

### 1.4 Analysis of “on-DNA” reactions

Analysis of on-DNA reactions was performed by LC/MS. After reaction completion, an aliquot of the reaction mixture was diluted with H<sub>2</sub>O to approximately 0.2 mM. At this point, 3 μL aliquots of the LC/MS sample was injected onto reverse-phase chromatography columns (for analysis performed at GSK: Halo 400 Å, ES-C18, 3.4 μ, 2.1 x 30 mm; for analysis performed at UPenn: Cortecs T3 2.7 μm, 2.1x30 mm, Waters) and eluted (10-90% B over 4 min at 0.5 mL/min flow rate; Solvent A: 0.75% v/v/ HFIP / 0.038% TEA / 5 μM EDTA in H<sub>2</sub>O; Solvent B: 0.75% HFIP, 0.038% TEA, 5 μM EDTA in 90/10 MeOH/deionized H<sub>2</sub>O) with monitoring at UV 254 nm (UPenn) and UV-Multiple Wavelength Detector = 260 and 280 nm (GSK). Effluent was analyzed on a Waters SQ Detector 2 ACQUITY UPLC System in negative ion mode (UPenn) or a Bruker qTOF negative ion mode: Scan 600-3000 amu (GSK). For the functionalized headpiece samples (on-DNA), % conversion was determined based on reported peak intensities following deconvolution (between 3,000-10,000 Da) of the DNA charge states using Intact Mass™ by

Protein Metrics Inc. (v4.5-53x64 intact). For the photoredox scope reactions, % conversion was determined using Intact Mass<sup>TM</sup> by Protein Metrics Inc. (v4.5-53x64 intact) (GSK) or using MassLynx at UPenn. Data was scanned between 0.3-2.2 min and deconvoluted between 4,000-6,000 Da, with a mass tolerance window of 2 Da, with 5% of base peak threshold was set for reporting (GSK). Alternatively, data was scanned between 1.0- 5.0 min and deconvoluted between 3,000-8,000 Da, with a mass tolerance window of 2-4 Da, with 10% of base peak threshold was set for reporting (UPenn). Na, K, NH<sub>4</sub>, and HFIP adducts were included in the product percentage. Detailed parameters can be found later in the Supporting Information

An ethanol precipitation protocol was employed upon reaction completion for the evaluation of the scope of the transformation (described in the following sections of this supporting information). The samples were then submitted to centrifugation using a Corning<sup>TM</sup> Mini Microcentrifuge (max. speed: 6,000 rpm). The samples for LC-MS analysis were prepared in HyPure<sup>TM</sup> Molecular Biology Grade H<sub>2</sub>O at approximately 0.2 mM. At this point, the samples were injected onto reverse-phase chromatography columns (for analysis performed at GSK: Halo ES-C18, 2 μm particle size, 160A pore size, 2.1x30 mm; for analysis performed at UPenn: Cortecs T3 2.7 μm, 2.1x30 mm, Waters) and eluted (10-90% B over 4 min at 0.5 mL/min flow rate; Solvent A: 0.75% v/v/ HFIP/0.038% TEA/5 μM EDTA in H<sub>2</sub>O; Solvent B: 0.75% HFIP, 0.038% TEA, 5 μM EDTA in 90/10 MeOH/deionized H<sub>2</sub>O) with monitoring at UV 260 nm (GSK) and UV 254 nm (UPenn). Effluent was analyzed on a Bruker microTOF in negative ion mode (GSK) or Waters SQ Detector 2 ACQUITY UPLC System in negative ion mode (UPenn). For the functionalized headpiece samples (the on-DNA aryl halides/alkenes), % conversion was determined based on reported peak intensities following deconvolution (between 3,000-10,000 Da) of the DNA charge states using the Bruker Compass DataAnalysis software version 4.2 (build 383.1). An intensity of 5% or 10% of the maximum peak intensity observed for a given spectra was set as the reporting threshold. The maximum intensity peak for each distribution of peaks was manually selected as the representative peak for reporting. % Conversion was then calculated by dividing the peak intensity of the product peak by the sum of the reported peaks for the spectra. For the photoredox scope reactions, % conversion was determined using Intact Mass<sup>TM</sup> by Protein Metrics Inc. (version v3.3-421 x 64) (GSK). For the photoredox scope reactions, % conversion was determined using MassLynx at UPenn. Data was scanned between 1.9-3.0 min and deconvoluted between

4,000-6,000 Da, with a mass tolerance window of 2 Da, with 5% of base peak threshold set for reporting (GSK). Alternatively, data was scanned between 1.0-3.0 min and deconvoluted between 3,000-8,000 Da, with a mass tolerance window of 1 Da, with 10% of base peak threshold set for reporting (UPenn). Na, K, NH<sub>4</sub>, and HFIP adducts were included in the product percentage. Detailed parameters can be found later in the Supporting Information.

## 2 Synthetic Protocols

### 2.1 Preparation of the DNA-tagged Olefin Headpieces (HP-1a to HP-1g)

The DNA-tagged olefin headpieces employed in the scope of the reported transformation (**Figure S2**) were prepared according to **General Procedure I** from the coupling between the DNA-HP-NH<sub>2</sub> tag and the corresponding carboxylic acids.

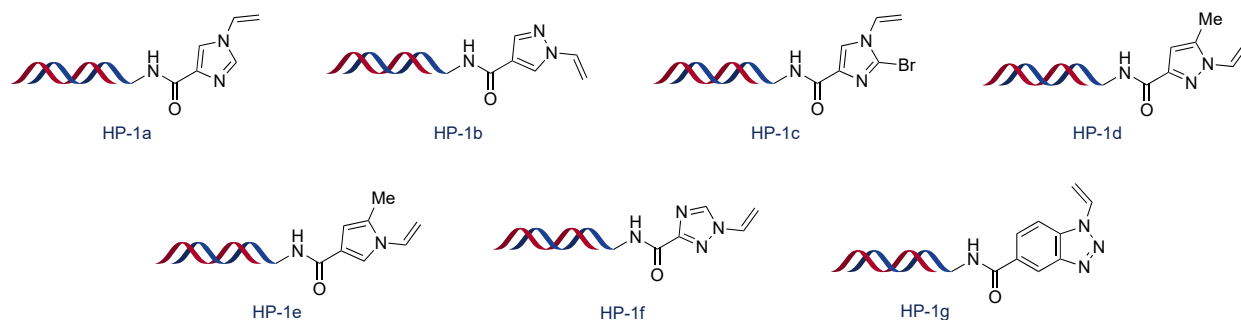

**Figure S2.** Molecular structures of the DNA-tagged olefin headpieces employed in the scope.

#### 2.1.1 General Procedure I (GP-I): Acylation of DNA-HP-NH<sub>2</sub>

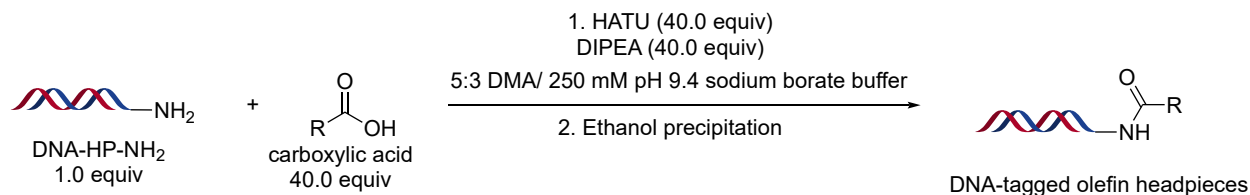

Solutions of HATU (200 mM in DMA, 40.0 equiv), DIPEA (200 mM in DMA, 40.0 equiv), and the corresponding carboxylic acid (200 mM in DMA, 40.0 equiv) were cooled to 4 °C. Subsequently, the solutions of carboxylic acid, DIPEA, and HATU were combined and vortexed

with a Fisherbrand™ Mini Vortex Mixer. The mixture was allowed to react at 4 °C for 20 min. To this solution, the DNA-HP-NH<sub>2</sub> in sodium borate buffer (1 mM in 250 mM pH 9.4) was added and vigorously vortexed.<sup>1</sup> The reaction mixture was left to react at rt for 1 h, and after this period, worked-up by EtOH precipitation method as follow:

A solution of 5 M NaCl in H<sub>2</sub>O (10% of the reaction volume) was added, followed by the addition of cold absolute EtOH (200 Proof, 2.5 reaction volumes). The mixture was vortexed and kept overnight at -20 °C in the freezer before being centrifuged a 4,000 rpm for 30 min at 4 °C. The supernatant was discarded, and the obtained solid was dried under reduced pressure in the lyophilizer for 1 h. The DNA pellet was then re-dissolved in HyPure™ Molecular Biology Grade H<sub>2</sub>O to a final concentration of 5 mM. The title compounds were analyzed via LC/MS and used for the visible light-mediated reactions without further purification.

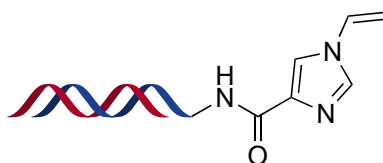

HP-1a

Chemical Formula: C<sub>171</sub>H<sub>240</sub>N<sub>55</sub>O<sub>107</sub>P<sub>17</sub>  
Exact Mass: 5302.0569  
Molecular Weight: 5304.6330

Prepared according to **GP-I** using DNA-HP-NH<sub>2</sub> (0.013 g, 2.5 μmol, 1.0 equiv), HATU (0.037 g, 0.1 mmol, 40.0 equiv, 200 mM in DMA), DIPEA (0.017 mL, 0.1 mmol, 40.0 equiv, 200 mM in DMA), and 1-vinyl-1H-imidazole-4-carboxylic acid (0.014 g, 0.1 mmol, 40.0 equiv, 200 mM in DMA). **HP-1a** was obtained with > 95% conversion.

---

<sup>1</sup> Phelan, J. P.; Lang, S. B.; Sim, J.; Berrit, S.; Peat, A. J.; Billings, K. Molander, G. A. *J. Am. Chem. Soc.* 2019, **141**, 8, 3723-3732.

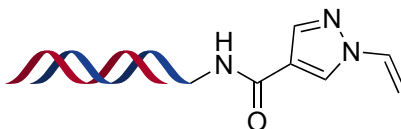

HP-1b

Chemical Formula:  $C_{171}H_{240}N_{55}O_{107}P_{17}$   
Exact Mass: 5302.0569  
Molecular Weight: 5304.6330

Prepared according to **GP-I** using DNA-HP-NH<sub>2</sub> (0.0259 g, 5.0 μmol, 1.0 equiv), HATU (0.076 g, 0.2 mmol, 40.0 equiv, 200 mM in DMA), DIPEA (0.035 mL, 0.2 mmol, 40.0 equiv, 200 mM in DMA), and 1-vinyl-1*H*-pyrazole-4-carboxylic acid (0.027 g, 0.2 mmol, 40.0 equiv, 200 mM in DMA). **HP-1b** was obtained with 93% conversion.

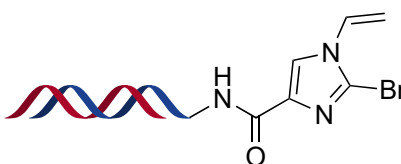

HP-1c

Chemical Formula:  $C_{171}H_{239}BrN_{55}O_{107}P_{17}$   
Exact Mass: 5379.9674  
Molecular Weight: 5383.5290

Prepared according to **GP-I** using DNA-HP-NH<sub>2</sub> (0.013 g, 2.5 μmol, 1.0 equiv), HATU (0.037 g, 0.1 mmol, 40.0 equiv, 200 mM in DMA), DIPEA (0.017 mL, 0.1 mmol, 40.0 equiv, 200 mM in DMA), and 2-bromo-1-vinyl-1*H*-imidazole-4-carboxylic acid (0.021 g, 0.1 mmol, 40.0 equiv, 200 mM in DMA). **HP-1c** was obtained with > 95% conversion.

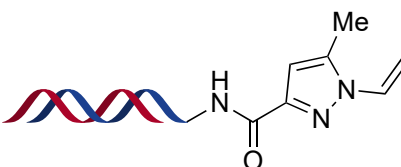

HP-1d

Chemical Formula:  $C_{172}H_{242}N_{55}O_{107}P_{17}$   
Exact Mass: 5316.0725  
Molecular Weight: 5318.6600

Prepared according to **GP-I** using DNA-HP-NH<sub>2</sub> (0.013 g, 2.5 μmol, 1.0 equiv), HATU (0.037 g, 0.1 mmol, 40.0 equiv, 200 mM in DMA), DIPEA (0.017 mL, 0.1 mmol, 40.0 equiv, 200 mM in DMA), and 5-methyl-1-vinyl-1*H*-pyrazole-3-carboxylic acid (0.015 g, 0.1 mmol, 40.0 equiv, 200 mM in DMA). **HP-1c** was obtained with > 95% conversion.



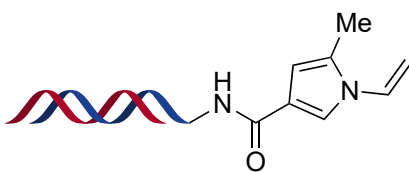

HP-1e

Chemical Formula:  $C_{173}H_{243}N_{54}O_{107}P_{17}$   
 Exact Mass: 5315.0773  
 Molecular Weight: 5317.6720

Prepared according to **GP-I** using DNA-HP-NH<sub>2</sub> (0.013 g, 2.5 μmol, 1.0 equiv), HATU (0.037 g, 0.1 mmol, 40.0 equiv, 200 mM in DMA), DIPEA (0.017 mL, 0.1 mmol, 40.0 equiv, 200 mM in DMA), and 5-methyl-1-vinyl-1*H*-pyrrole-3-carboxylic acid (0.015 g, 0.1 mmol, 40.0 equiv, 200 mM in DMA). **HP-1e** was obtained with > 95% conversion.

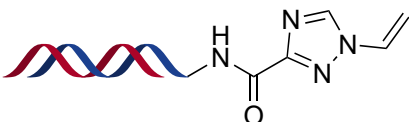

HP-1f

Chemical Formula:  $C_{170}H_{239}N_{56}O_{107}P_{17}$   
 Exact Mass: 5303.0521  
 Molecular Weight: 5305.6210

Prepared according to **GP-I** using DNA-HP-NH<sub>2</sub> (0.013 g, 2.5 μmol, 1.0 equiv), HATU (0.037 g, 0.1 mmol, 40.0 equiv, 200 mM in DMA), DIPEA (0.017 mL, 0.1 mmol, 40.0 equiv, 200 mM in DMA), and 1-vinyl-1*H*-imidazole-4-carboxylic acid (0.014 g, 0.1 mmol, 40.0 equiv, 200 mM in DMA). **HP-1f** was obtained with > 95% conversion.

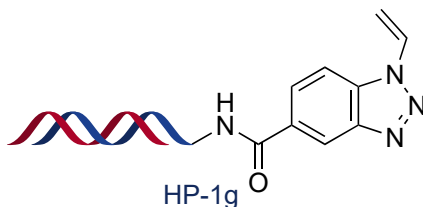

HP-1g

Chemical Formula:  $C_{174}H_{241}N_{56}O_{107}P_{17}$   
 Exact Mass: 5353.0678  
 Molecular Weight: 5355.6810

Prepared according to **GP-I** using DNA-HP-NH<sub>2</sub> (0.027 g, 5.3 μmol, 1.0 equiv), HATU (0.080 g, 0.2 mmol, 40.0 equiv, 200 mM in DMA), DIPEA (0.037 mL, 0.2 mmol, 40.0 equiv, 200 mM in DMA), and 1-vinyl-1*H*-benzo[*d*][1,2,3]triazole-5-carboxylic acid (0.040 g, 0.2 mmol, 40.0 equiv, 200 mM in DMA). **HP-1g** was obtained with > 95% conversion.

## 2.2 Synthesis of Small Molecules (*N*-heterocyclic carboxylic acids 1a-1g)

The *N*-heterocyclic carboxylic acids **1a-1g** employed in the scope of the reported transformation (**Figure S3**) were prepared according to the **General Procedure II**. All the *N*-heterocyclic esters starting materials (**1c'-1g'**) were received from GlaxoSmithKline, Inc. The carboxylic acids **1a** and **1b** were also received and use directly in the protocols.

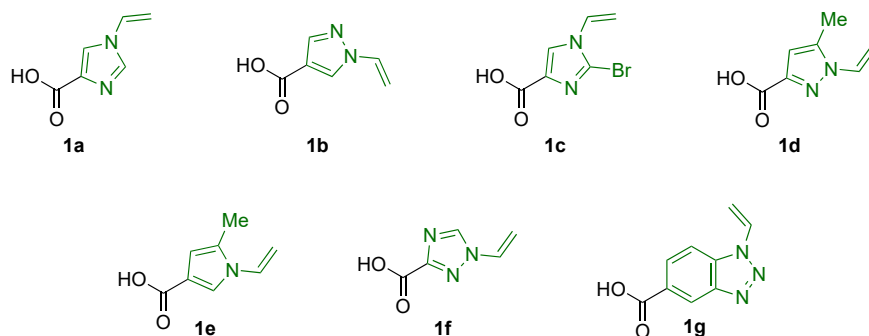

**Figure S3.** *N*-Heterocyclic carboxylic acids synthesized for the headpiece's preparation.

### 2.2.1 General Procedure II (GP-II): Preparation and Characterization of *N*-Vinylated Heterocycles

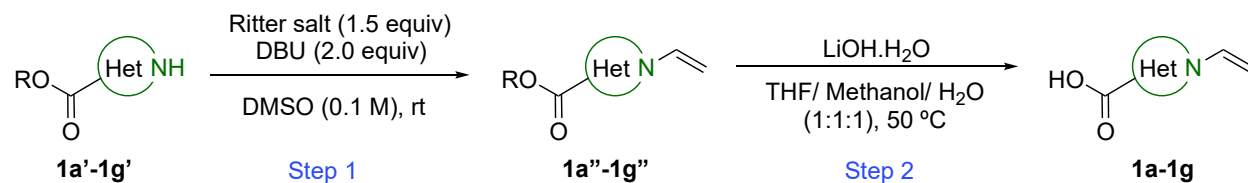

#### Step 1 – Vinylation of Alkyl Heterocycles

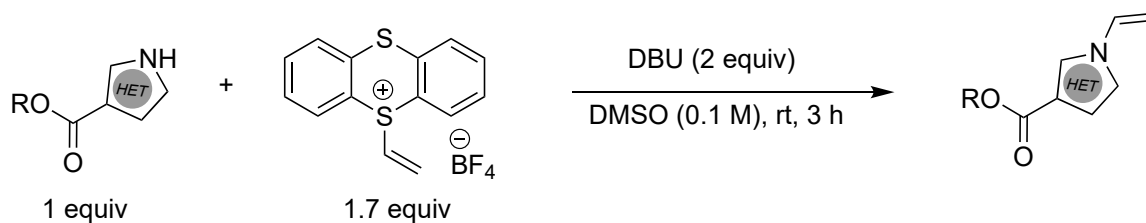

The vinylation of *N*-heterocycles was adapted from a reported procedure:<sup>2</sup> Under air, a vial was charged with the corresponding heterocyclic compound (1.0 equiv) and vinyl thianthrenium tetrafluoroborate (1.7 equiv). Then, DMSO (conc = 0.10 M) was added, followed by DBU (2.0 equiv), and the mixture was stirred at 25 °C for 3 h. The solvent was subsequently removed under reduced pressure, and the residue was purified by flash column chromatography to yield the corresponding product.

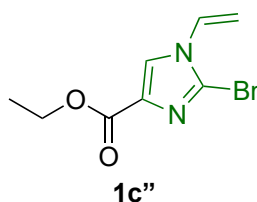

**Ethyl 2-Bromo-1-vinyl-1H-imidazole-4-carboxylate (1c'')**: Prepared according to **GP-II (1)** using ethyl 2-bromo-1*H*-imidazole-4-carboxylate (0.100 g, 0.5 mmol, 1.0 equiv), vinyl thianthrenium tetrafluoroborate (0.28 g, 0.85 mmol, 1.7 equiv) and DBU (0.15 g, 0.15 mL, 1 mmol, 2.0 equiv) in DMSO (5 mL). Purification by flash column chromatography (EtOAc/hexane) afforded the pure title compound **1c''** as a yellow solid (0.039 g, 32%). **MP** (°C) 124 – 126.

**<sup>1</sup>H NMR** (600 MHz, CDCl<sub>3</sub>), δ (ppm) 7.86 (s, 1H), 6.92 (dd, *J* = 15.6, 8.8 Hz, 1H), 5.37 (dd, *J* = 15.7, 2.1 Hz, 1H), 5.09 (dd, *J* = 8.8, 2.1 Hz, 1H), 4.31 (q, *J* = 7.1 Hz, 2H), 1.31 (t, *J* = 7.1 Hz, 3H).

**<sup>13</sup>C NMR** (151 MHz, CDCl<sub>3</sub>), δ (ppm) 161.6, 135.0, 128.7, 123.2, 120.7, 105.9, 61.1, 14.4.

**FT-IR** (cm<sup>-1</sup>, neat, ATR)  $\tilde{\nu}$  = 3136, 2982, 1728, 1644, 1552, 1458, 1382, 1364, 1311, 1290, 1222, 1196, 1133, 1094, 1025, 956, 904, 834, 762, 658.

**HRMS (ESI)** calcd for C<sub>8</sub>H<sub>9</sub>N<sub>2</sub>O<sub>2</sub>Br [M]<sup>+</sup>: 243.9847, found: 243.9828.

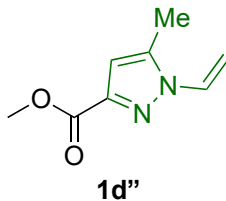

**Methyl 5-Methyl-1-vinyl-1H-pyrazole-3-carboxylate (1d'')**: Prepared according to **GP-II (1)** using methyl 5-methyl-1H-pyrazole-3-carboxylate (0.70 g, 0.5 mmol, 1.0 equiv), vinyl thianthrenium tetrafluoroborate (0.28 g, 0.85 mmol, 1.7 equiv), and DBU (0.15 g, 0.15 mL, 1 mmol, 2.0 equiv) in DMSO (5 mL). Purification by flash column chromatography (EtOAc/hexane) afforded the pure title compound **1d''** as a clear sticky liquid (0.032 g, 39%).

**<sup>1</sup>H NMR** (400 MHz, CDCl<sub>3</sub>), δ (ppm) 6.99 (dd, *J* = 15.4, 8.9 Hz, 1H), 6.62 (s, 1H), 5.91 (d, *J* = 15.4 Hz, 1H), 5.04 (d, *J* = 8.9 Hz, 1H), 3.93 (s, 3H), 2.37 (s, 3H).

**<sup>13</sup>C NMR** (101 MHz, CDCl<sub>3</sub>), δ (ppm) 162.8, 143.6, 139.9, 129.3, 109.2, 104.7, 52.1, 11.2.

**FT-IR** (cm<sup>-1</sup>, neat, ATR),  $\tilde{\nu}$  = 3115, 2924, 1733, 1651, 1495, 1453, 1326, 1270, 1222, 1183, 1019, 960, 904, 845, 671.

**HRMS (ESI)** calcd for C<sub>8</sub>H<sub>10</sub>N<sub>2</sub>O<sub>2</sub> [M]<sup>+</sup>: 166.0742, found 166.0745.

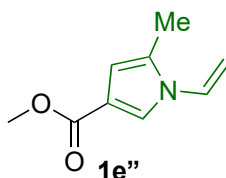

**Methyl 5-Methyl-1-vinyl-1H-pyrrole-3-carboxylate (1e'')**: Prepared according to **GP-II (1)** using methyl 5-methyl-1H-pyrrole-3-carboxylate (0.70 g, 0.5 mmol, 1.0 equiv), vinyl thianthrenium tetrafluoroborate (0.28 g, 0.85 mmol, 1.7 equiv) and DBU (0.15 g, 0.15 mL, 1 mmol, 2.0 equiv) in DMSO (5 mL). Purification by flash column chromatography (EtOAc/hexane) afforded the pure title compound **1e''** as a yellow sticky liquid (0.030 g, 36%).

**<sup>1</sup>H NMR** (600 MHz, CDCl<sub>3</sub>), δ (ppm) 7.55 (d, *J* = 1.8 Hz, 1H), 6.83 (dd, *J* = 15.7, 8.8 Hz, 1H), 6.31 (s, 1H), 5.24 (dd, *J* = 15.7, 1.4 Hz, 1H), 4.84 (dd, *J* = 8.9, 1.4 Hz, 1H), 3.80 (s, 3H), 2.24 (s, 3H).

**<sup>13</sup>C NMR** (151 MHz, CDCl<sub>3</sub>), δ (ppm) 165.1, 130.1, 121.4, 116.3, 108.9, 101.4, 51.1, 12.0.

**FT-IR** (cm<sup>-1</sup>, neat, ATR),  $\tilde{\nu}$  = 2925, 1710, 1219.

**HRMS (ESI)** calcd for C<sub>9</sub>H<sub>11</sub>NO<sub>2</sub> [M]<sup>+</sup>: 165.0790, found 165.0788.

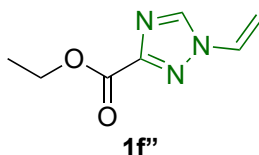

**Ethyl 1-Vinyl-1H-1,2,4-triazole-3-carboxylate (1f'')**: Prepared according to **GP-II (1)** using methyl ethyl 1*H*-1,2,4-triazole-3-carboxylate (0.71 g, 0.5 mmol, 1.0 equiv), vinyl thianthrenium tetrafluoroborate (0.28 g, 0.85 mmol, 1.7 equiv), and DBU (0.15 g, 0.15 mL, 1 mmol, 2.0 equiv) in DMSO (5 mL). Purification by flash column chromatography (using only EtOAc) afforded the pure title compound **1f''** as a white solid (0.052 g, 62%). **MP** (°C) 66 – 68.

**<sup>1</sup>H NMR** (600 MHz, CDCl<sub>3</sub>), δ (ppm) 8.28 (s, 1H), 7.06 (dd, *J* = 15.6, 8.8 Hz, 1H), 6.02 – 5.70 (m, 1H), 5.19 (d, *J* = 8.8 Hz, 1H), 4.44 (q, *J* = 7.1 Hz, 2H), 1.38 (t, *J* = 7.1 Hz, 3H).

**<sup>13</sup>C NMR** (151 MHz, CDCl<sub>3</sub>), δ (ppm) 159.5, 155.3, 142.9, 129.1, 106.9, 62.2, 14.2.

**FT-IR** (cm<sup>-1</sup>, neat, ATR),  $\tilde{\nu}$  = 1730, 1651, 1495, 1470, 1451, 1391, 1325, 1270, 1218, 1180, 1162, 1095, 1041, 1018, 959, 903, 867, 845, 694, 671.

**HRMS (ESI)** calcd for C<sub>7</sub>H<sub>10</sub>N<sub>3</sub>O<sub>2</sub> [M+H]: 168.0773, found 168.0775.

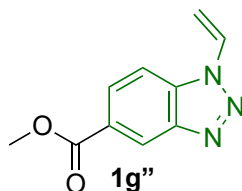

**Methyl 1-Vinyl-1H-benzo[*d*][1,2,3]triazole-5-carboxylate (1g'')**: Prepared according to **GP-II (1)** using methyl 1*H*-benzo[*d*][1,2,3]triazole-5-carboxylate (0.89 g, 0.5 mmol, 1.0 equiv), vinyl thianthrenium tetrafluoroborate (0.28 g, 0.85 mmol, 1.7 equiv), and DBU (0.15 g, 0.15 mL, 1

mmol, 2.0 equiv) in DMSO (5 mL). Purification by flash column chromatography (using only EtOAc) afforded the pure title compound **1g** as a white solid (0.052 g, 51%). **MP** (°C) 100 – 102.

**<sup>1</sup>H NMR** (600 MHz, CDCl<sub>3</sub>), δ (ppm) δ 8.64 (s, 1H), 8.03 (d, *J* = 4.4 Hz, 1H), 7.91 – 7.86 (m, 1H), 7.59 (ddd, *J* = 14.8, 7.3, 3.2 Hz, 1H), 6.44 (dd, *J* = 15.6, 2.5 Hz, 1H), 5.49 – 5.35 (m, 1H), 3.98 (s, 3H).

**<sup>13</sup>C NMR** (151 MHz, CDCl<sub>3</sub>), δ (ppm) 166.6, 146.4, 144.1, 134.2, 129.2, 127.3, 122.0, 118.3, 109.5, 52.5.

**FT-IR** (cm<sup>-1</sup>, neat, ATR),  $\tilde{\nu}$  = 1720, 1709, 1461, 1436, 1361, 1321, 1288, 1267, 1235, 1219, 1181, 1137, 1082, 1045, 955, 911, 832, 811, 773, 748.

**HRMS (ESI)** calcd for C<sub>10</sub>H<sub>9</sub>N<sub>3</sub>O<sub>2</sub> [M]<sup>+</sup>: 203.0695, found 203.0706.

## Step 2 – Hydrolysis of Alkyl *N*-Vinylated Heterocycles

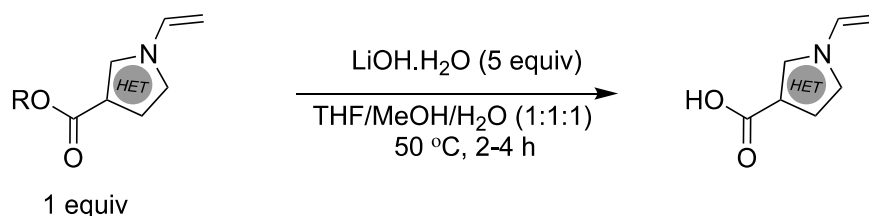

The ester hydrolysis of vinylated *N*-heterocycles was carried out according to a modified literature procedure.<sup>4</sup> Under air, a vial was charged with the corresponding vinylated *N*-heterocyclic compound (1.0 equiv). A solution of THF/MeOH/H<sub>2</sub>O (1:1:1) was added followed by the addition of LiOH.H<sub>2</sub>O (5.0 equiv), and the reaction was stirred at 50 °C until completion (monitored by TLC). The reaction mixture is then evaporated *in vacuo*, and the crude is taken up with H<sub>2</sub>O, acidified with 1 N HCl to pH = ~1, and extracted 3 times with EtOAc. The combined organic layers were evaporated, and the crude product was used directly in the next step.

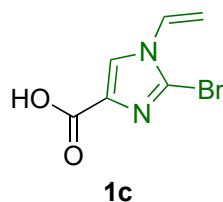

**2-Bromo-1H-imidazole-4-carboxylic Acid (1c)**: Prepared according to **GP-II (2)** using **1c**” (0.025 g, 0.10 mmol, 1.0 equiv), LiOH•H<sub>2</sub>O (0.021 g, 0.50 mmol, 5.0 equiv) in a mixture of THF/MeOH/H<sub>2</sub>O (1:1:1, 3 mL). The pure title compound **1c** was obtained as a yellow solid (0.018 g, 83%). **MP** (°C) 124 – 126.

**<sup>1</sup>H NMR** (600 MHz, CD<sub>3</sub>CN) δ 8.11 (s, 1H), 7.29 (br, 1H), 7.02 (dd, *J* = 15.6, 8.9 Hz, 1H), 5.59 (dd, *J* = 15.5, 2.0 Hz, 1H), 5.18 (dd, *J* = 8.8, 1.9 Hz, 1H).

**<sup>13</sup>C NMR** (151 MHz, CD<sub>3</sub>CN) δ 162.6, 134.7, 129.8, 125.5, 121.4, 107.5.

**FT-IR** (cm<sup>-1</sup>, neat, ATR),  $\tilde{\nu}$  = 2923, 1709, 1458, 1144, 1025, 904, 747.

**HRMS (ESI)** calcd for C<sub>6</sub>H<sub>5</sub>N<sub>2</sub>O<sub>2</sub>Br [M<sup>+</sup>]: 216.9613, found 216.9630.

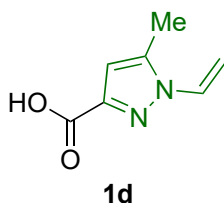

**5-Methyl-1-vinyl-1H-pyrazole-3-carboxylic Acid (1d)**: Prepared according to **GP-II (2)** using **1d**” (0.025 g, 0.15 mmol, 1.0 equiv), LiOH•H<sub>2</sub>O (0.032 g, 0.75 mmol, 5.0 equiv) in a mixture of THF/MeOH/H<sub>2</sub>O (1:1:1, 3 mL). The pure title compound **1d** was obtained as a white solid (0.016 g, 70%). **MP** (°C) 129 – 131.

**<sup>1</sup>H NMR** (400 MHz, CD<sub>3</sub>CN), δ (ppm) 12.22 (s, 1H), 6.70 (dd, *J* = 15.2, 8.7 Hz, 1H), 6.01 (s, 1H), 5.14 (d, *J* = 15.2 Hz, 1H), 4.46 (d, *J* = 8.7 Hz, 1H), 1.79 (s, 3H).

**<sup>13</sup>C NMR** (101 MHz, CD<sub>3</sub>CN), δ (ppm) 168.3, 149.2, 145.7, 135.5, 113.9, 108.3, 15.7.

**FT-IR** (cm<sup>-1</sup>, neat, ATR),  $\tilde{\nu}$  = 3110, 1701, 1491, 1290, 901, 844, 630.

**HRMS (ESI)** calcd for C<sub>7</sub>H<sub>8</sub>N<sub>2</sub>O [M<sup>+</sup>]: 152.0586, found 152.0595.

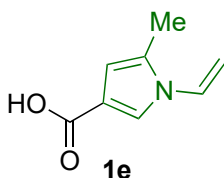

**5-Methyl-1-vinyl-1H-pyrrole-3-carboxylic Acid (1e):** Prepared according to **GP-II (2)** using **1e''** (0.025 g, 0.15 mmol, 1.0 equiv), LiOH•H<sub>2</sub>O (0.032 g, 0.75 mmol, 5.0 equiv) in a mixture of THF/MeOH/H<sub>2</sub>O (1:1:1, 3 mL). The pure title compound **1e** was obtained as a brown solid (0.017 g, 74%). **MP** (°C) 80 – 82.

**<sup>1</sup>H NMR** (600 MHz, CD<sub>3</sub>CN), δ (ppm) 9.18 (br, 1H), 7.65 (d, *J* = 1.8 Hz, 1H), 6.99 (dd, *J* = 15.6, 8.9 Hz, 1H), 6.27 (s, 1H), 5.38 (dd, *J* = 15.6, 1.4 Hz, 1H), 4.90 (dd, *J* = 8.9, 1.4 Hz, 1H), 2.26 (s, 3H).

**<sup>13</sup>C NMR** (151 MHz, CD<sub>3</sub>CN), δ (ppm) 165.8, 131.1, 130.8, 122.3, 116.3, 109.3, 101.7, 11.6.

**FT-IR** (cm<sup>-1</sup>, neat, ATR),  $\tilde{\nu}$  = 2924, 2854, 1671, 1643, 1530, 1454, 1404, 1326, 1256, 1197, 971, 790, 748, 564.

**HRMS (ESI)** calcd for C<sub>8</sub>H<sub>9</sub>NO<sub>2</sub> [M<sup>+</sup>]: 151.0633, found 151.0640.

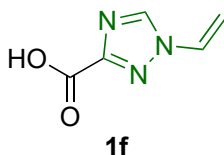

**1-Vinyl-1H-1,2,4-triazole-3-carboxylic Acid (1f):** Prepared according to **GP-II (2)** using **1f''** (0.034 g, 0.20 mmol, 1.0 equiv), LiOH•H<sub>2</sub>O (0.042 g, 1.0 mmol, 5.0 equiv) in a mixture of THF/MeOH/H<sub>2</sub>O (1:1:1, 3 mL). The pure title compound **1f** was obtained as a white solid (0.021 g, 75%). **MP** (°C) 192 – 194.

**<sup>1</sup>H NMR** (600 MHz, DMSO-*d*<sub>6</sub>), δ (ppm) 13.47 (s, 1H), 8.95 (s, 1H), 7.42 (dd, *J* = 15.5, 8.8 Hz, 1H), 5.85 (dd, *J* = 15.5, 1.3 Hz, 1H), 5.23 (dd, *J* = 8.8, 1.3 Hz, 1H).

**<sup>13</sup>C NMR** (151 MHz, DMSO-*d*<sub>6</sub>), δ (ppm) 161.1, 155.6, 145.3, 130.4, 106.0.

**FT-IR** (cm<sup>-1</sup>, neat, ATR),  $\tilde{\nu}$  = 2923, 2800, 1790, 1450, 1255, 950, 910.

**HRMS (ESI)** calcd for C<sub>5</sub>H<sub>5</sub>N<sub>3</sub>O<sub>2</sub> [M<sup>+</sup>]: 140.0460, found 140.0459.

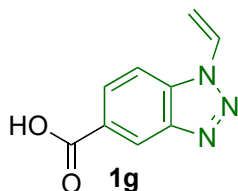



**1-Vinyl-1H-benzo[d][1,2,3]triazole-5-carboxylic Acid (1g):** Prepared according to **GP-II (2)** using **1g** (0.040 g, 0.20 mmol, 1.0 equiv), LiOH·H<sub>2</sub>O (0.042 g, 1.0 mmol, 5.0 equiv) in a mixture of THF/MeOH/H<sub>2</sub>O (1:1:1, 3 mL). The pure title compound **1g** was obtained as a white solid (0.024 g, 63%). **MP** (°C) 206 – 208.

**<sup>1</sup>H NMR** (600 MHz, d<sub>6</sub>-DMSO), δ (ppm) 13.30 (s, 1H), 8.56 (s, 1H), 8.13 – 7.95 (m, 2H), 7.86 (dd, *J* = 15.4, 8.6 Hz, 1H), 6.39 (d, *J* = 15.4 Hz, 1H), 5.60 (d, *J* = 8.6 Hz, 1H).

**<sup>13</sup>C NMR** (151 MHz, CDCl<sub>3</sub>), δ (ppm) 167.3, 146.2, 144.0, 134.9, 130.5, 127.7, 121.8, 118.8, 110.8.

**FT-IR** (cm<sup>-1</sup>, neat, ATR),  $\tilde{\nu}$  = 3469, 2933, 1709, 1626, 1551, 1499, 1412, 1395, 1357, 1263, 1187, 1058, 1012, 960, 849, 778, 754, 669, 590, 473.

**HRMS (ESI)** calcd for C<sub>9</sub>H<sub>7</sub>N<sub>3</sub>O<sub>2</sub> [M<sup>+</sup>]: 227.0884, found: 227.0881.

### 3 General Procedure III (GP-III): Hydroalkylation of *N*-Vinyl Heterocycles

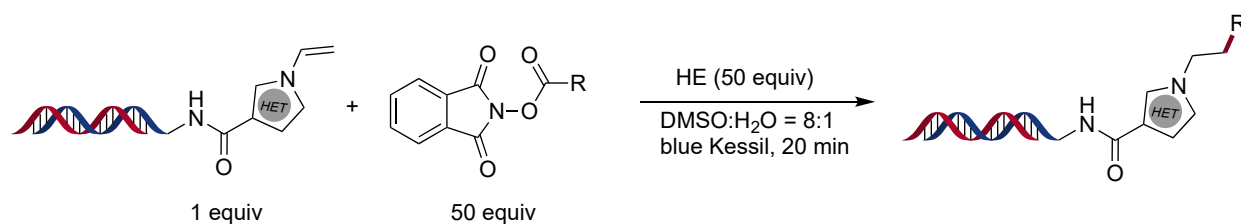

To an Eppendorf PCR microcentrifuge tube were added RAE (30 μL of a 41.7 nmol/μL soln in DMSO, 1250 nmol, 50 equiv), Hantzch Ester (HE) (10 μL of a 125 nmol/μL soln in DMSO, 1250 nmol, 50 equiv), and the DNA-tethered *N*-vinyl heterocycle (5 μL of a 5 nmol/μL soln in H<sub>2</sub>O, 25 nmol, 1.0 equiv). The PCR tube was capped, and the reaction mixture was vortexed and placed at 1.5 inches from the irradiation source (Kessil H150-456 nm blue lamp) for 20 min. For the work-up, a solution of 5 M NaCl in HyPure™ Molecular Biology Grade H<sub>2</sub>O (4.5 μL) was added, followed by the addition of cold EtOH (160 μL). The mixture was left at –20 °C for 1 h and then centrifuged at 6,000 rpm for 15 min. The supernatant was discarded, and the DNA pellet was re-dissolved in H<sub>2</sub>O (150 μL), and analyzed via LC/MS.

## 4 Control Experiment

The control experiment was performed following the **GP-III** with a **control-HP** derived from benzoic acid. As result, no product from a side reaction with the RAE **2g** was observed, and only the control-HP was recovered. This result indicates that there is no evidence of reaction on the structure of the DNA- tag, and the only reactive site toward the hydroalkylation reaction is the attached olefin.

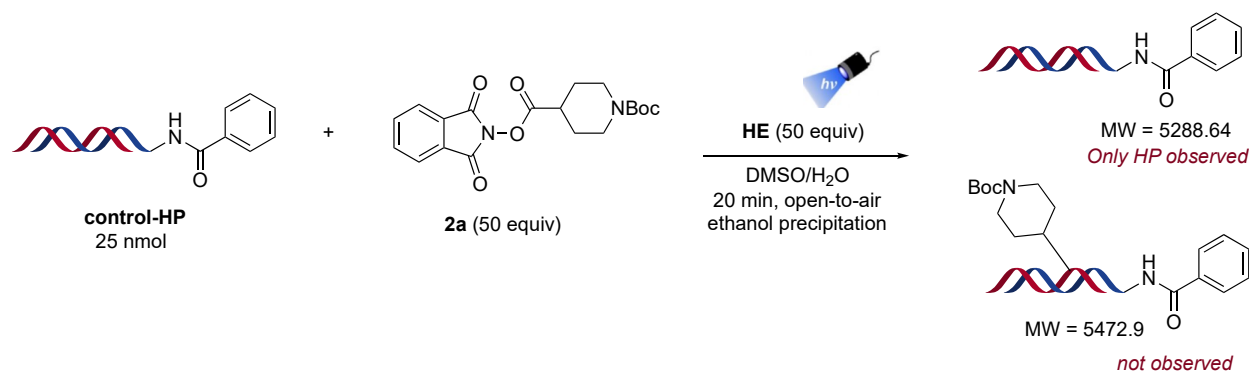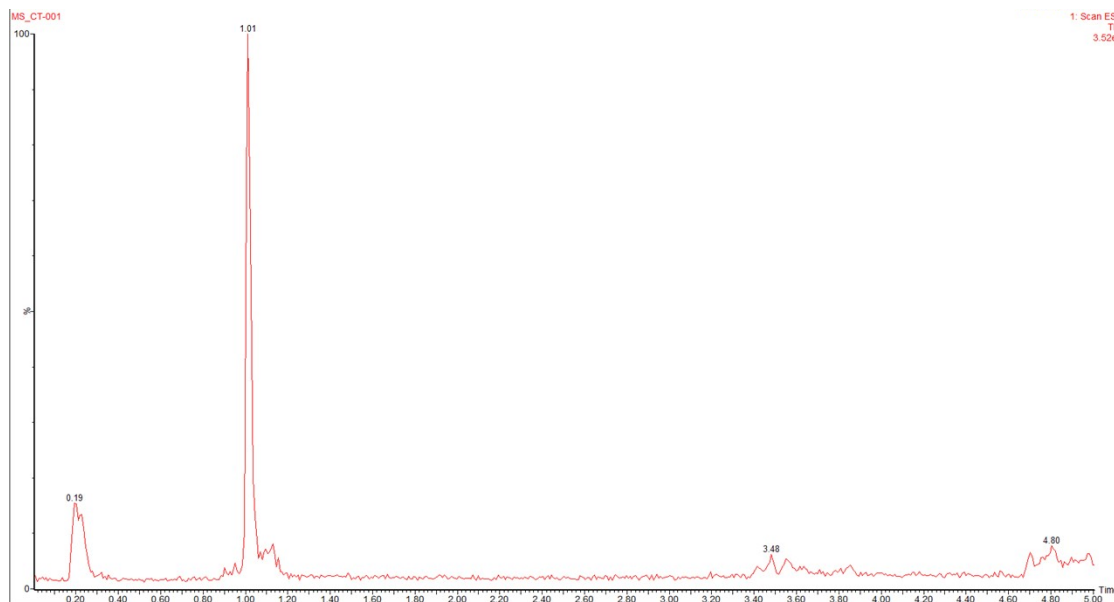

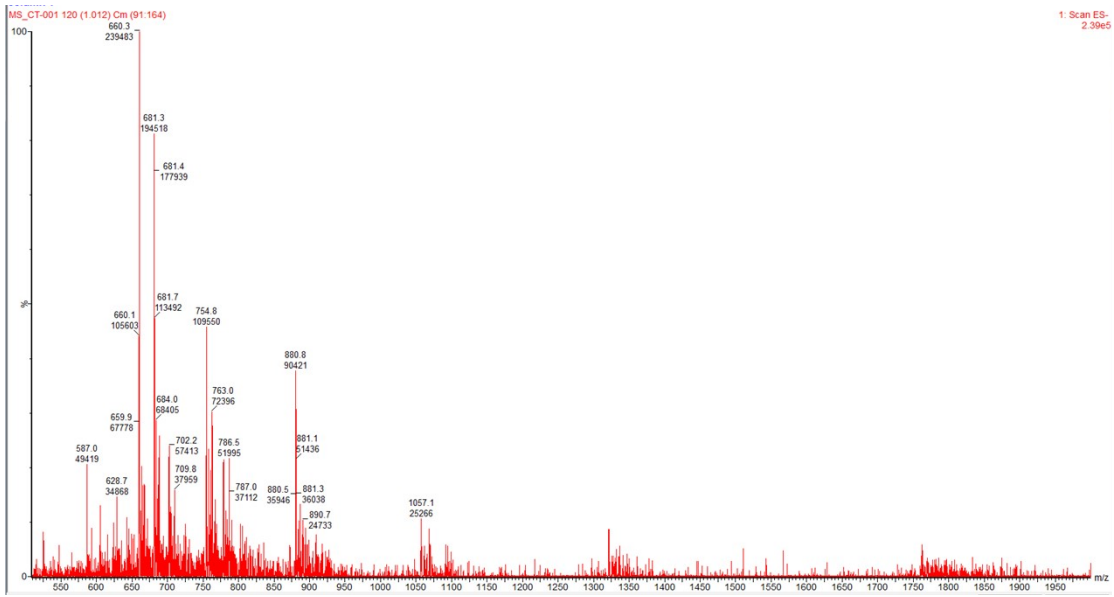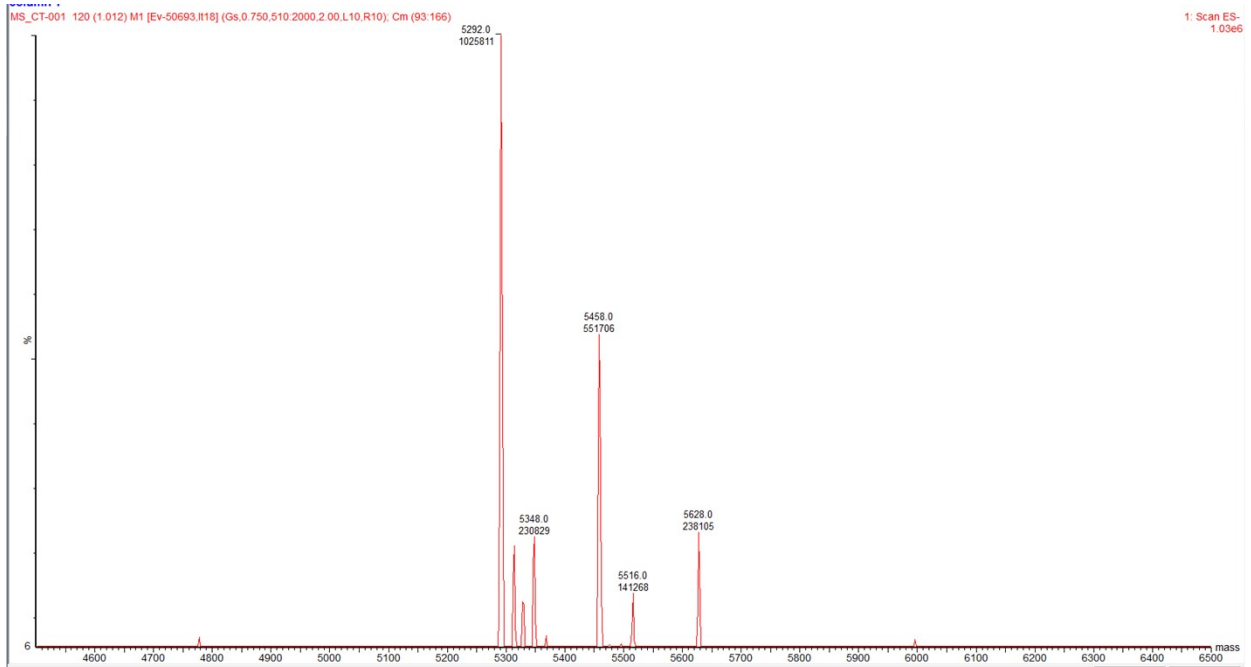

## 5 DNA Damage Assessment

qPCR, PCR, and Sequencing

4-Cycle tag mimic sequence

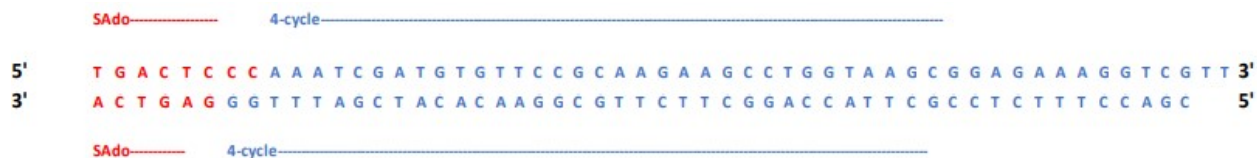

### 4-Cycle tag synthesis (pyrazole)

The top and bottom strands (purchased from IDT as lyophilized powders) of a control 4-cycle tag were annealed by combining 562.5 nmol of each strand (2 mM in H<sub>2</sub>O), heating to 95 °C for 5 min, then cooling to rt. The annealed tag solution (1.2 equiv) was then added to the pyrazole headpiece (250 μL, 2 mM in H<sub>2</sub>O), followed by 200 μL 10x T4 ligation buffer, 4 mL of H<sub>2</sub>O, and 20 μL T4 DNA ligase purchased from Syngene. The ligation solution was vortexed and let sit at rt overnight. LCMS was taken to confirm full conversion to desired product. The ligation was precipitated for 30 min at -80 °C following addition of 500 μL of 5 M NaCl (aq) and 12 mL of cold EtOH. The precipitated solution was then centrifuged at 3,500 rpm at 4 °C for 30 min, and the solvent was decanted to afford the DNA pellet, which was dried on a lyophilizer overnight. The crude pellet was resuspended in 1 mL of H<sub>2</sub>O and purified by HPLC (Column: Gemini C18, 5 μm, 21.2x100 mm; Gradient: 5 to 50% B in 25 min, 20 mL/min; UV at 260 nm; Solvent A: 50 mM TEAA, pH 7.5; Solvent B: 1% H<sub>2</sub>O in MeCN) to afford the desired product. The lyophilized product was analyzed by optical density using a composite extinction coefficient of 1176468 L/(mol-cm) to determine isolated yield (142 nmol, 28.45%). LCMS calcd: 34,378, found: 34,379.

### Closing primer ligation on reacted material

Top Strand: 5'-/5Phos/ACG ATG CCC GGT CTA CNN NNN NNN NNN NCT GAT GGC GCG AGG GAG GC3'

Bottom Strand: 5'-GTA GAC CGG GCA TCG TAA-3'

The exemplar reaction samples received from UPenn were transferred to PCR vials, frozen, and lyophilized. Once dry, the resulting pellet was redissolved in H<sub>2</sub>O to obtain an OD. 10 nmol (1 mM in H<sub>2</sub>O) of the sample was transferred to another PCR tube, and to that was added 0.5 μL of ligase, followed by 5 μL of 10x T4 ligation buffer, 12.5 μL of annealed closing tag (1.25 equiv), and 24.5 μL of H<sub>2</sub>O. The vials were vortexed and left at rt overnight. LCMS was taken but still

showed some starting material and minimal closing tag ligation product. An additional 1  $\mu\text{L}$  of ligase, 12.5  $\mu\text{L}$  of annealed closing tag, 10  $\mu\text{L}$  of 10x T4 ligation buffer, and 20  $\mu\text{L}$  of  $\text{H}_2\text{O}$  was added to each vial and again allowed to continue at rt overnight. LCMS was taken suggesting closing tag ligation had gone to completion.

### Closing Tag Ligation Sample A

**Red:** 4 Cycle Starting Material

**Blue:** Closing Tag Ligation Overnight

**Green:** Closing Tag Ligation Push Overnight

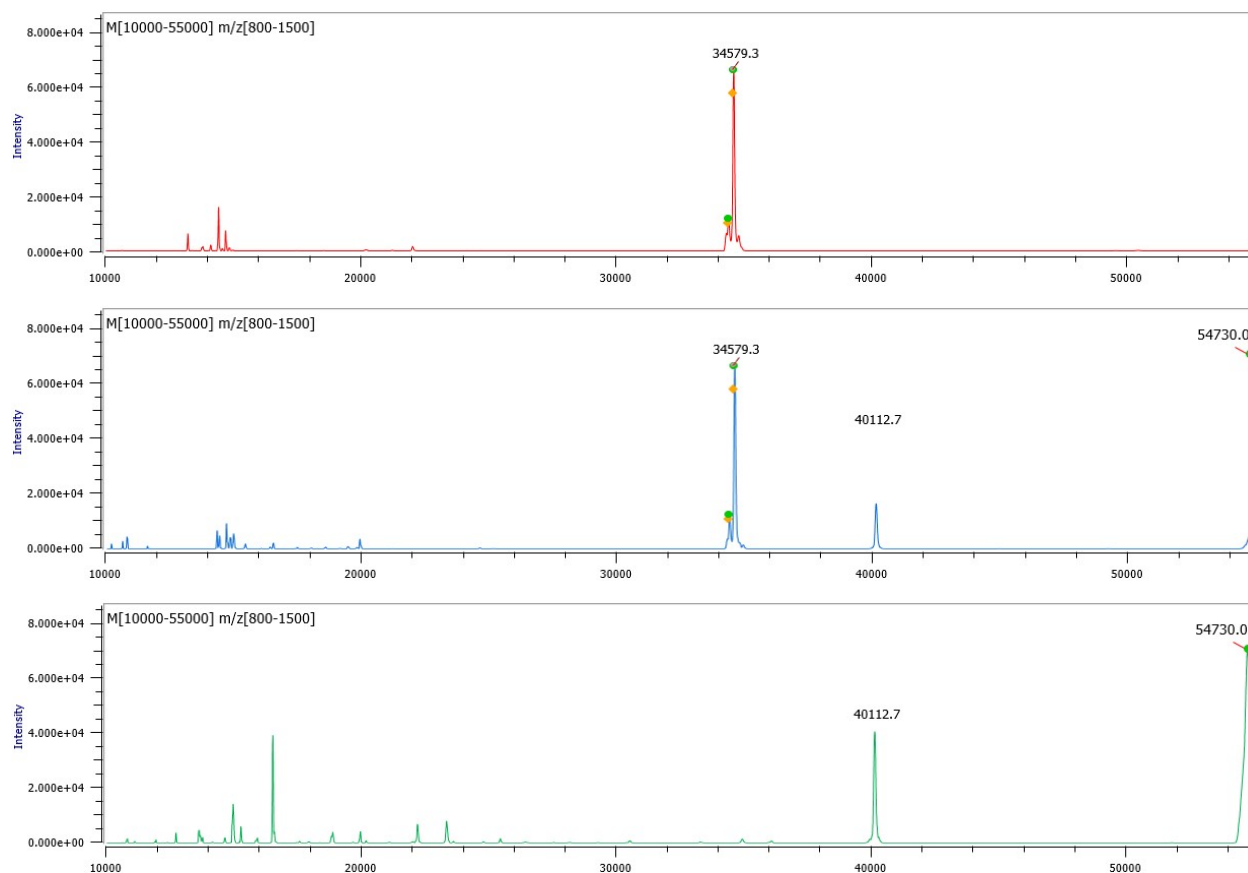

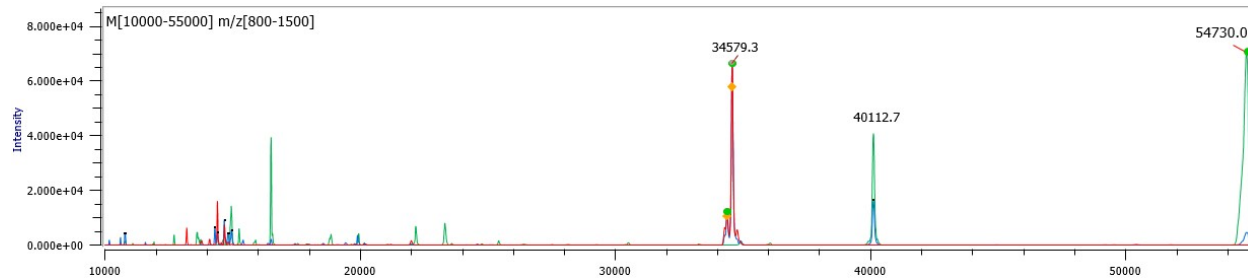

### Closing Tag Ligation Sample B

Red: 4 Cycle Starting Material

Blue: Closing Tag Ligation Overnight

Green: Closing Tag Ligation Push Overnight

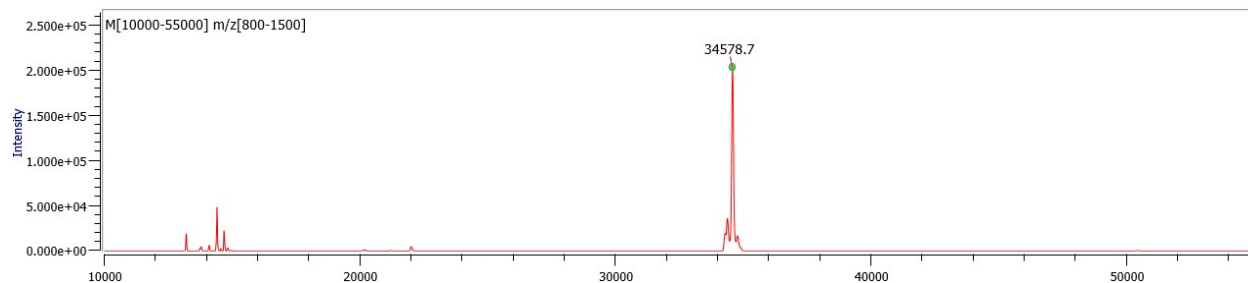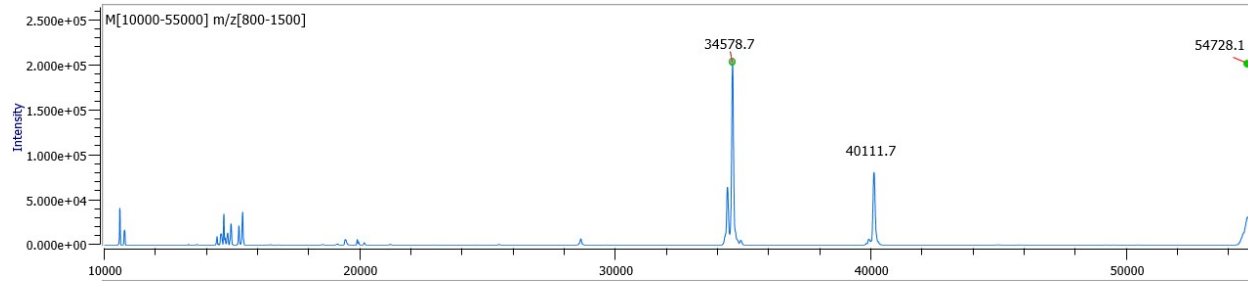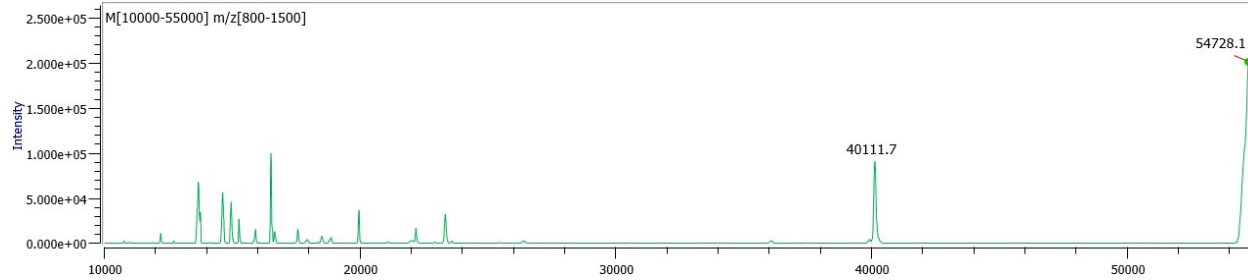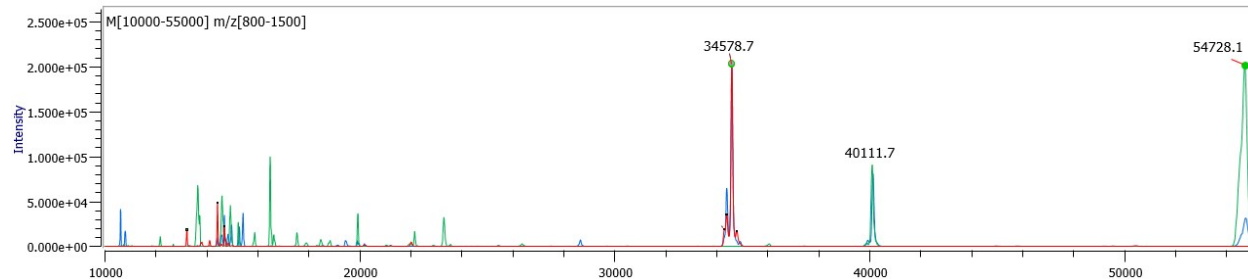

## qPCR

qFor: 5'-GCT ACC TCT GAC TCC CAA ATC GAT GT -3'

qRev: 5'-ATA TTA GCC TCC CTC GCG CCA TCA -3'

Quantitative PCR was performed on a Roche LightCycler 480 II PCR system with SYBR Green I as the detection dye. A bulk master mix solution was prepared by combining 1 mL of SYBR green, 60  $\mu$ L of 10  $\mu$ M PCR primer 565 Cla, 60  $\mu$ L of 10  $\mu$ M PCR primer 454 short, and 680  $\mu$ L of H<sub>2</sub>O. To 2  $\mu$ L of sample was then added 18  $\mu$ L of master mix. Samples were subjected to qPCR:

| Stage         | Temperature/Time | Number of Cycle |
|---------------|------------------|-----------------|
| HotStart      | 95 °C/5 min      | 1               |
| Amplification | 95 °C/10 sec     | 40              |
|               | 55 °C/15 sec     |                 |
|               | 72 °C/15 sec     |                 |
| Melt          | 95 °C/1 sec      | 1               |
|               | 70 °C/1 sec      |                 |
|               | 95 °C            |                 |
| Cool          | 45 °C/30 sec     | 0               |

Samples were then analyzed using the 2nd derivative maximum standard protocol on the instrument to determine how many molecules were present per  $\mu$ L sample. Samples achieved acceptable consistency, suggesting that the conditions developed are not impacting the amount of amplifiable DNA present in a significant way.

## qPCR Raw Data

| Include | Pos | Name      | Cp    | Concentration | Standard   |
|---------|-----|-----------|-------|---------------|------------|
| TRUE    | A1  | Sample 2  | 7.86  | 1.23E+09      | 1000000000 |
| TRUE    | A2  | Sample 2  | 8.03  | 1.10E+09      | 1000000000 |
| TRUE    | B1  | Sample 14 | 11.67 | 9.94E+07      | 100000000  |

|      |    |           |       |          |           |
|------|----|-----------|-------|----------|-----------|
| TRUE | B2 | Sample 14 | 11.63 | 1.02E+08 | 100000000 |
| TRUE | B3 | Sample 15 | 12.57 | 5.47E+07 | 0         |
| TRUE | B4 | Sample 16 | 13.03 | 4.04E+07 | 0         |
| TRUE | B5 | Sample 17 | 13.75 | 2.52E+07 | 0         |
| TRUE | B6 | Sample 18 | 13.84 | 2.37E+07 | 0         |
| TRUE | C1 | Sample 26 | 15.55 | 7.66E+06 | 10000000  |
| TRUE | C2 | Sample 26 | 15.38 | 8.57E+06 | 10000000  |
| TRUE | C3 | Sample 27 | 16.4  | 4.36E+06 | 0         |
| TRUE | C4 | Sample 28 | 16.43 | 4.27E+06 | 0         |
| TRUE | C5 | Sample 29 | 17.25 | 2.49E+06 | 0         |
| TRUE | C6 | Sample 30 | 17.32 | 2.38E+06 | 0         |
| TRUE | D1 | Sample 38 | 18.74 | 9.34E+05 | 1000000   |
| TRUE | D2 | Sample 38 | 18.84 | 8.76E+05 | 1000000   |
| TRUE | D3 | Sample 39 | 19.91 | 4.32E+05 | 0         |
| TRUE | D4 | Sample 40 | 19.58 | 5.36E+05 | 0         |
| TRUE | D5 | Sample 41 | 20.51 | 2.90E+05 | 0         |
| TRUE | D6 | Sample 42 | 20.63 | 2.69E+05 | 0         |
| TRUE | E1 | Sample 50 | 22.09 | 1.03E+05 | 100000    |
| TRUE | E2 | Sample 50 | 21.97 | 1.11E+05 | 100000    |
| TRUE | F1 | Sample 62 | 25.58 | 1.02E+04 | 10000     |
| TRUE | F2 | Sample 62 | 25.36 | 1.18E+04 | 10000     |
| TRUE | G1 | Sample 73 | 28.66 | 1.34E+03 | 0         |
| TRUE | G2 | Sample 74 | 28.55 | 1.44E+03 | 0         |

## 6 NMR Spectra: Small Molecules



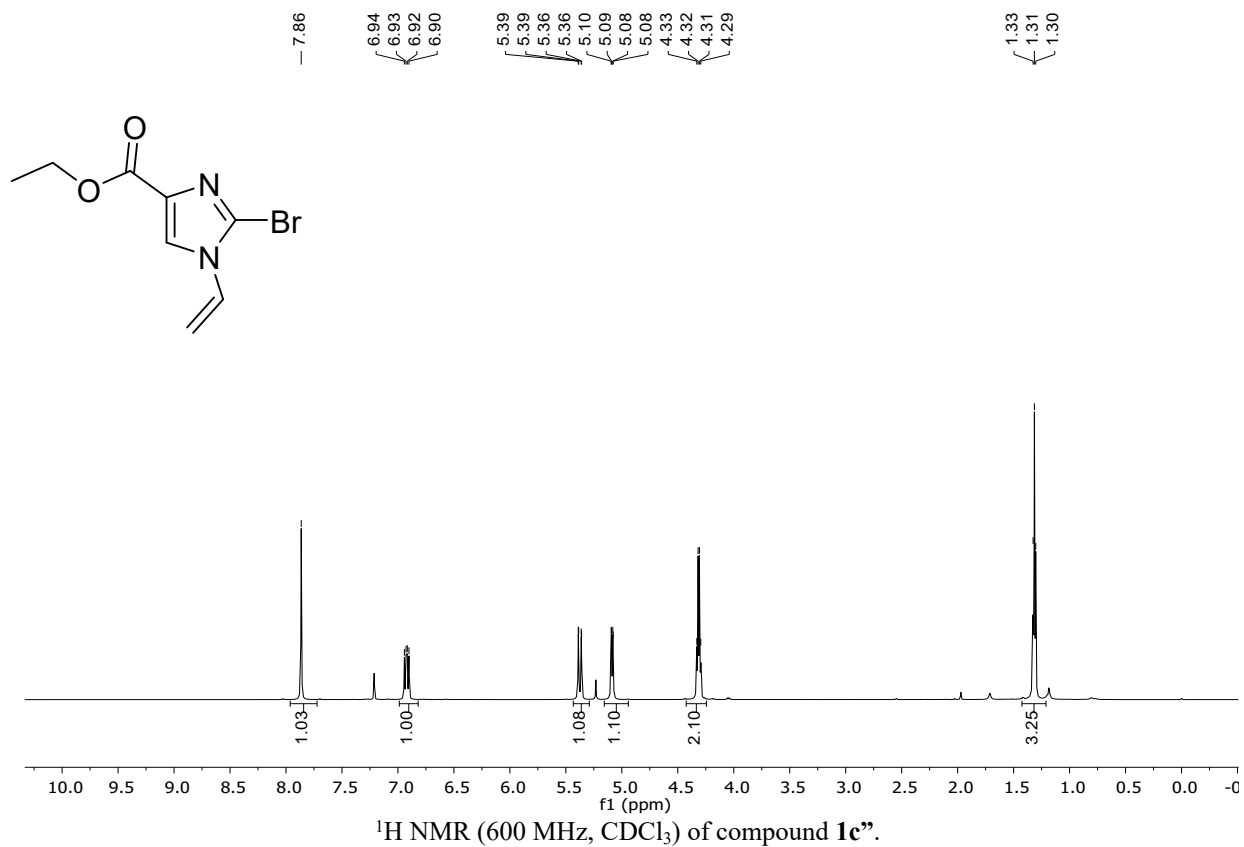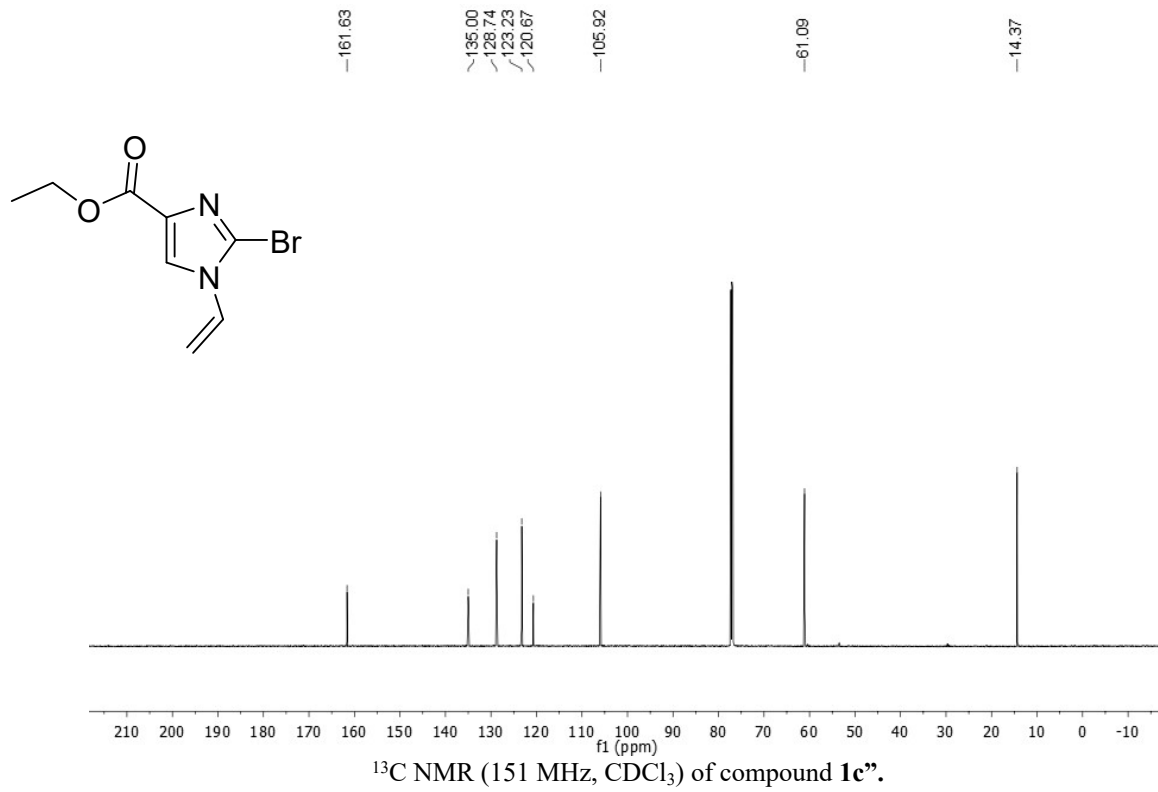

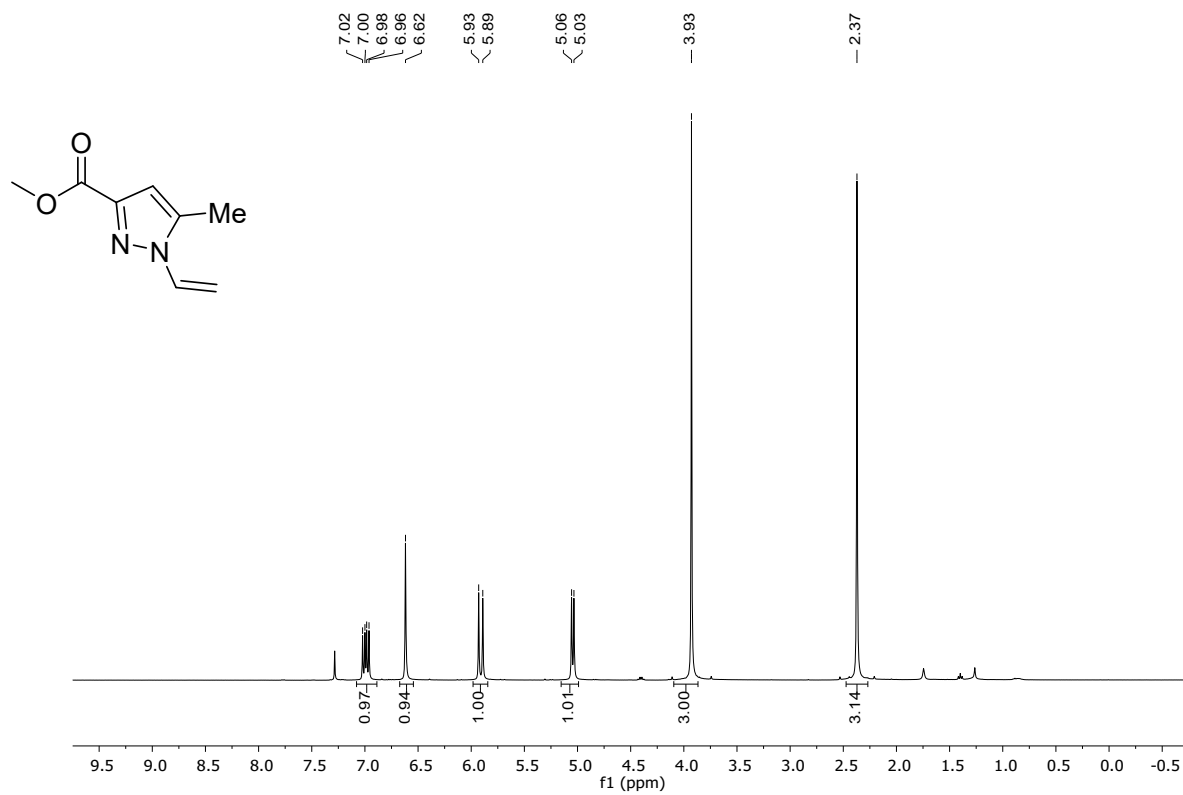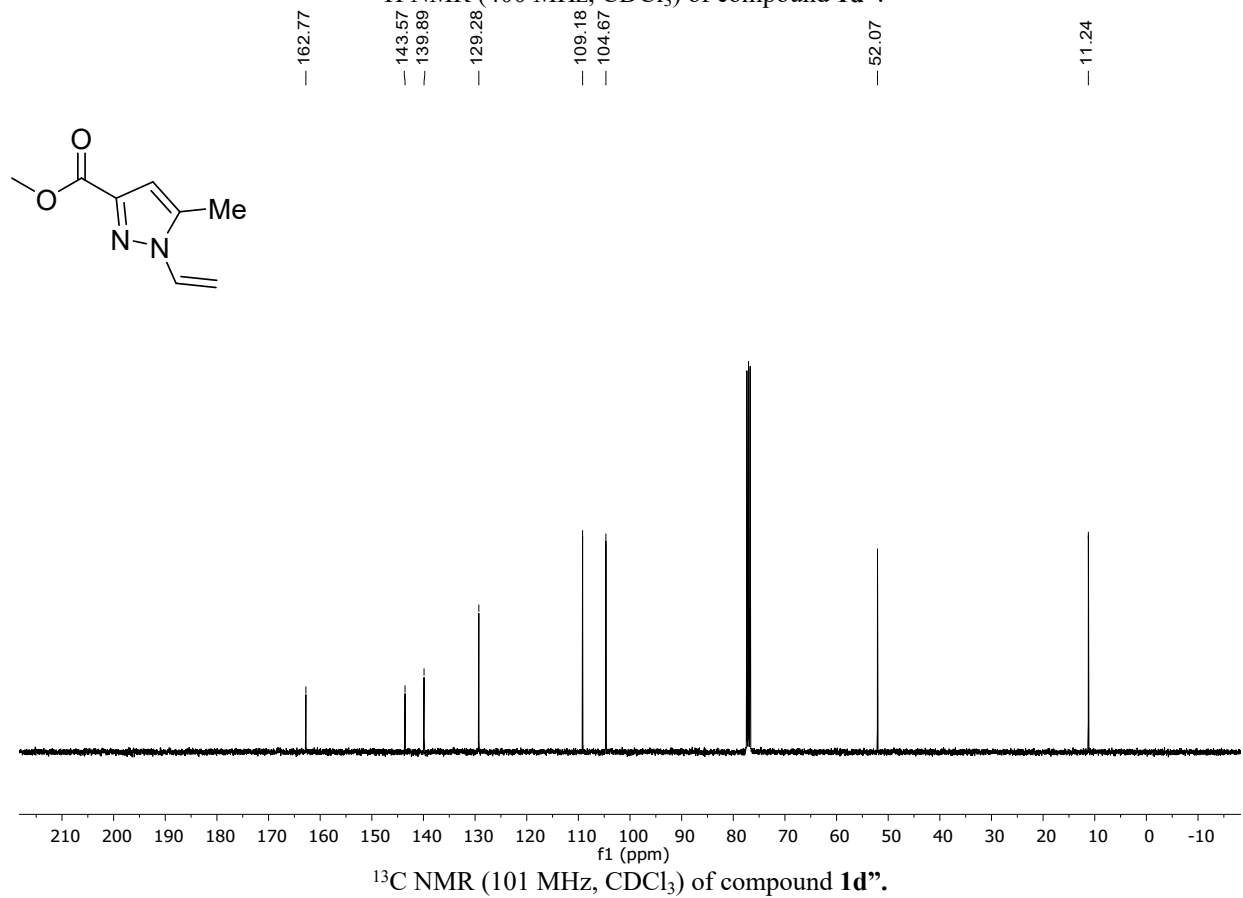

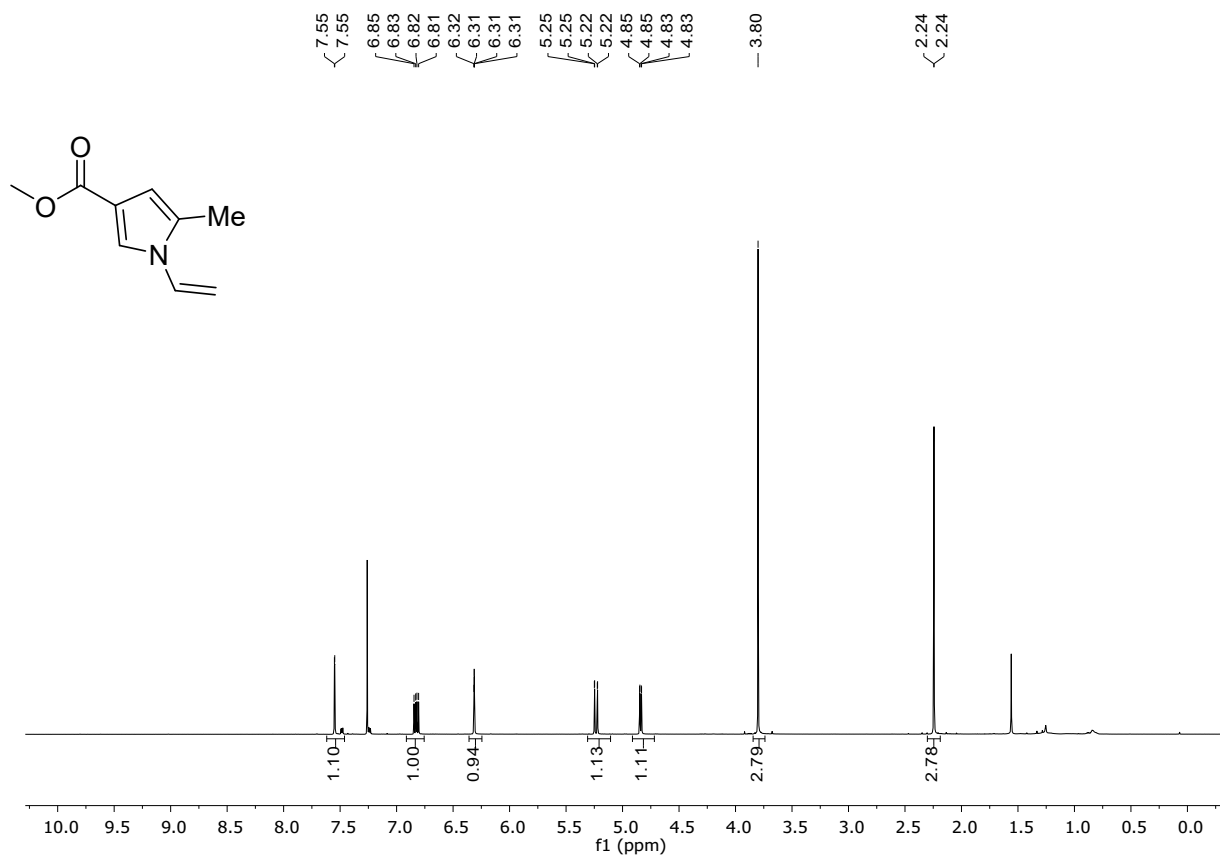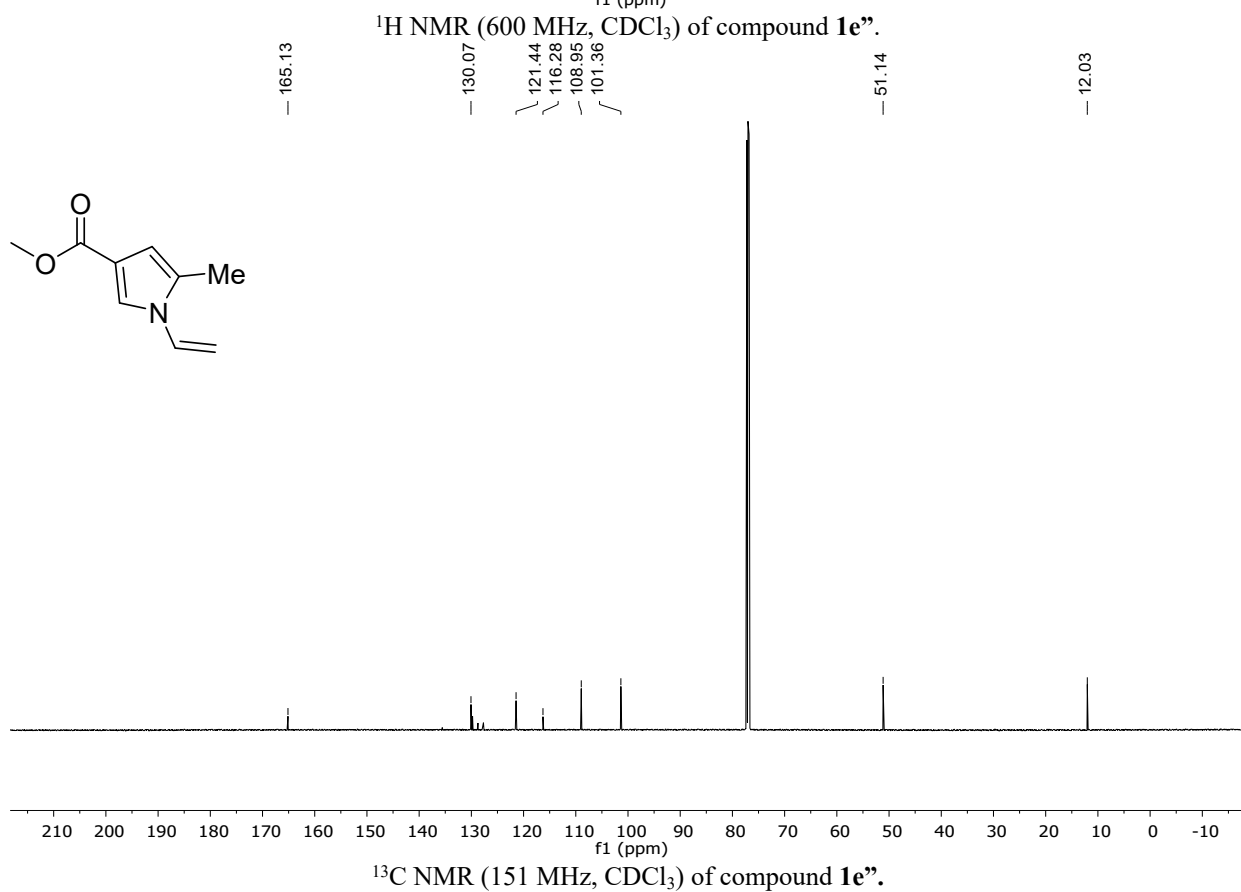

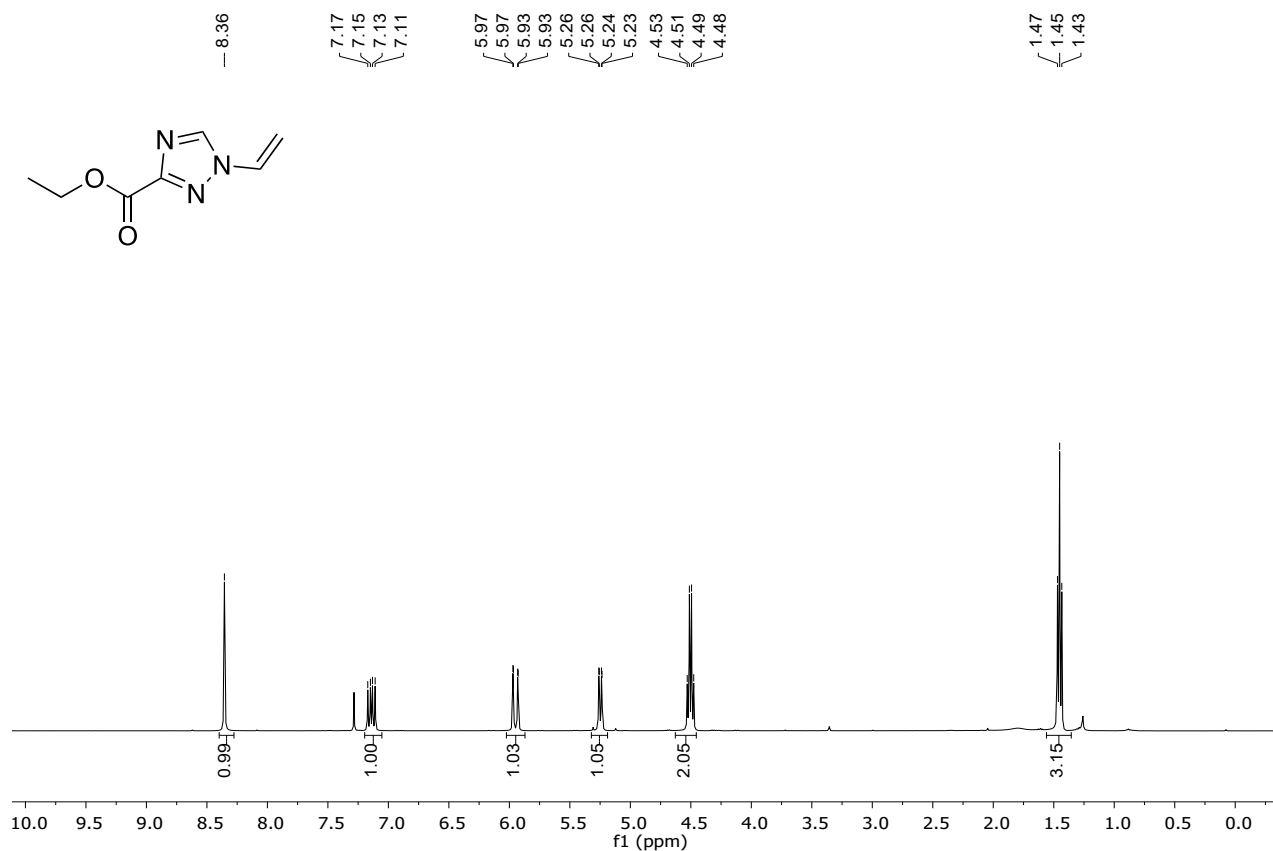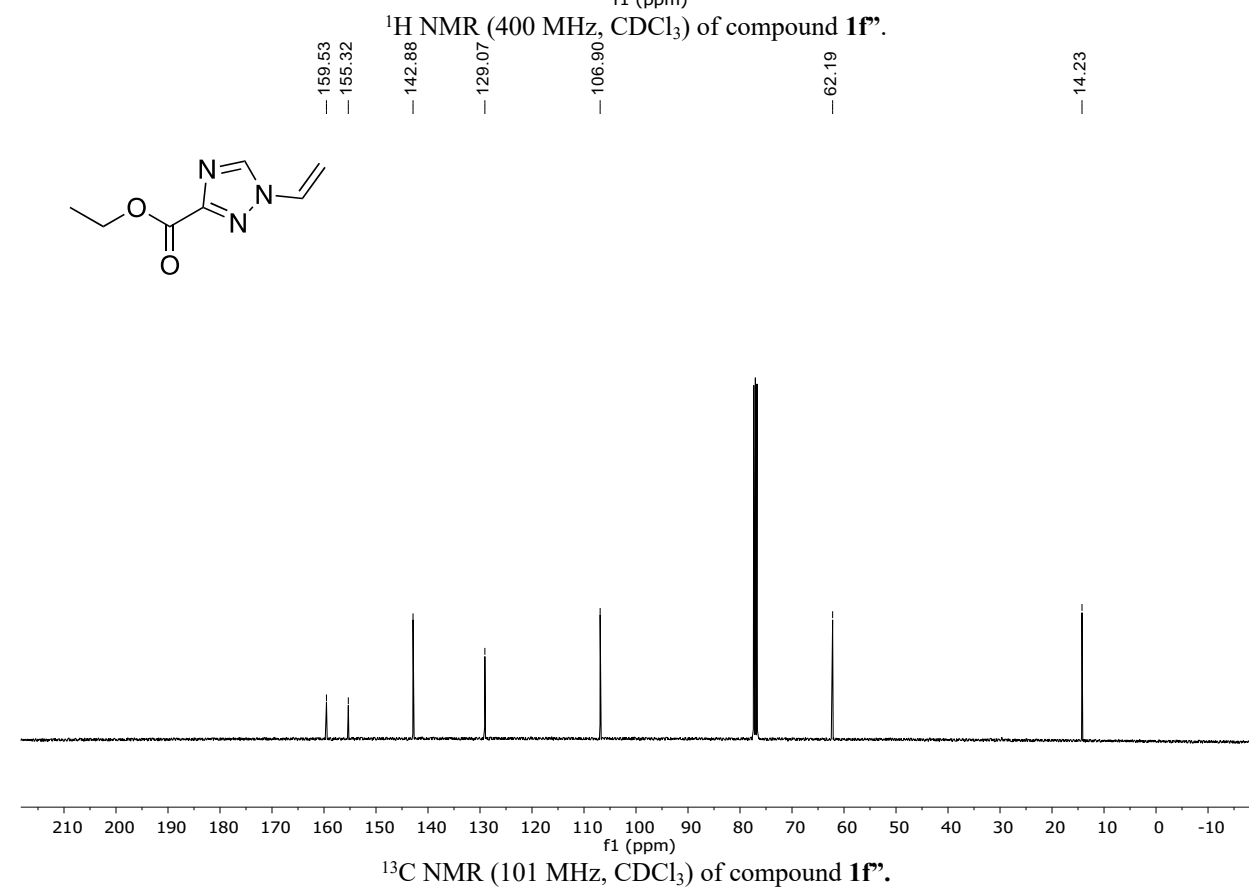

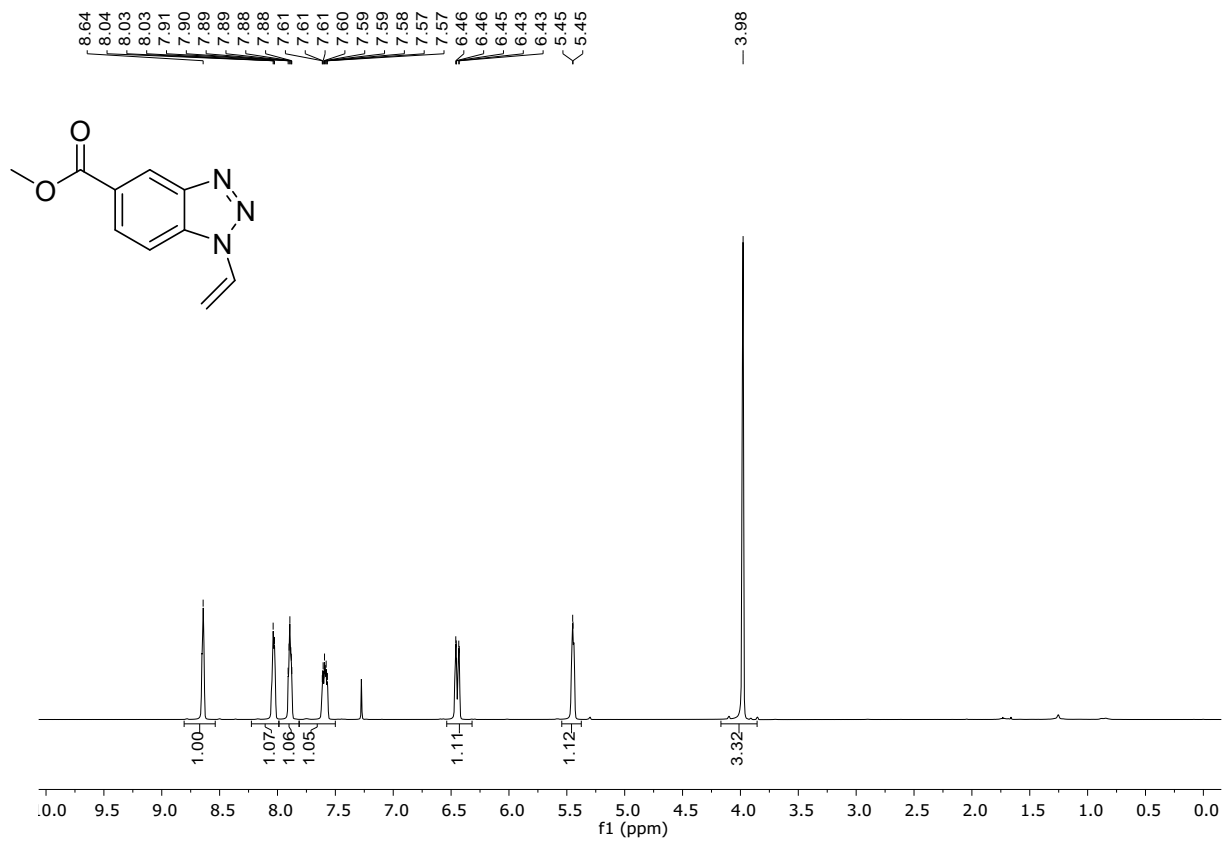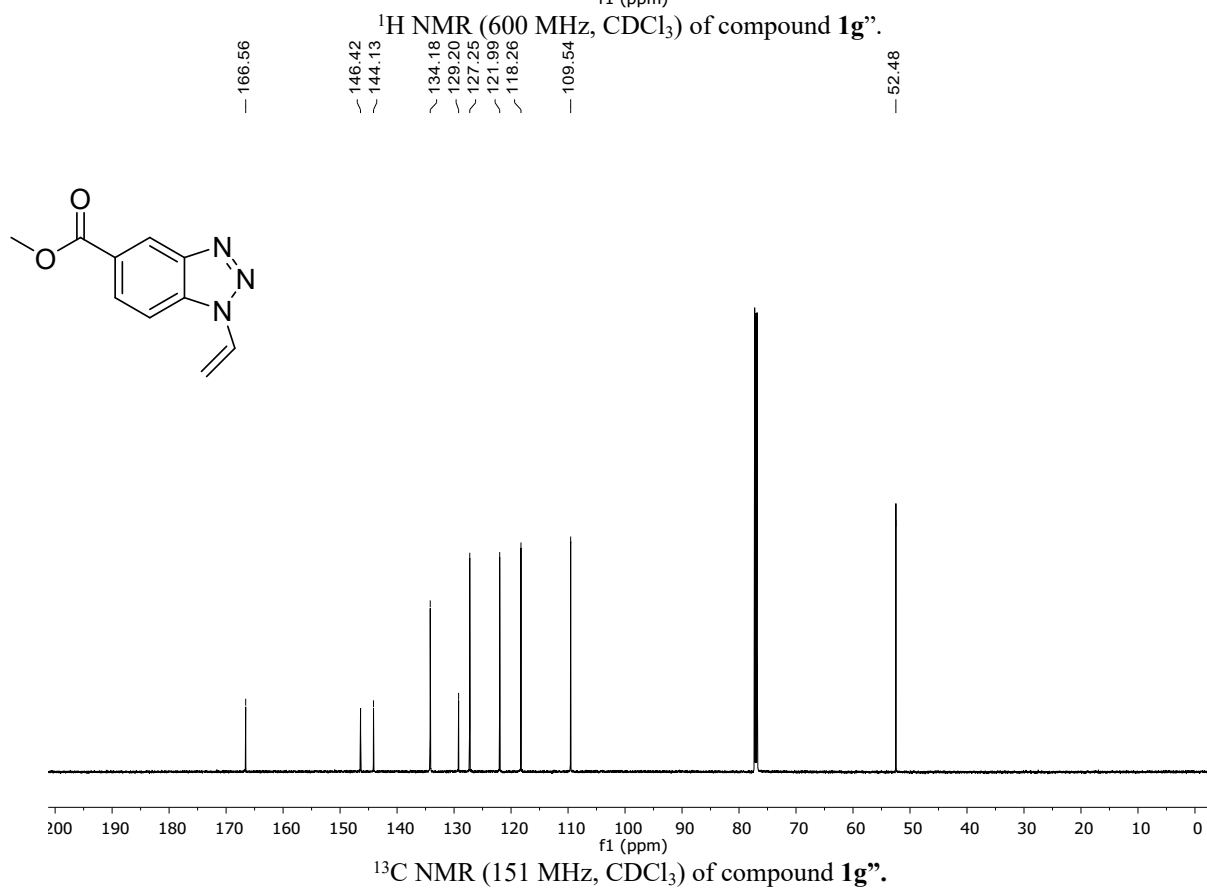

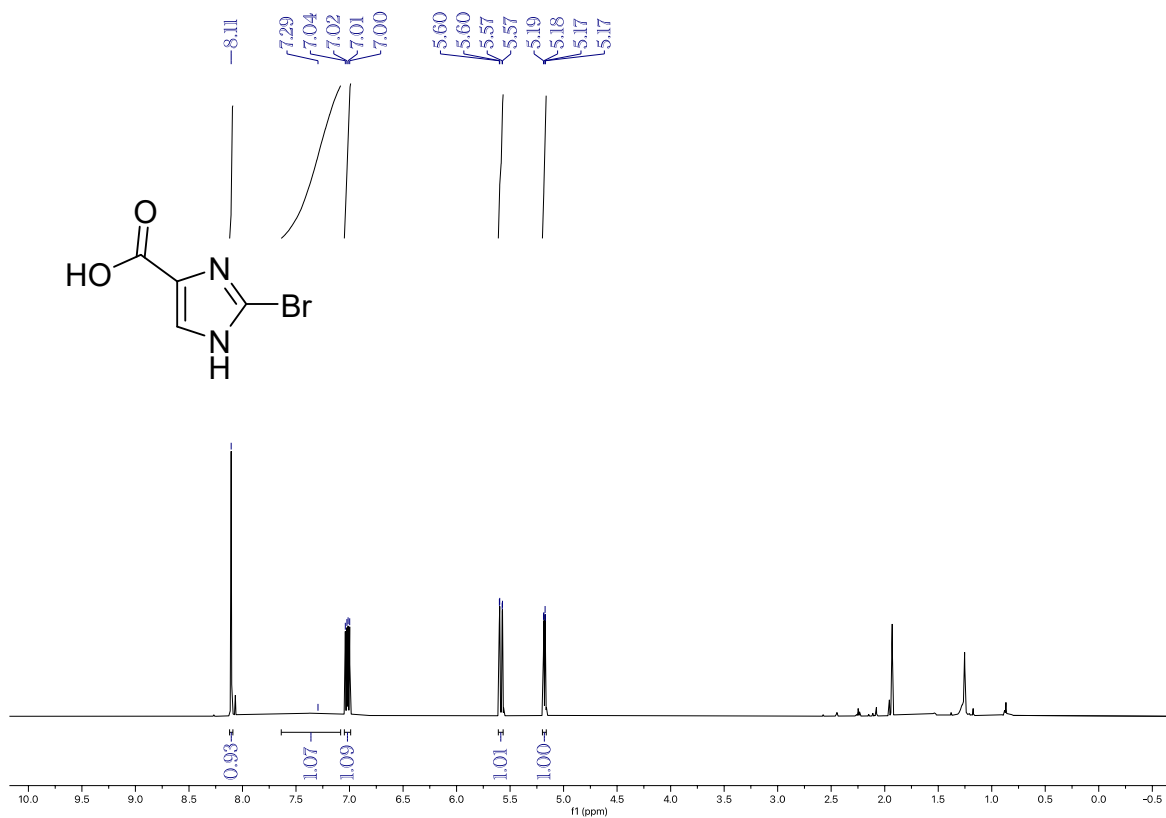

<sup>1</sup>H NMR (600 MHz, CDCl<sub>3</sub>) of compound **1c**.

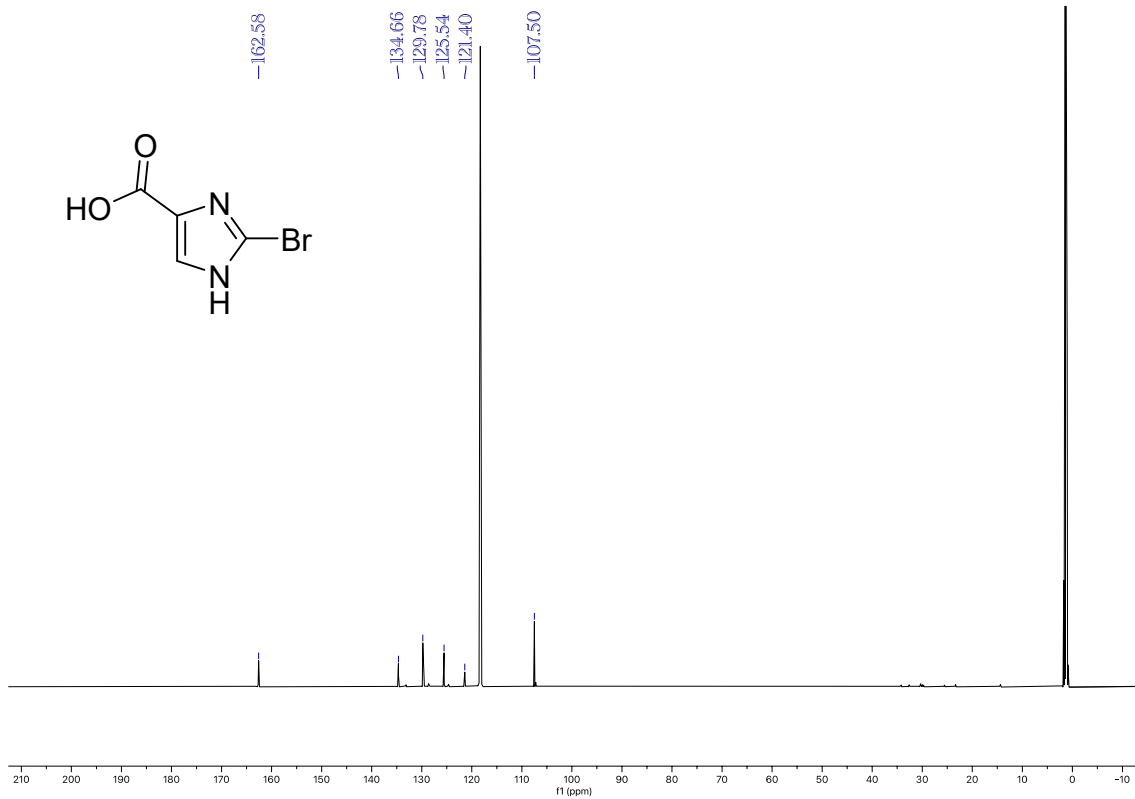

<sup>13</sup>C NMR (151 MHz, CDCl<sub>3</sub>) of compound **1c**.

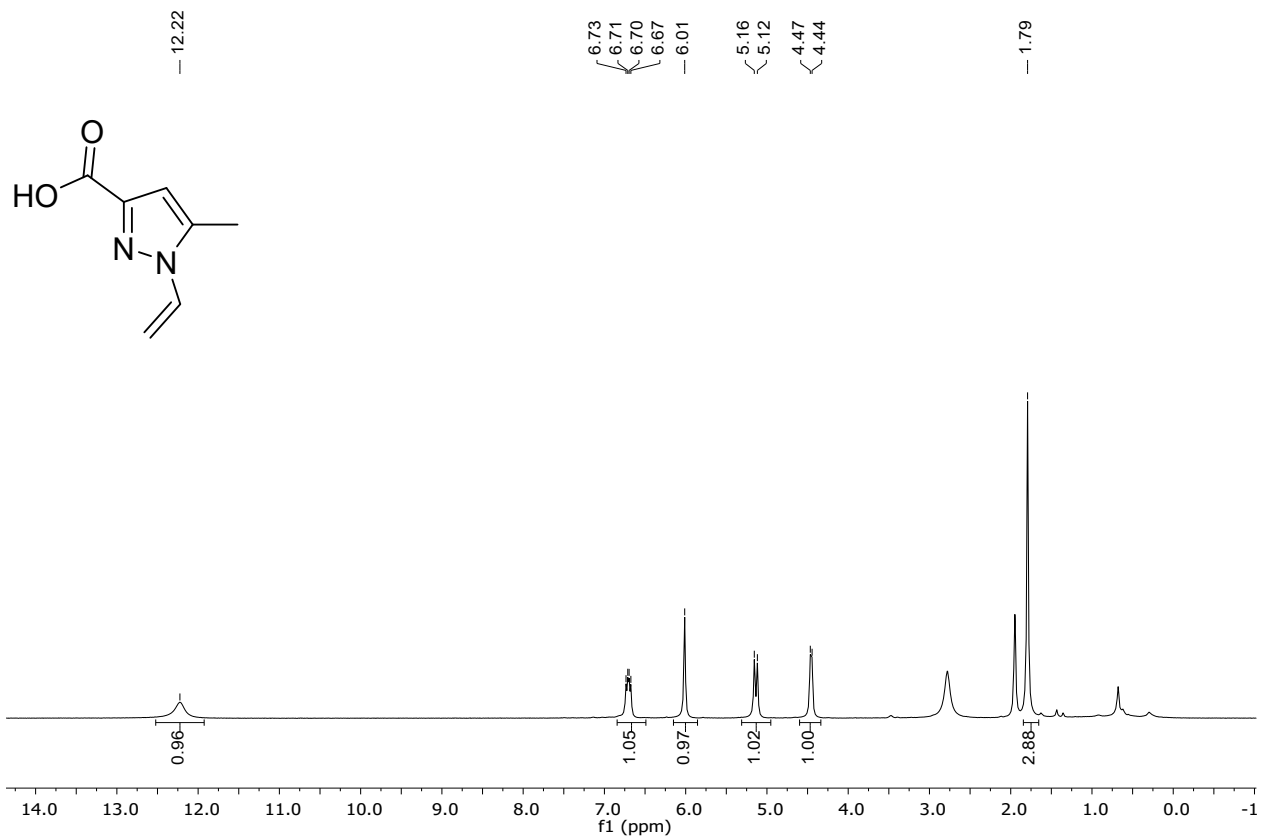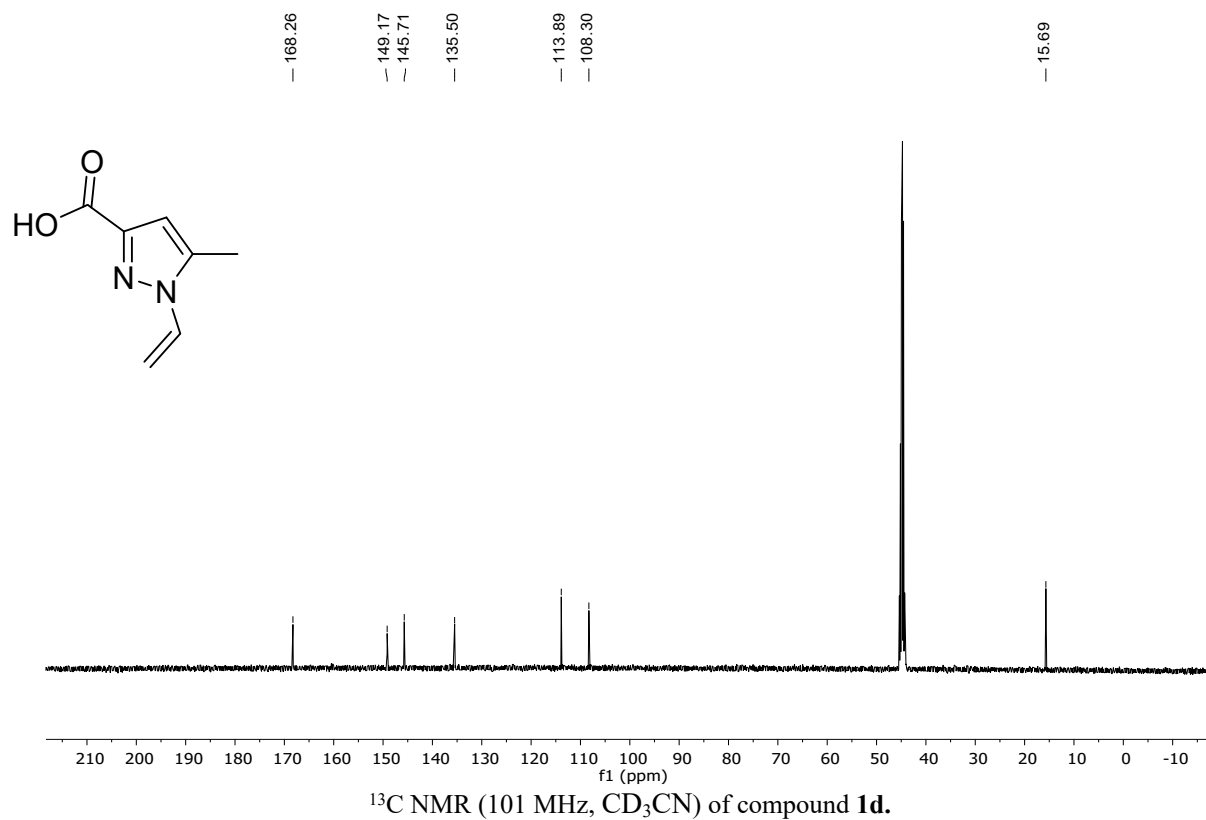

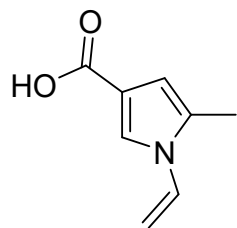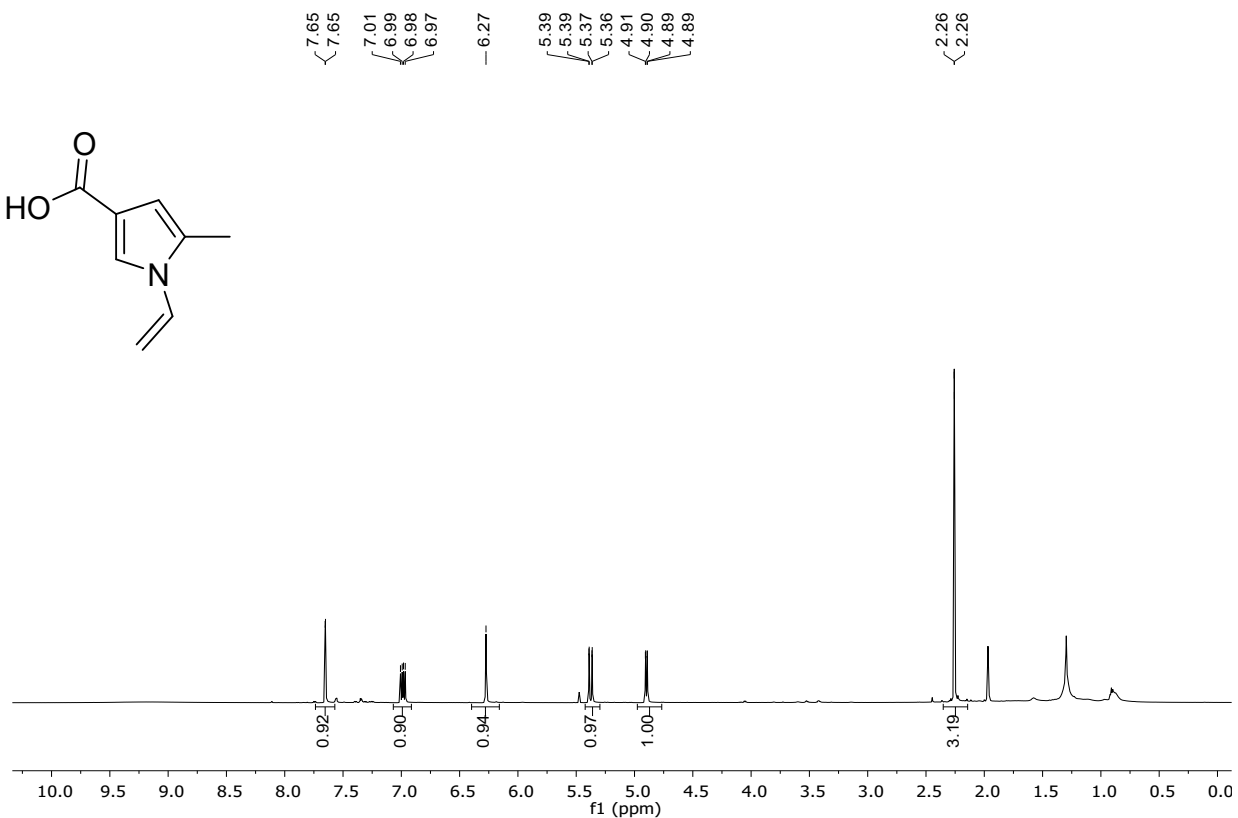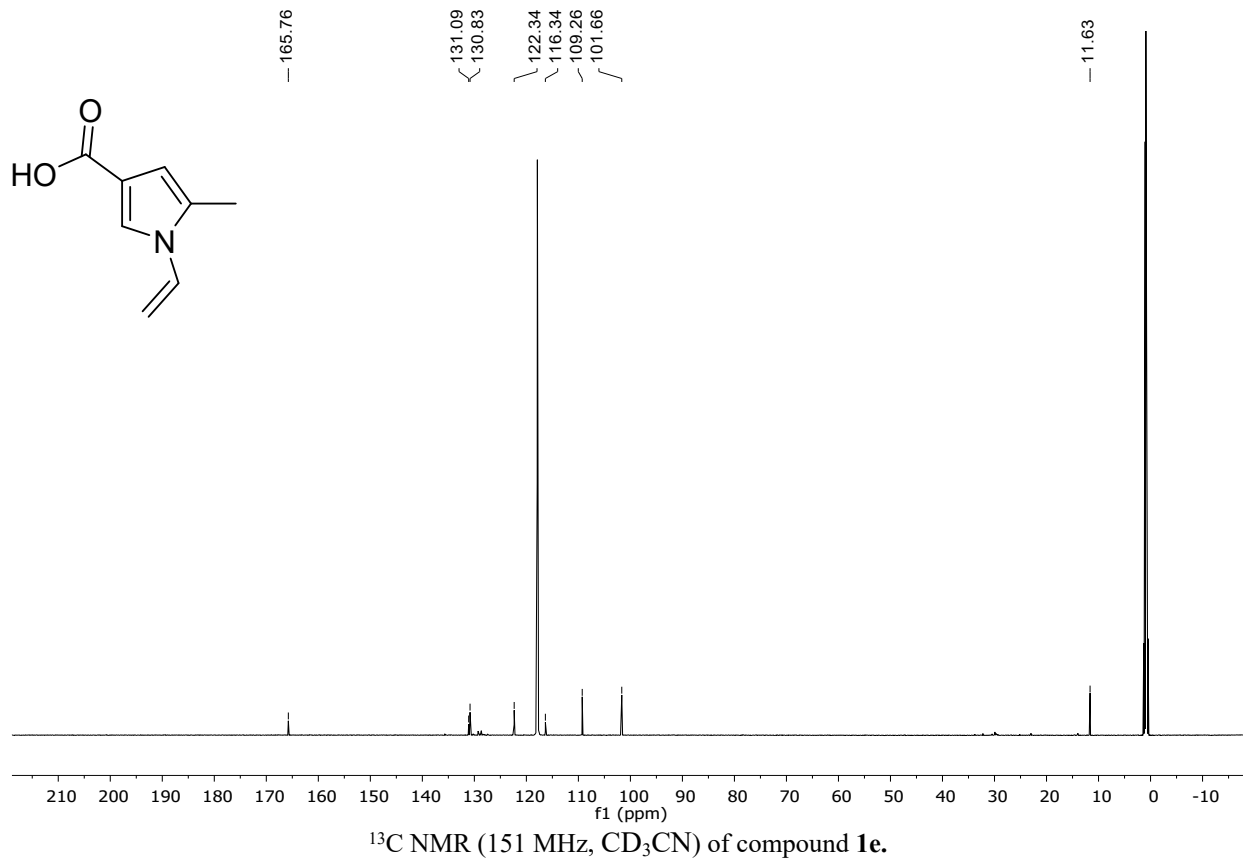



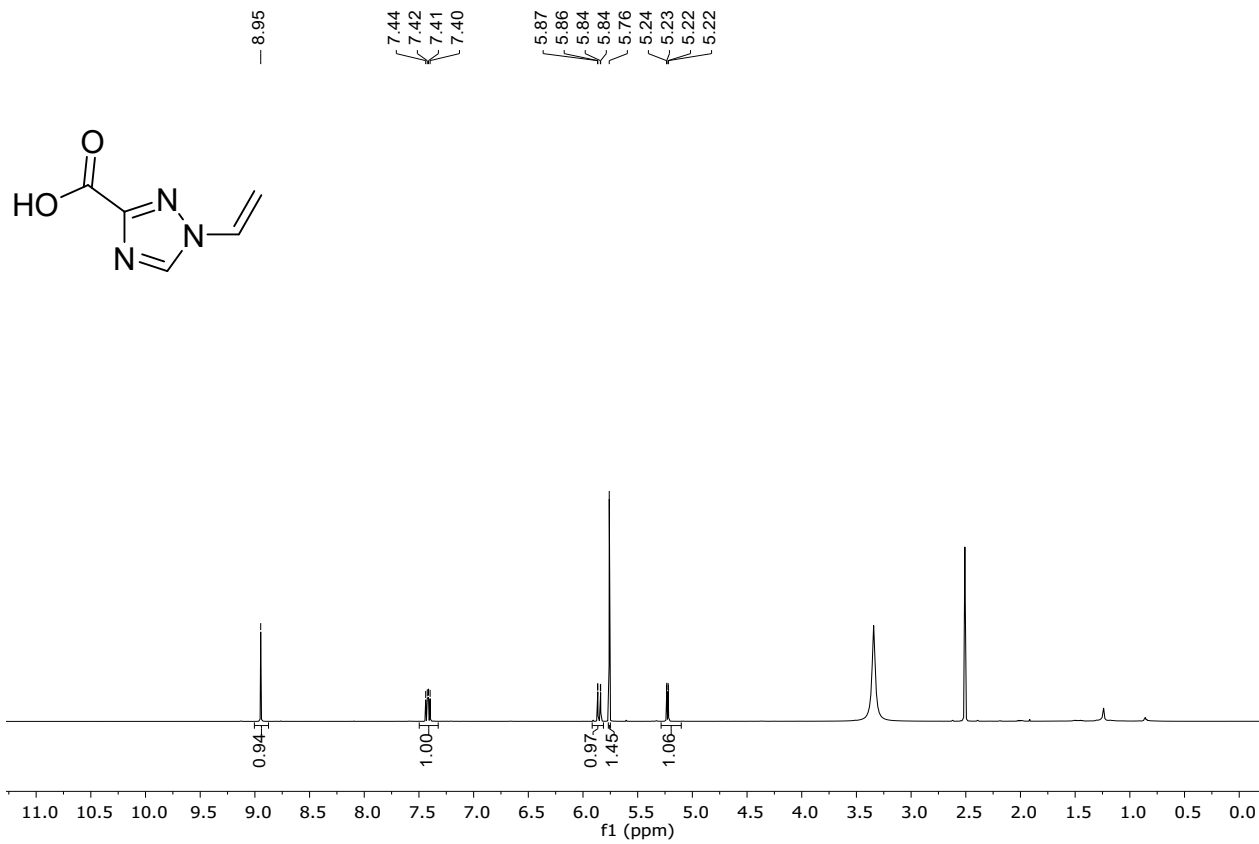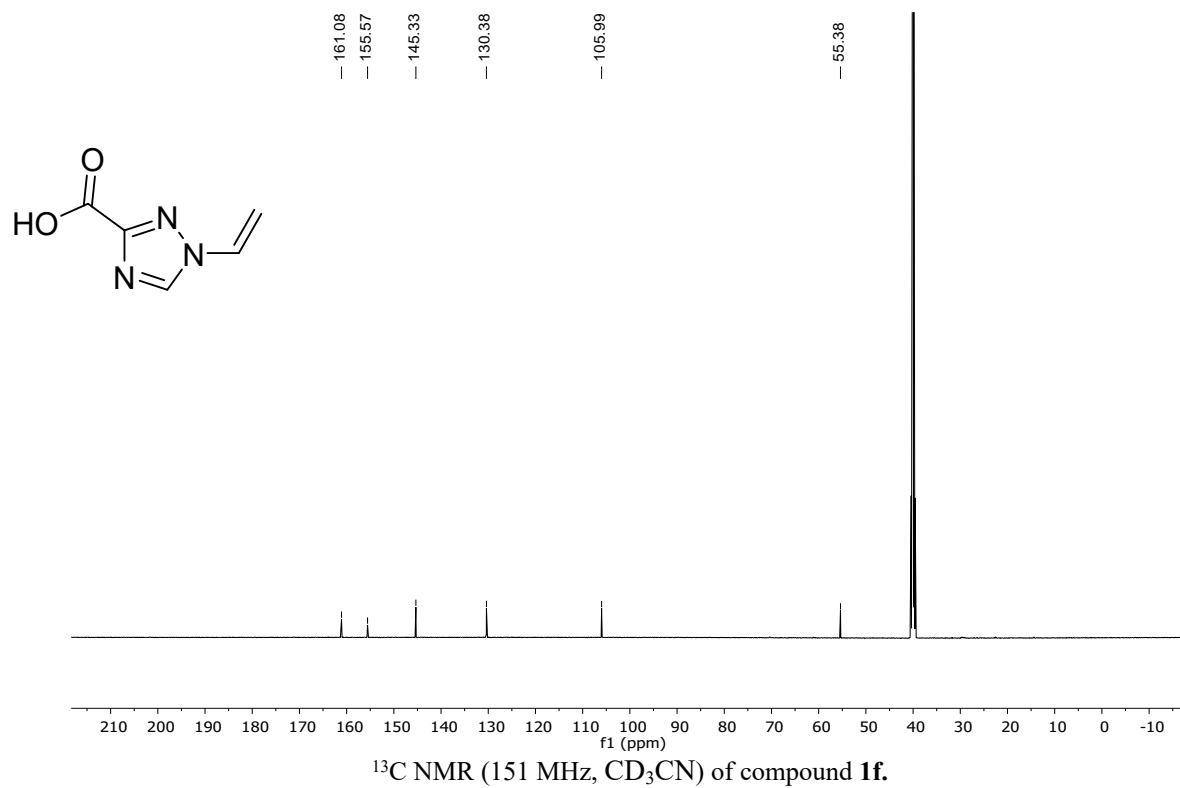

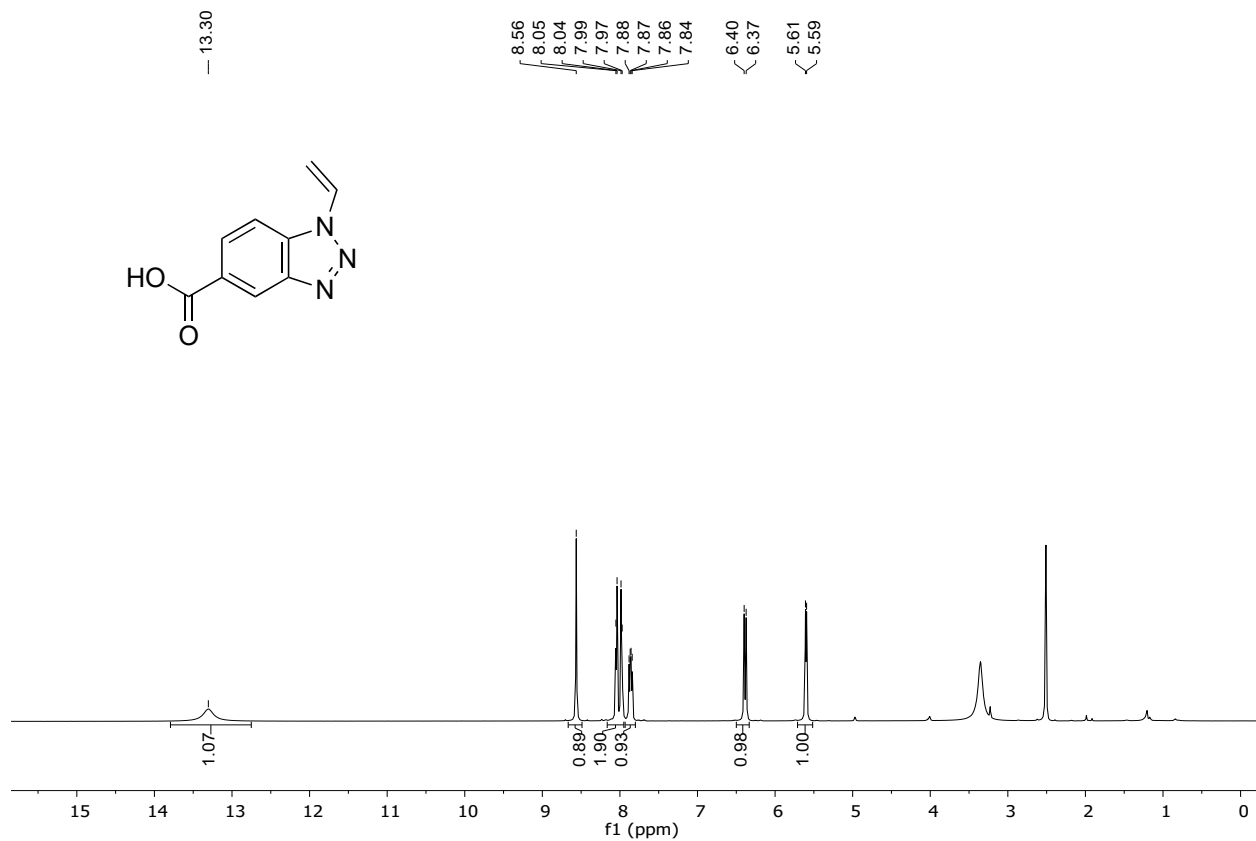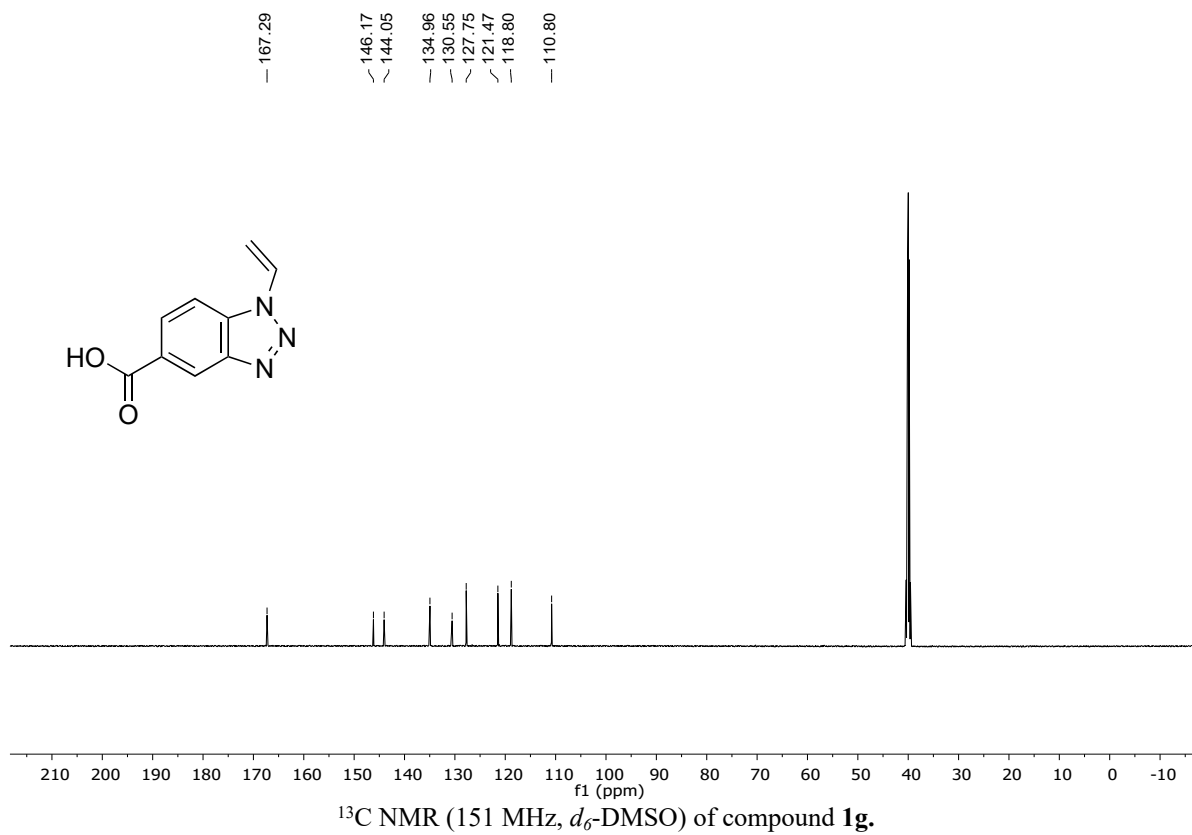

## 7 UPLC/MS Spectra

### 7.1 Functionalized DNA Headpieces

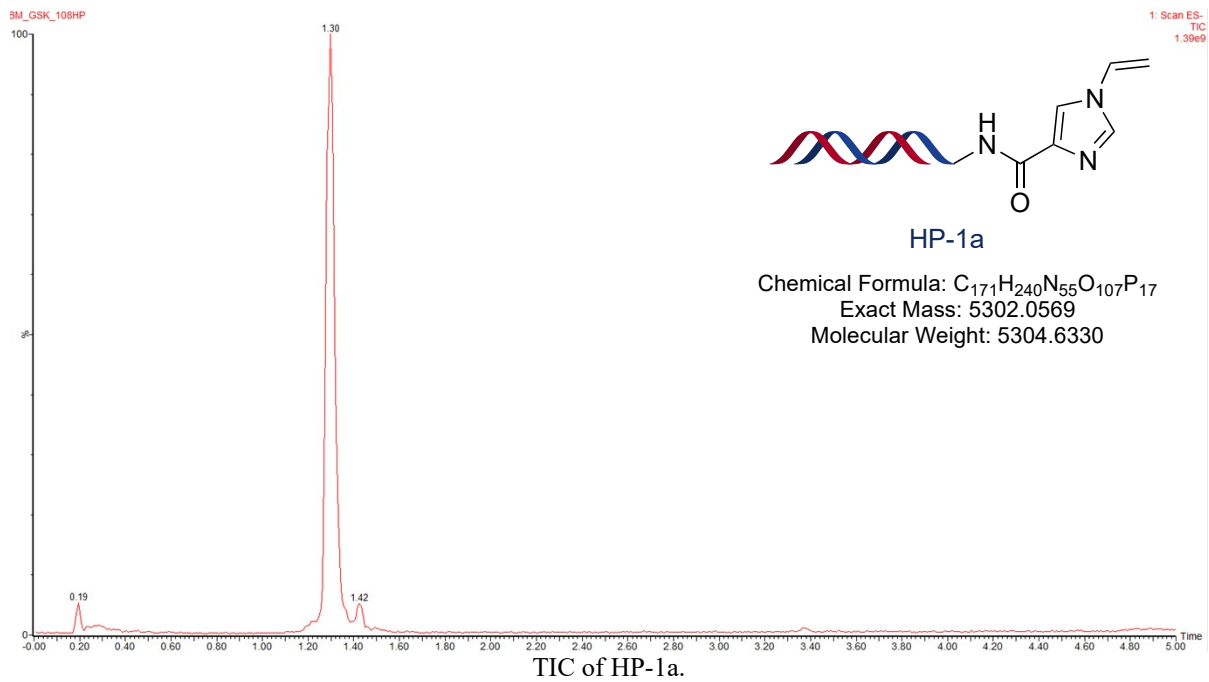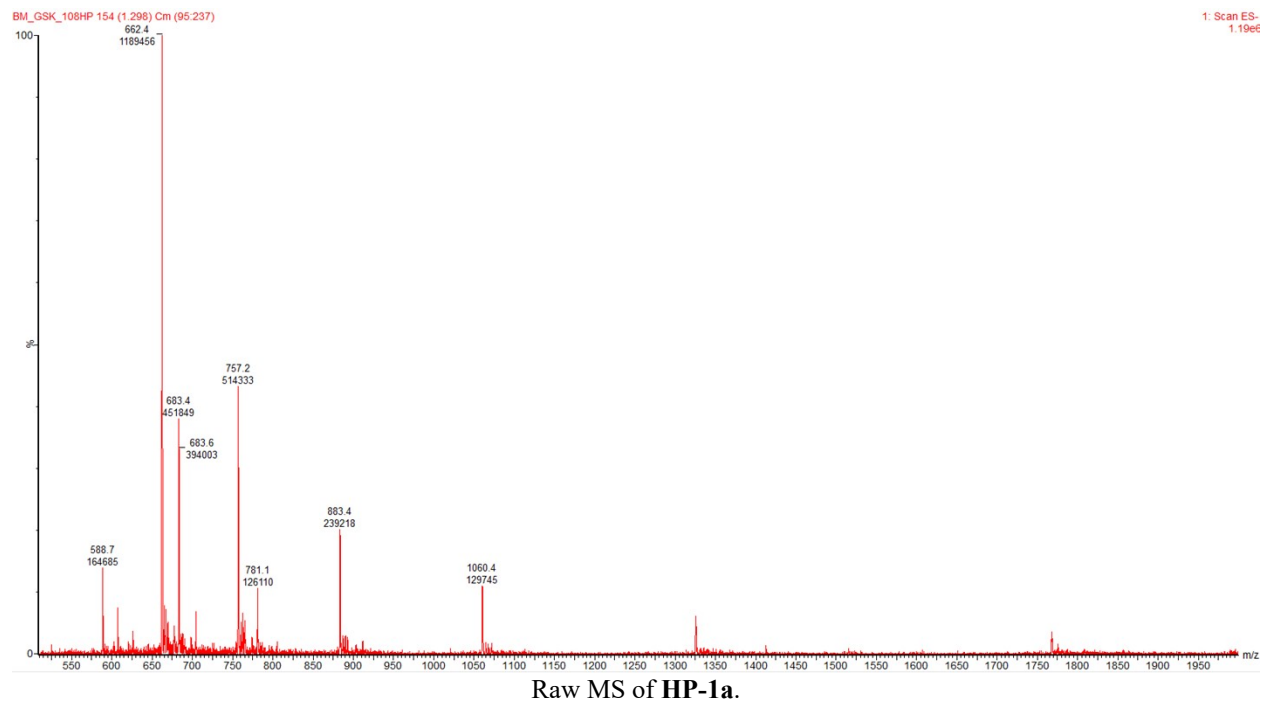

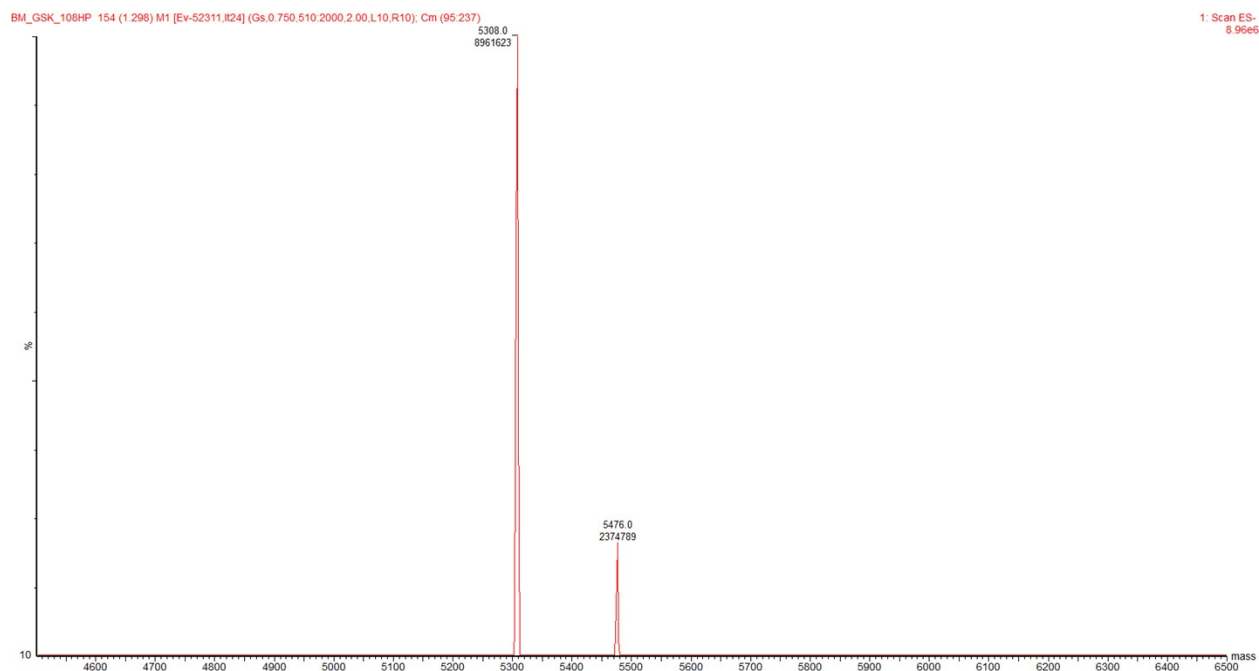

Deconvoluted MS of **HP-1a**. (mass signals >10% of peak height).

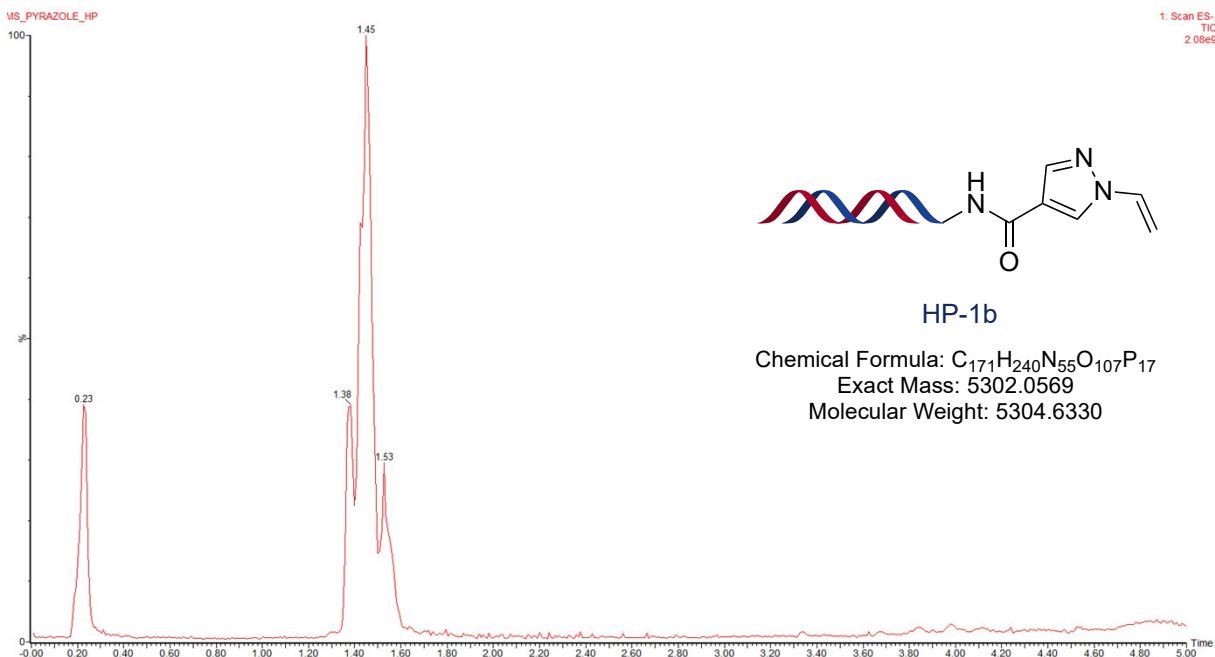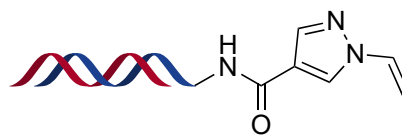

**HP-1b**

Chemical Formula:  $C_{171}H_{240}N_{55}O_{107}P_{17}$

Exact Mass: 5302.0569

Molecular Weight: 5304.6330

TIC of **HP-1b**.

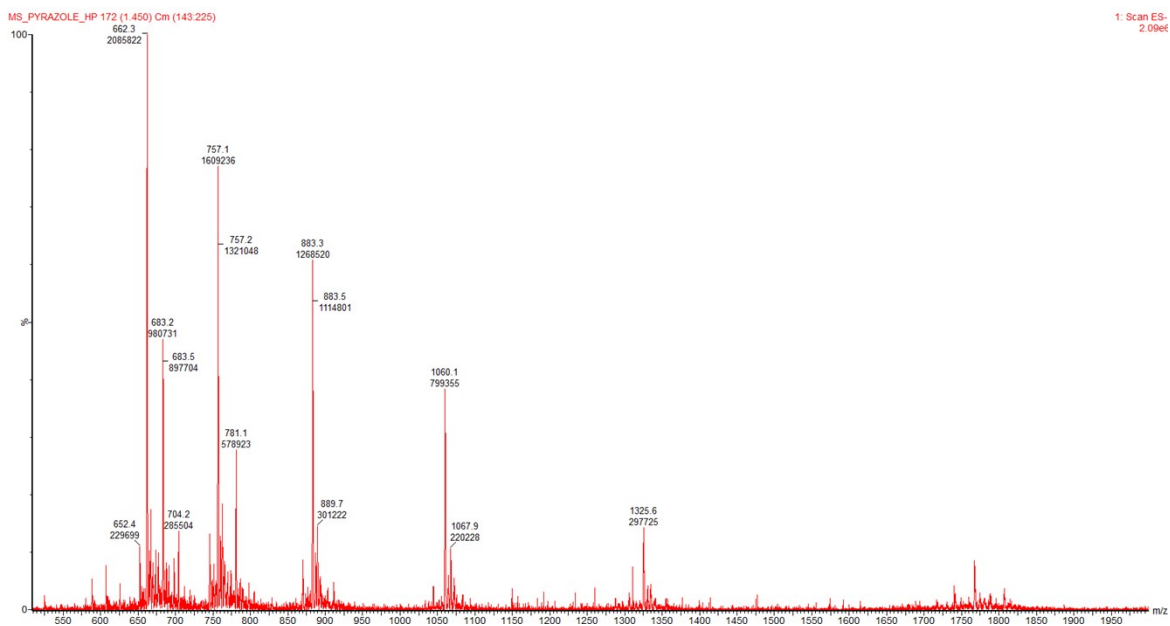

Raw MS of HP-1b.

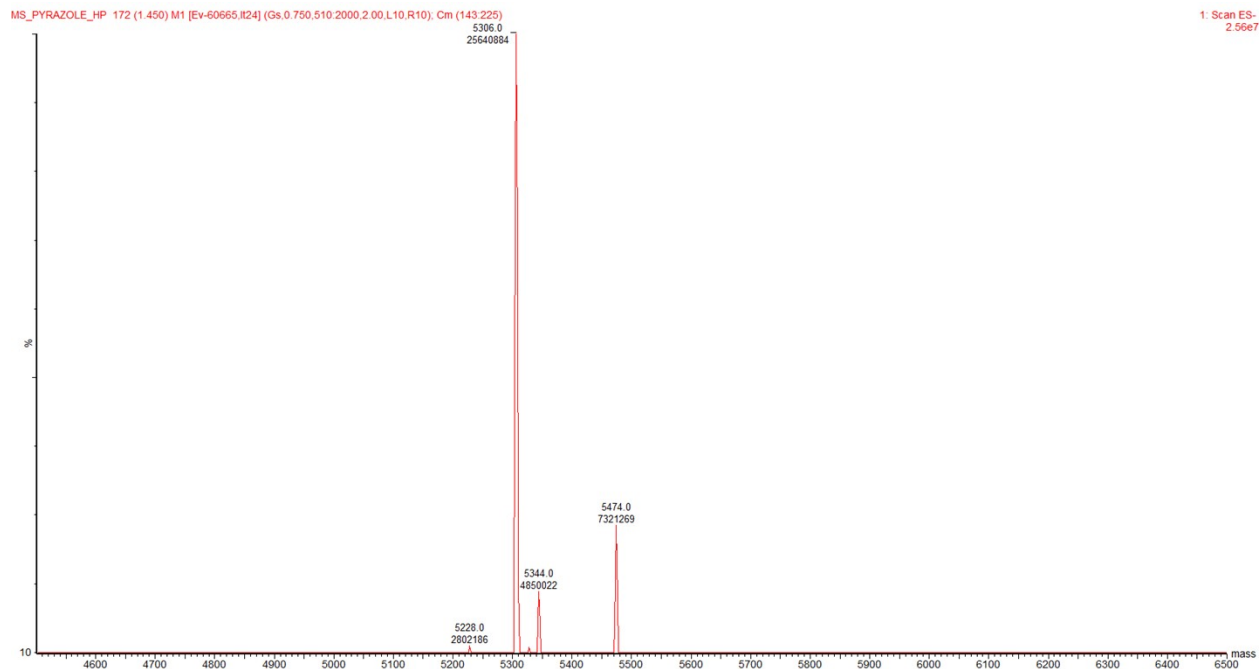

Deconvoluted MS of HP-1b. (mass signals >10% of peak height).

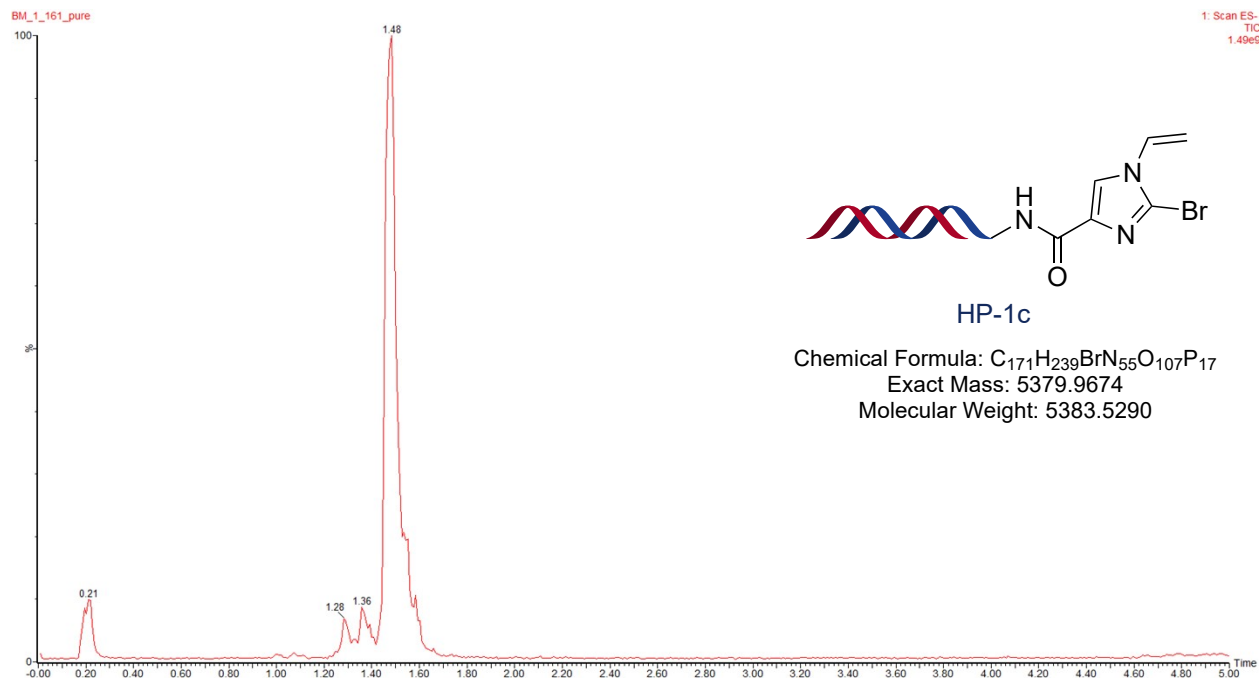

TIC of HP-1c.

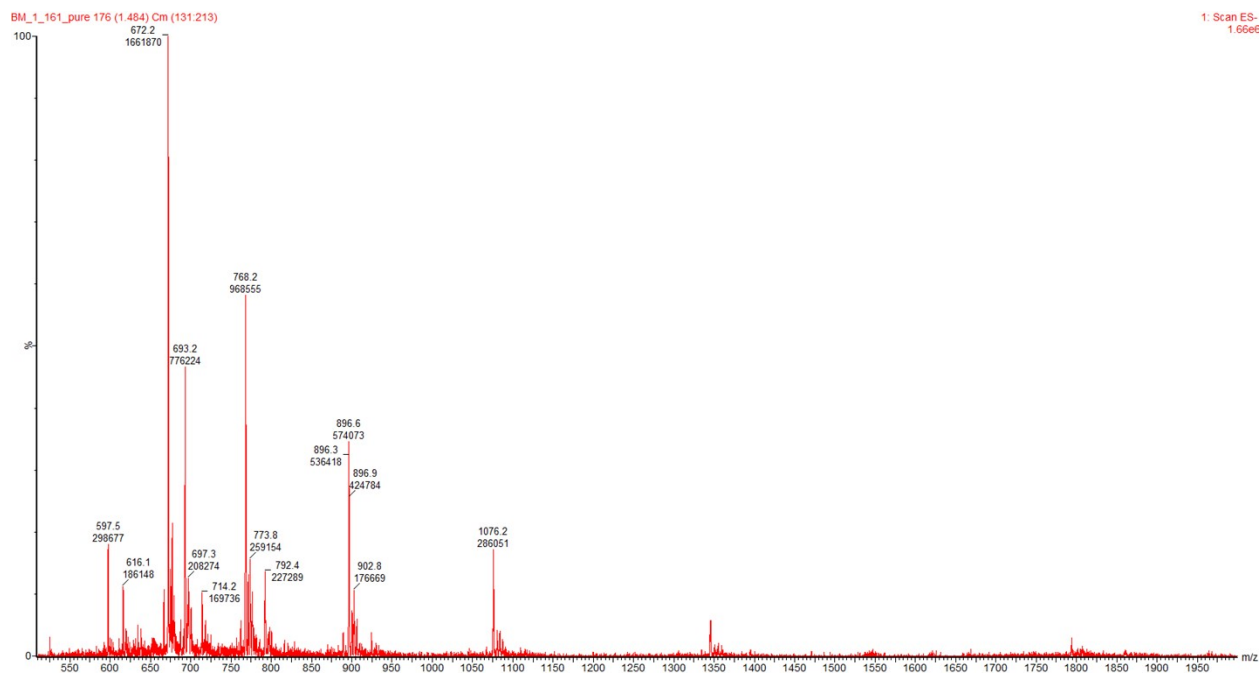

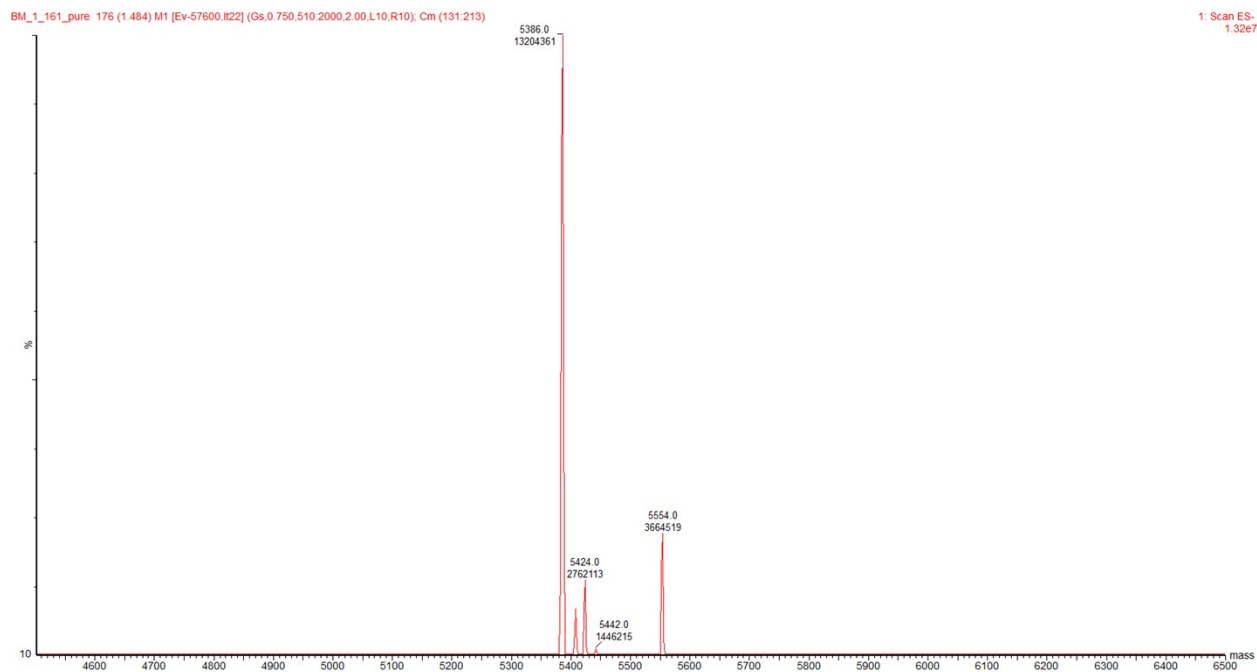

Deconvoluted MS of **HP-1c**. (mass signals >10% of peak height).

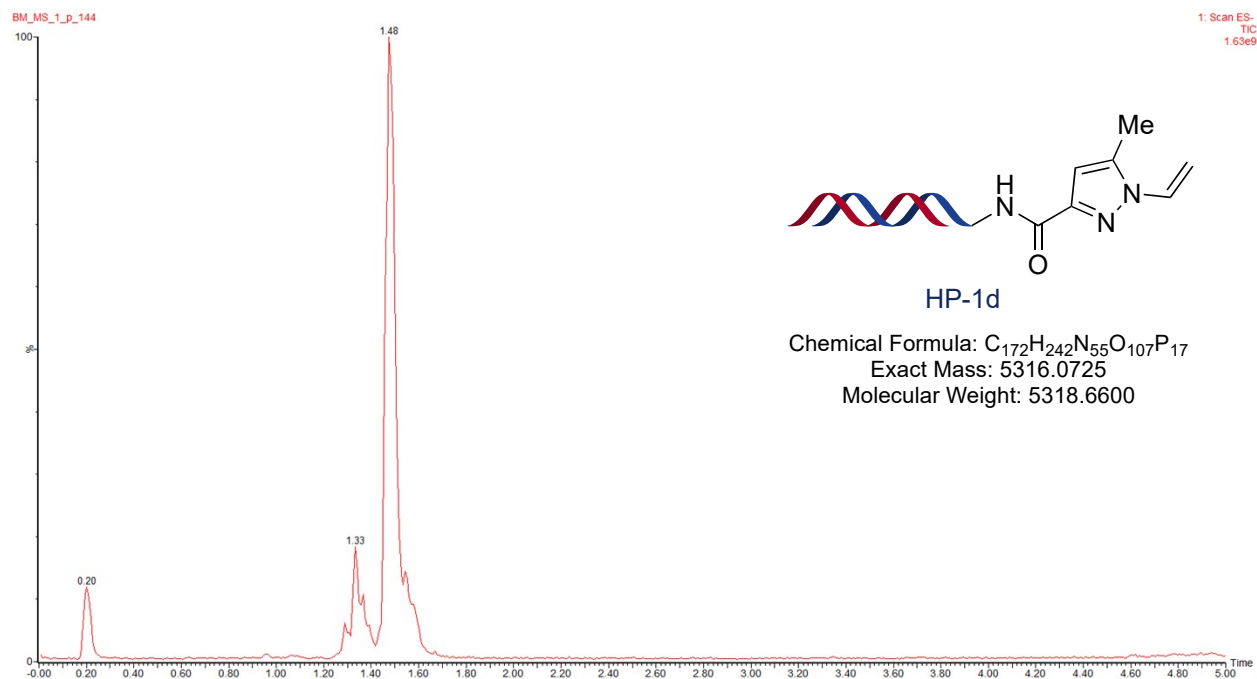

TIC of **HP-1d**.

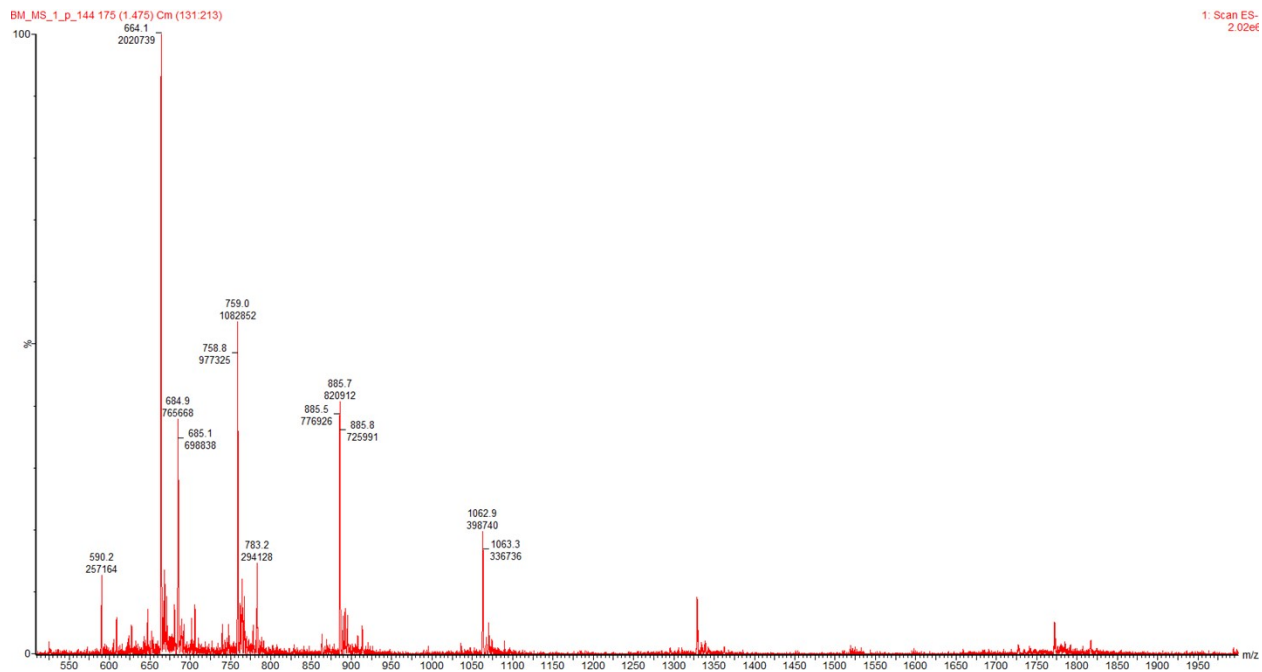

Raw MS of HP-1d.

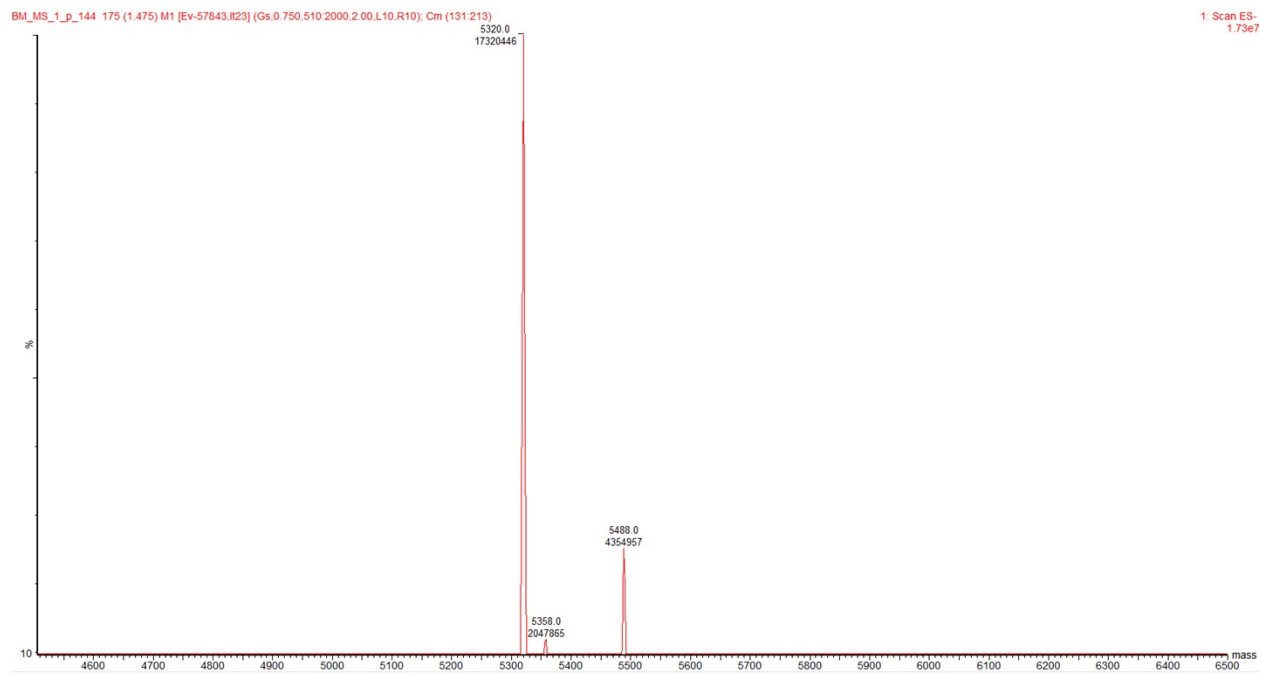

Deconvoluted MS of HP-1d. (mass signals >10% of peak height).



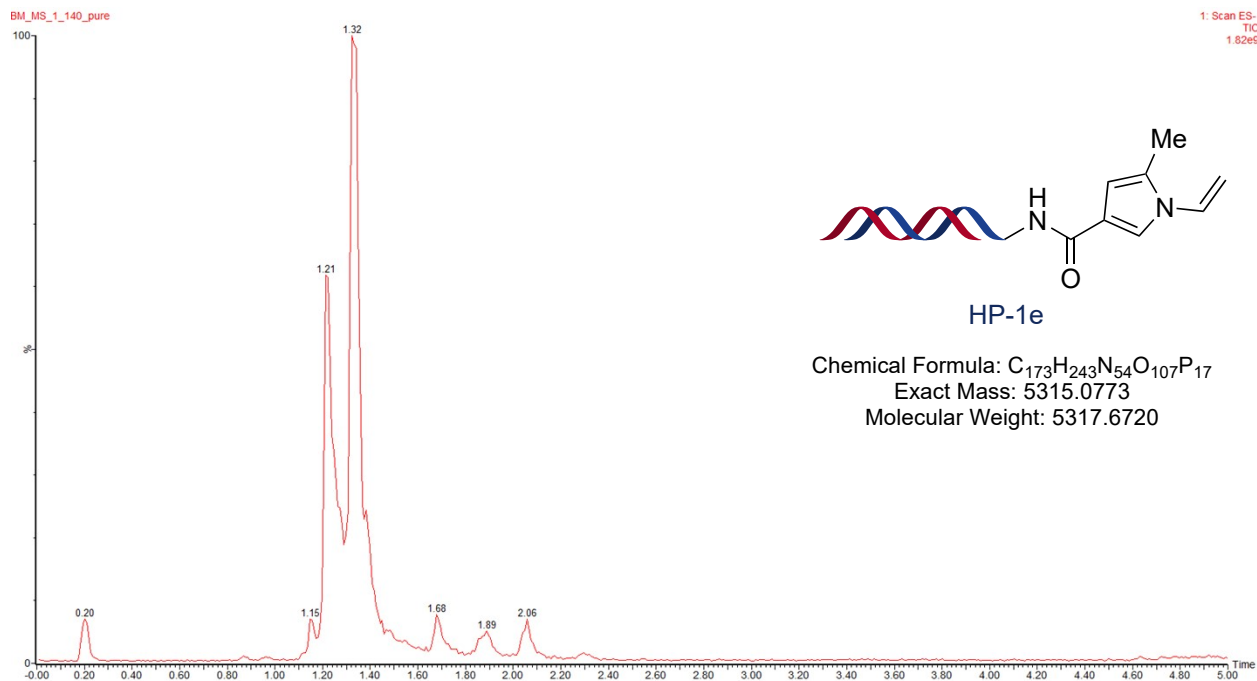

TIC of HP-1e.

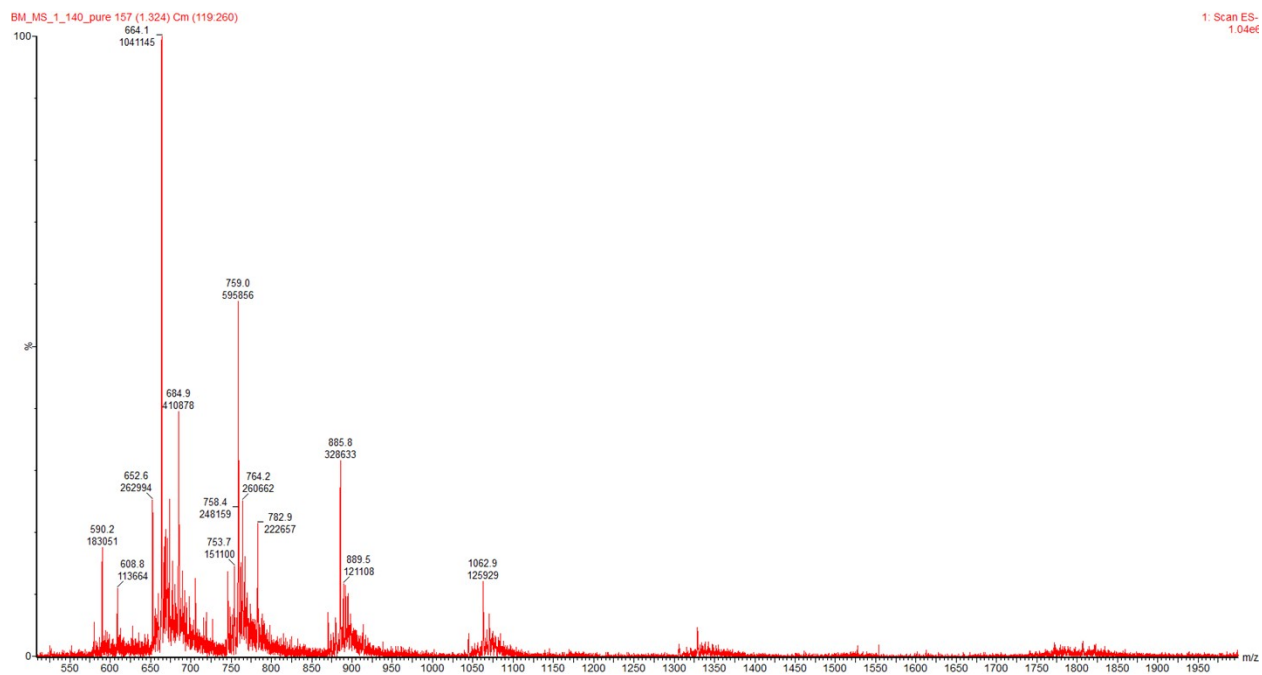

Raw MS of HP-1e.

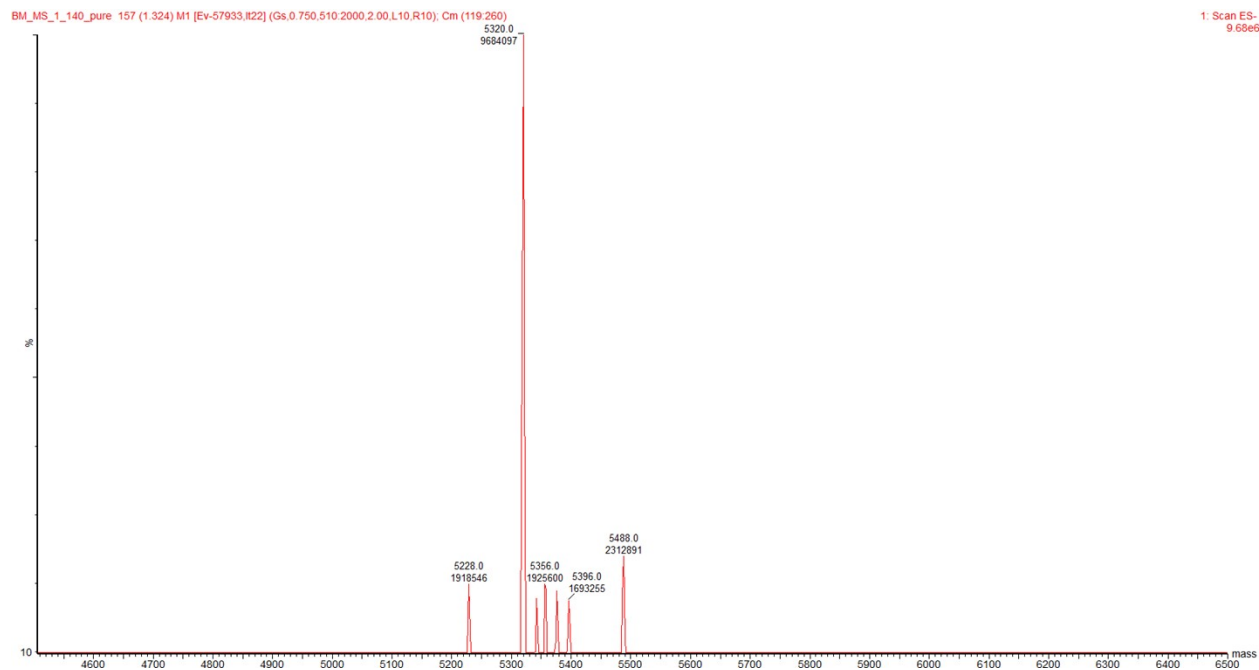

Deconvoluted MS of HP-1e. (mass signals >10% of peak height).

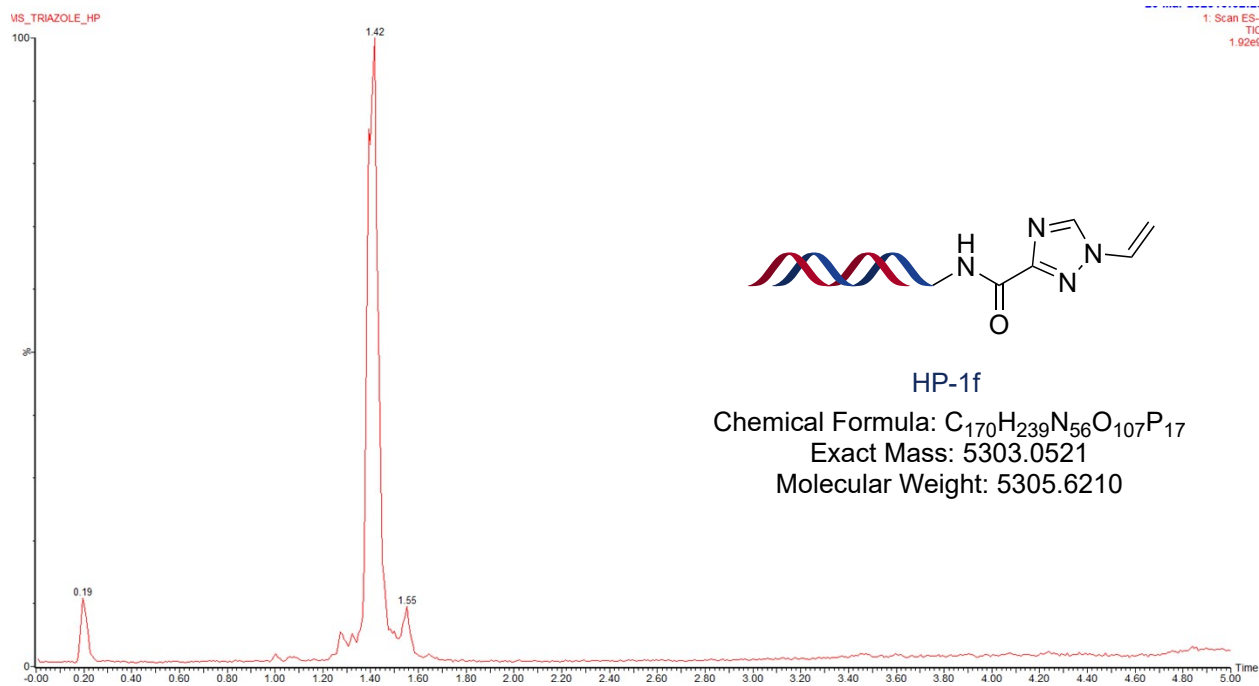

TIC of HP-1f.

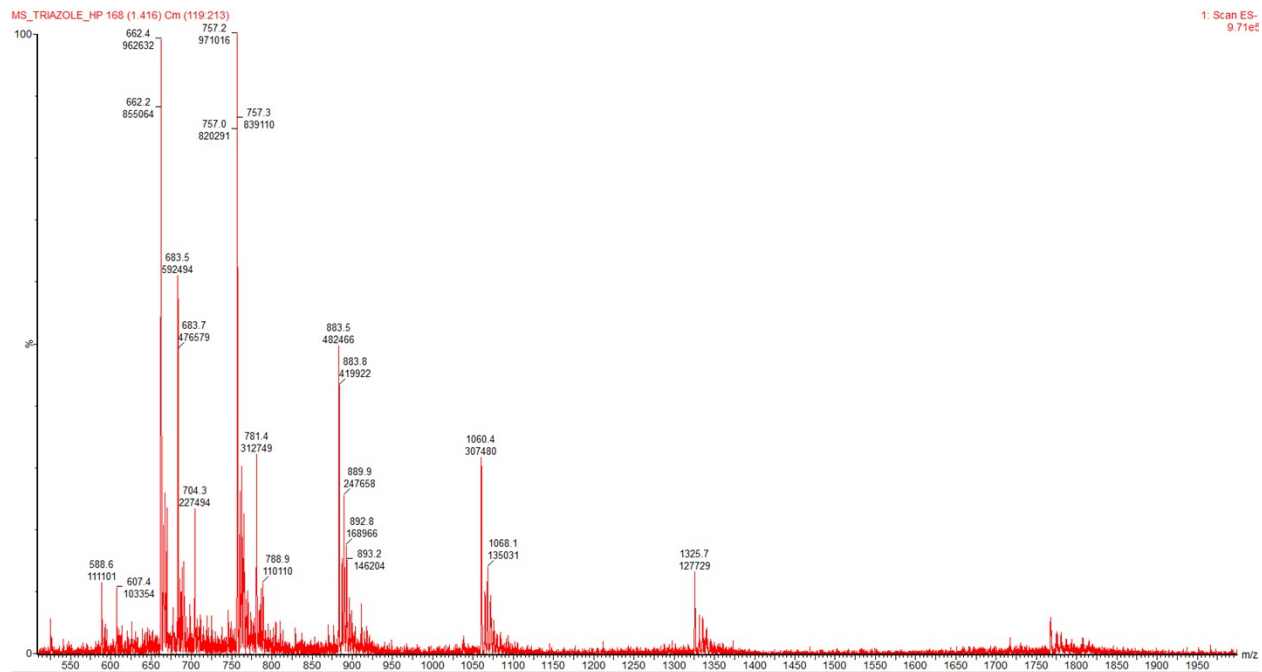

Raw MS of **HP-1f**.

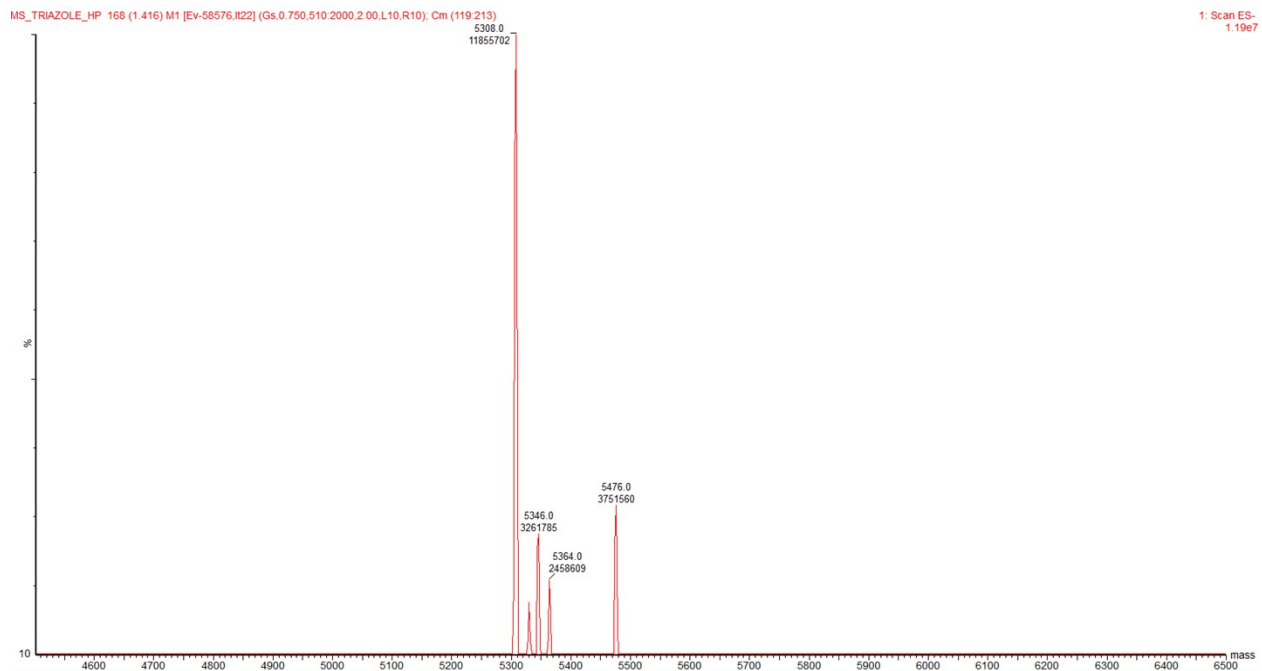

Deconvoluted MS of **HP-1f**. (mass signals >10% of peak height).

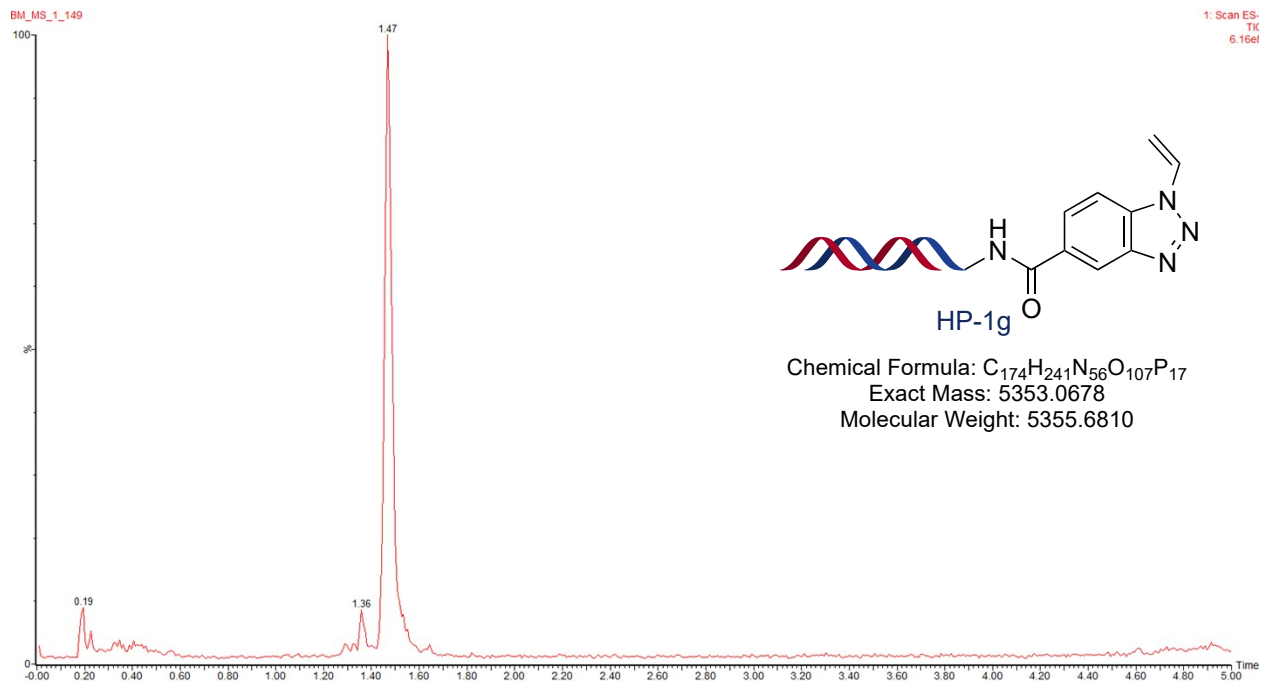

TIC of HP-1g.

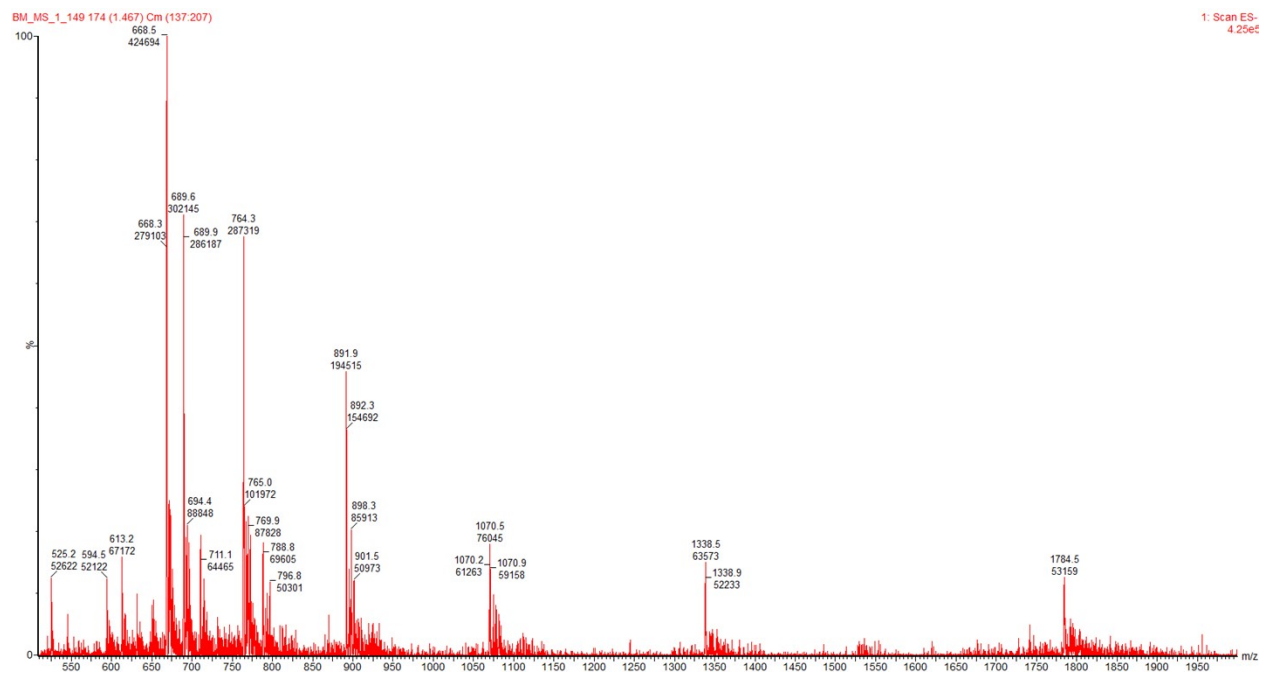

Raw MS of HP-1g.

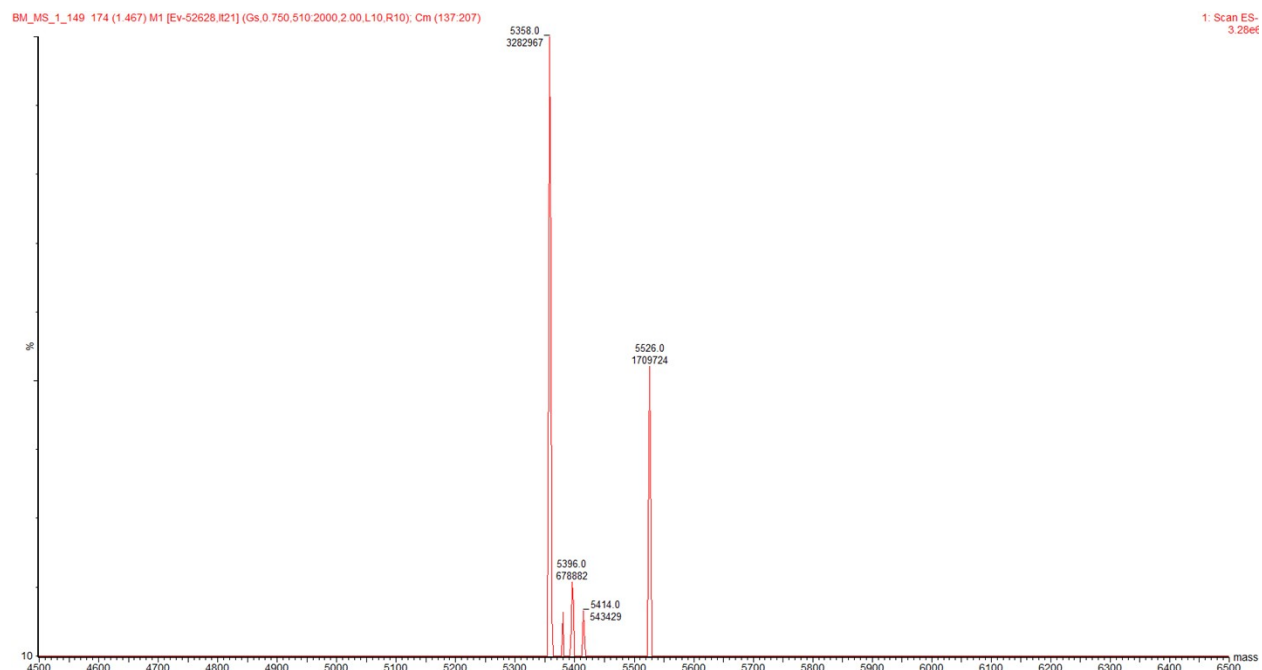

Deconvoluted MS of **HP-1g**. (mass signals >10% of peak height).

## 7.2 Hydroalkylated Compounds on-DNA

For most of the examples in the scope, the alkene-headpiece starting materials were recovered along with the major formation of the desired alkylated compound on-DNA. The recovered starting materials percentages (rsm) are also included in parenthesis for each of the examples.

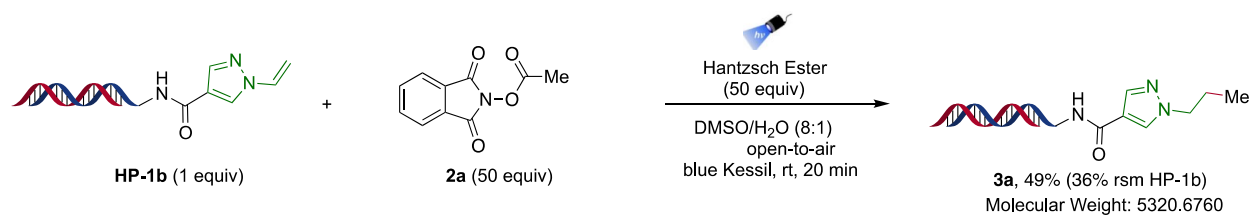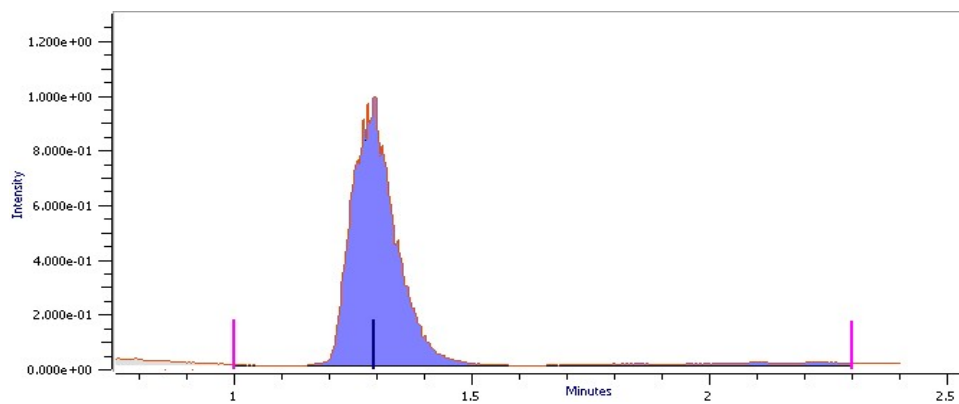

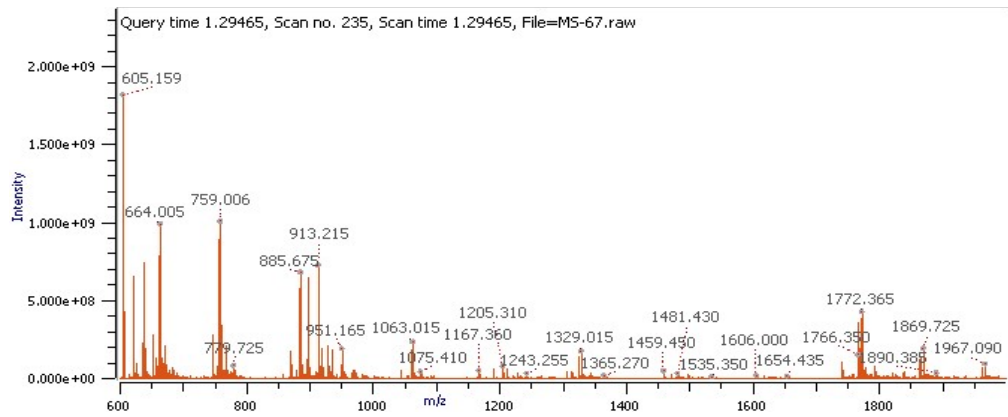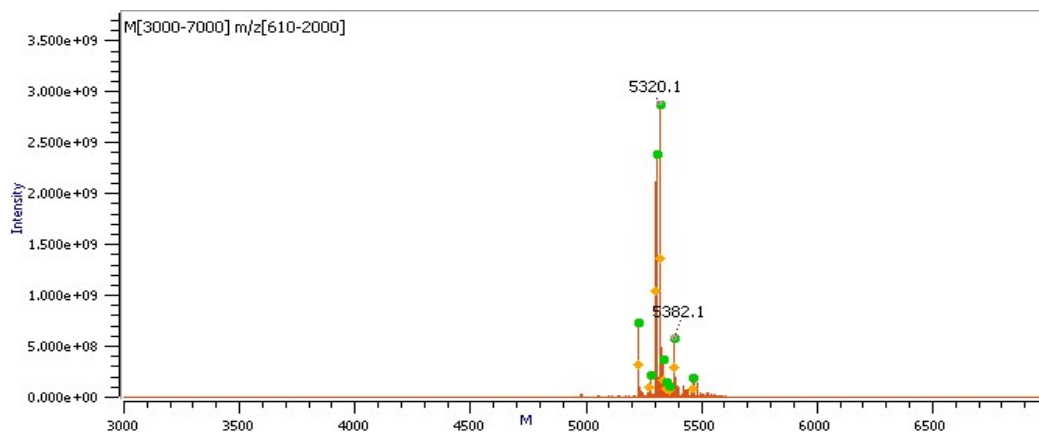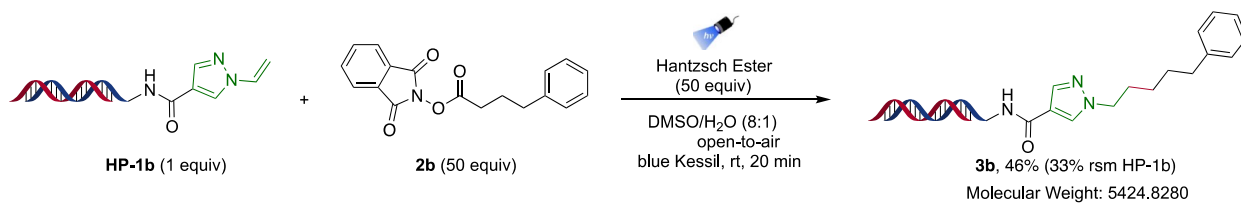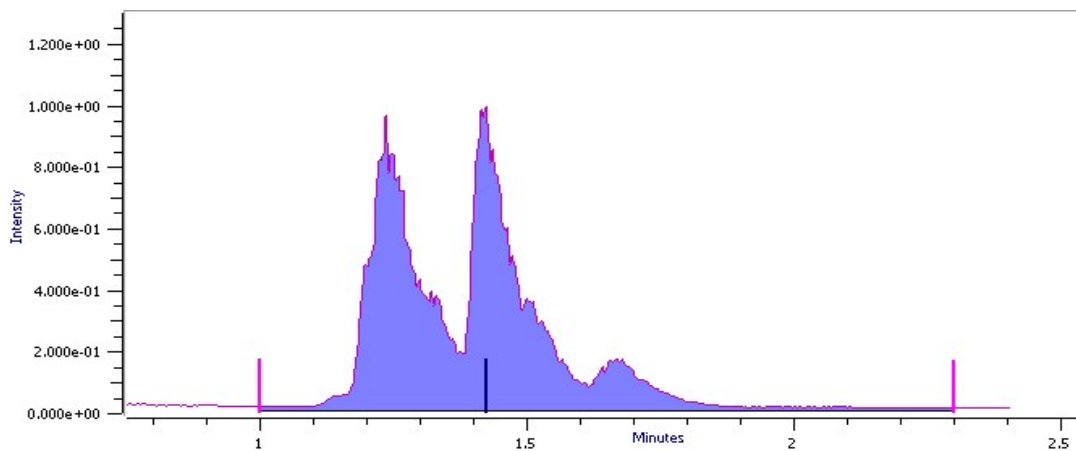

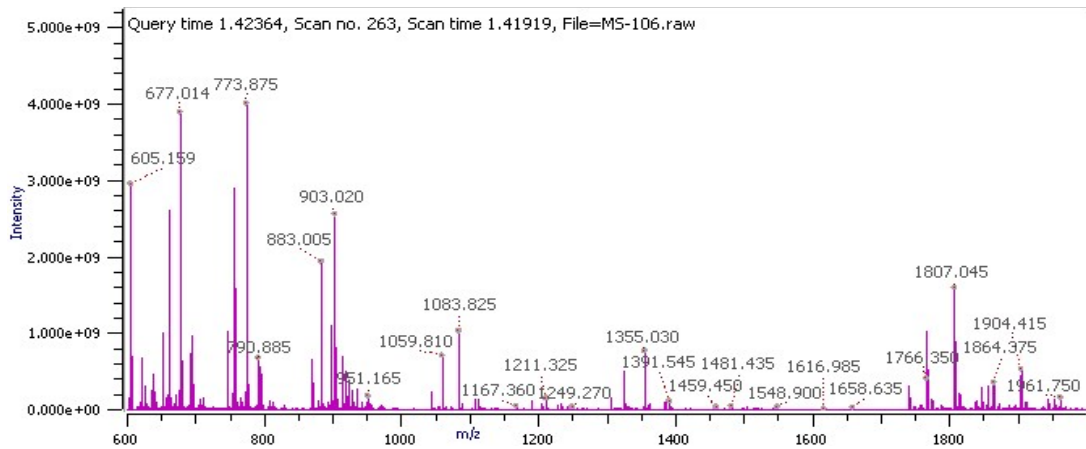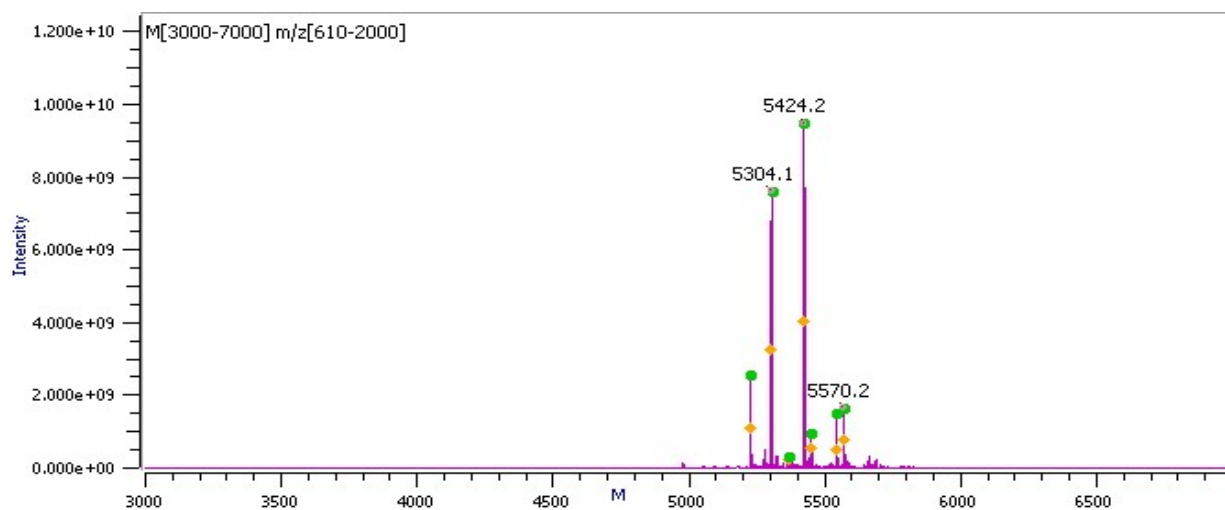

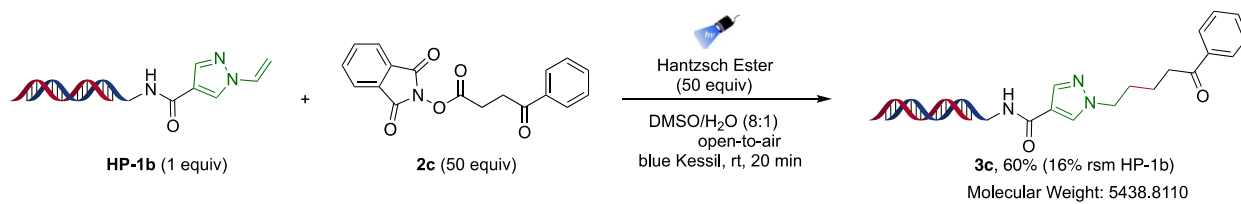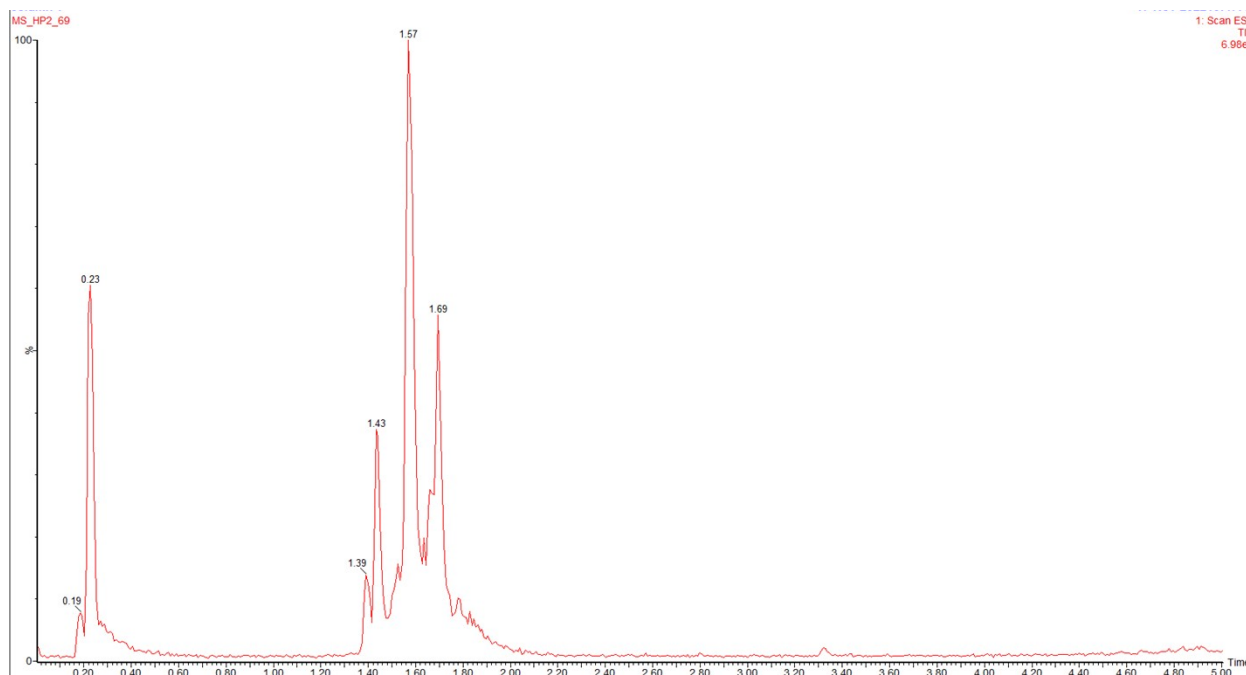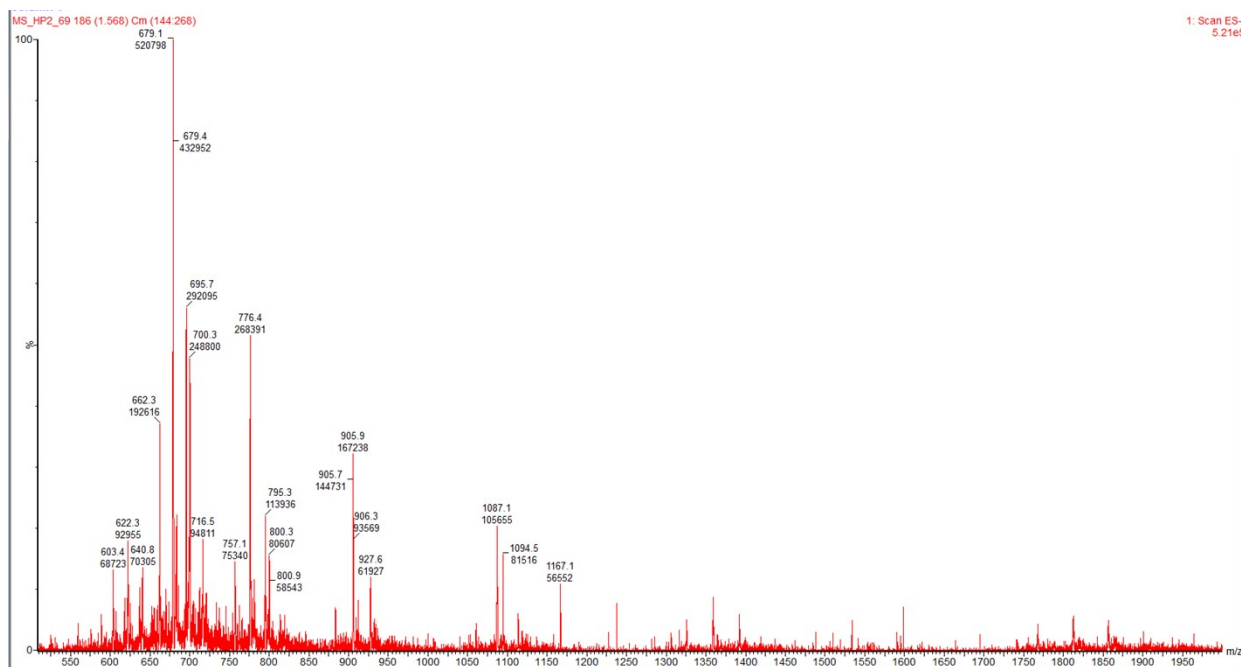



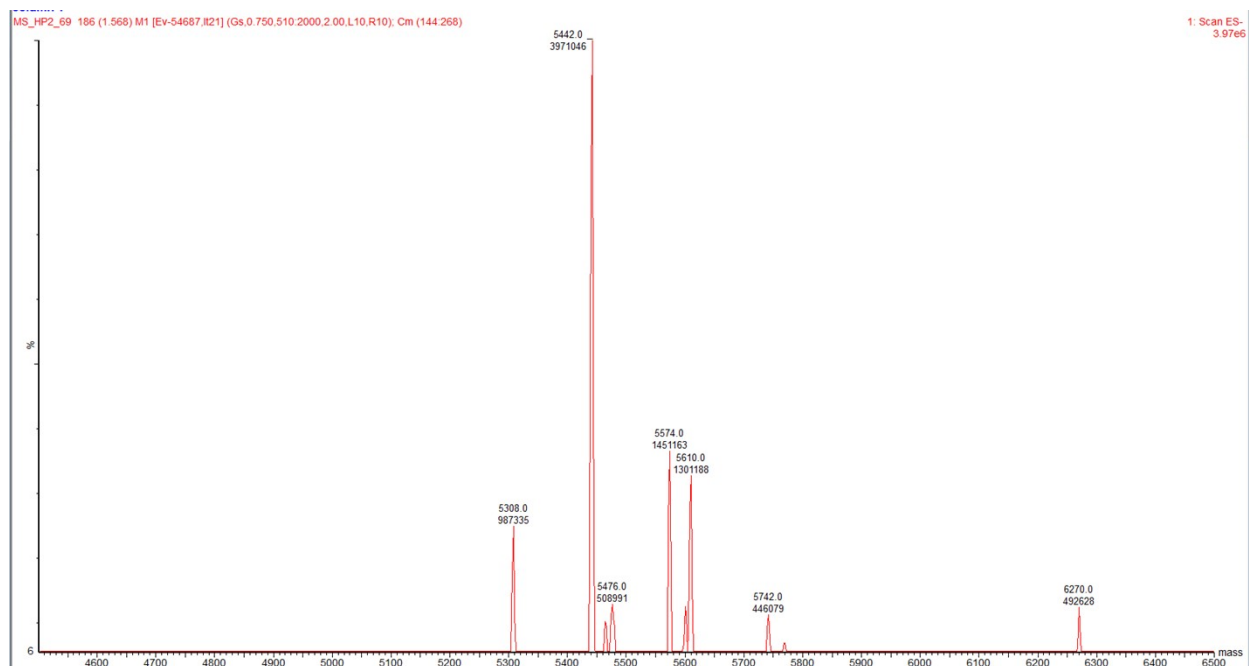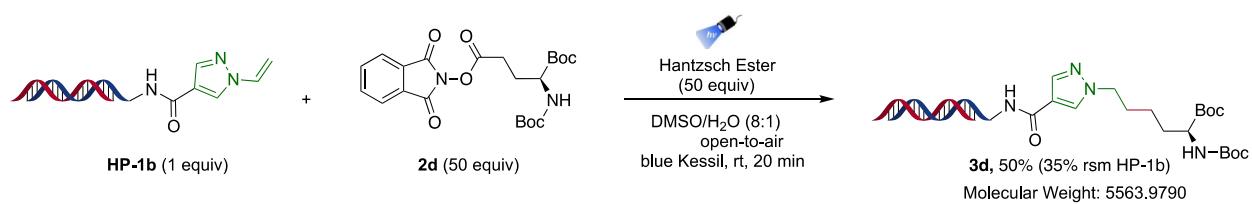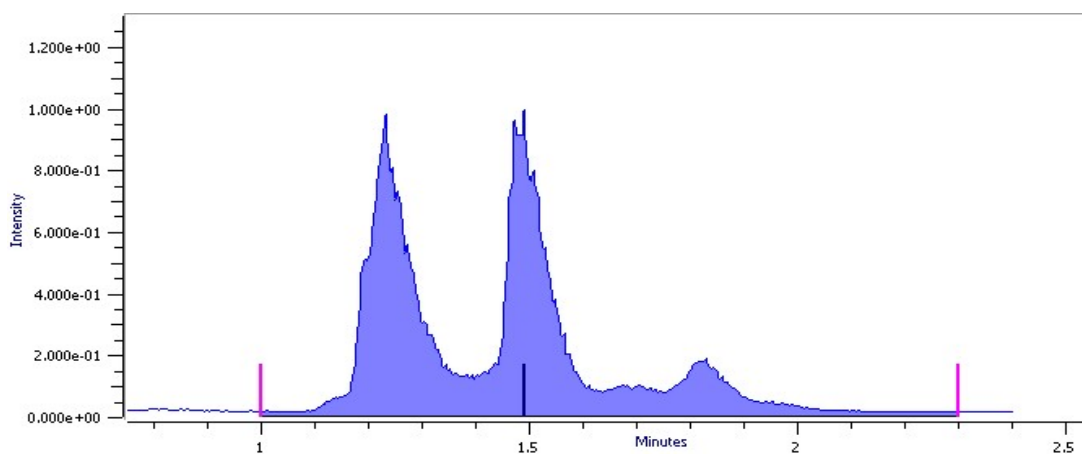

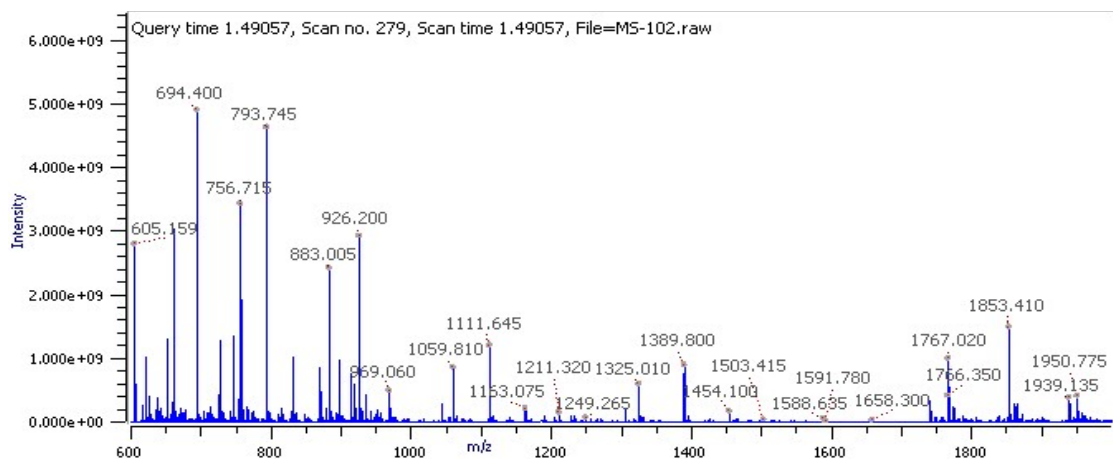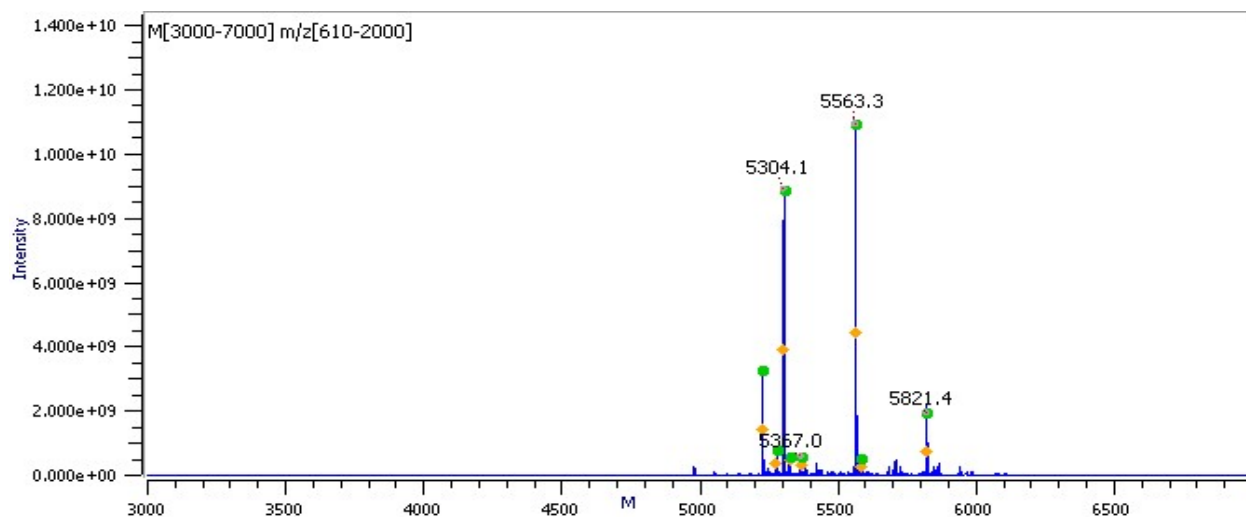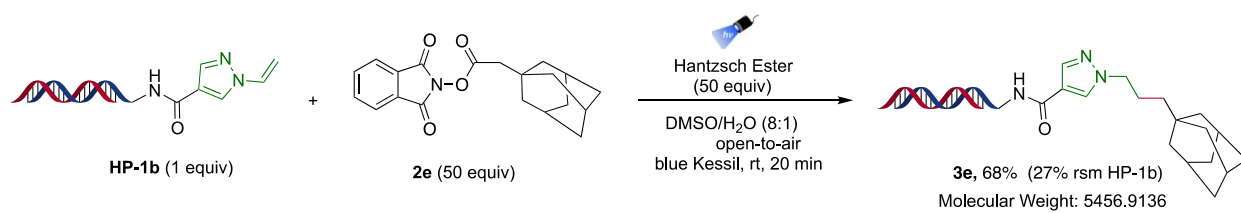

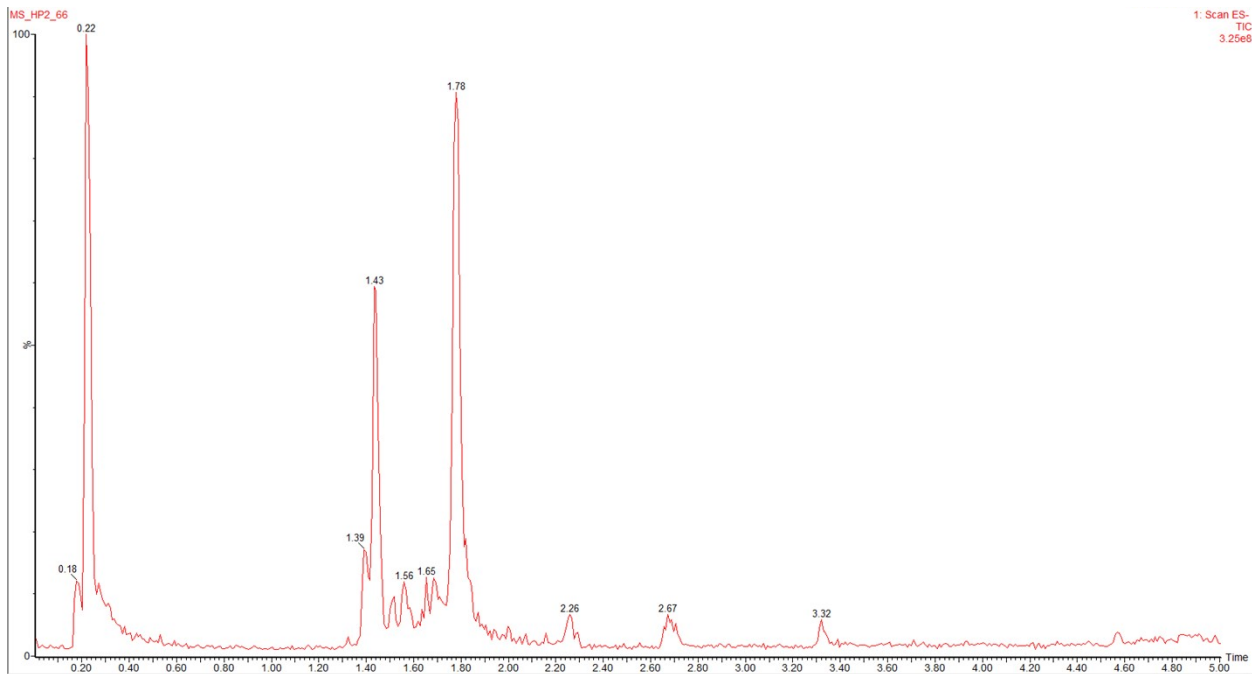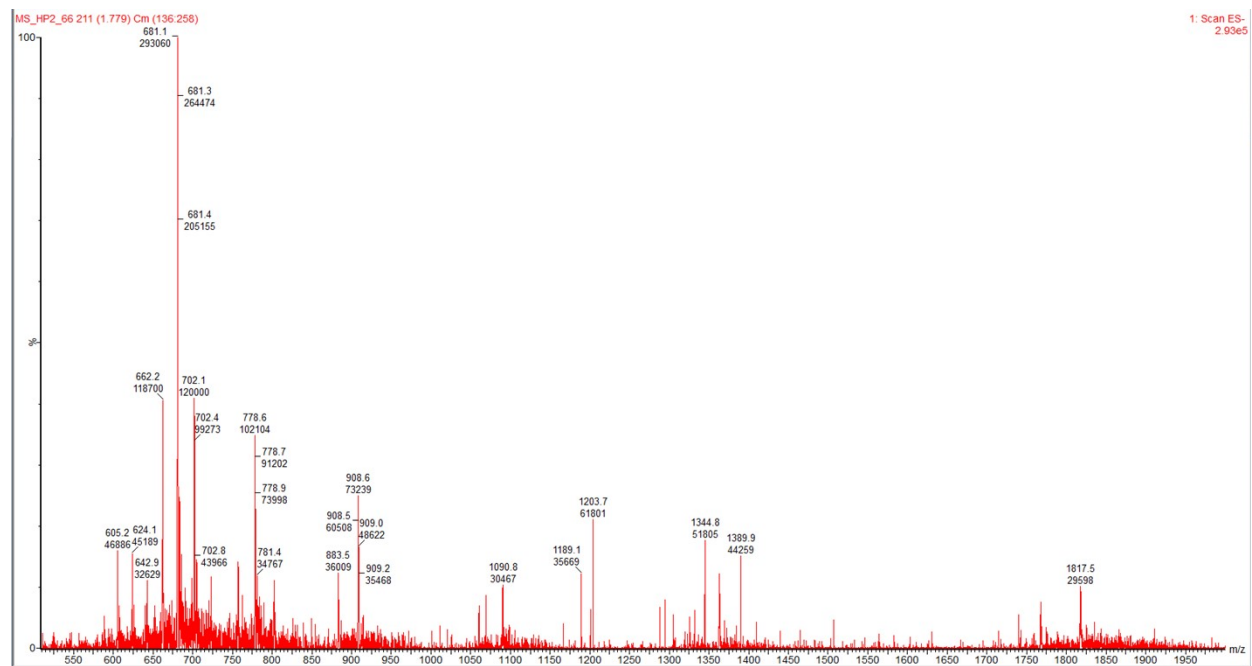

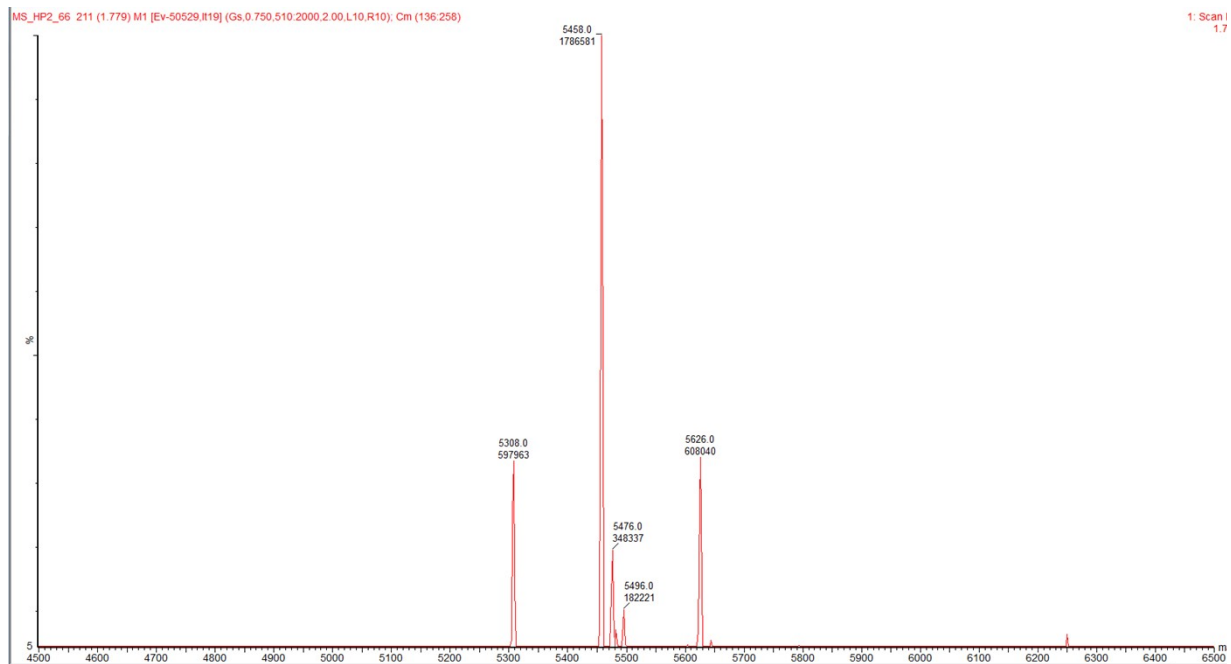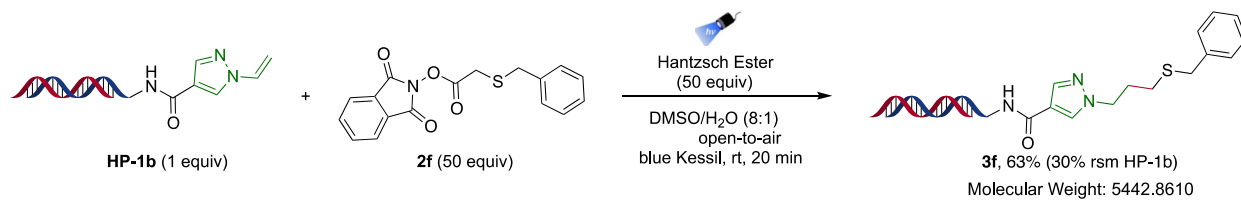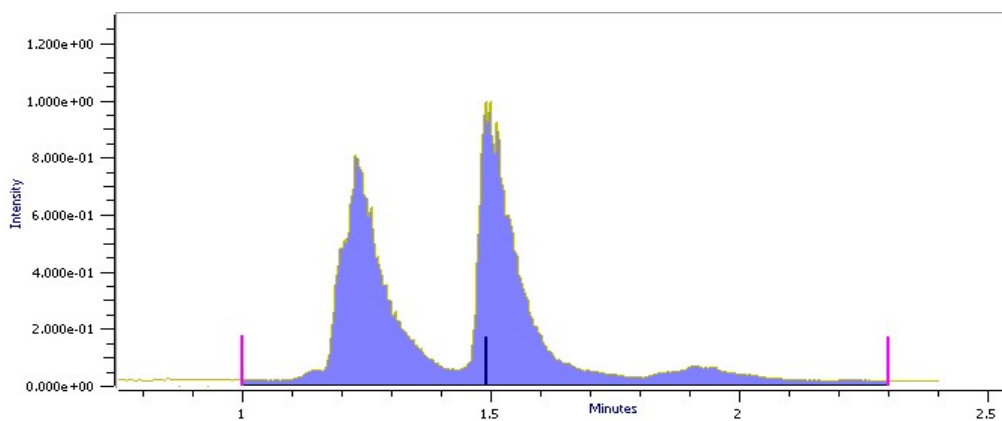

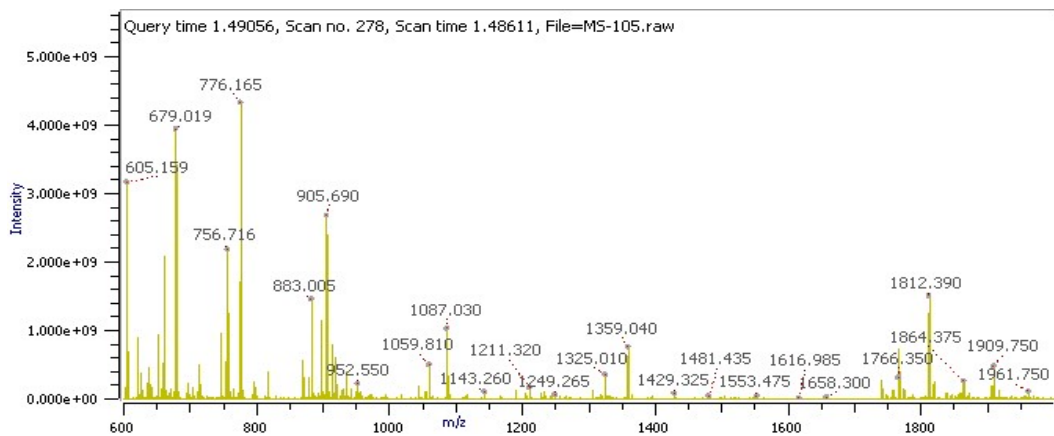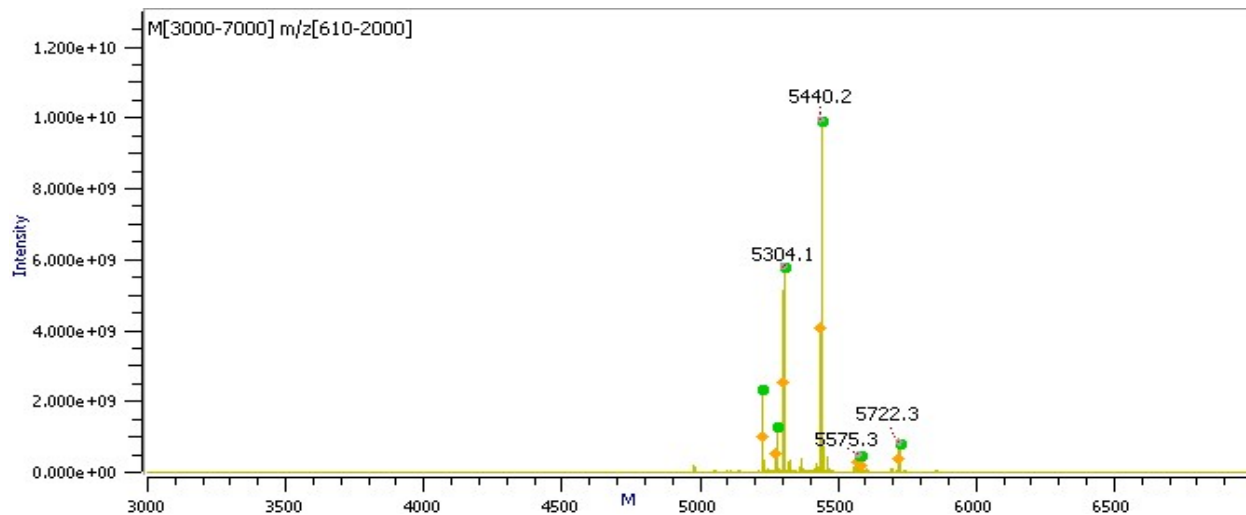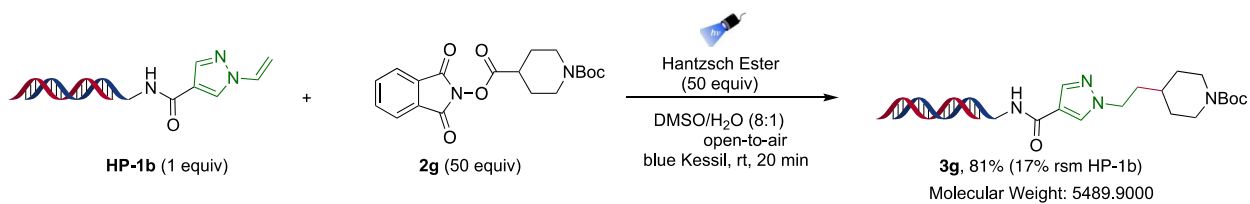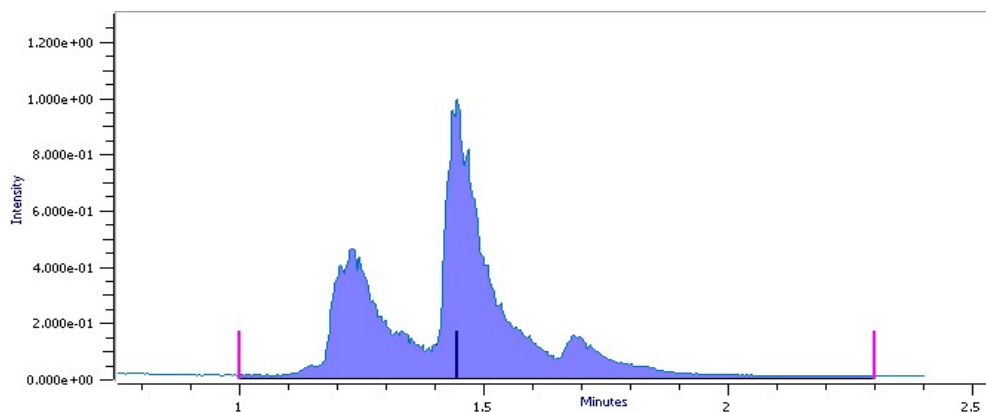

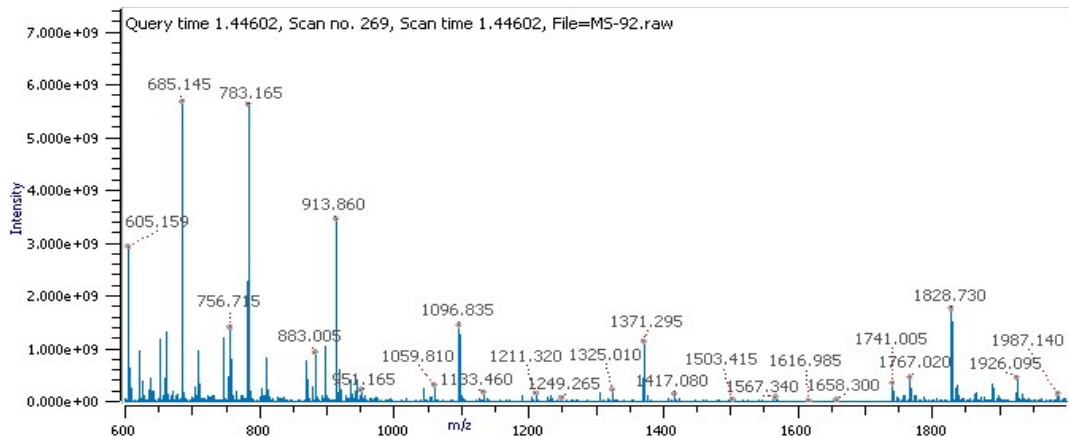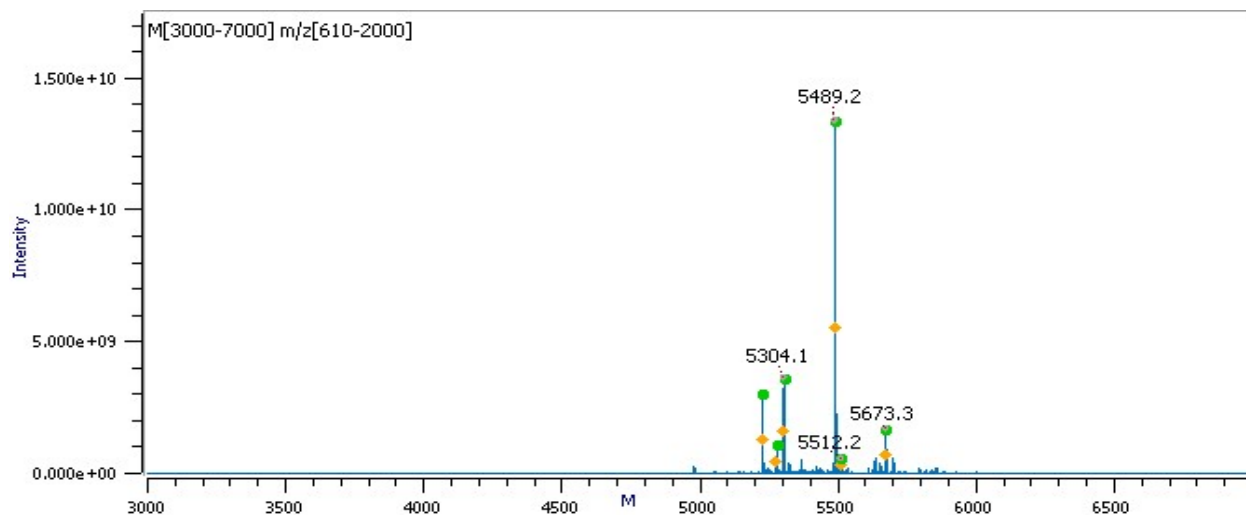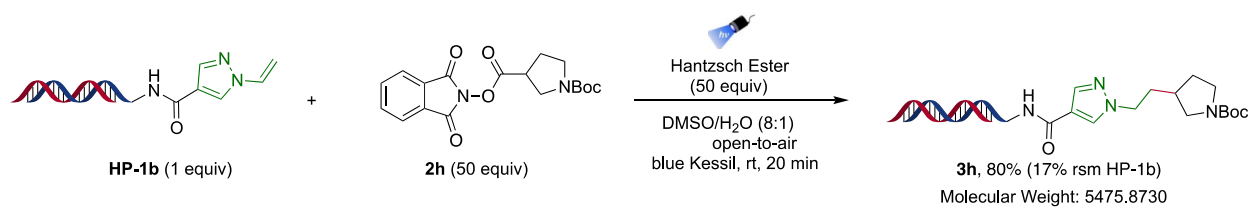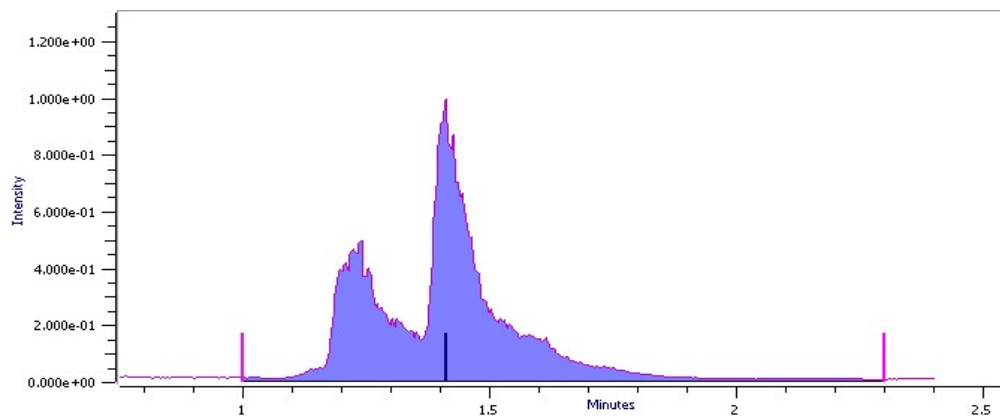

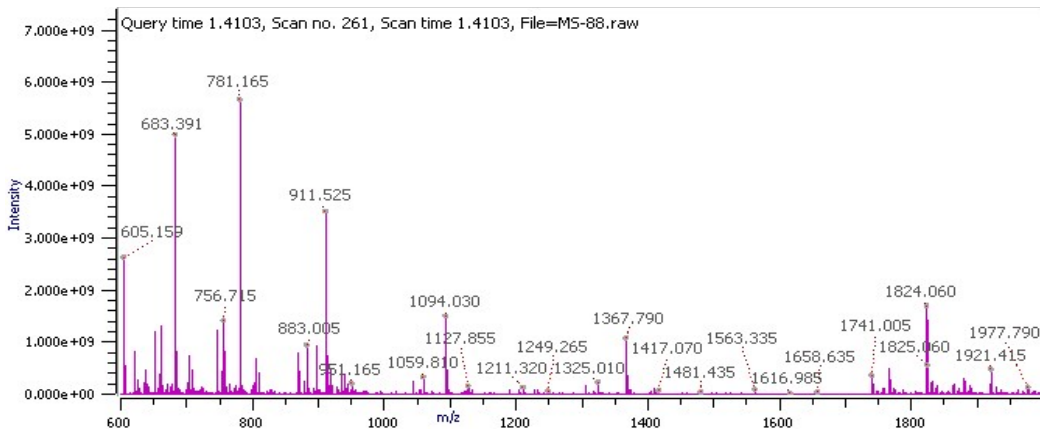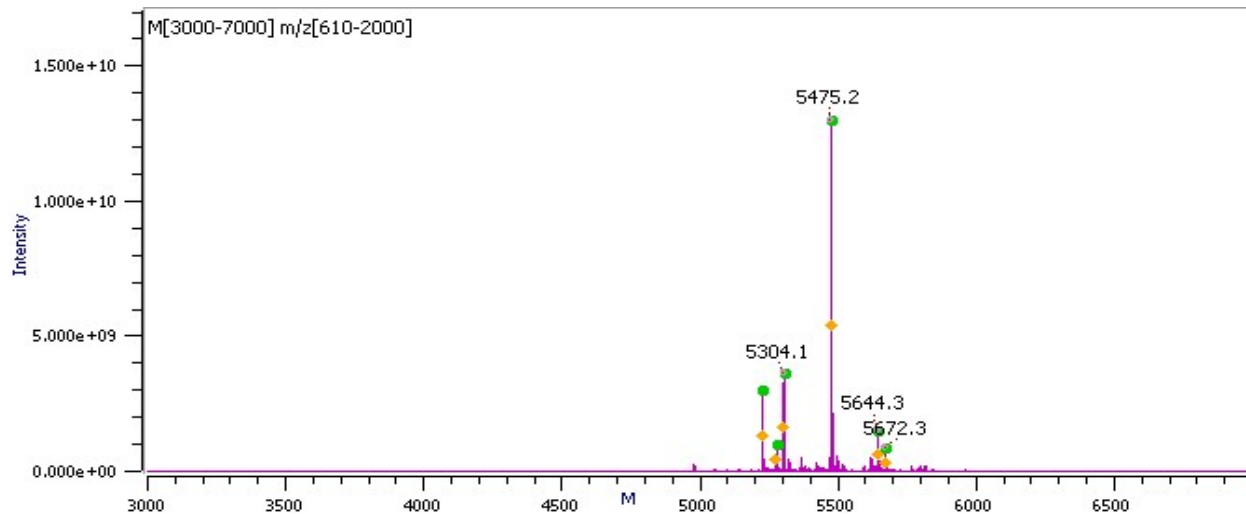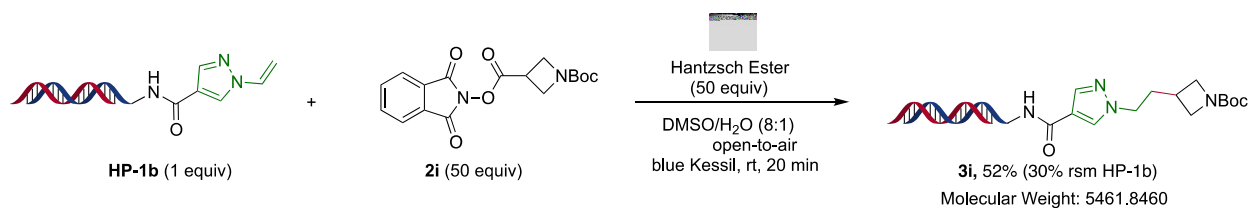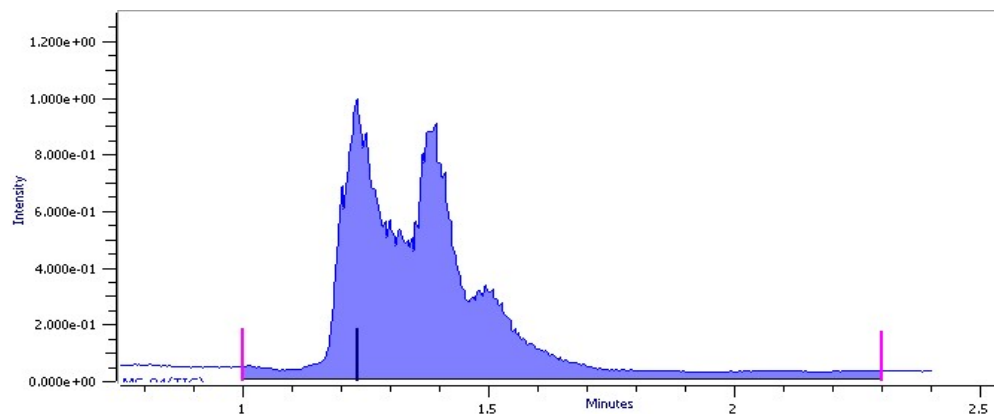

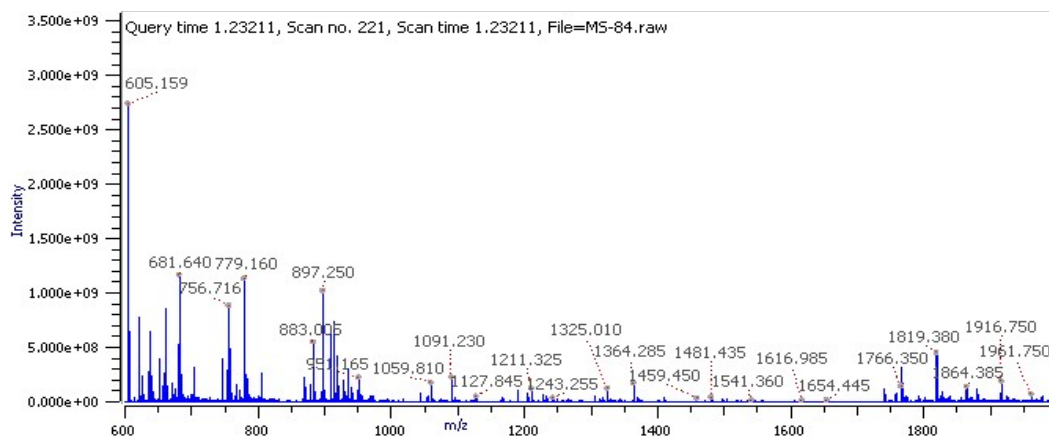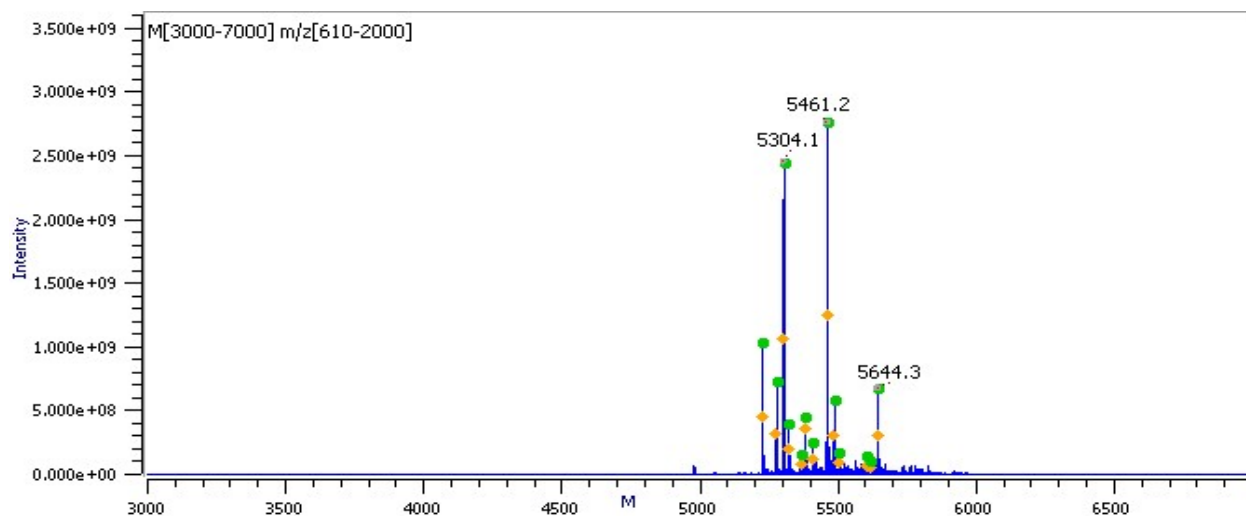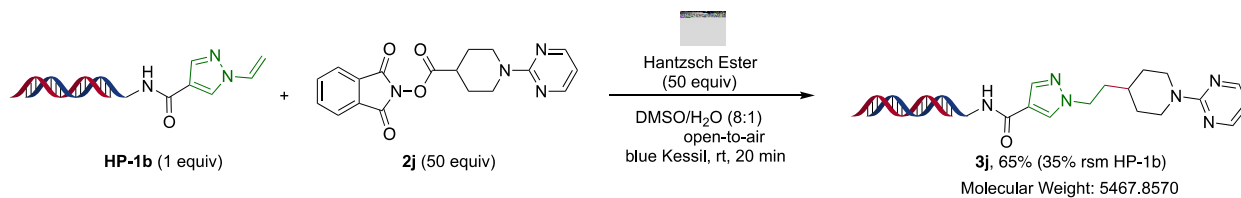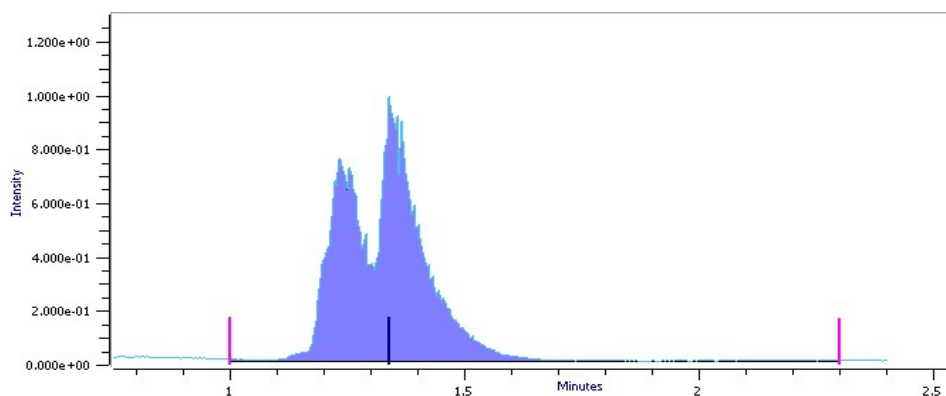



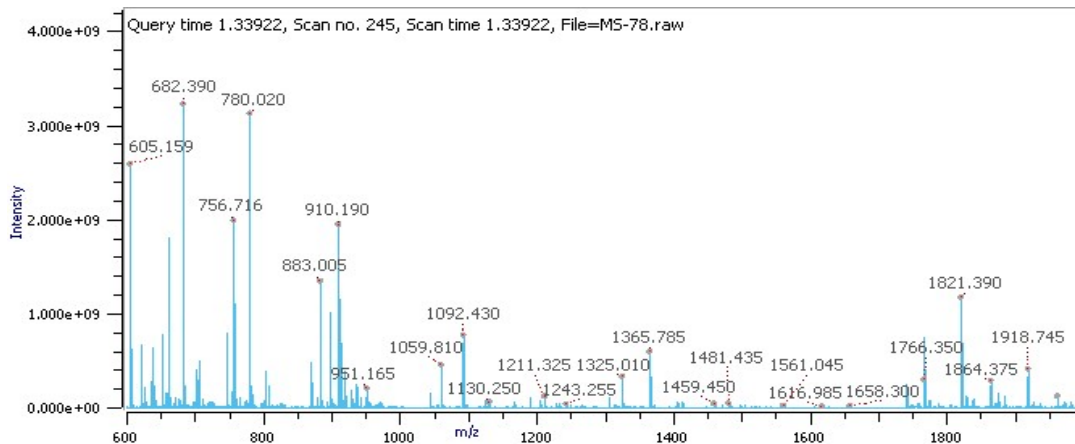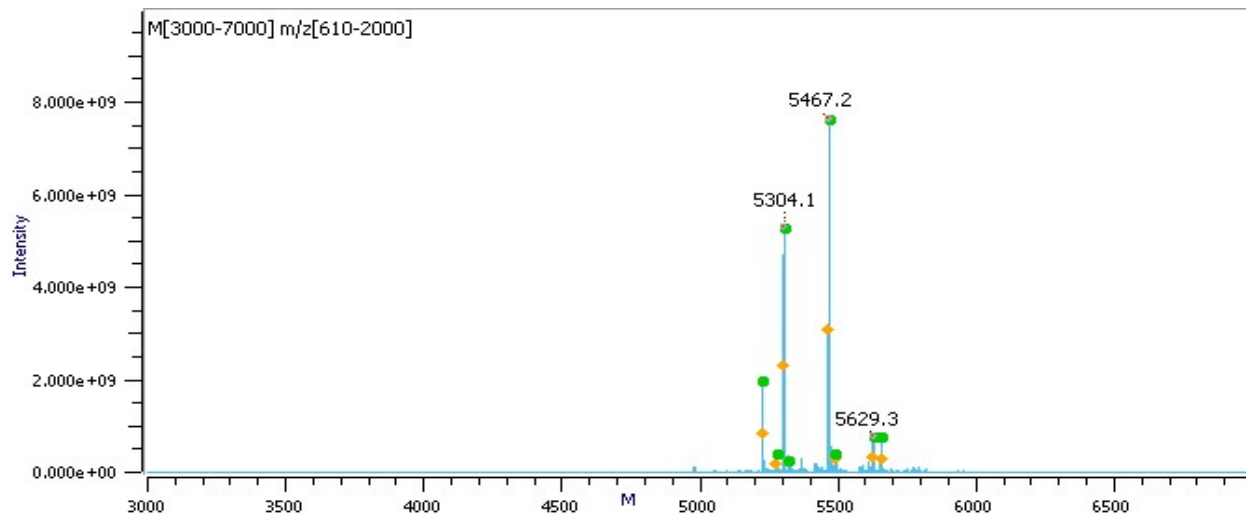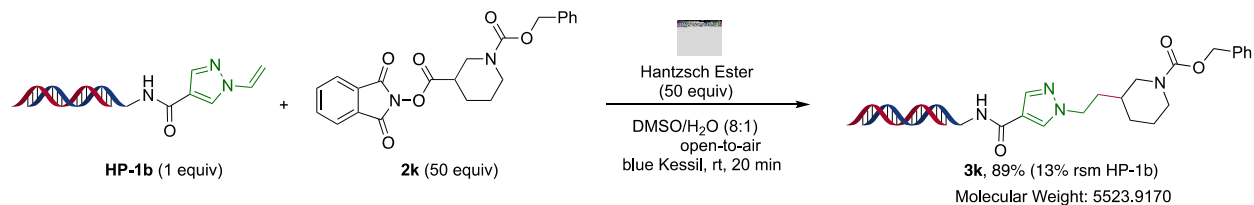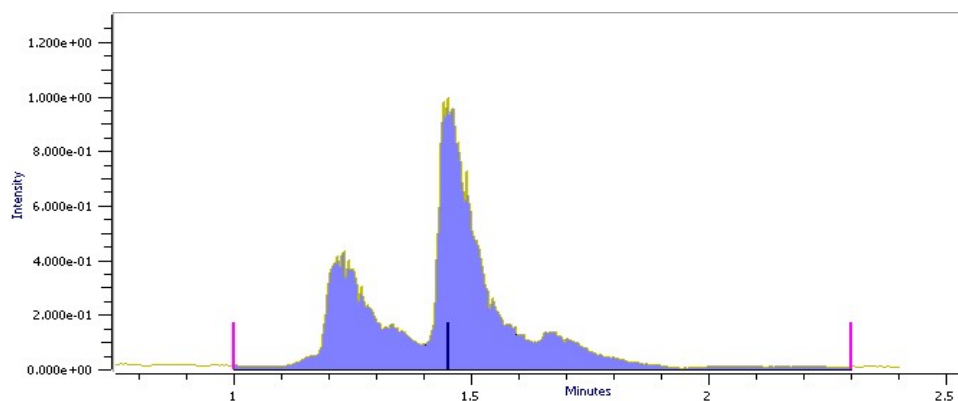

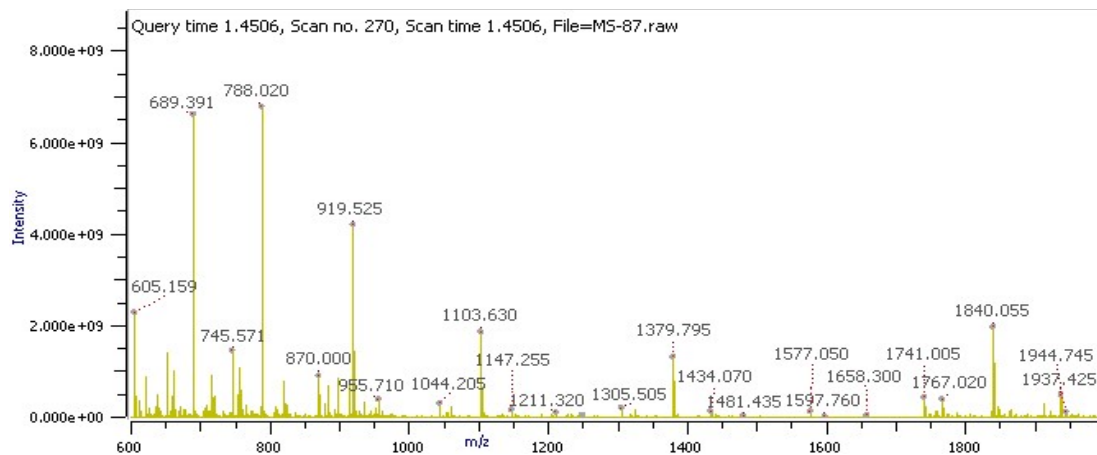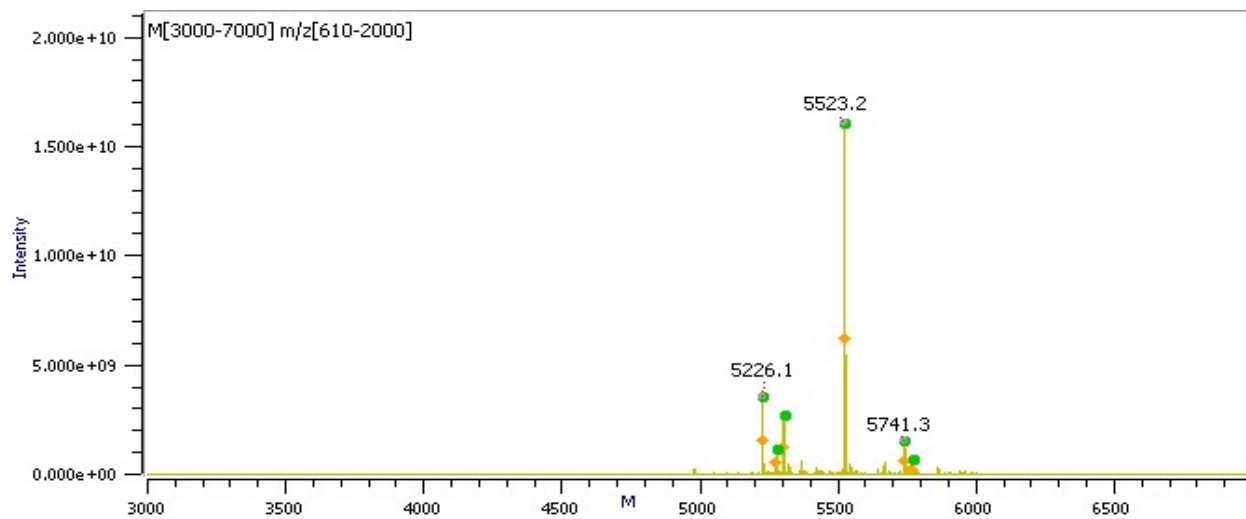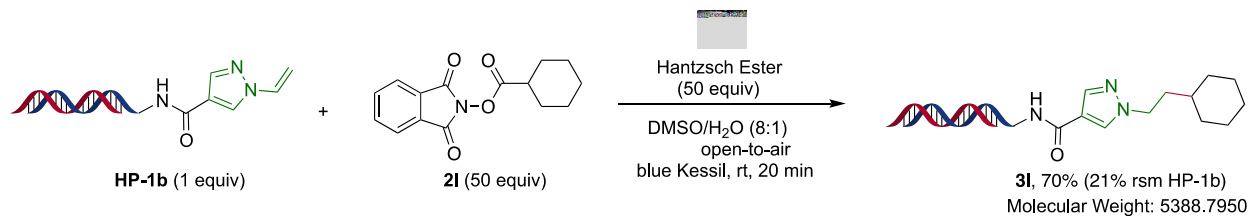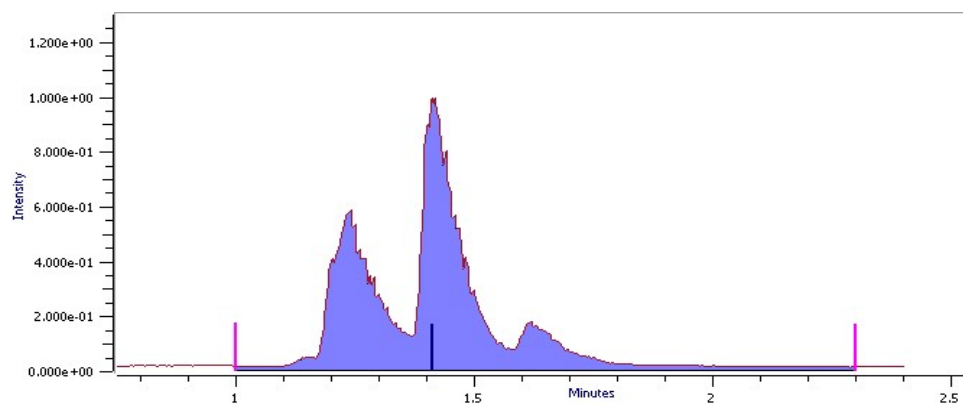

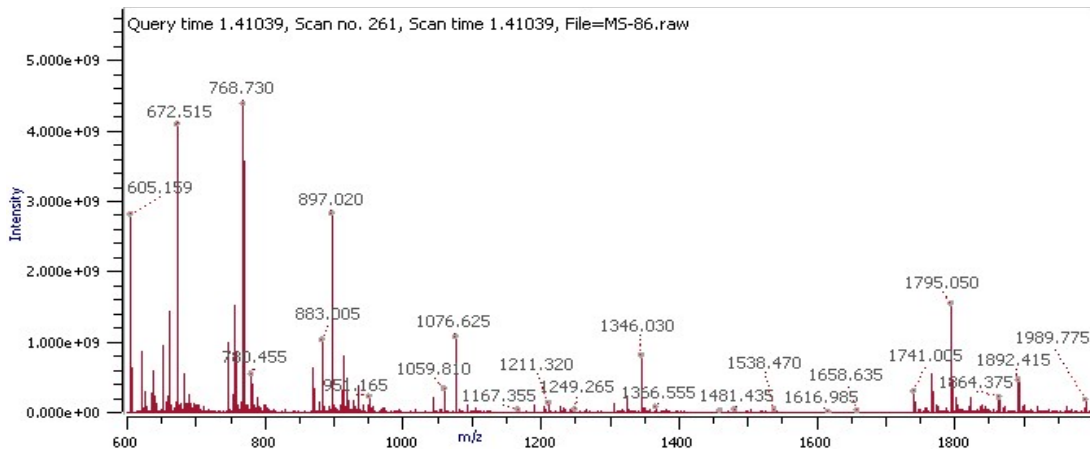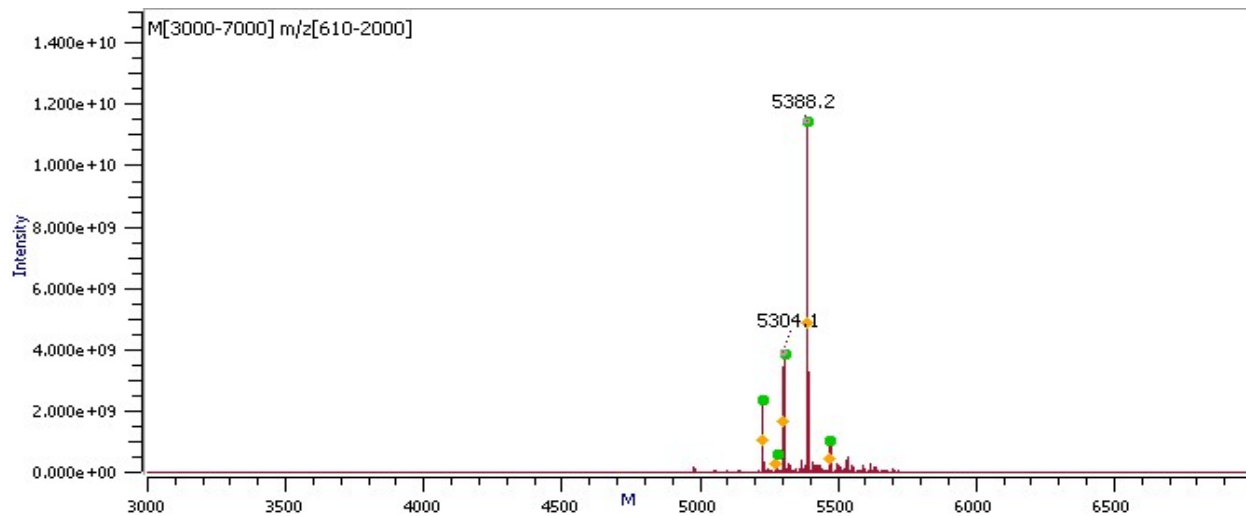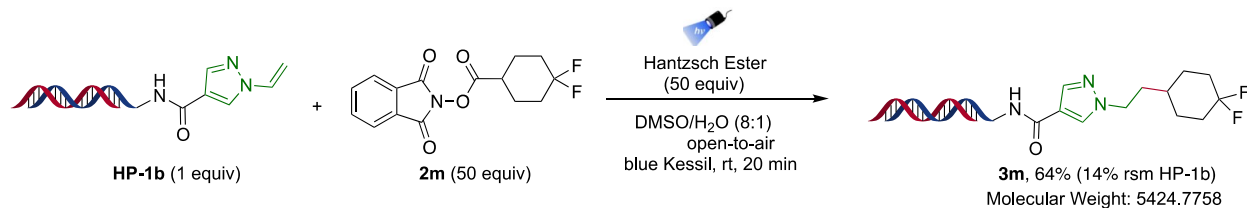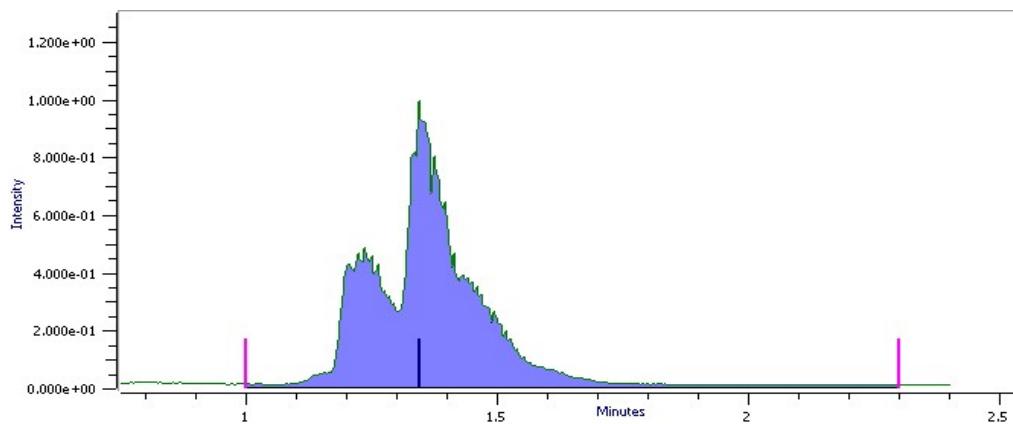

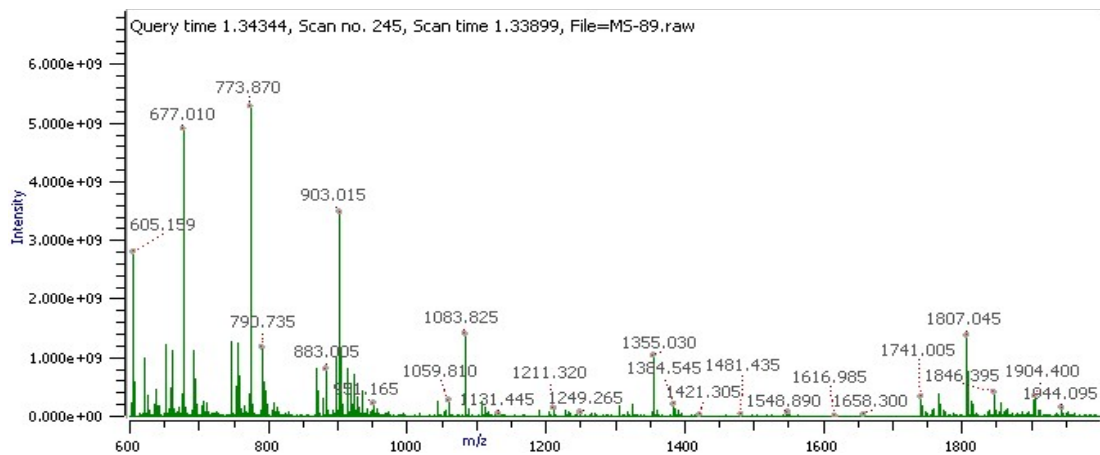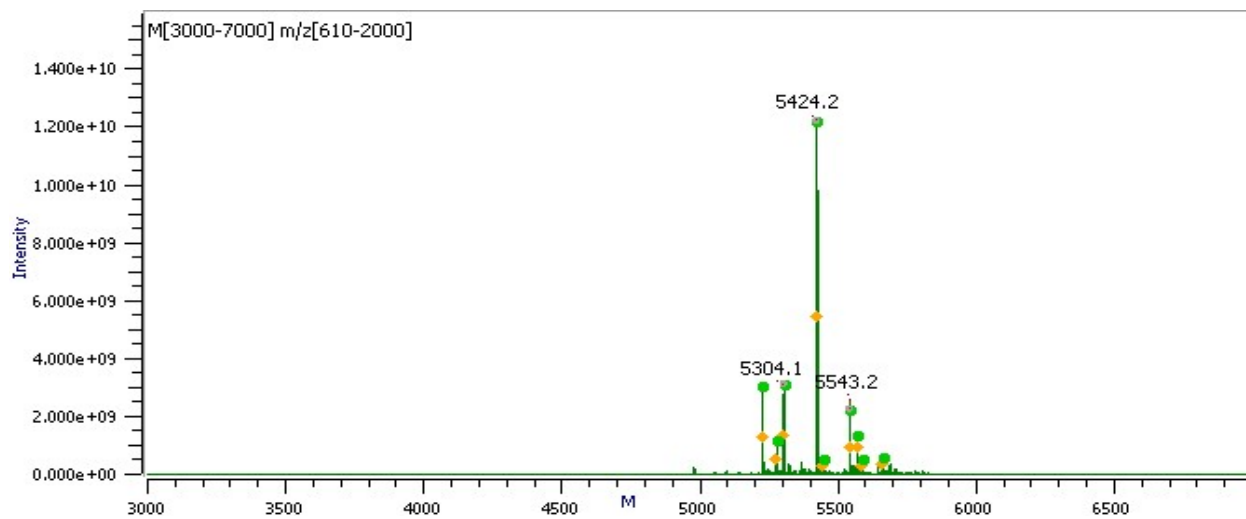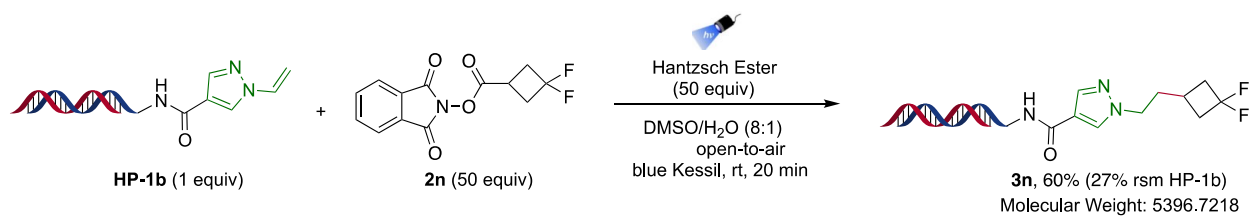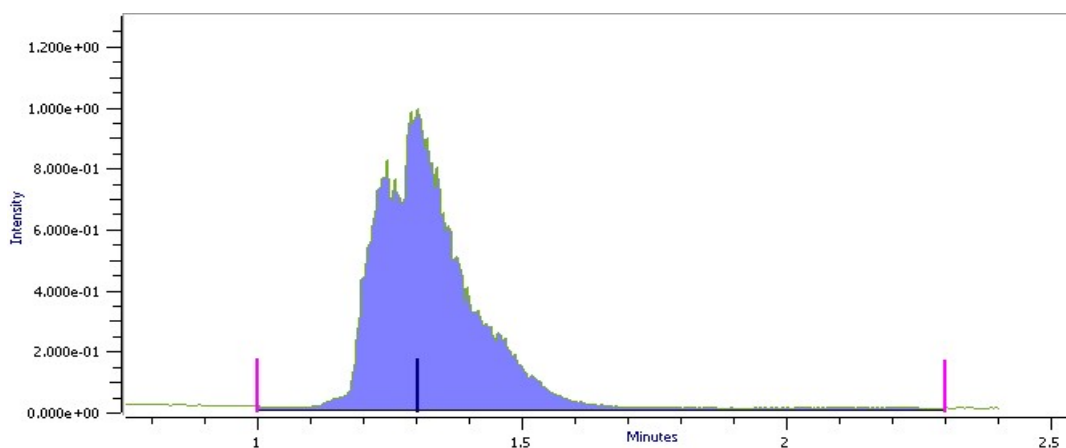

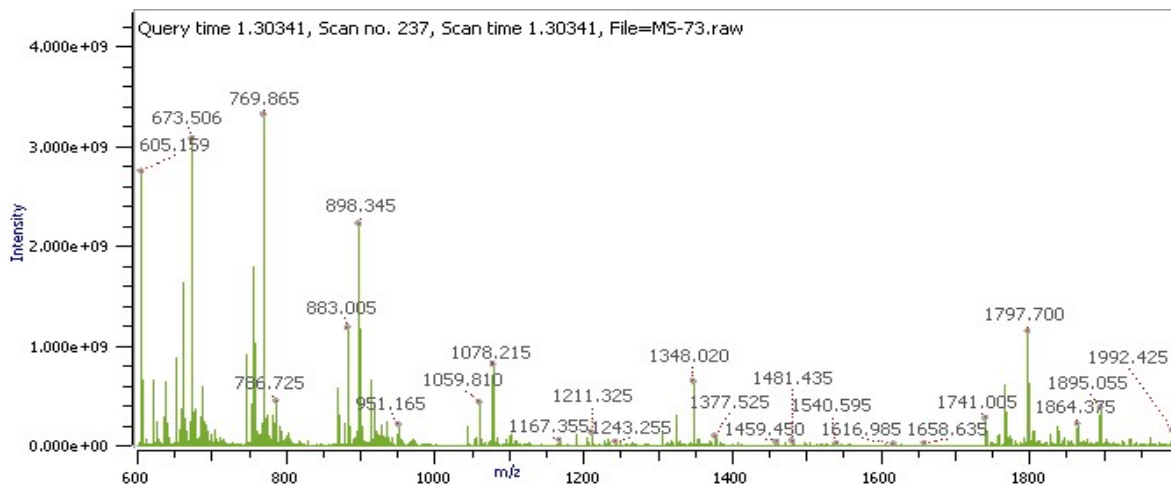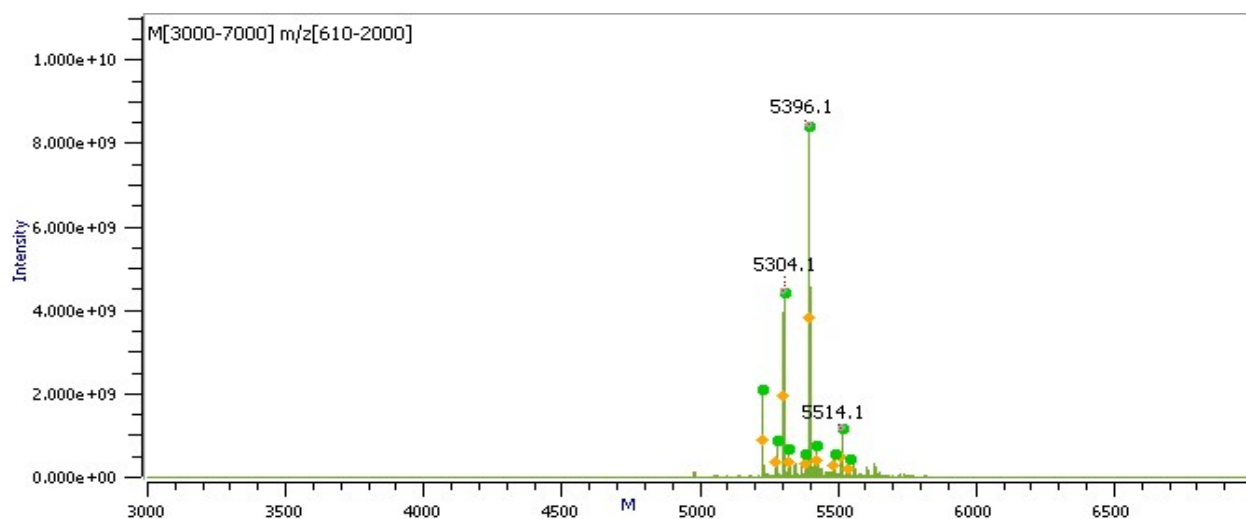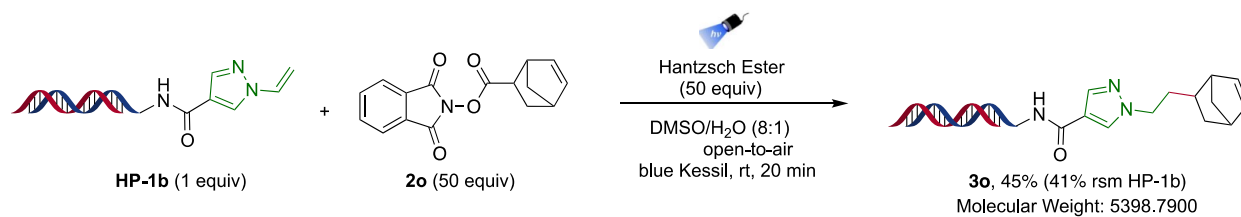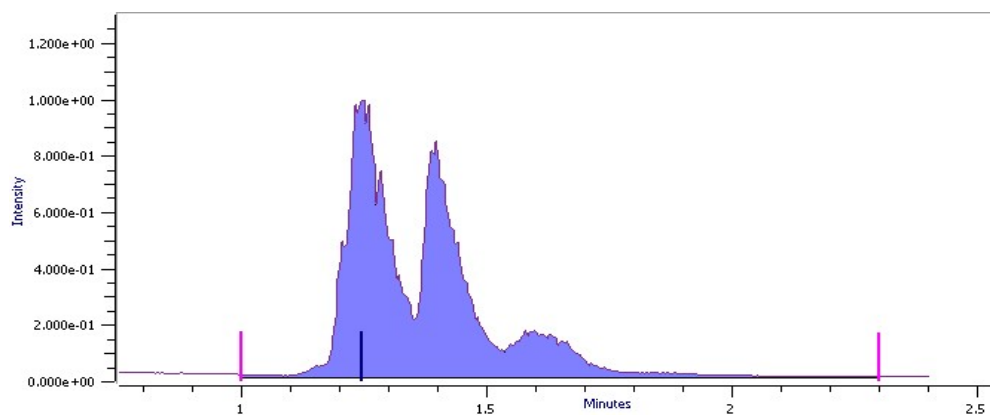

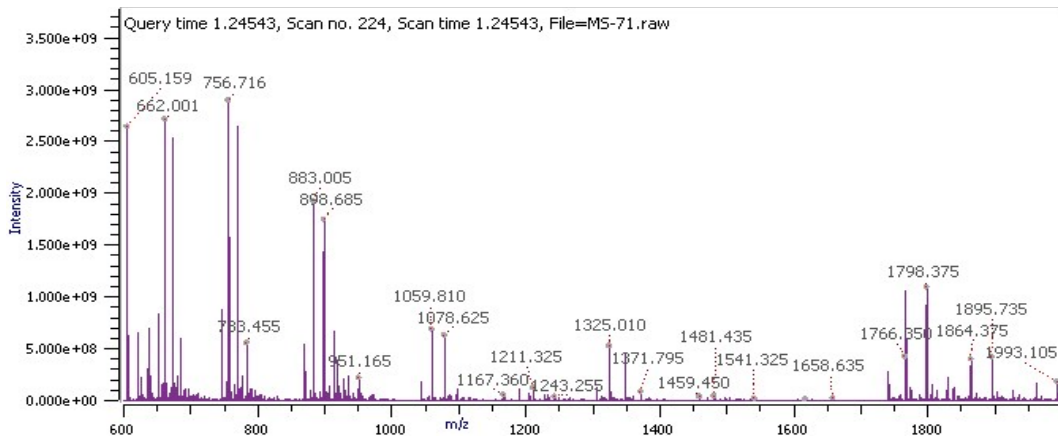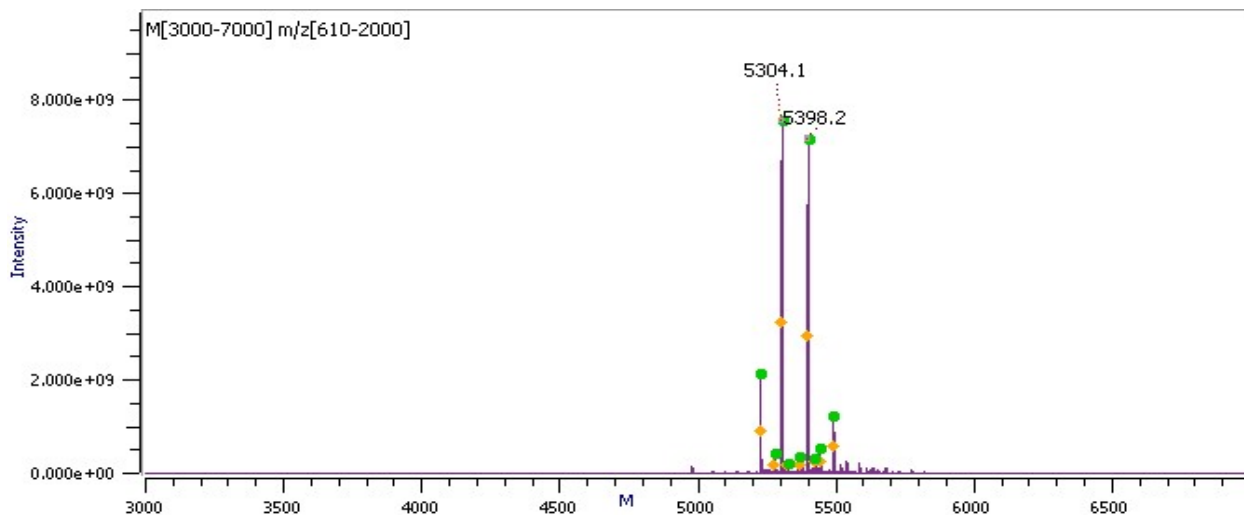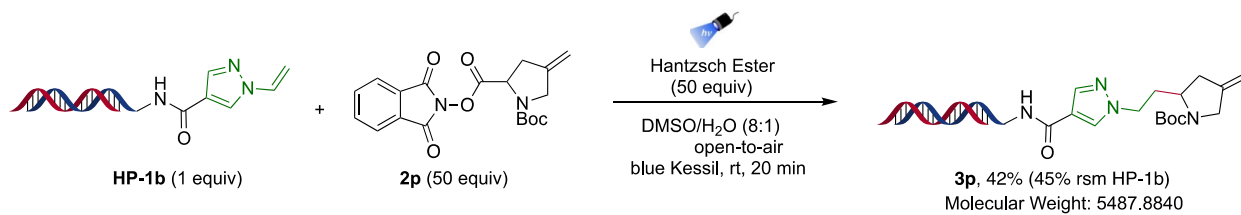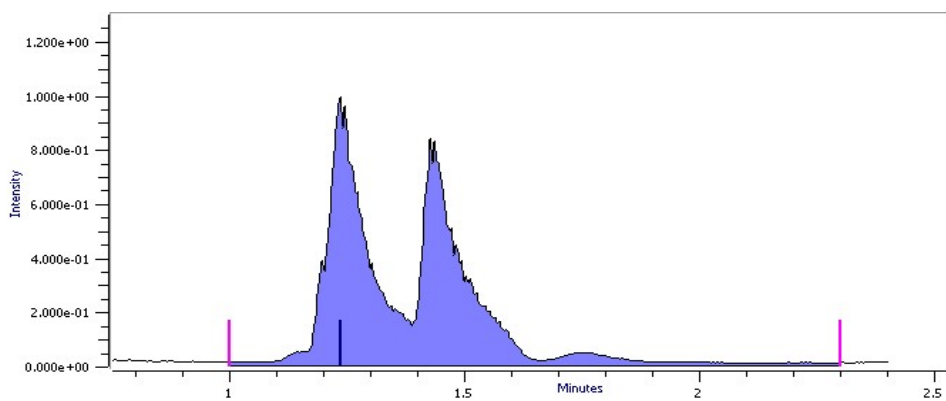

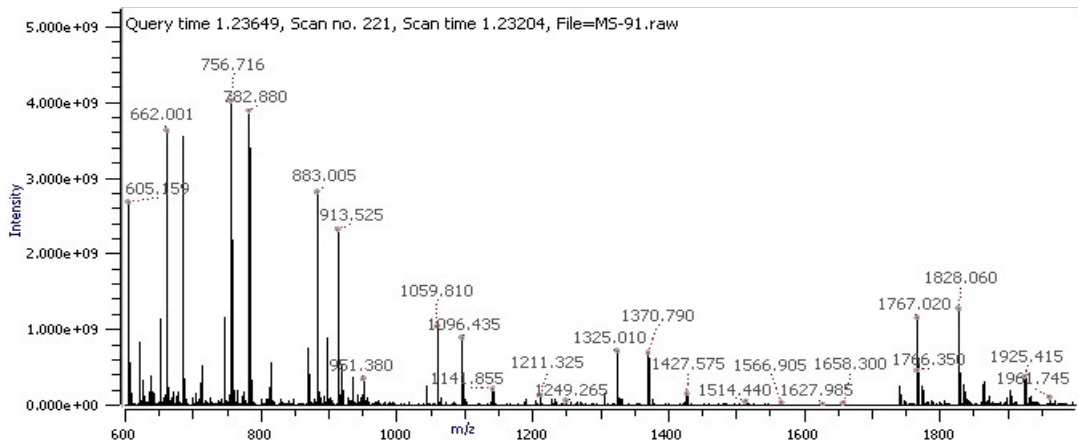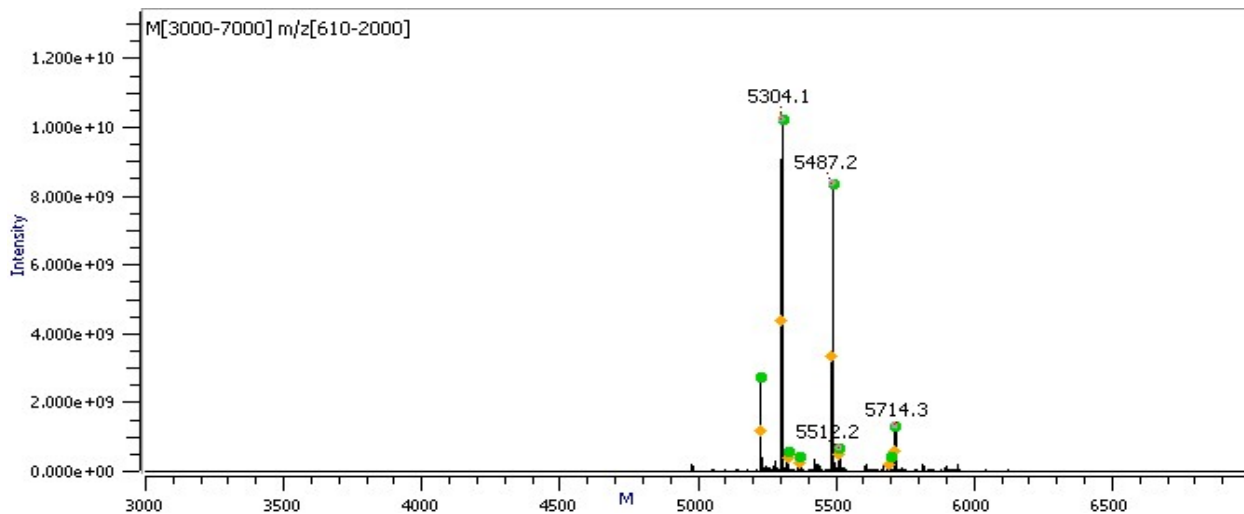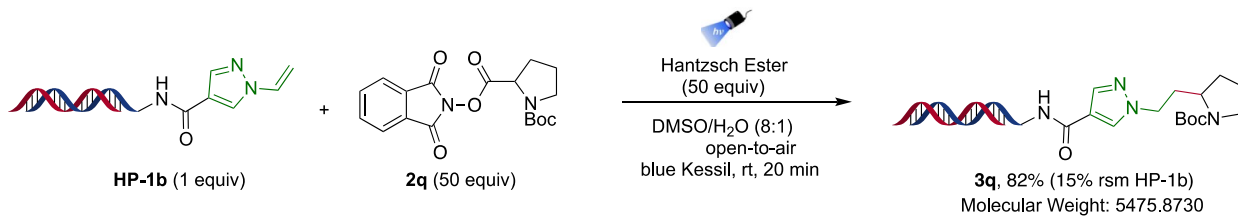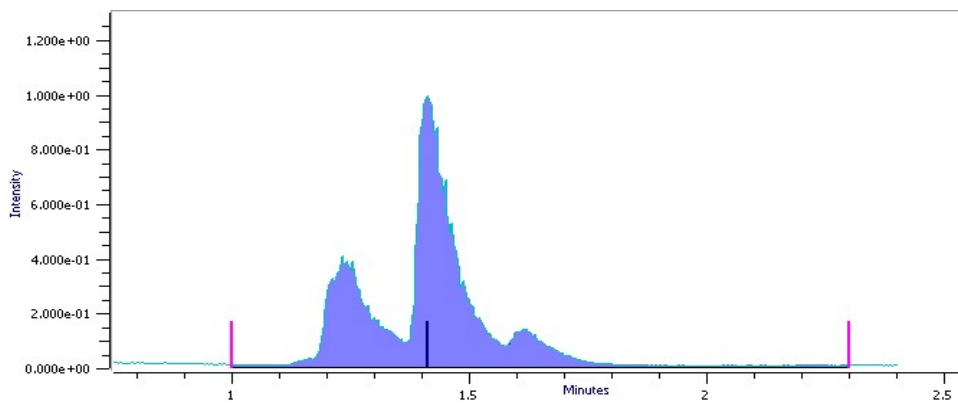

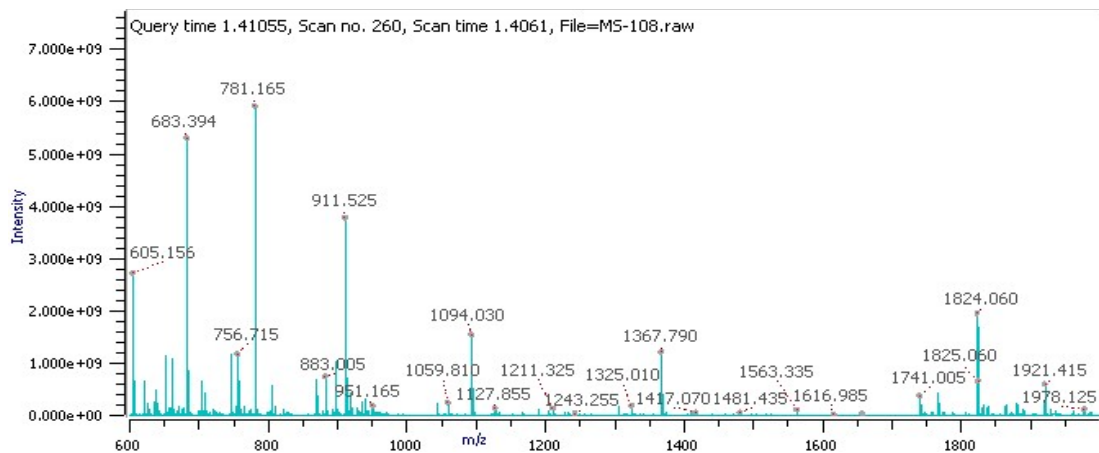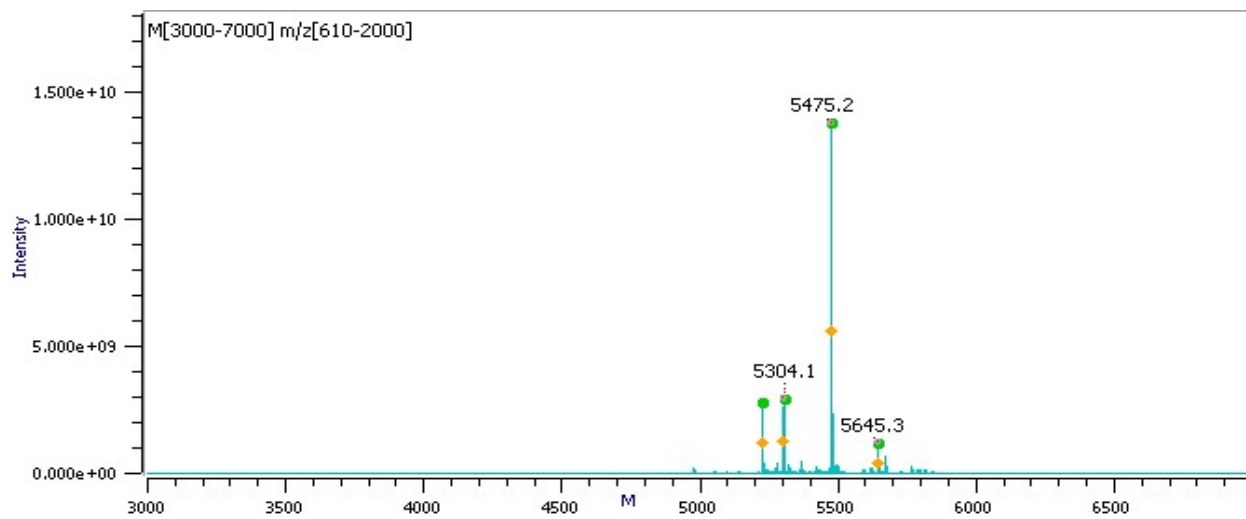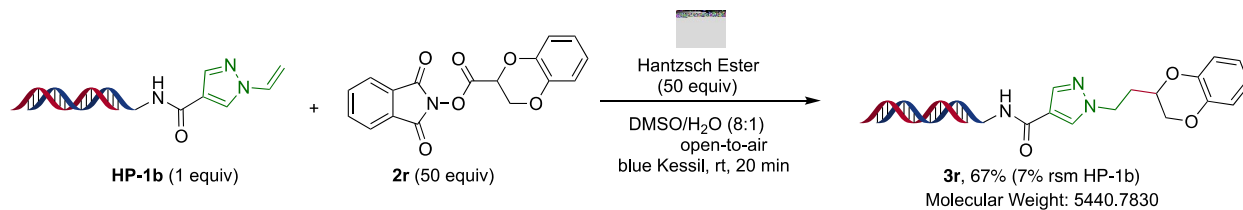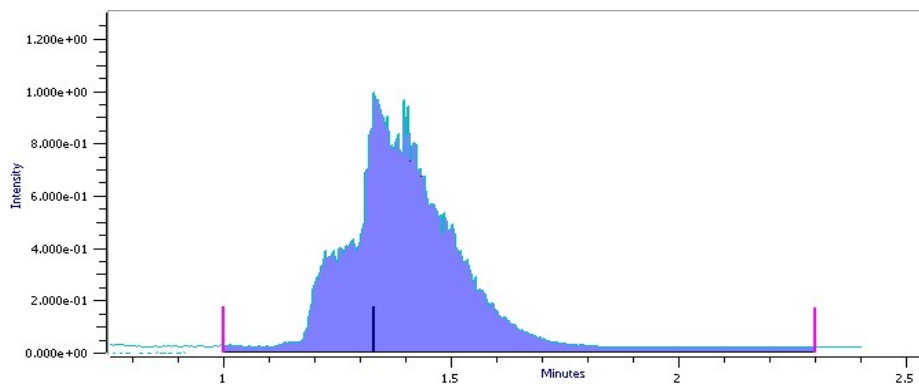



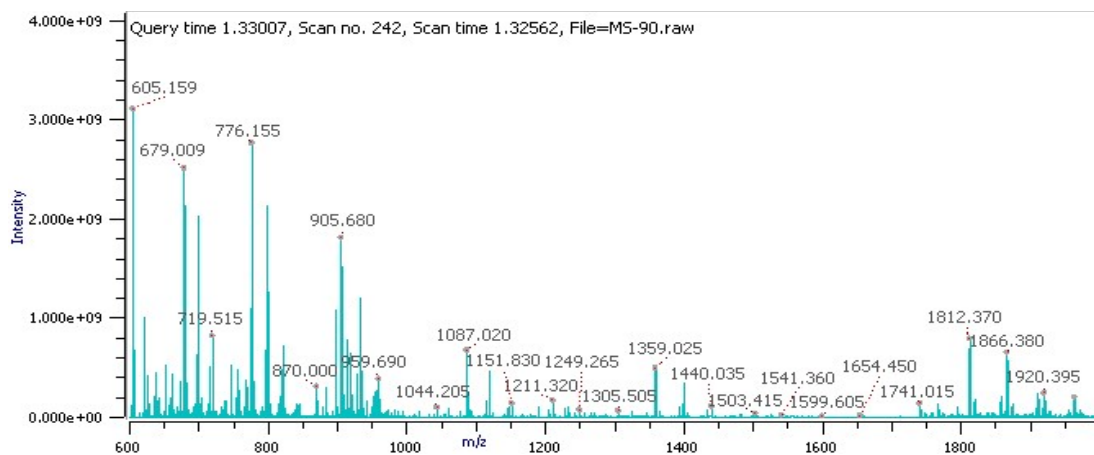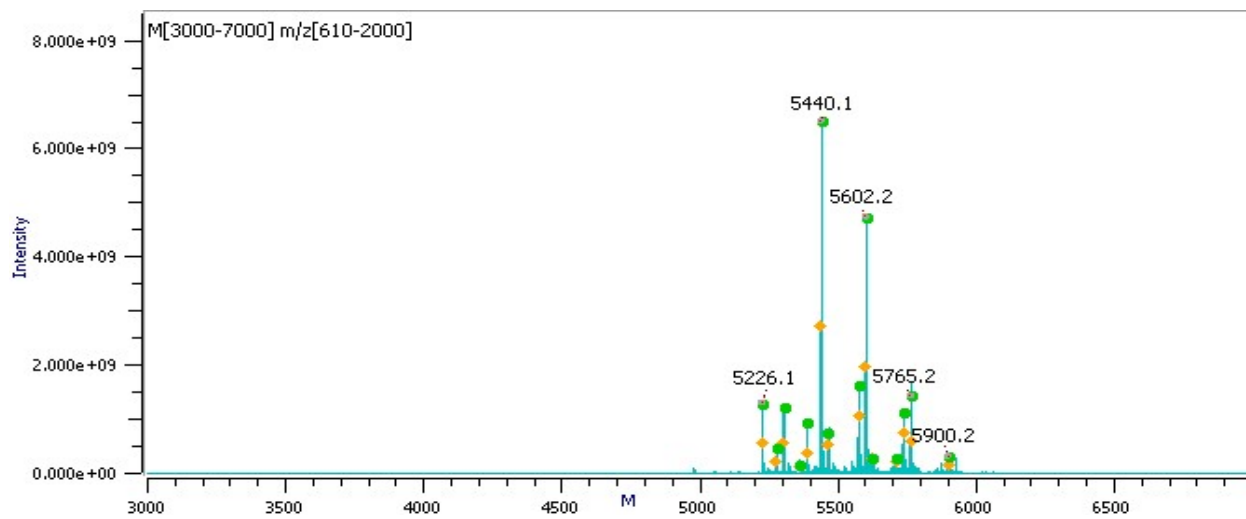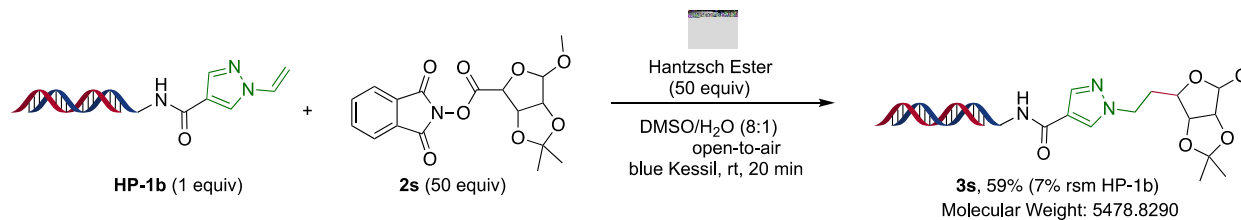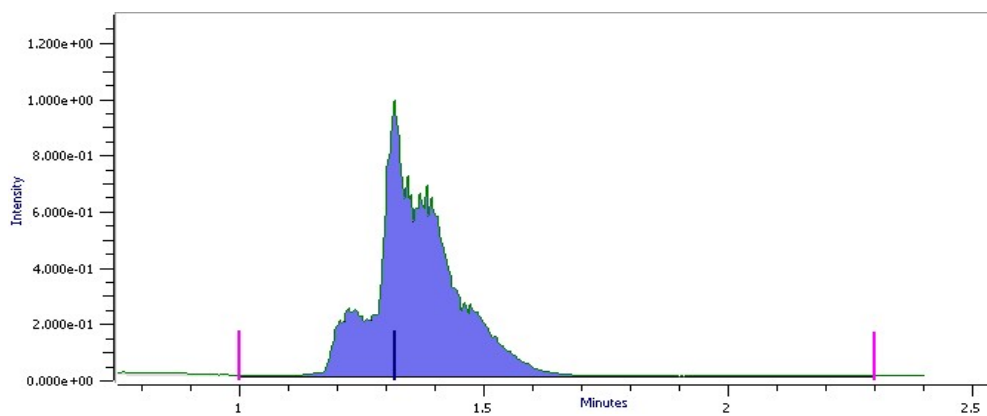

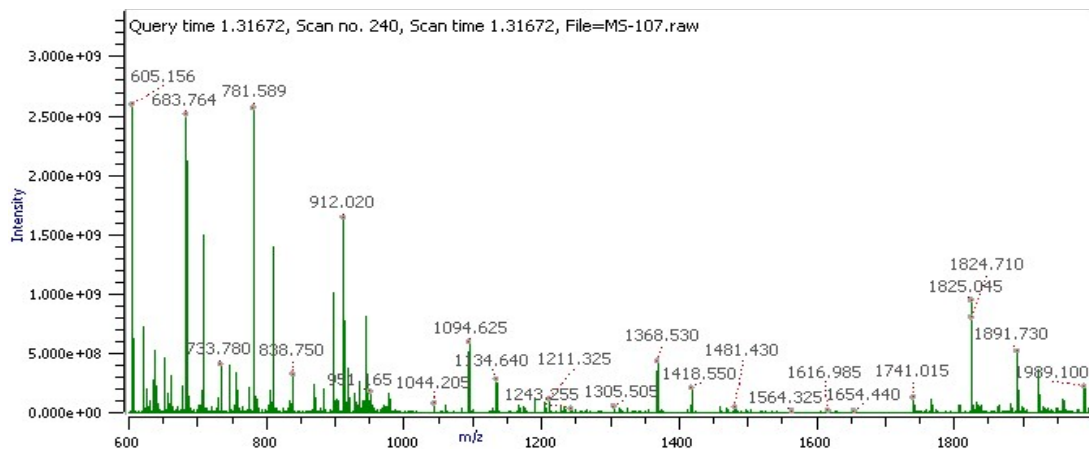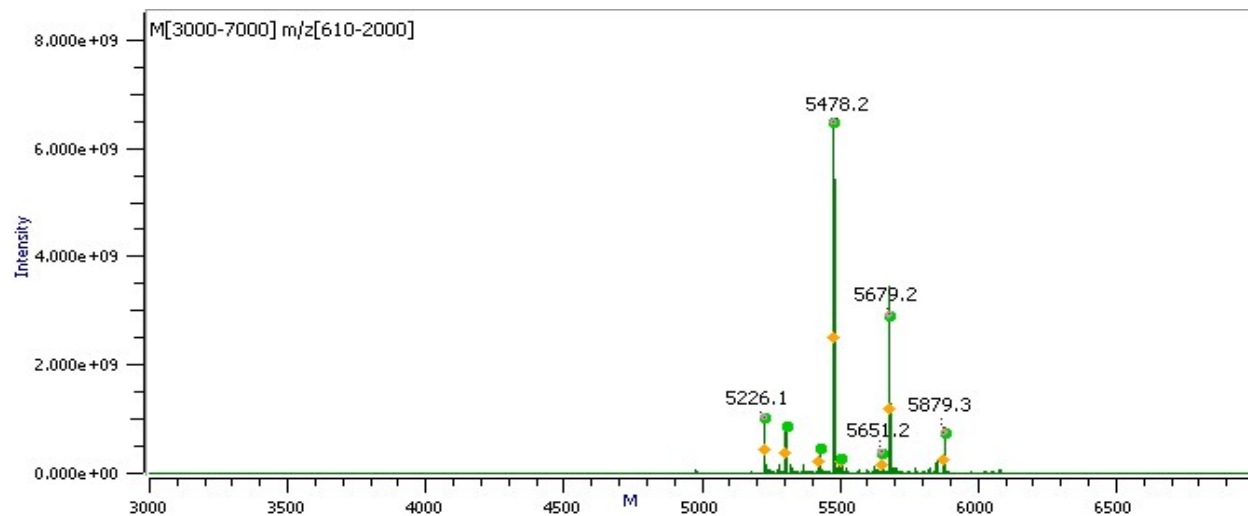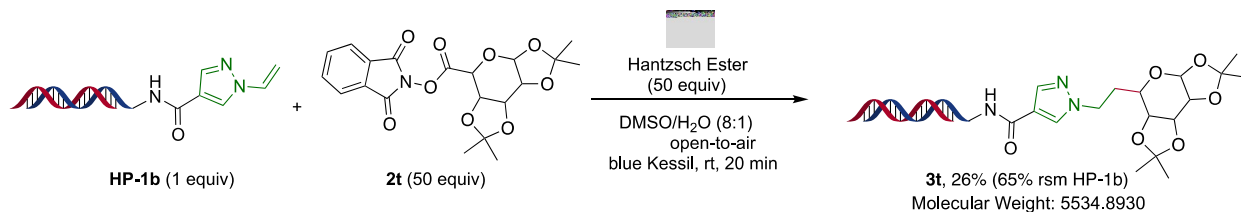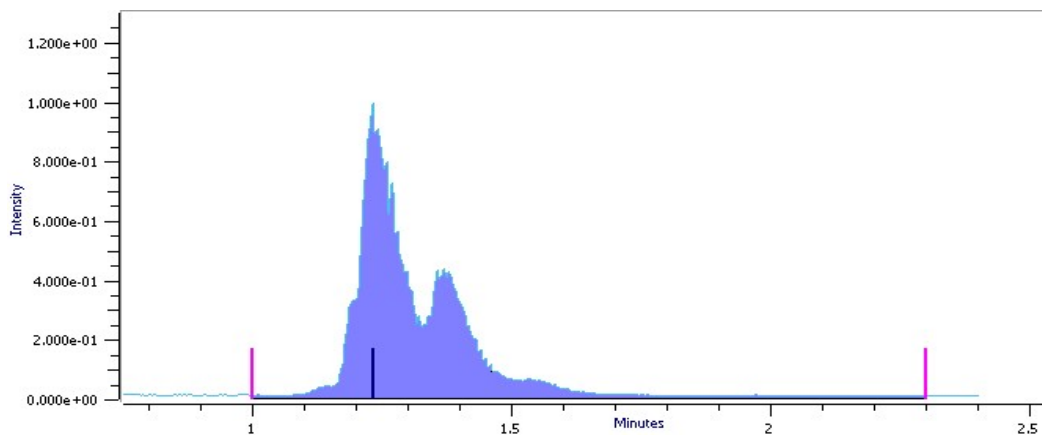

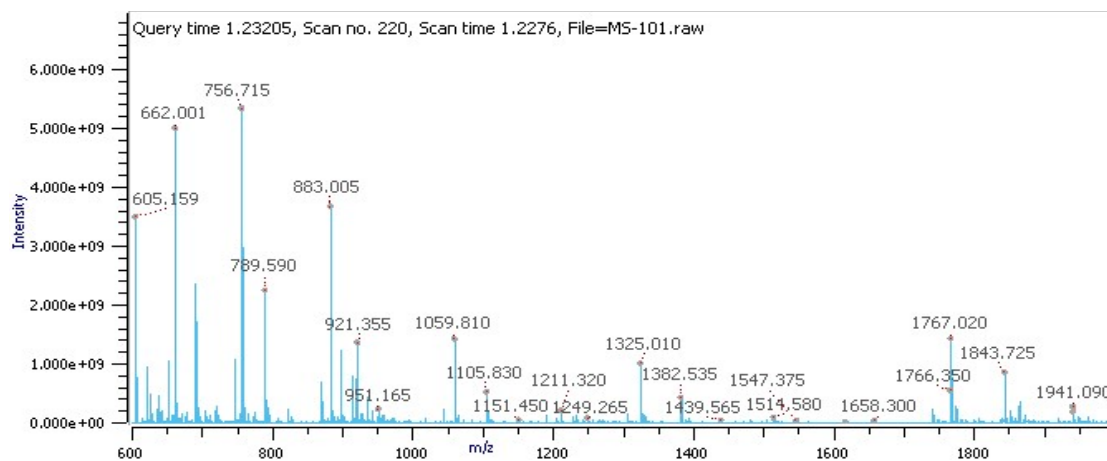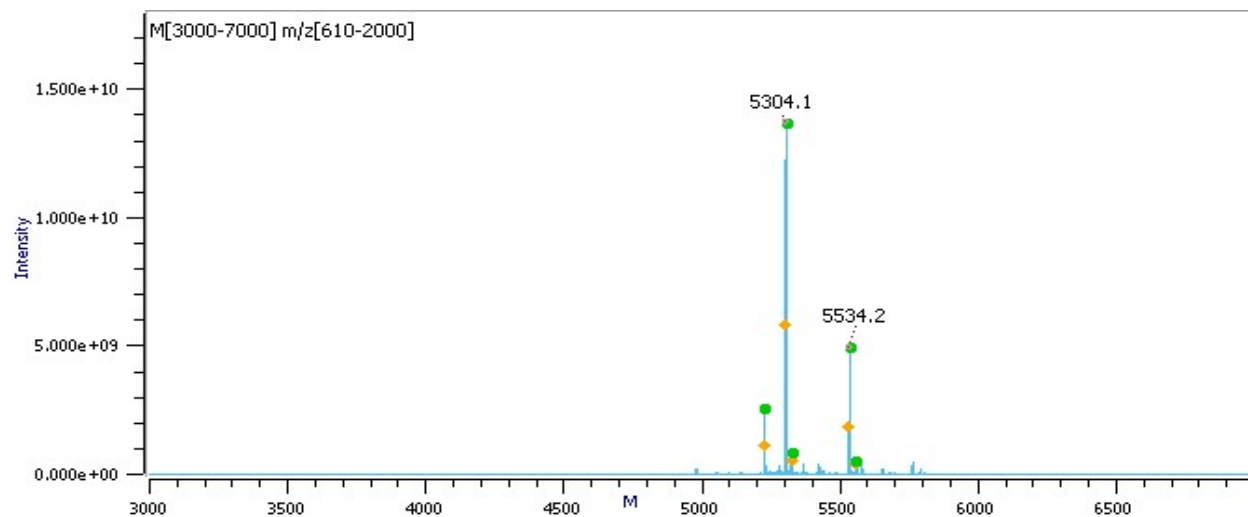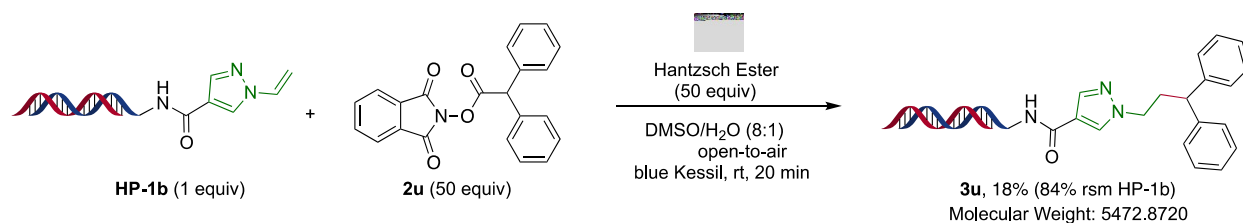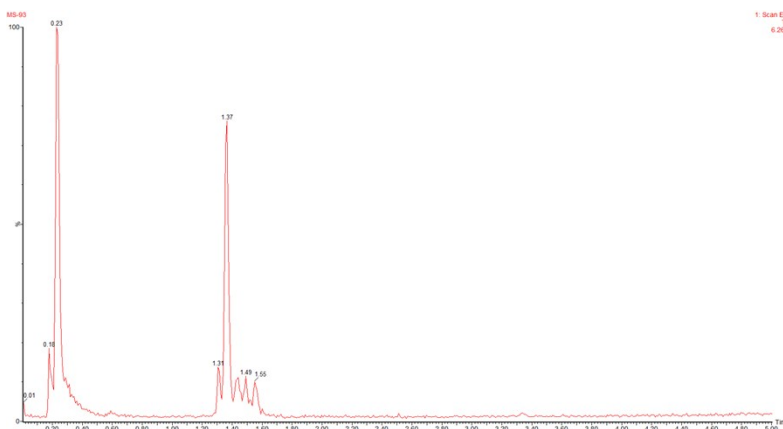

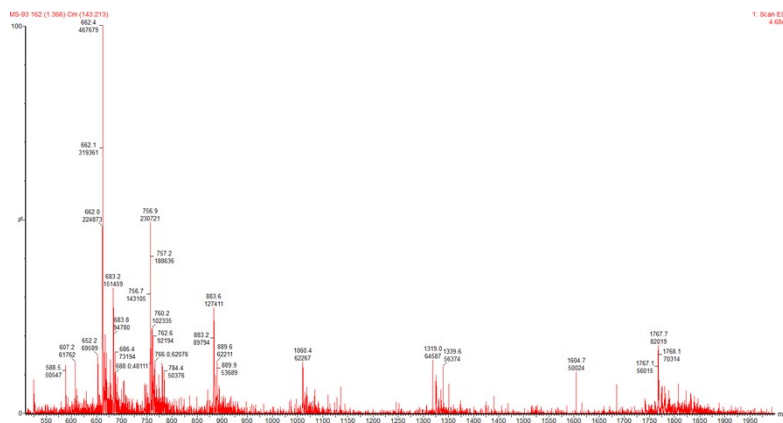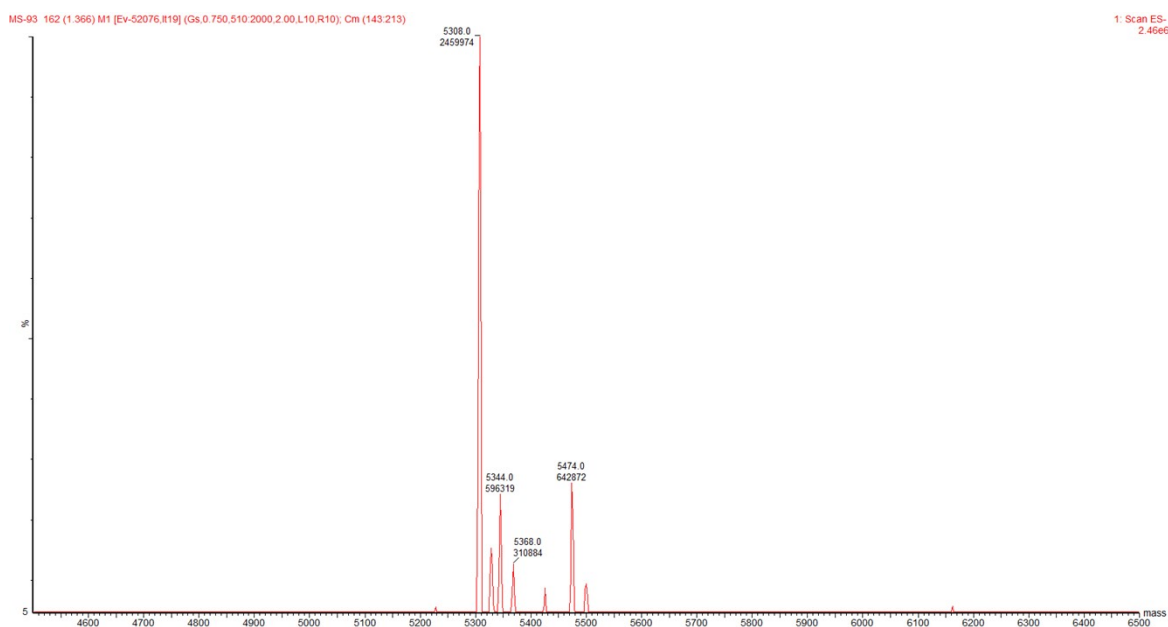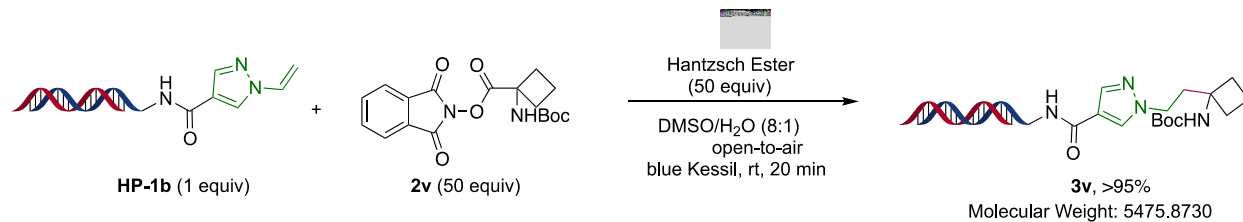

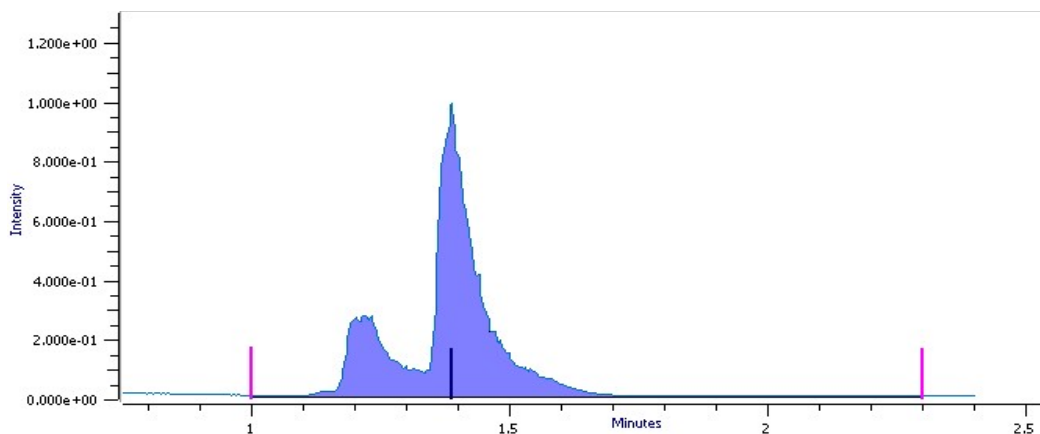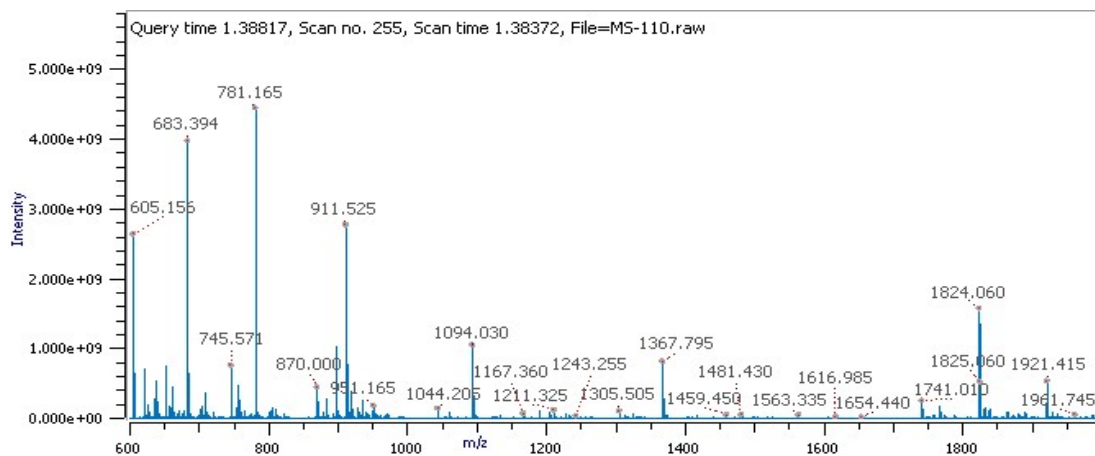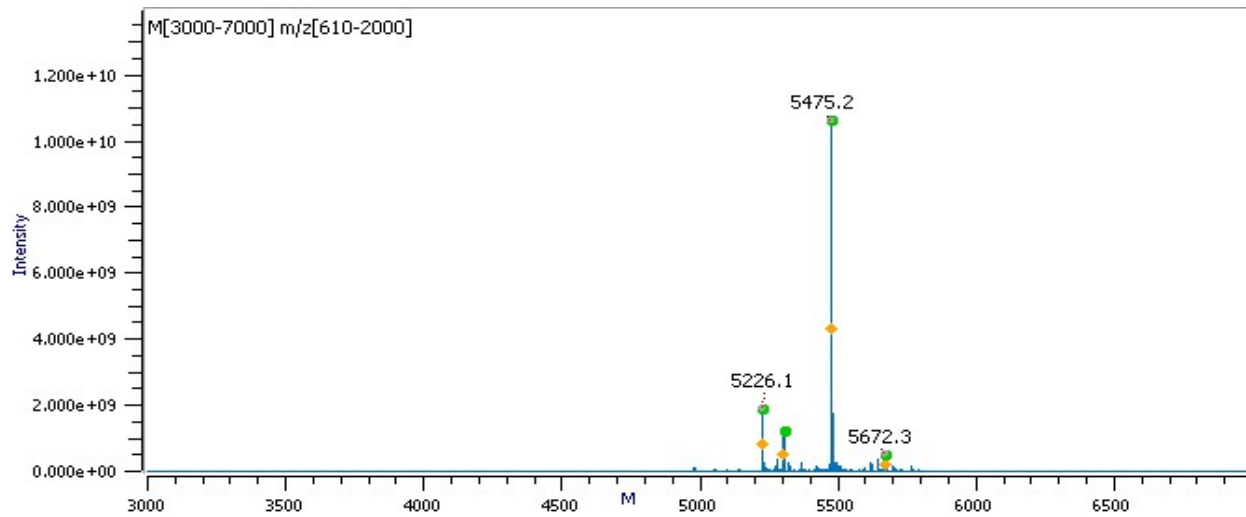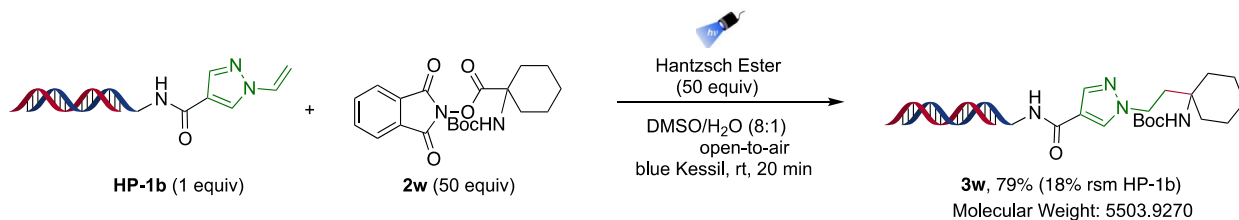

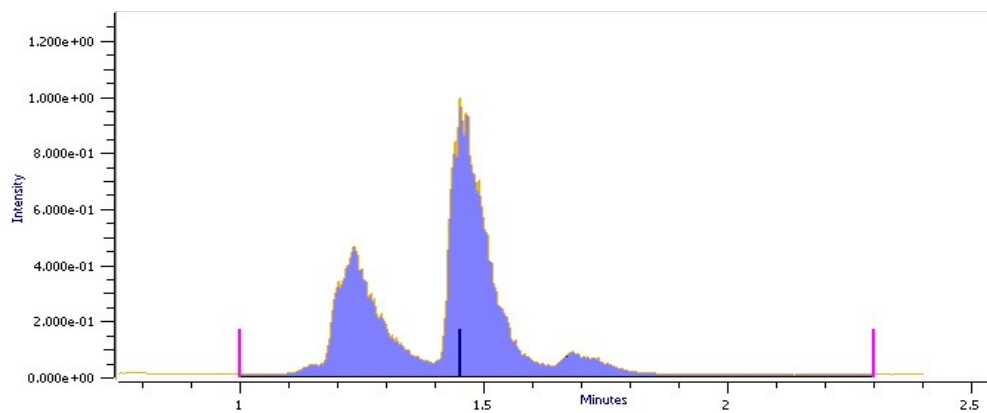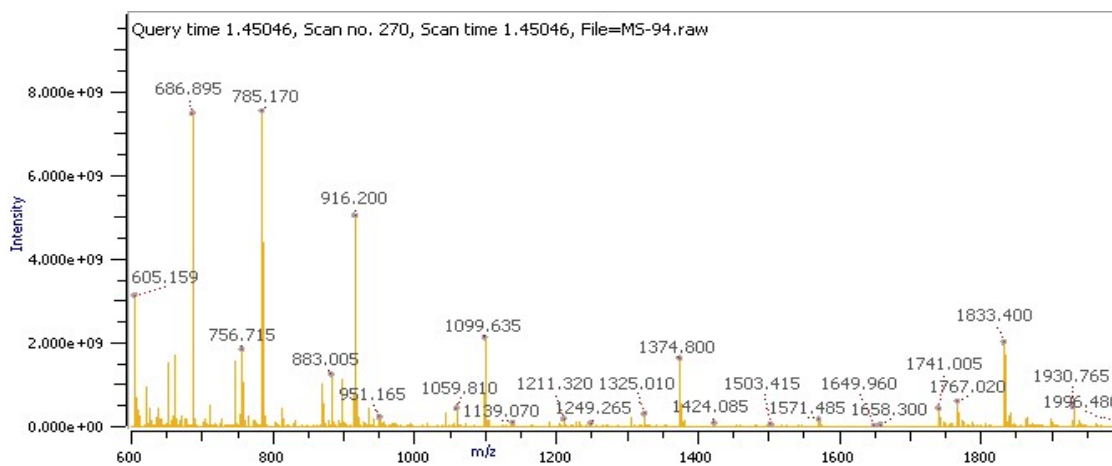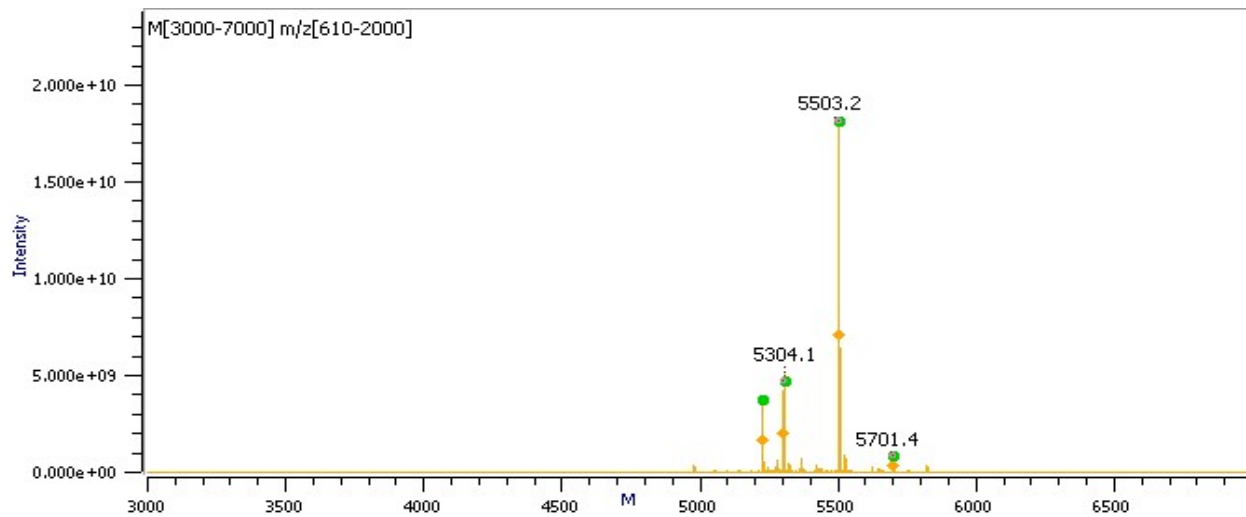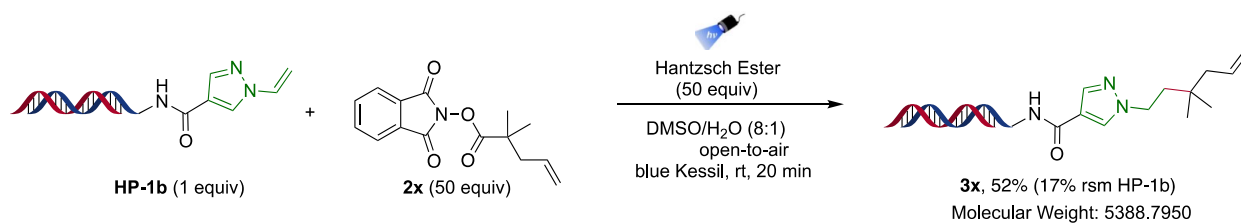

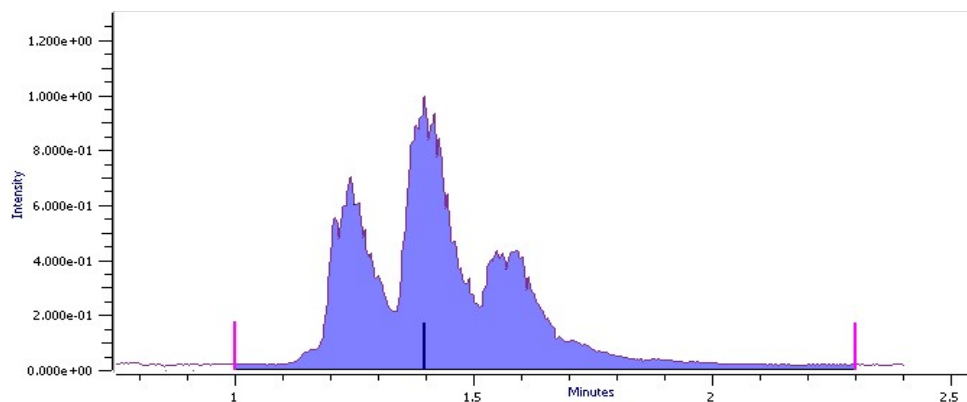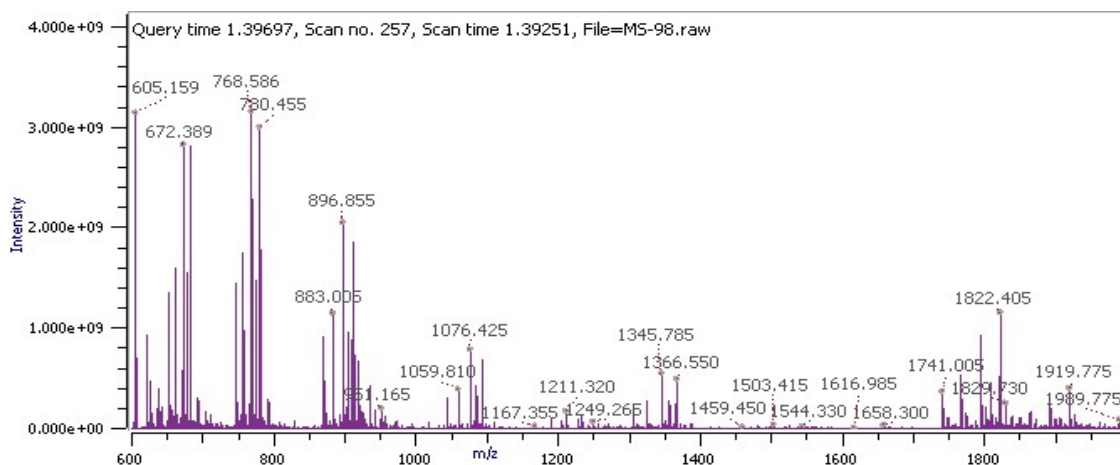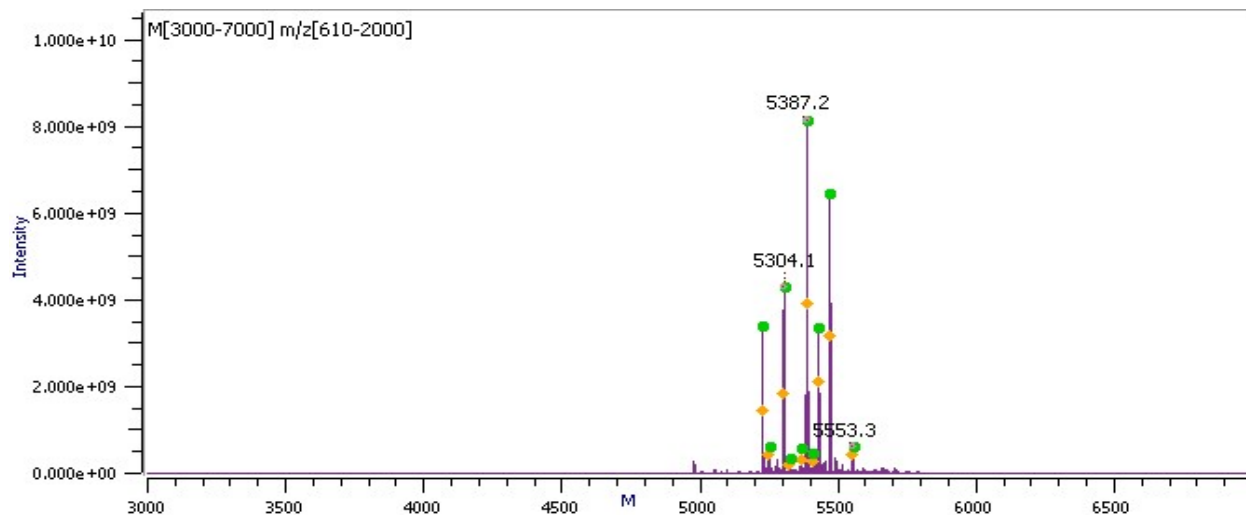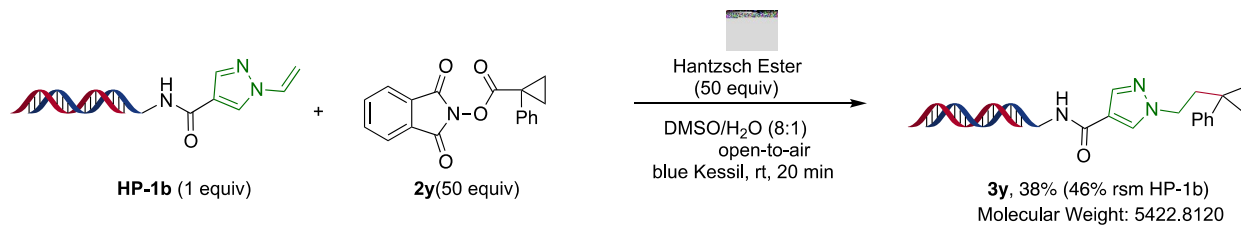

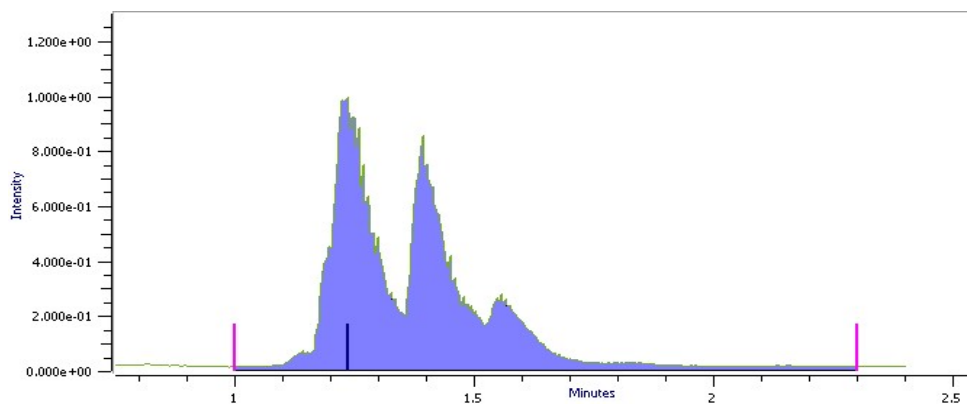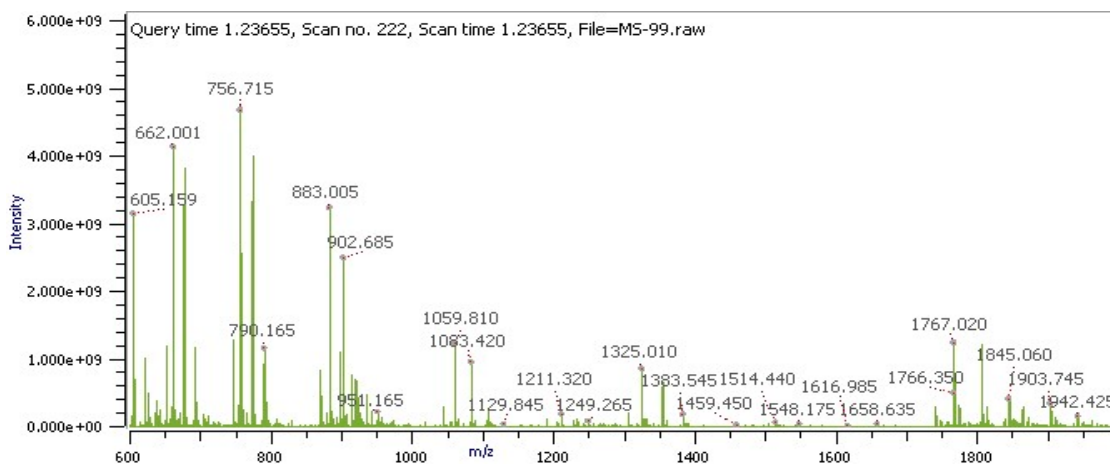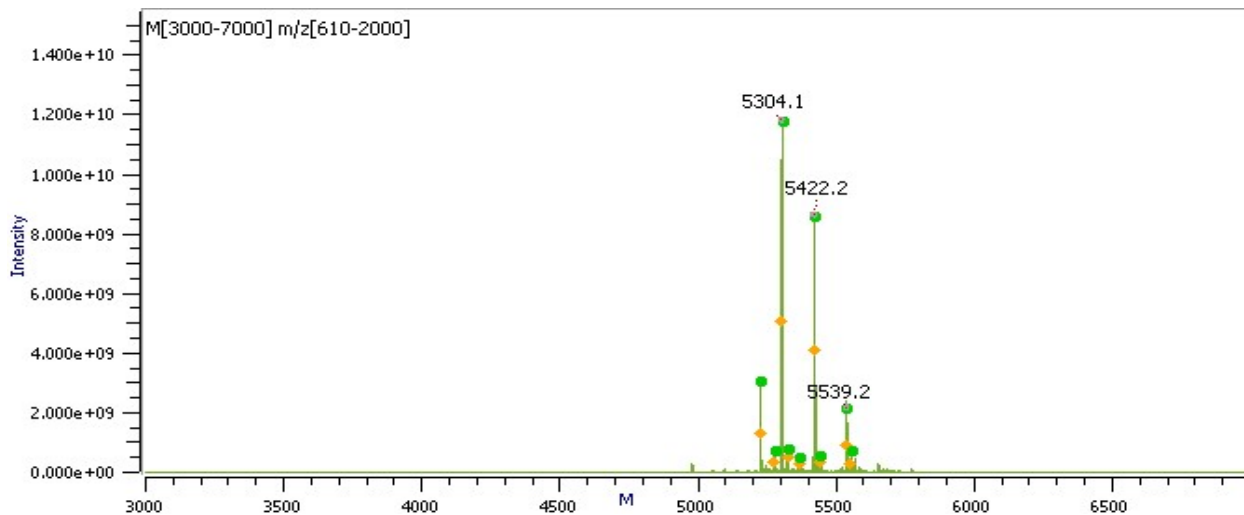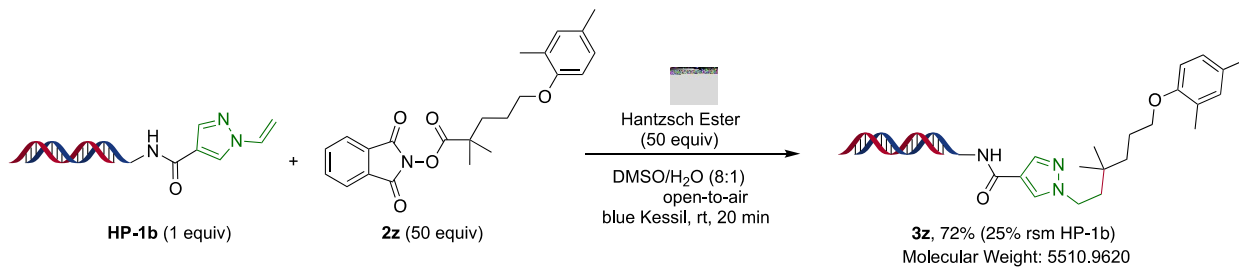



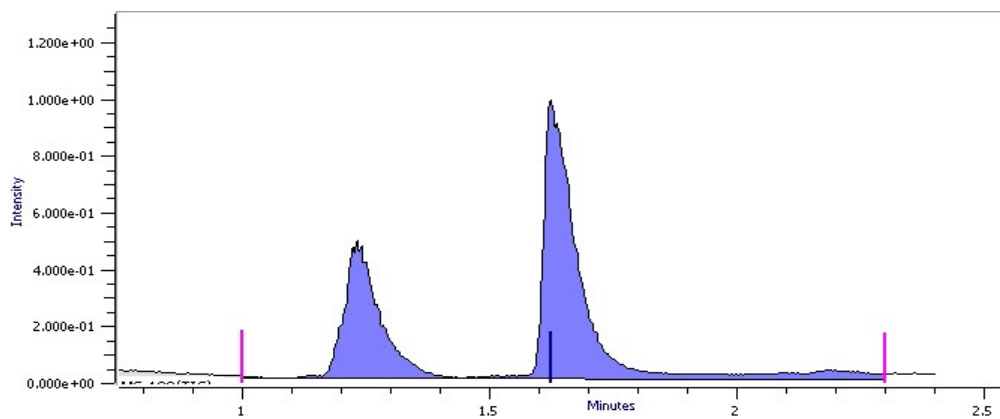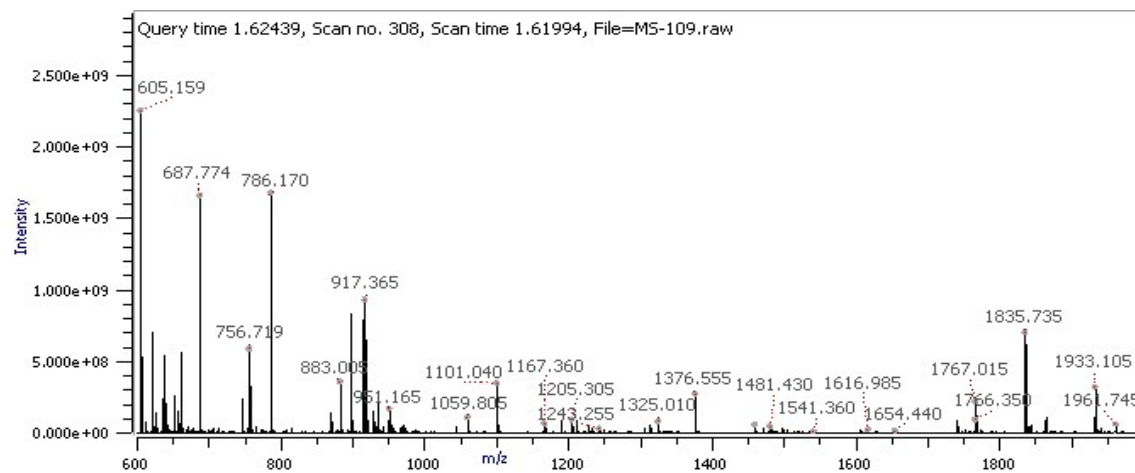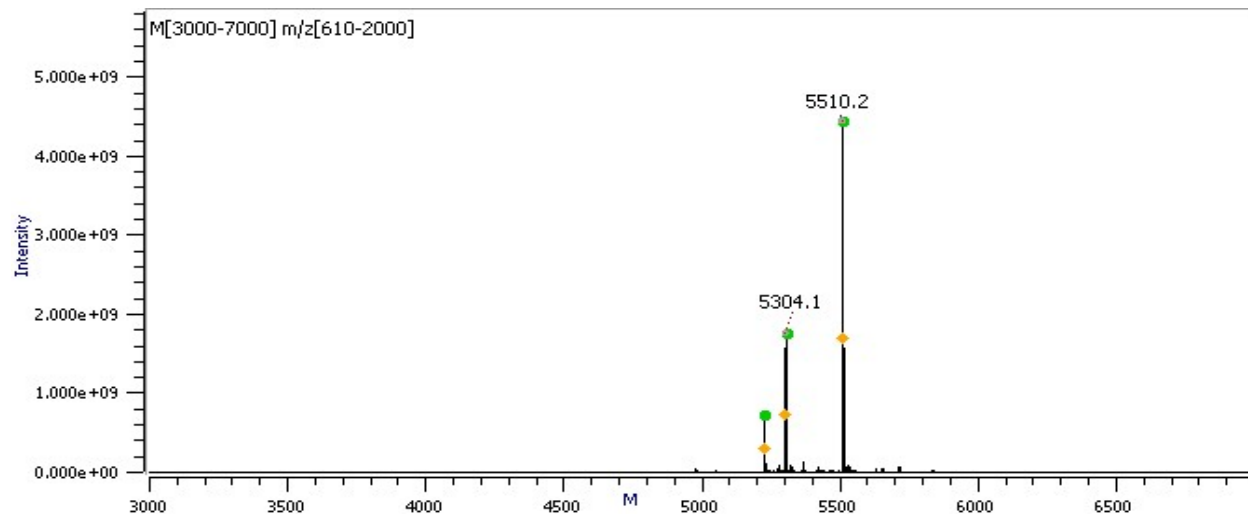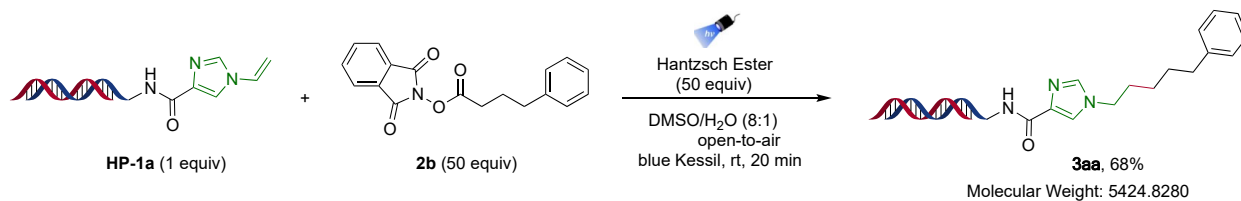

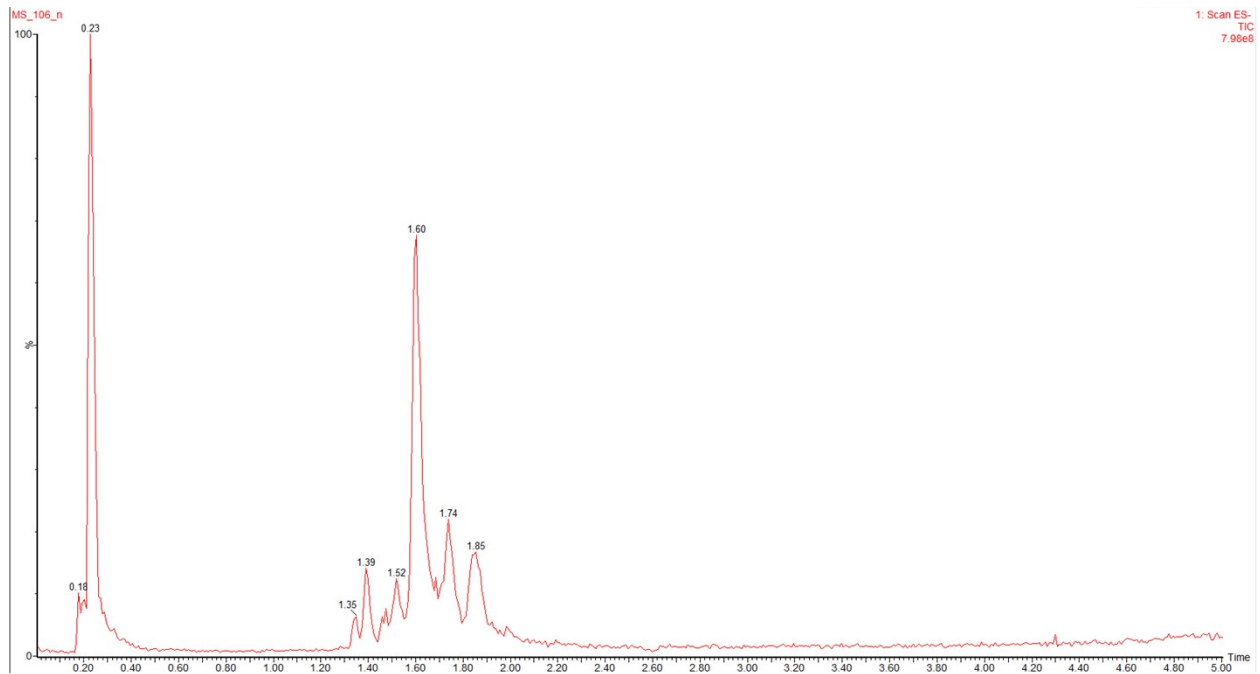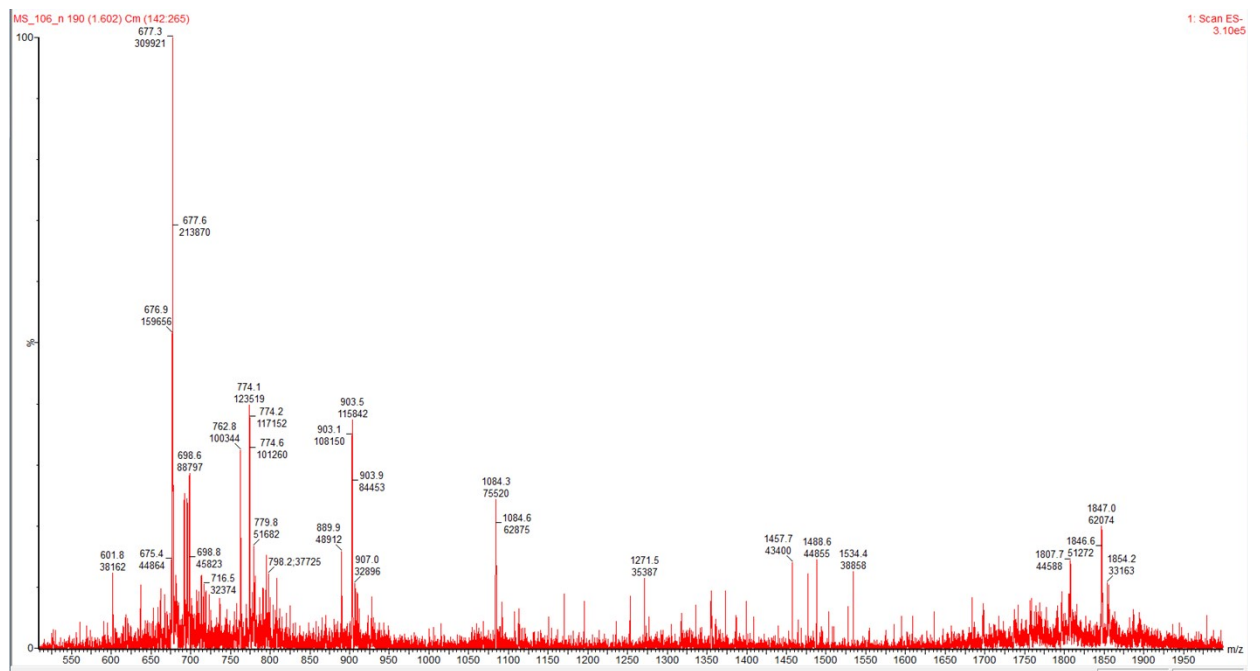

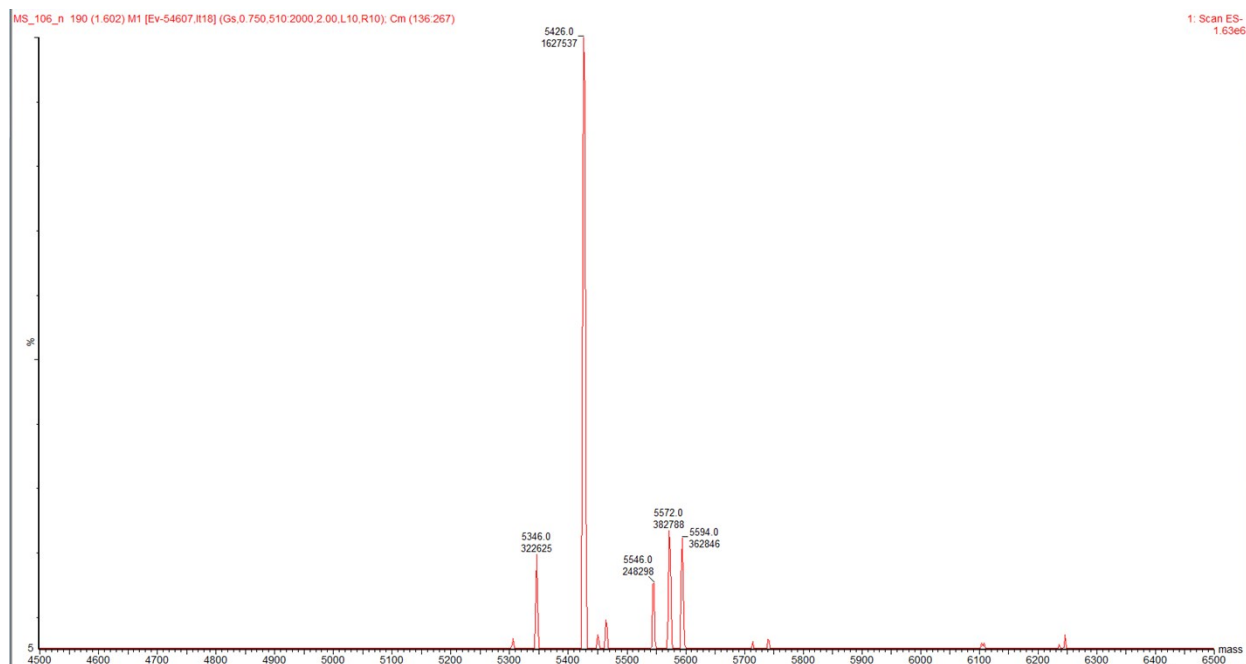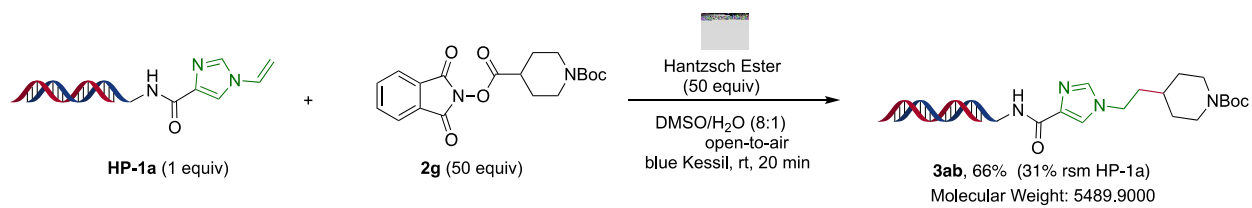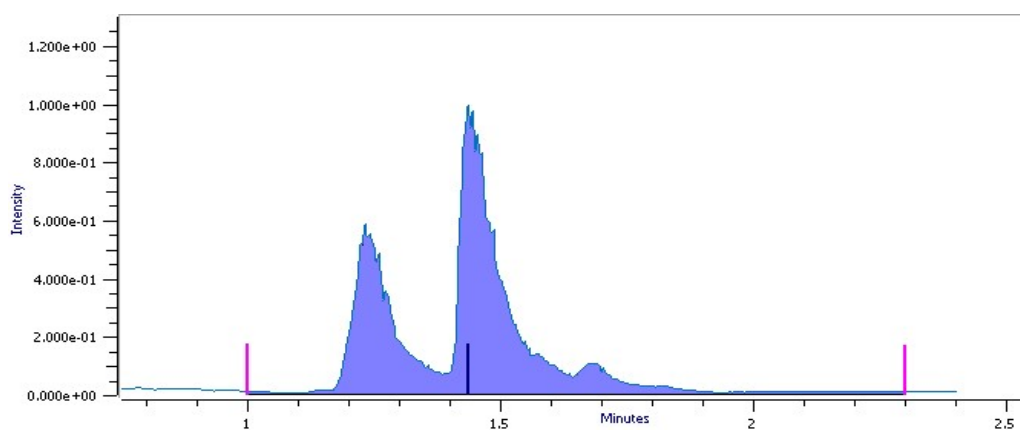

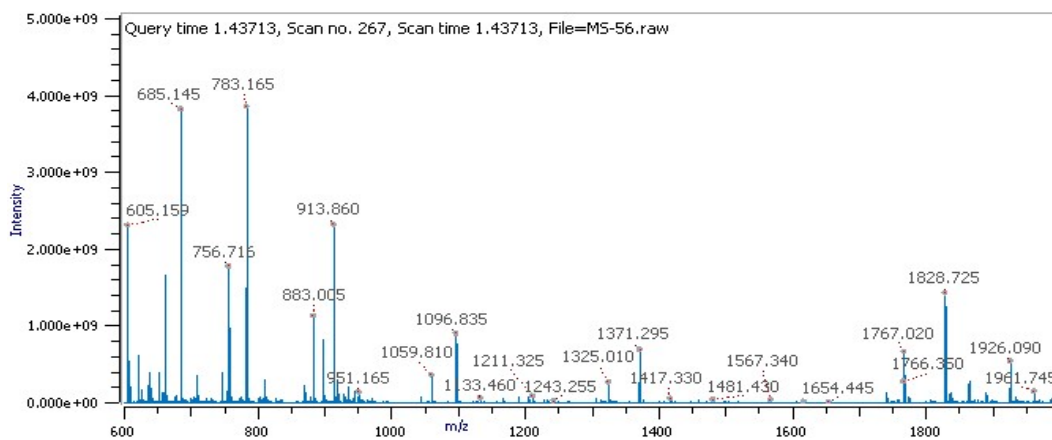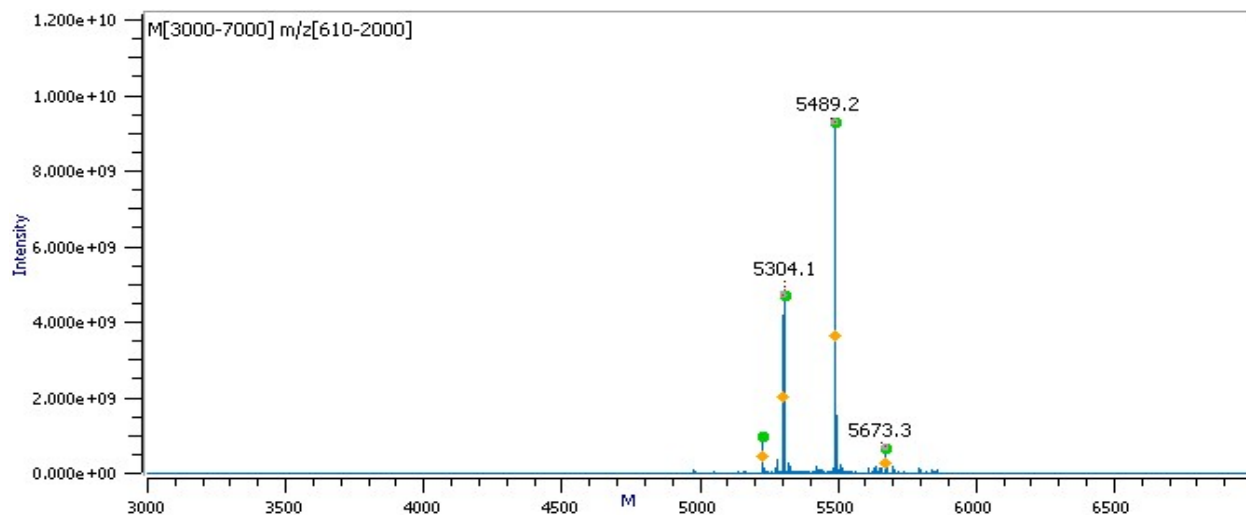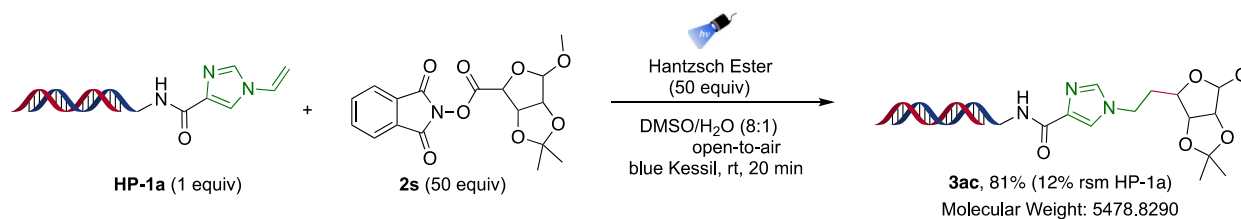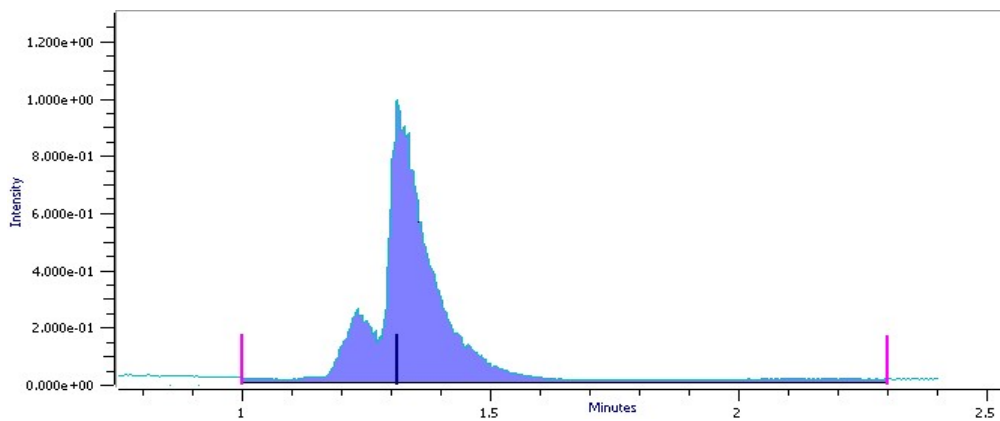

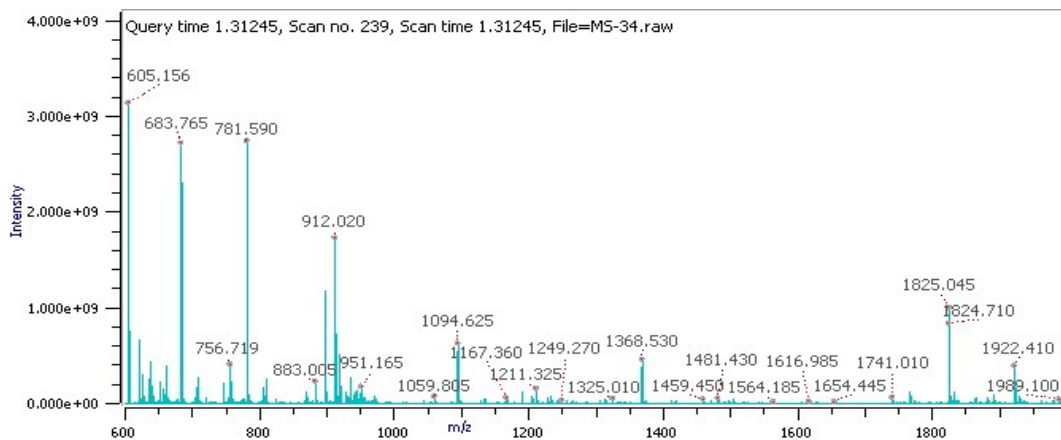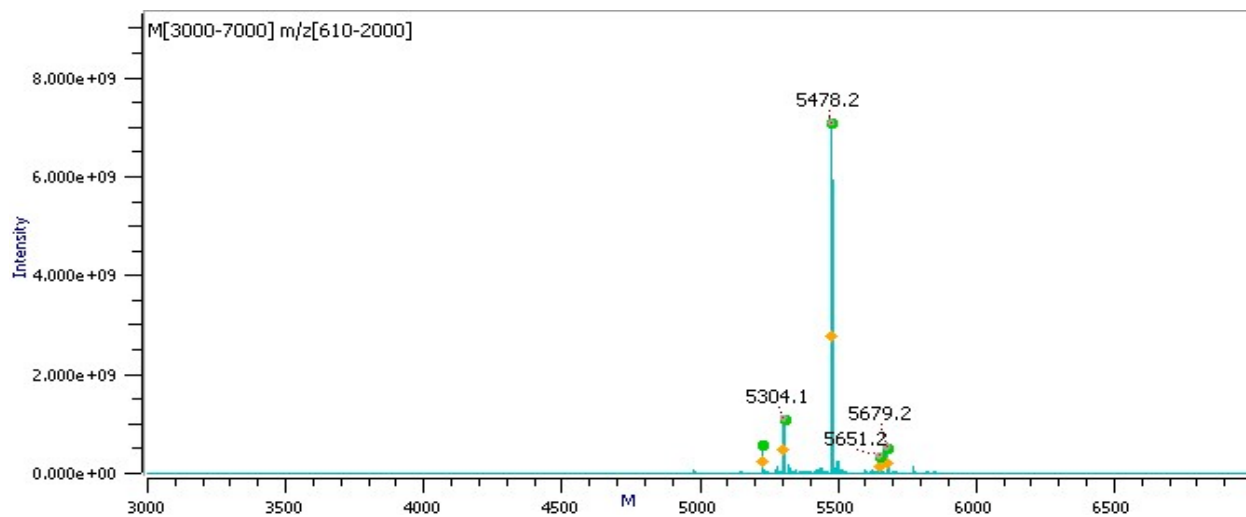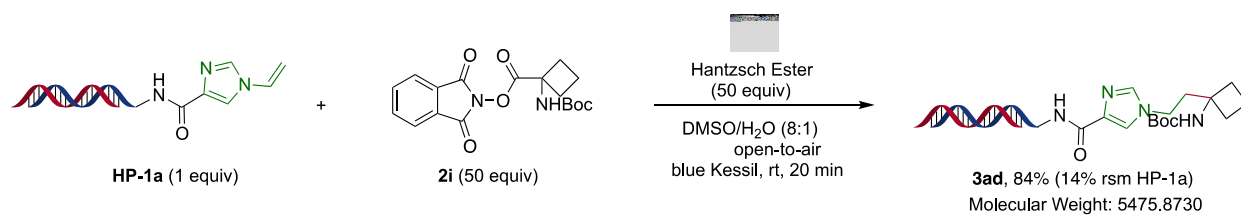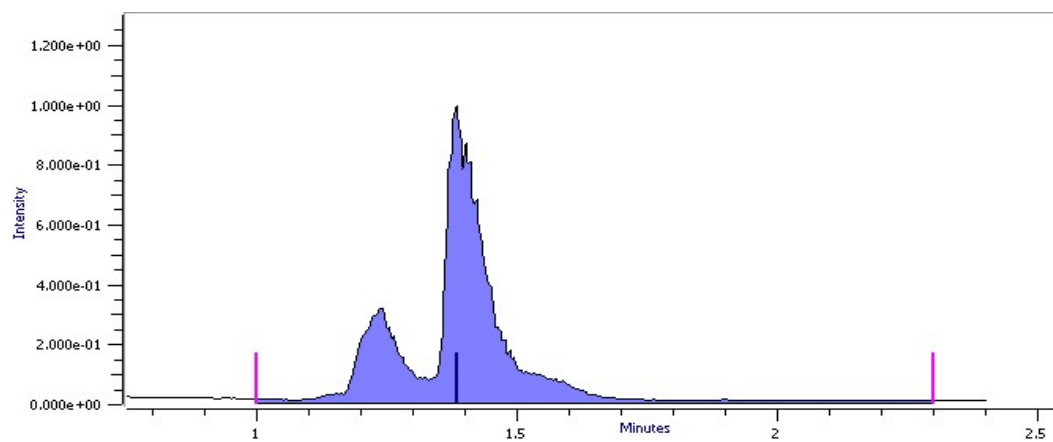

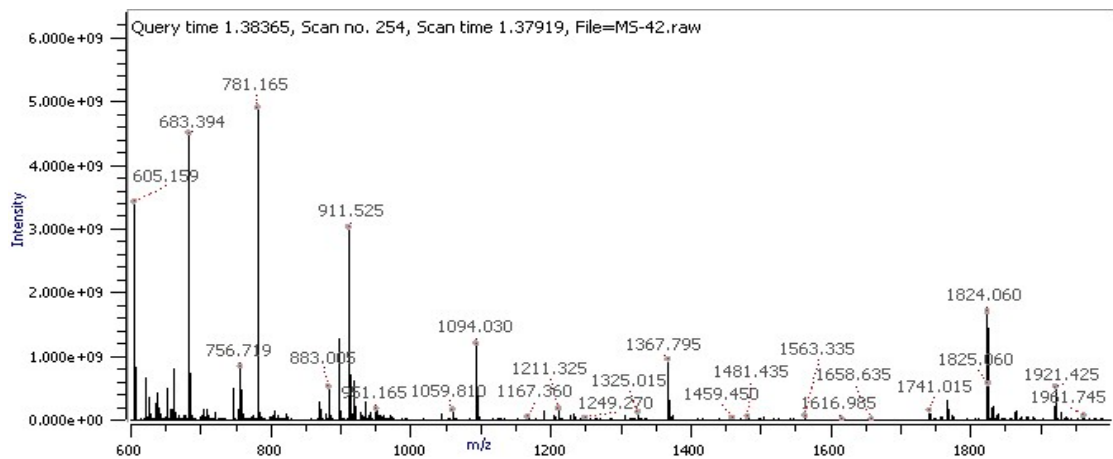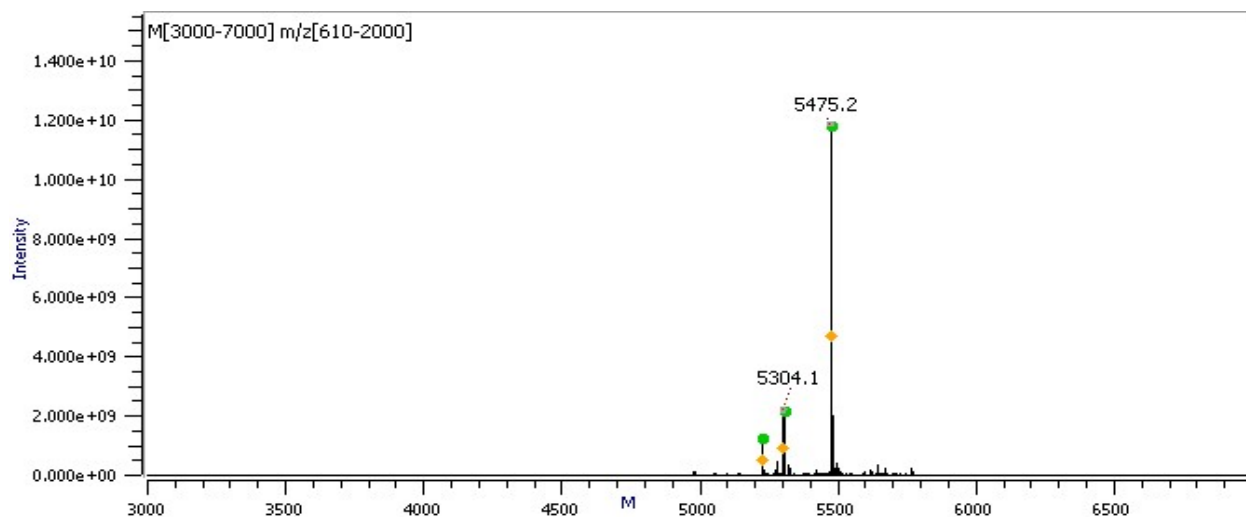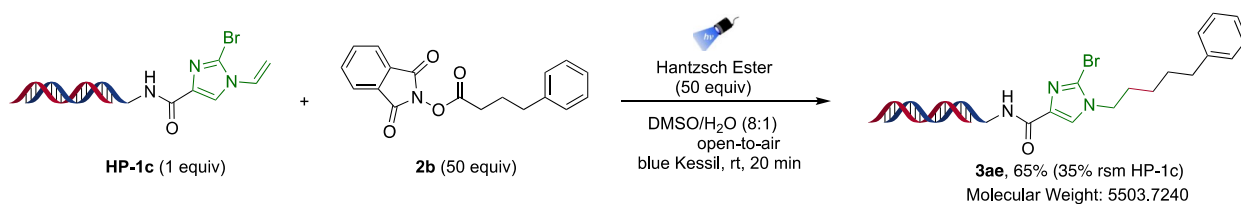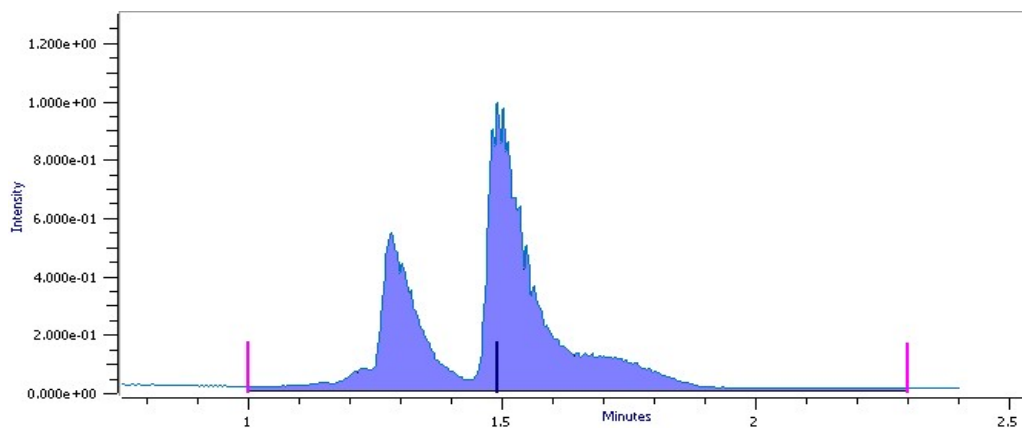

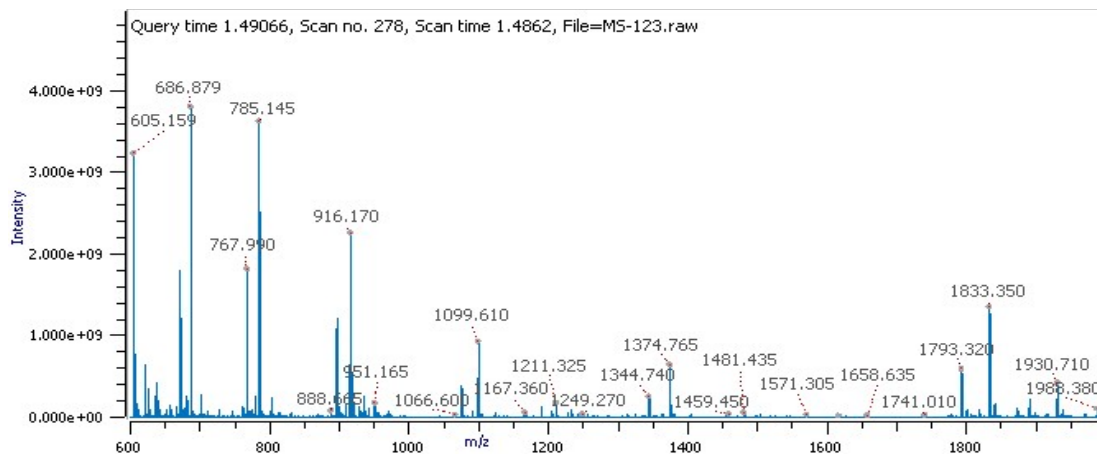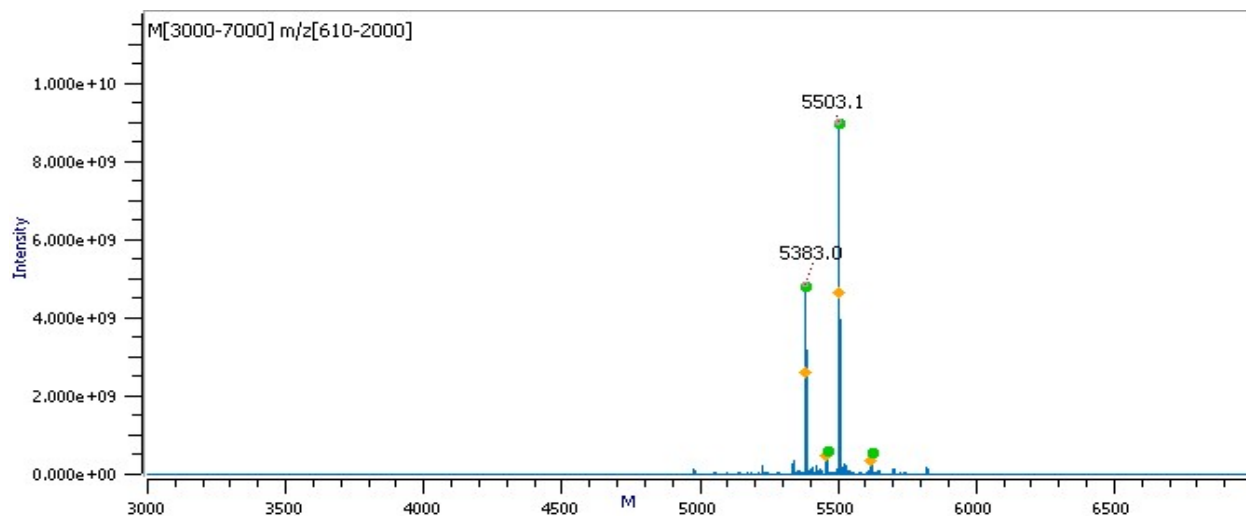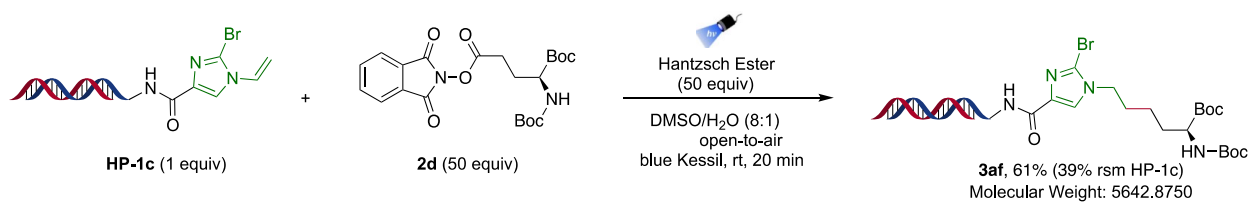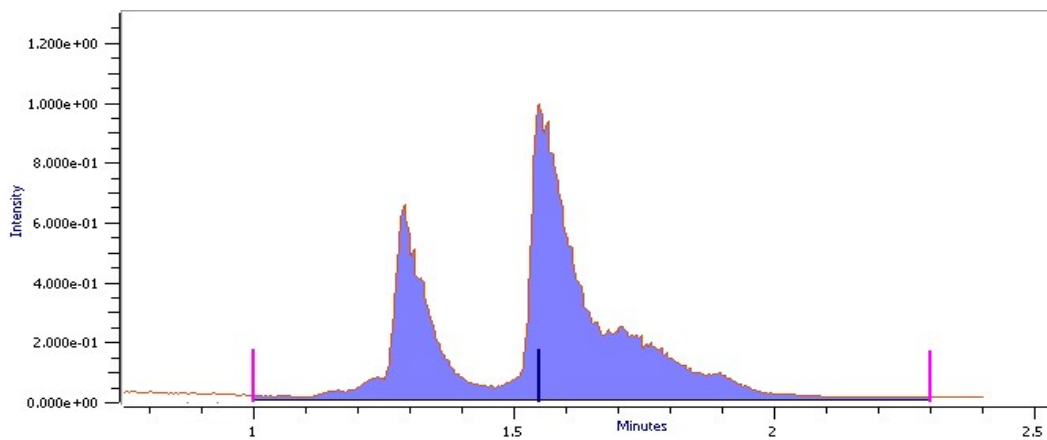

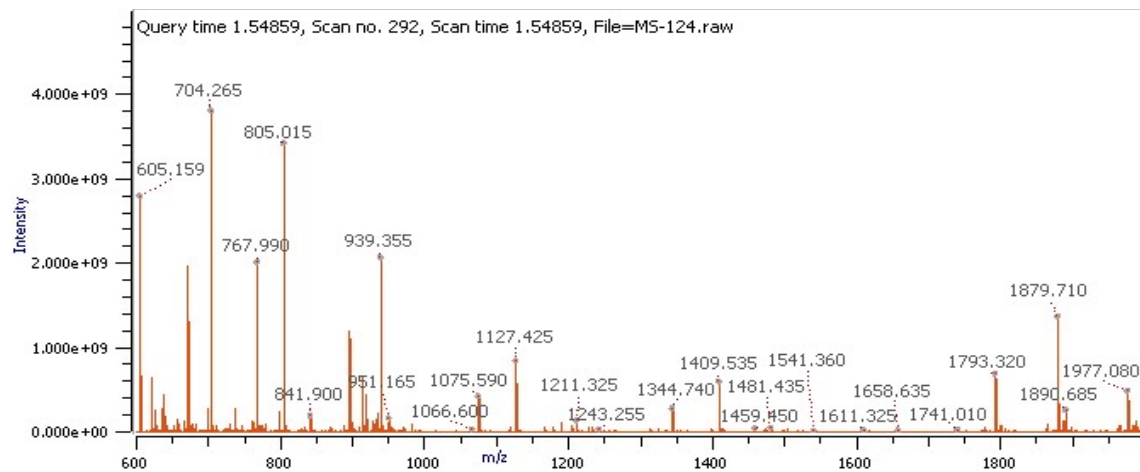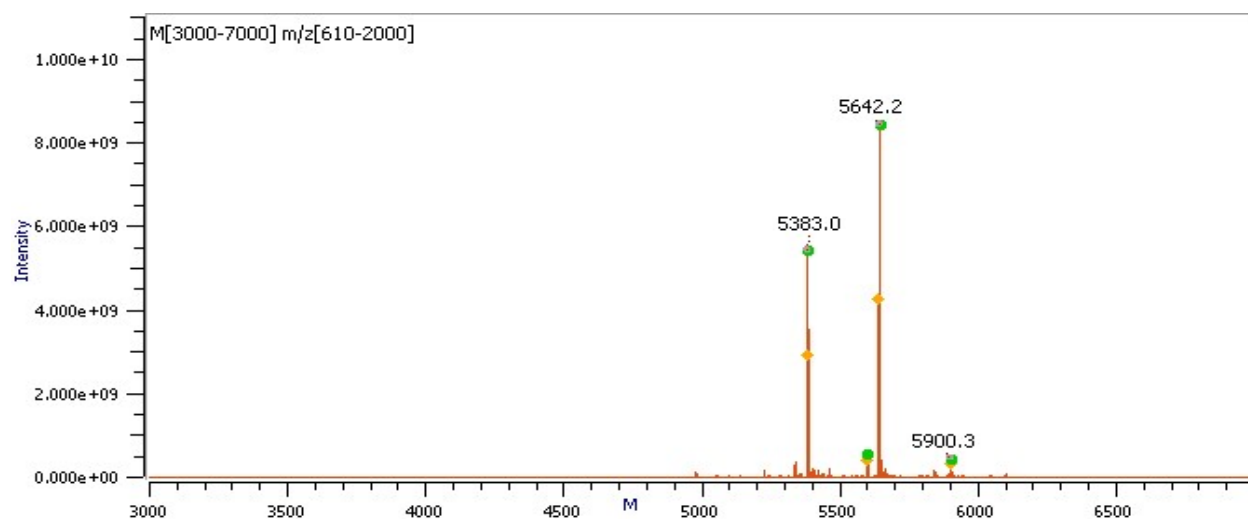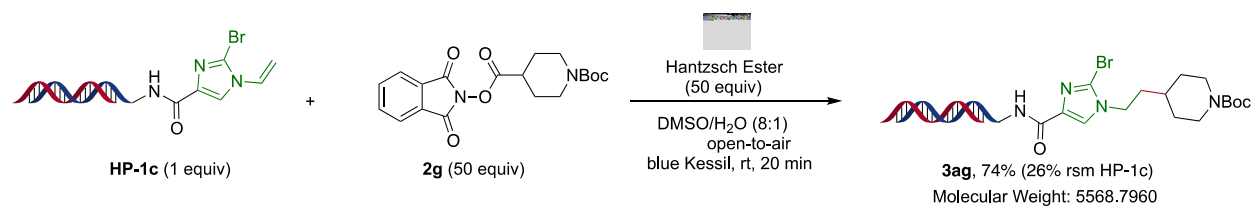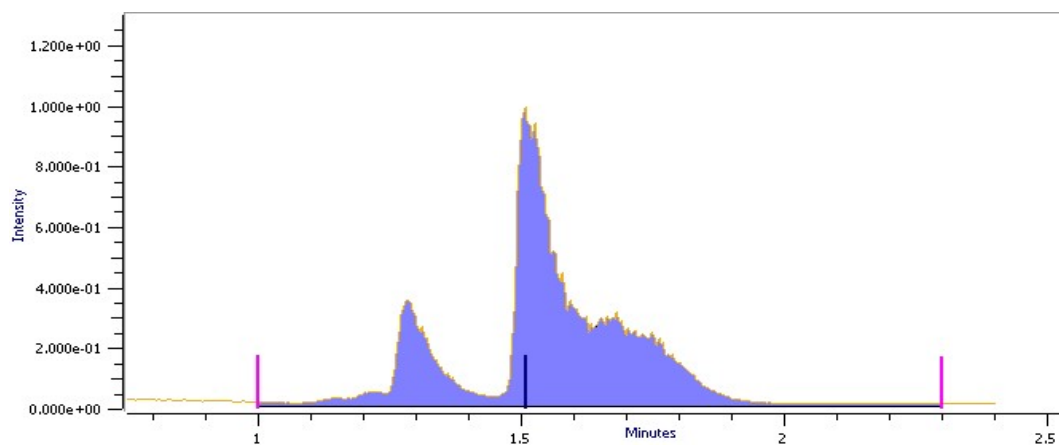



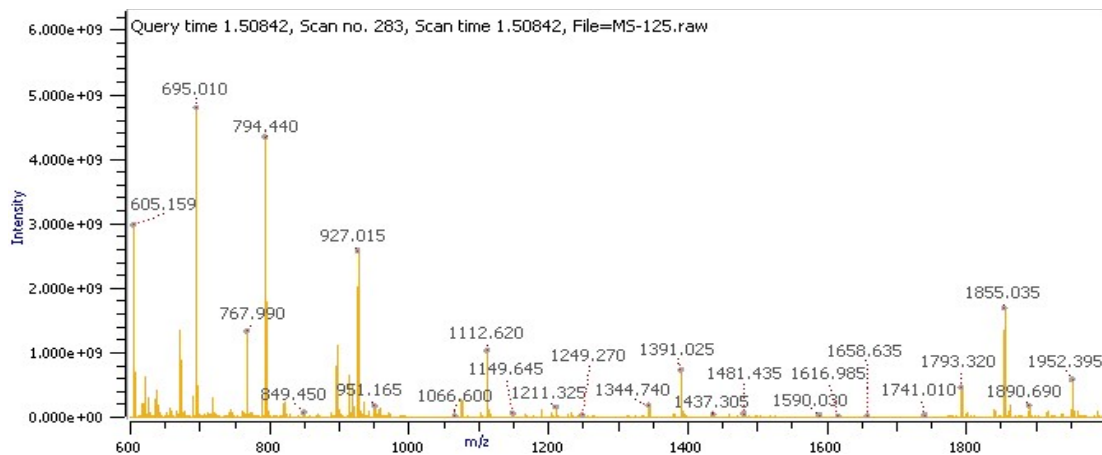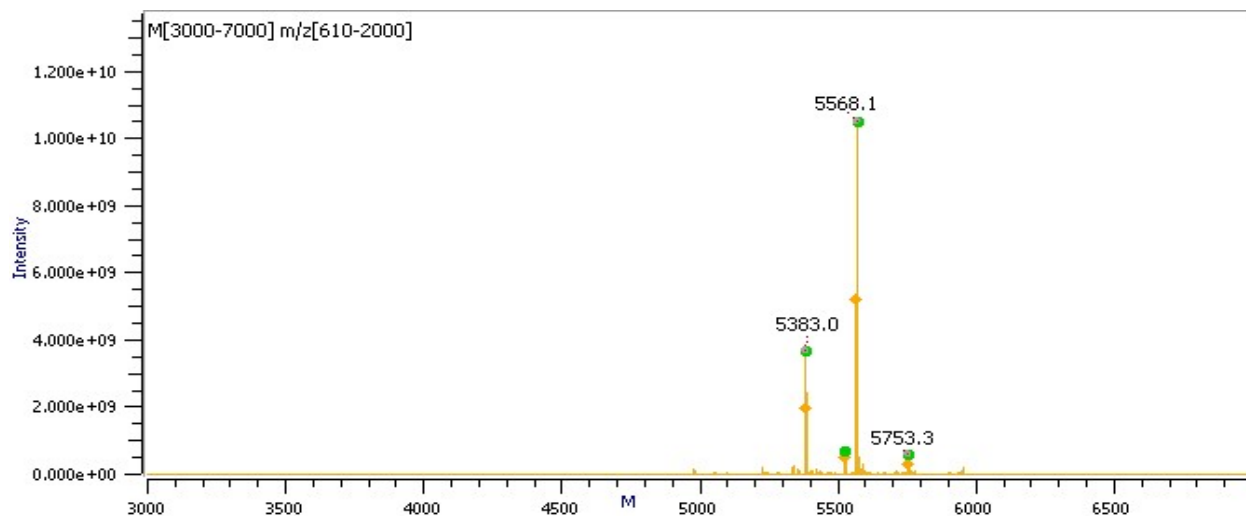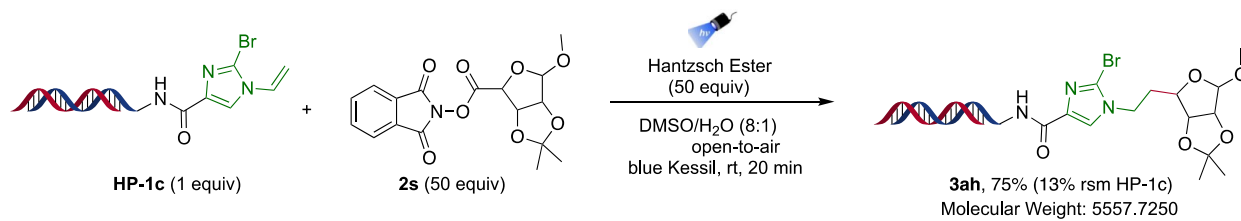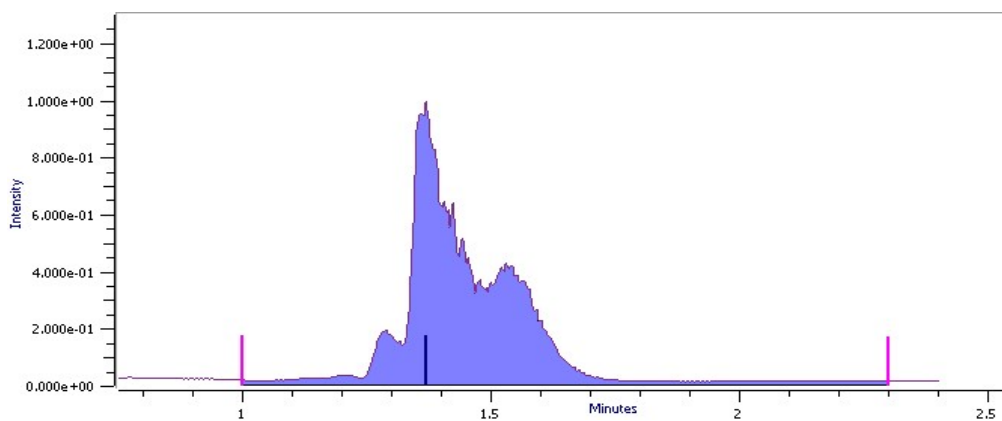

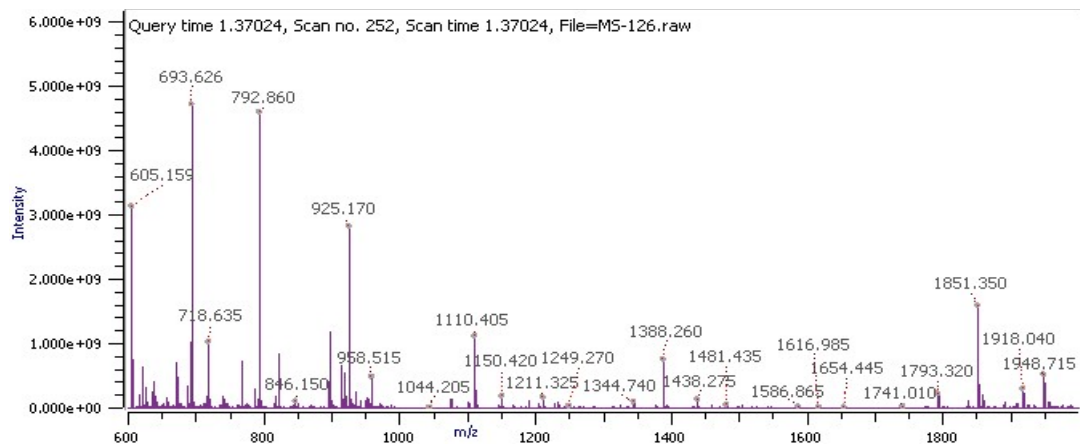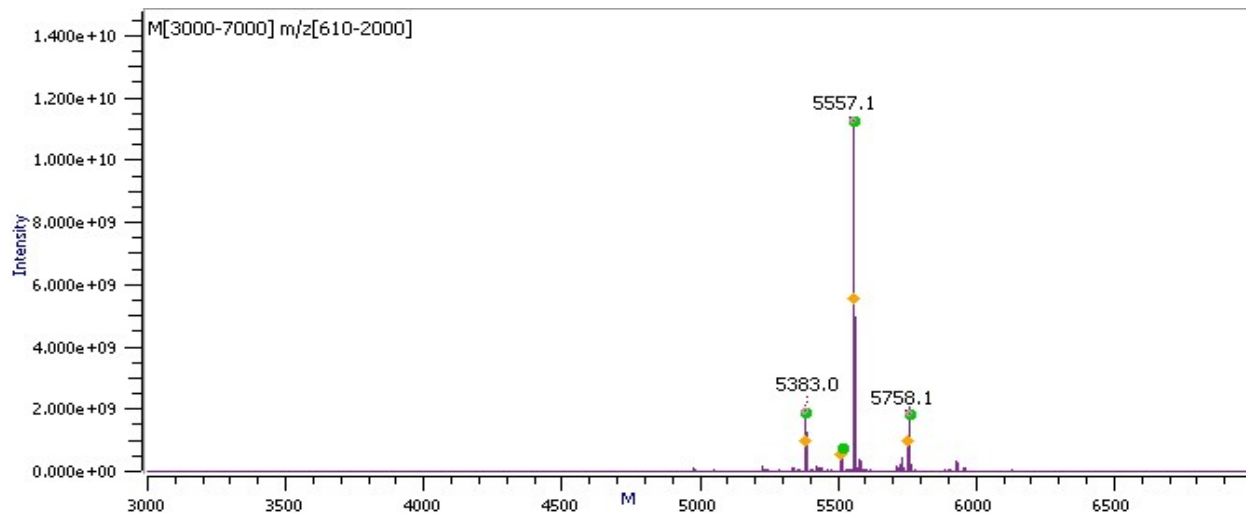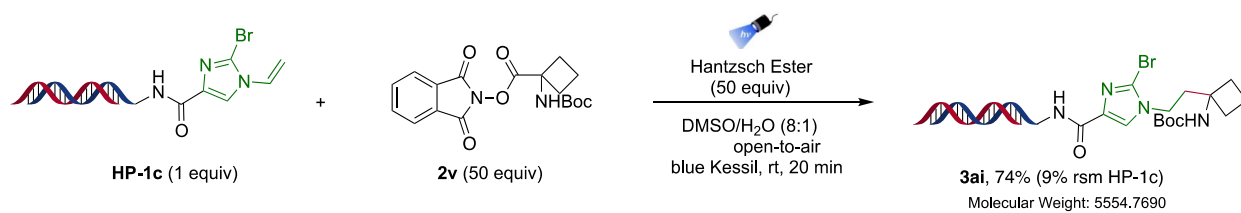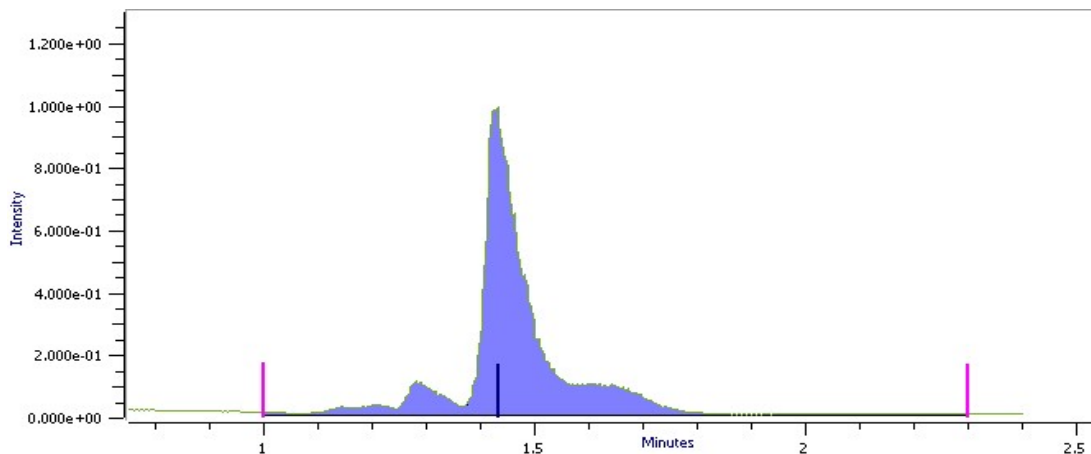

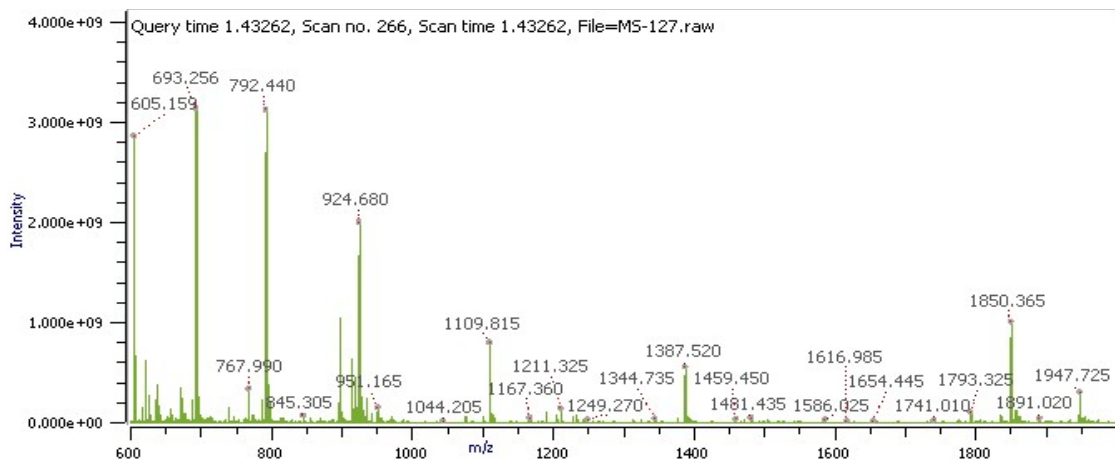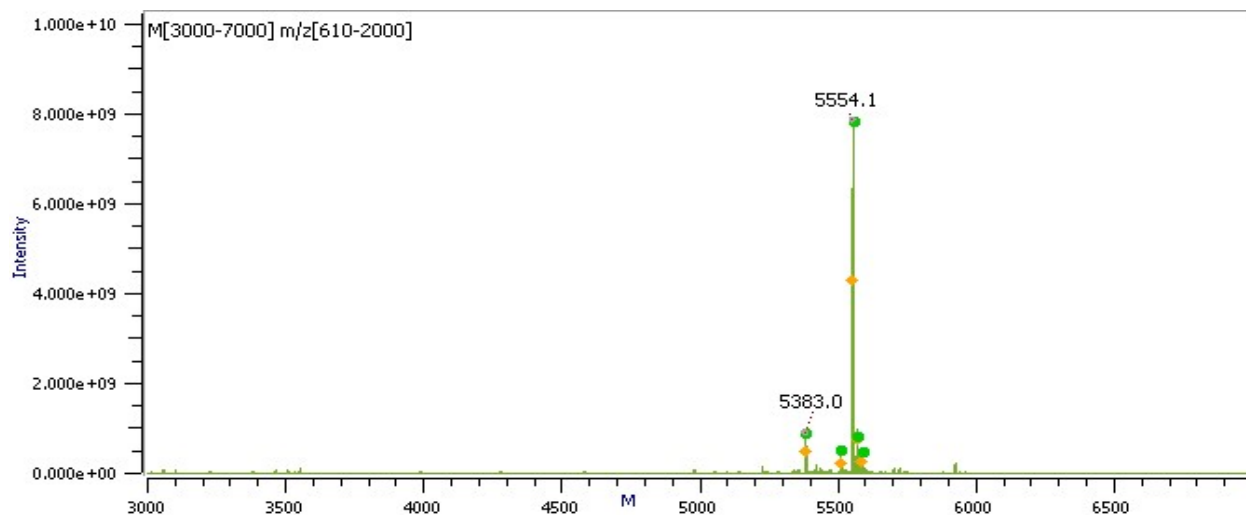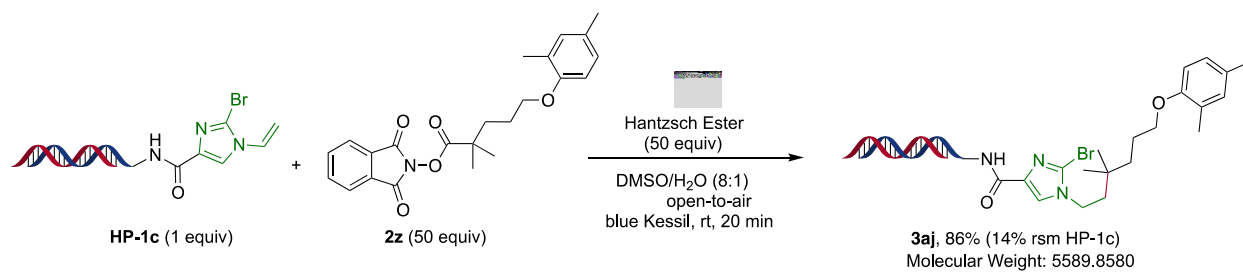

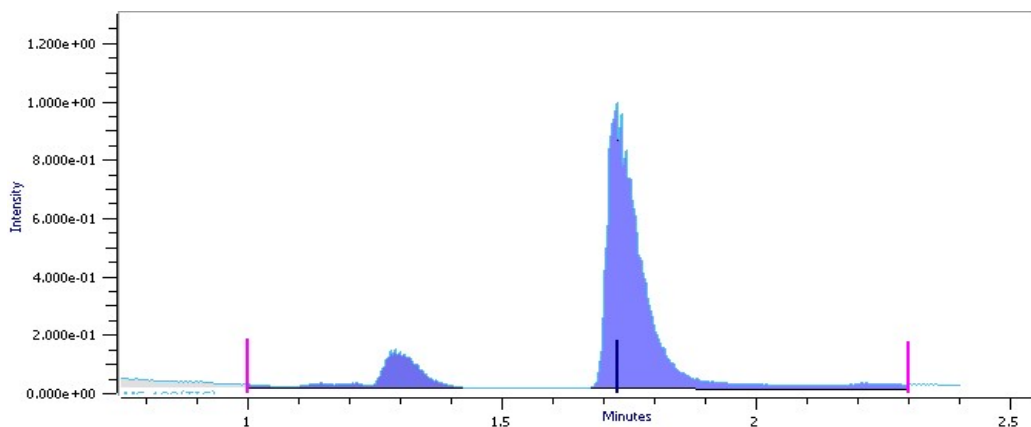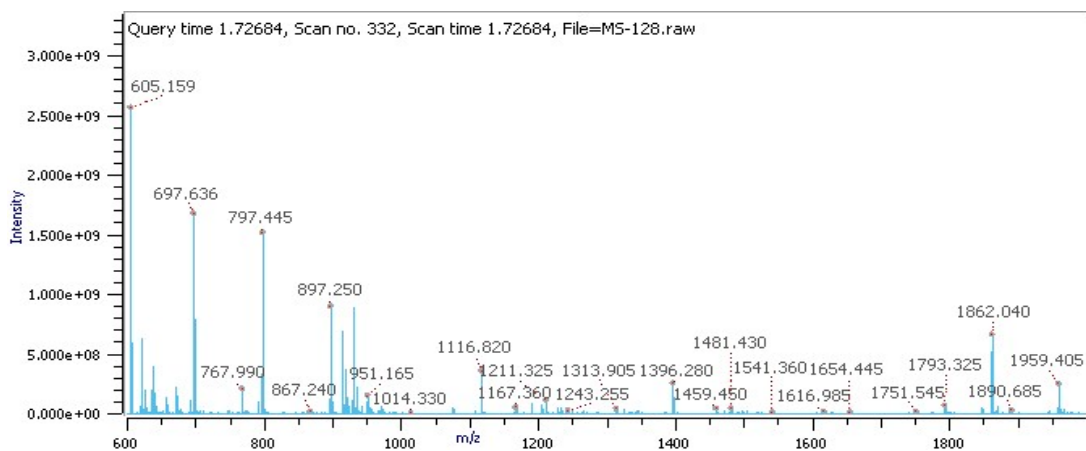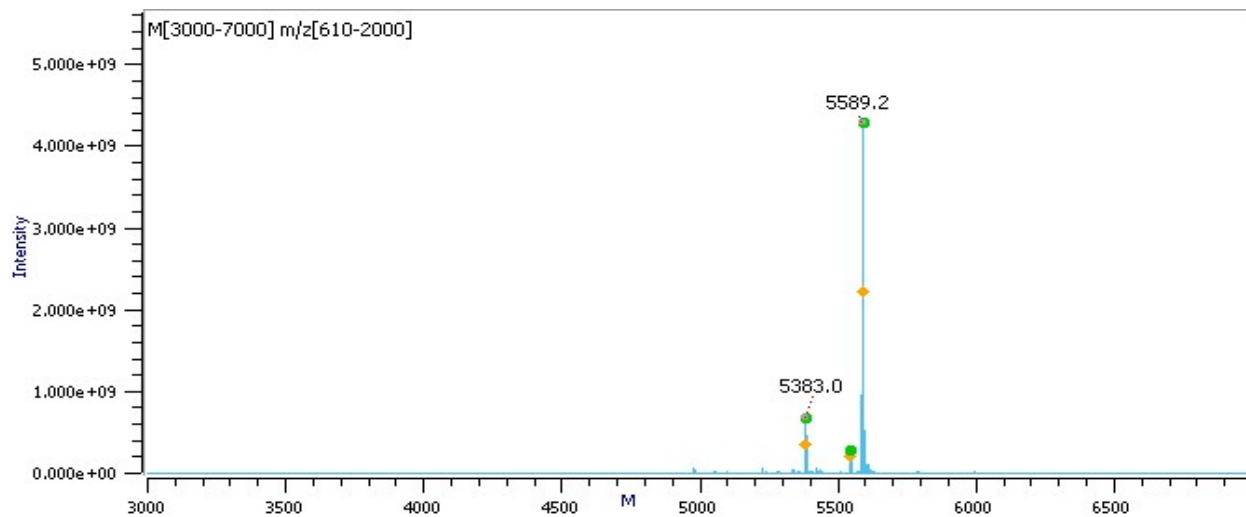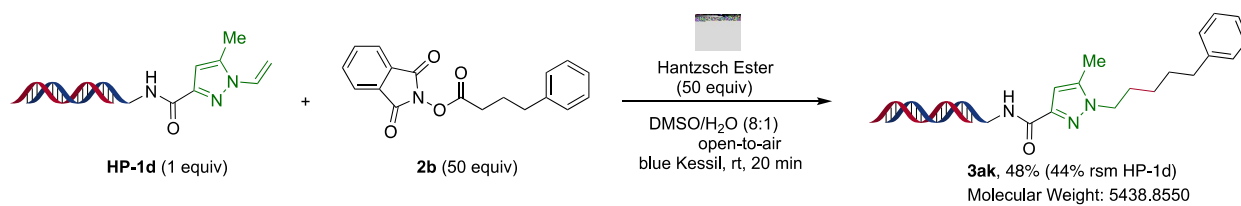

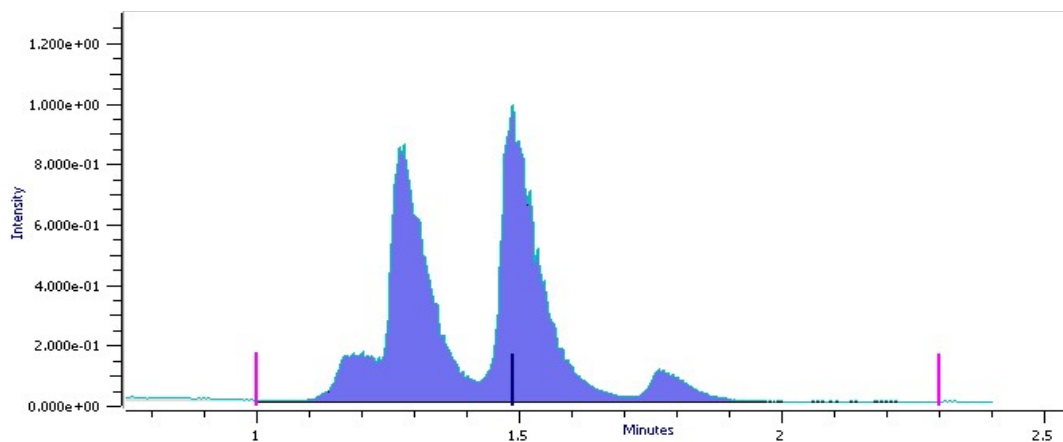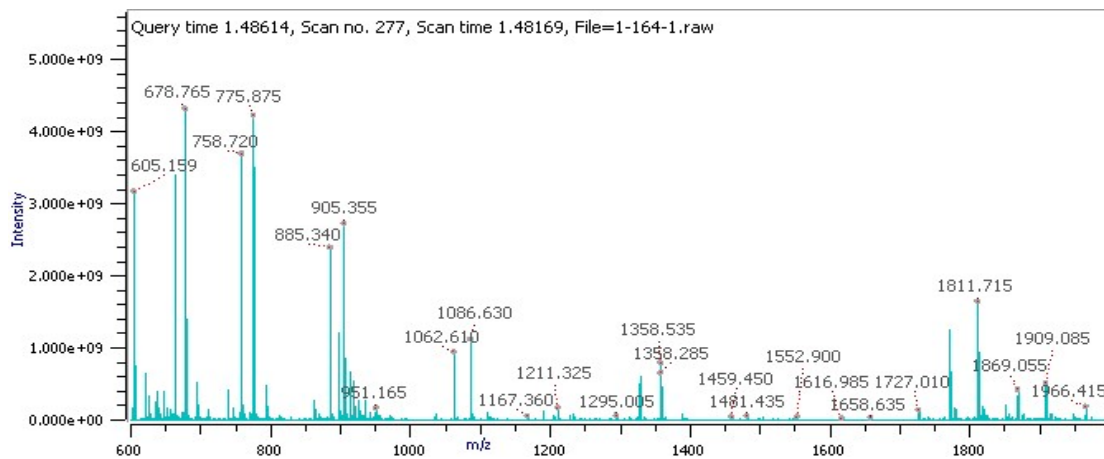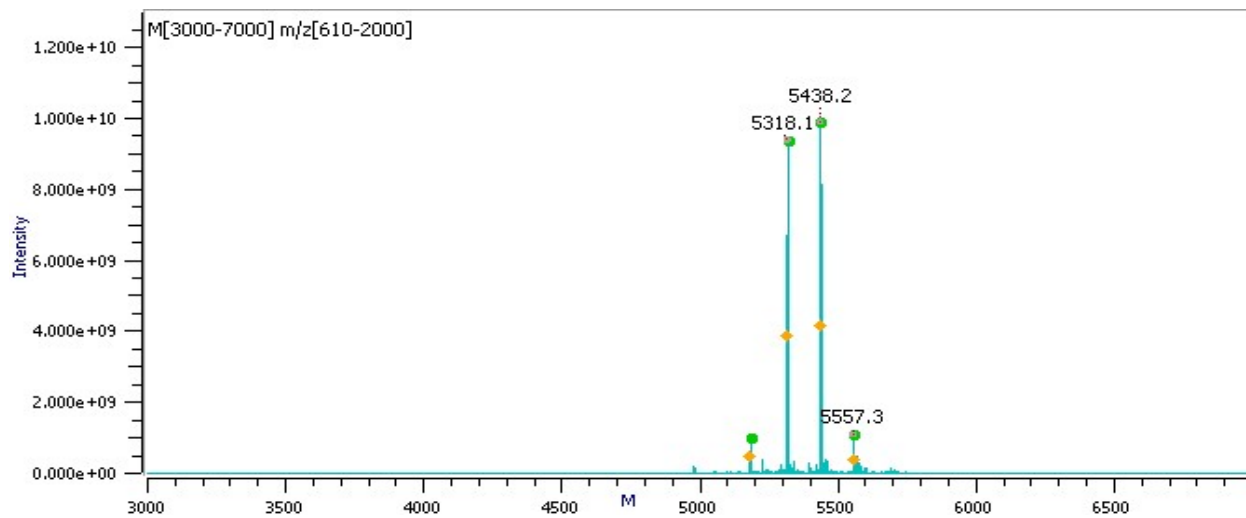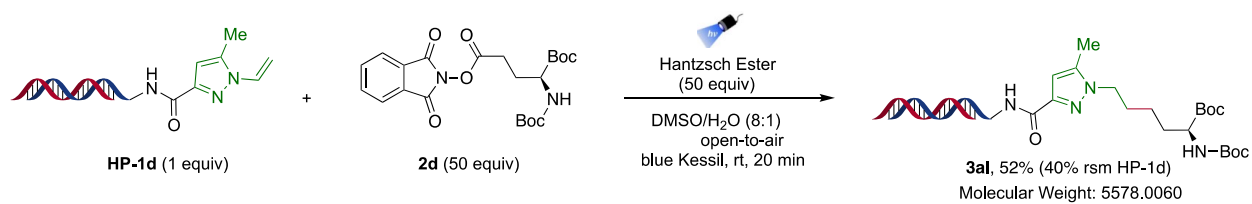

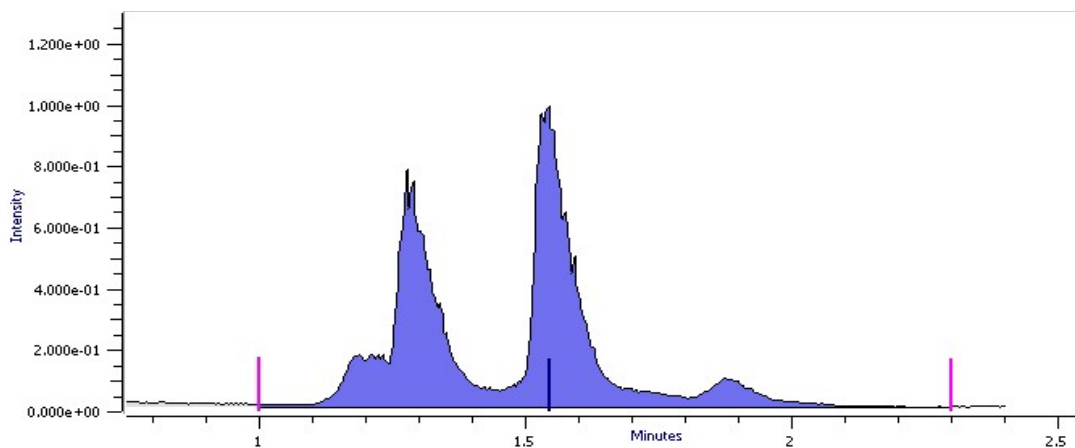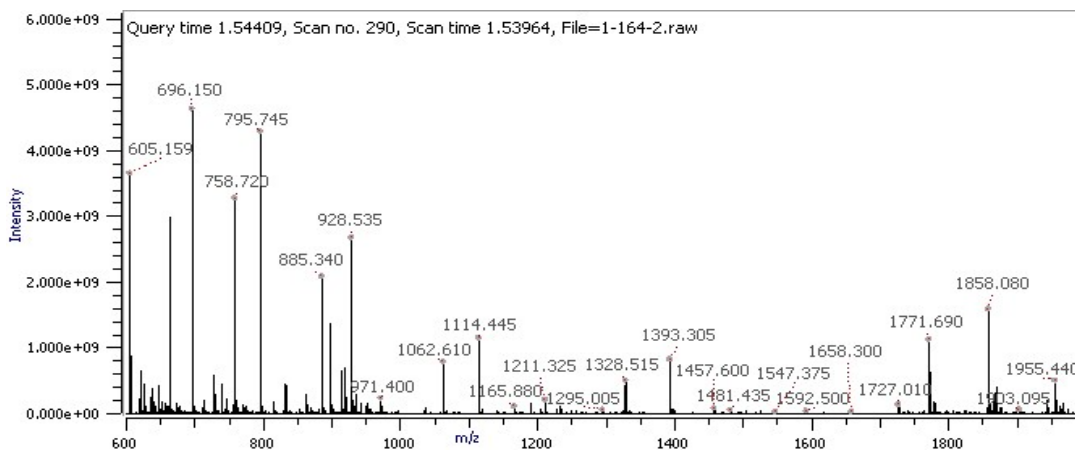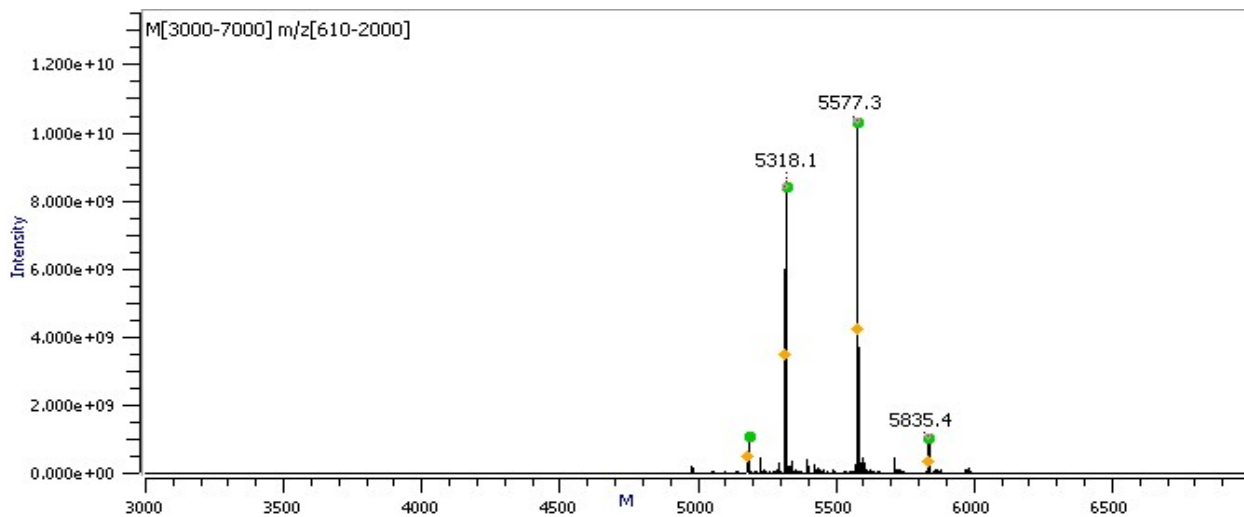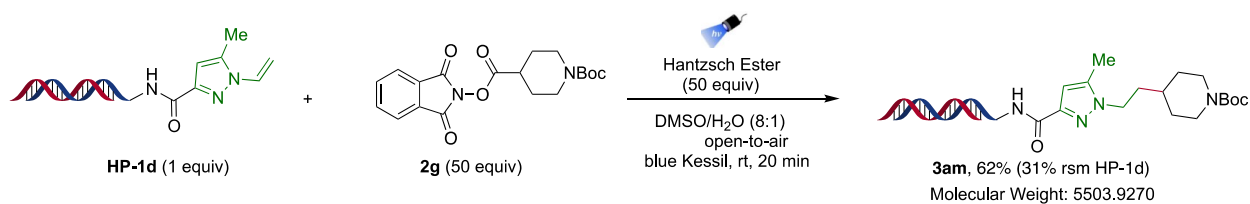

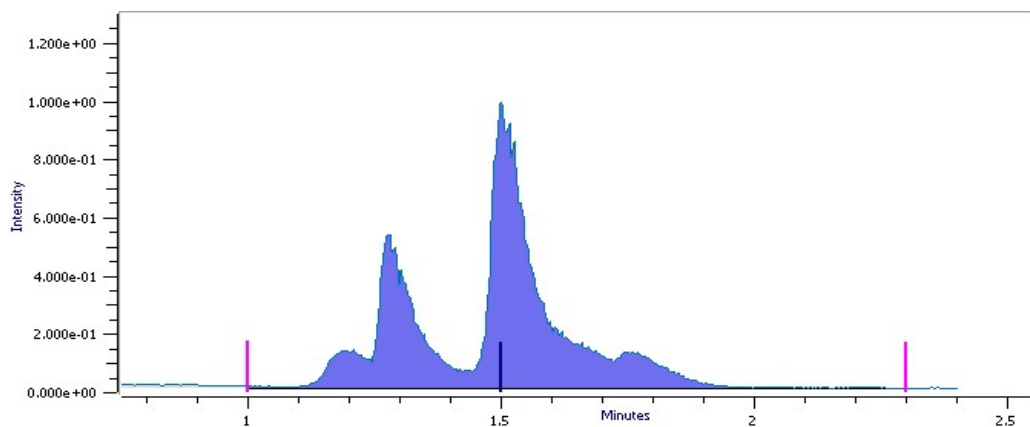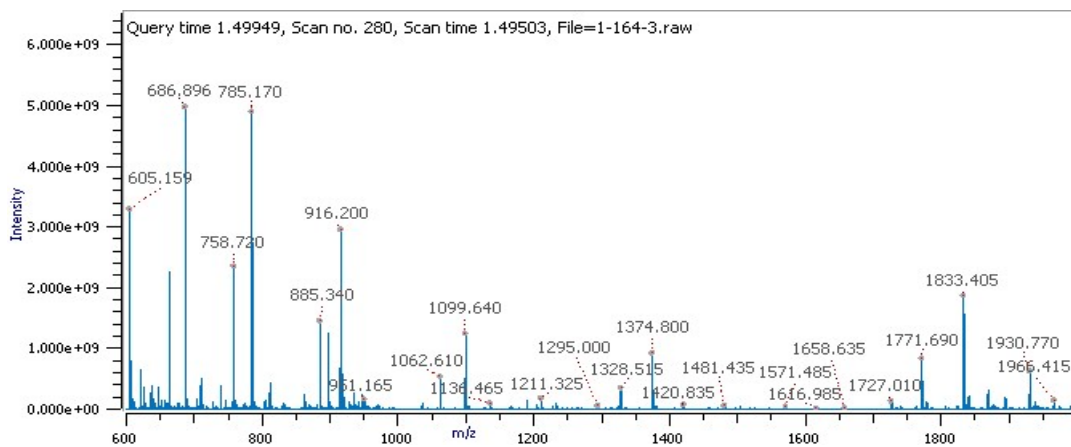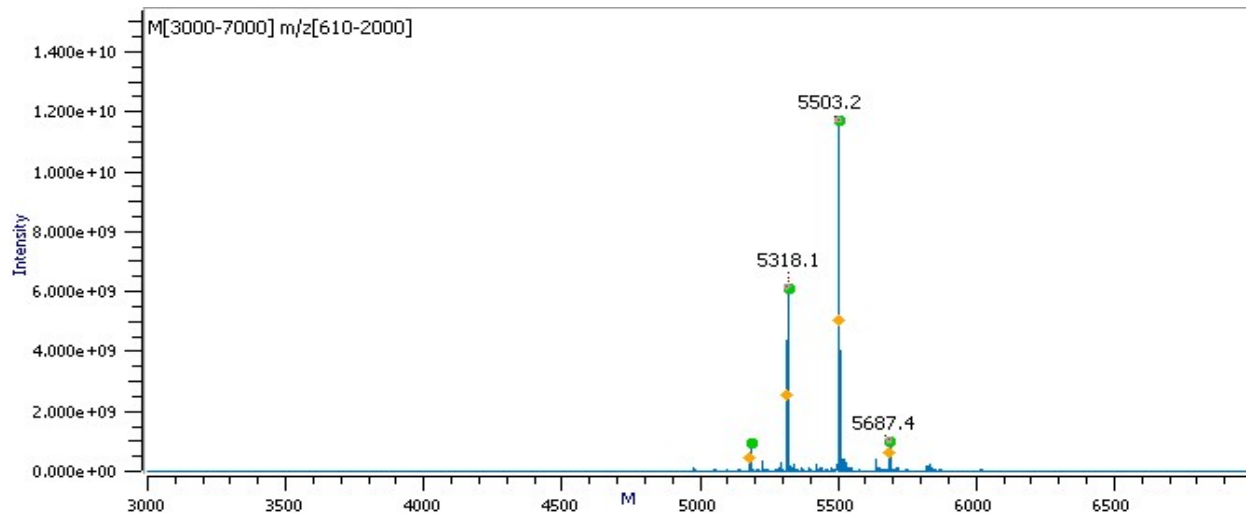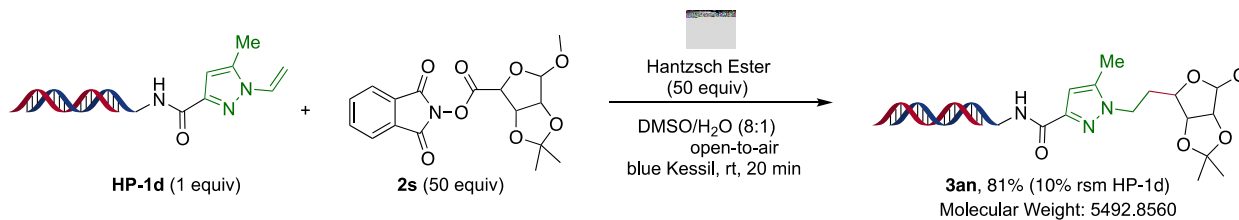

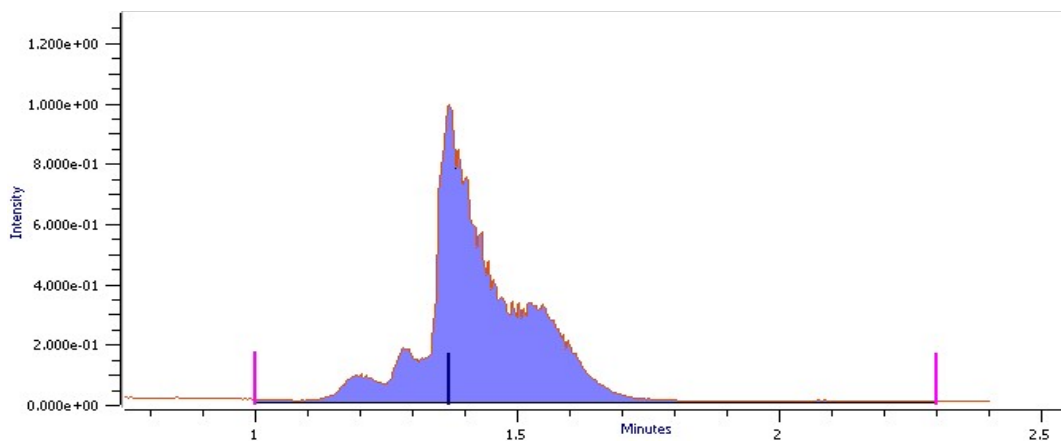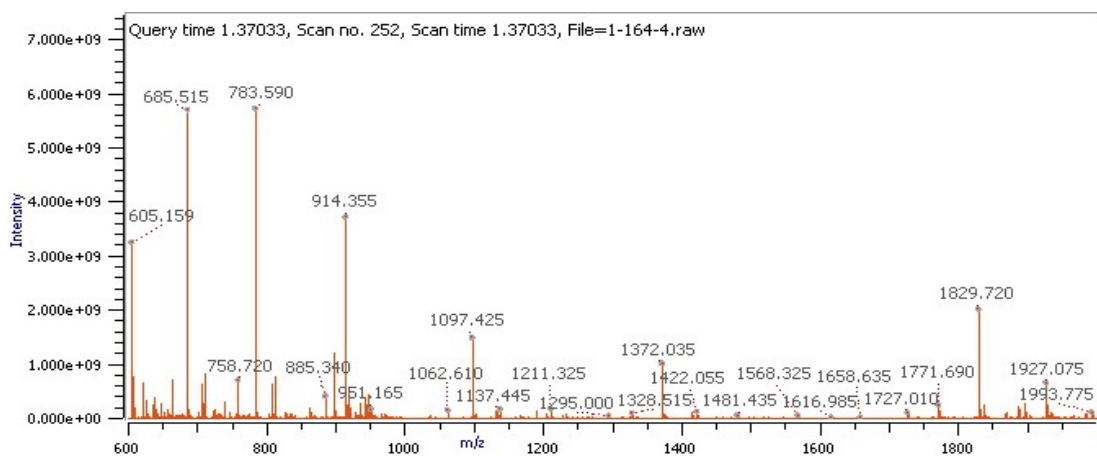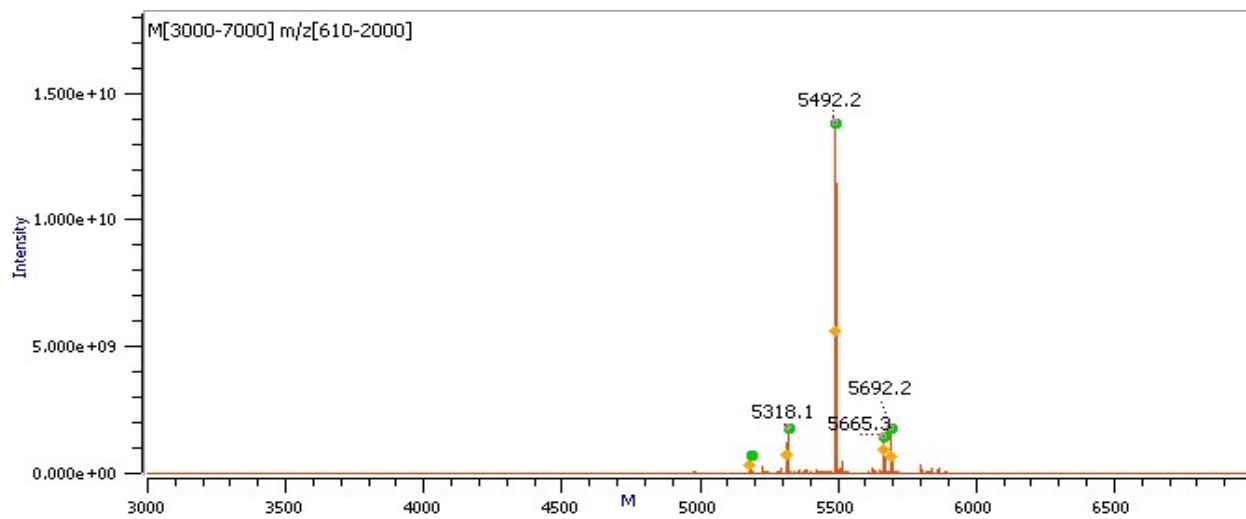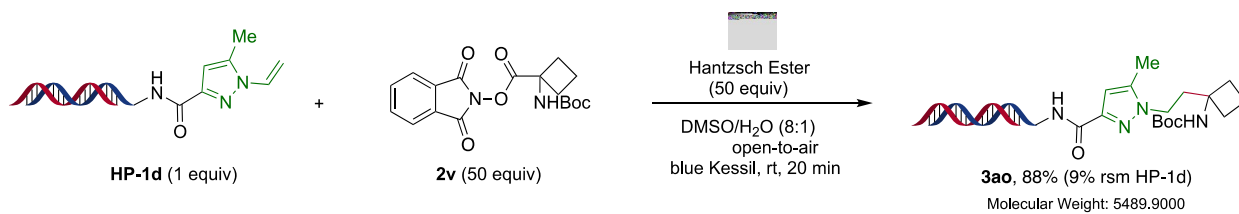



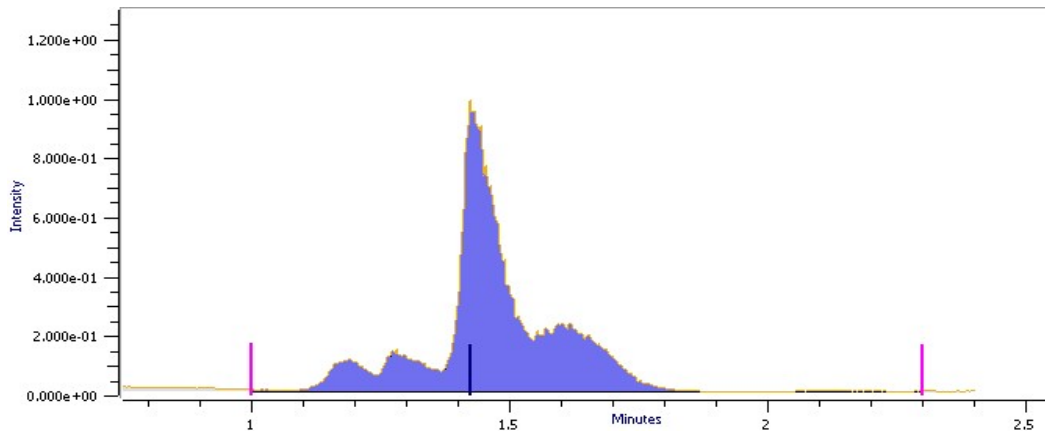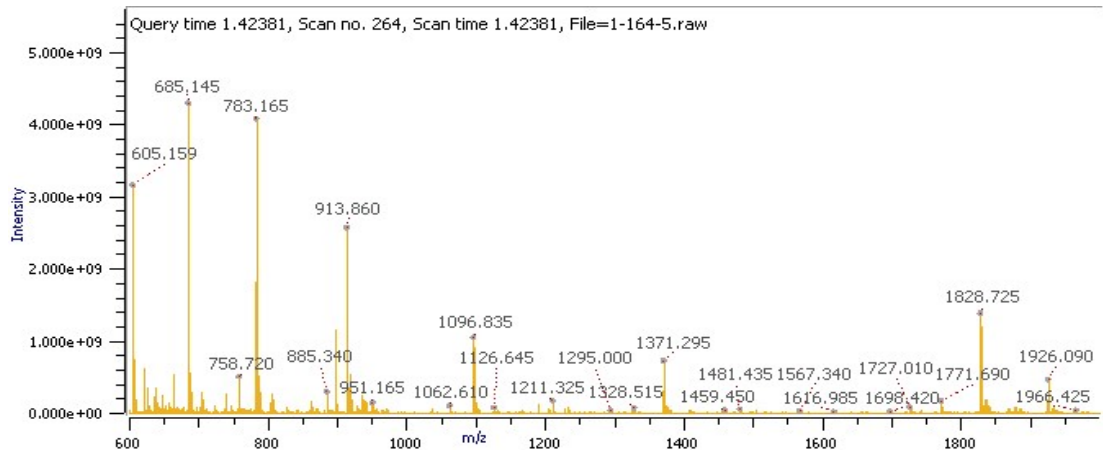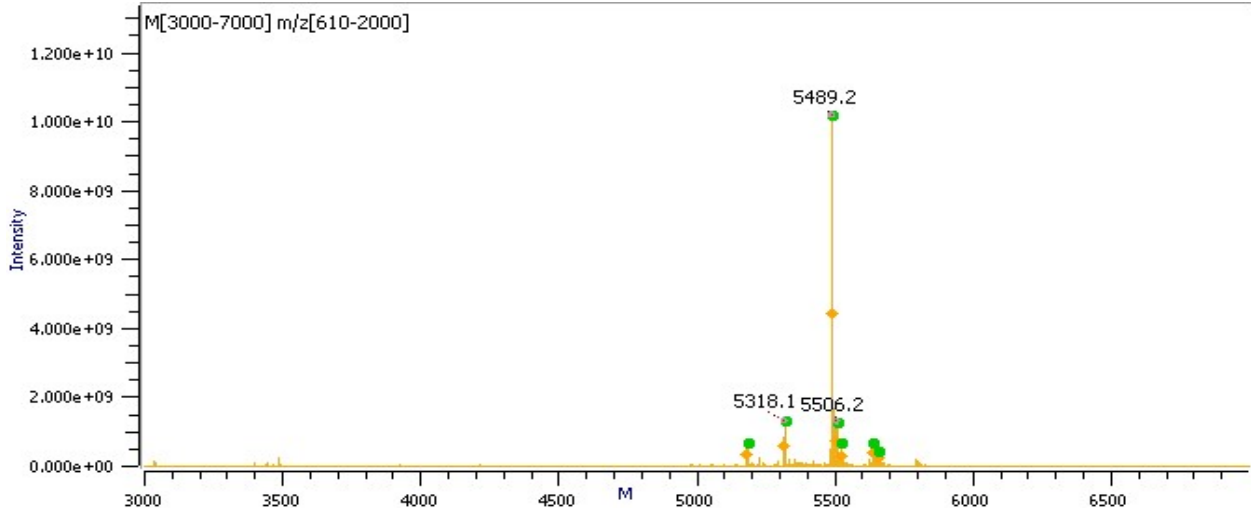

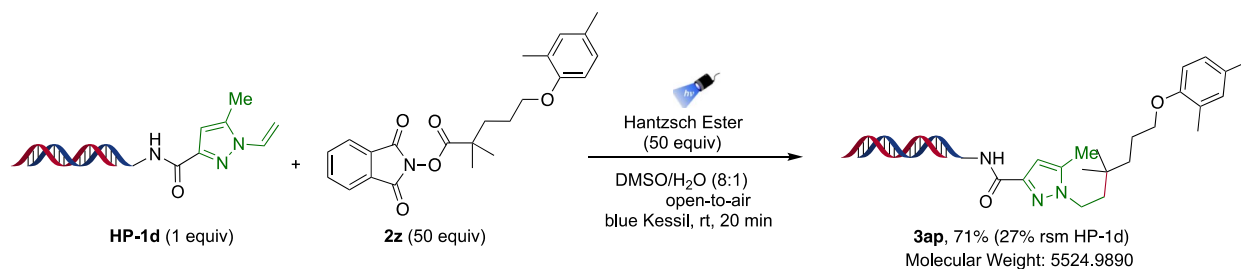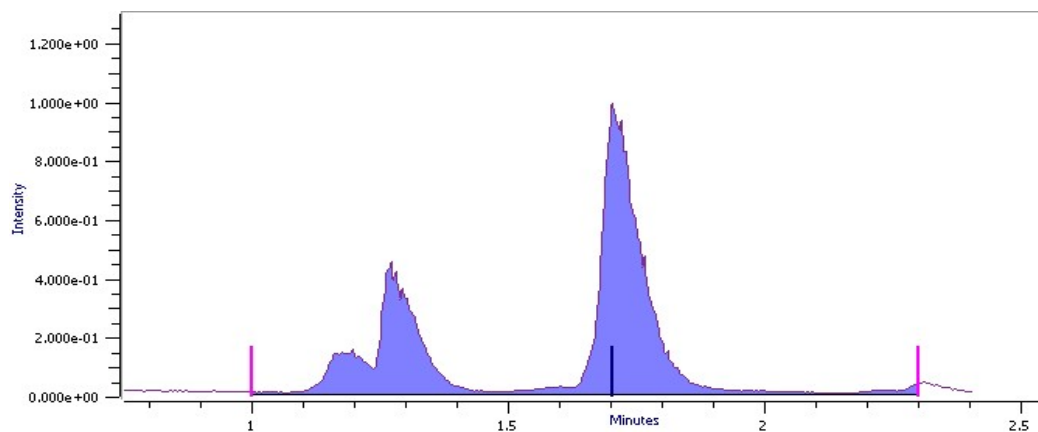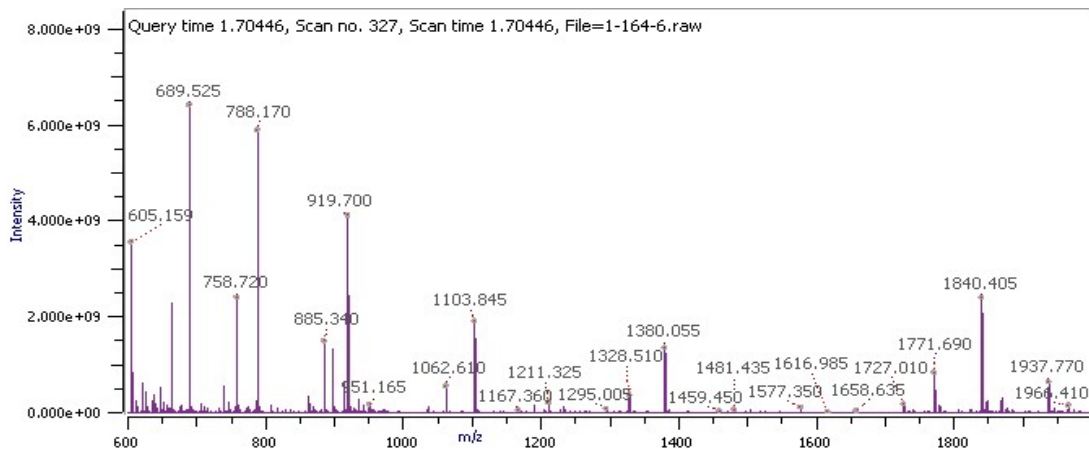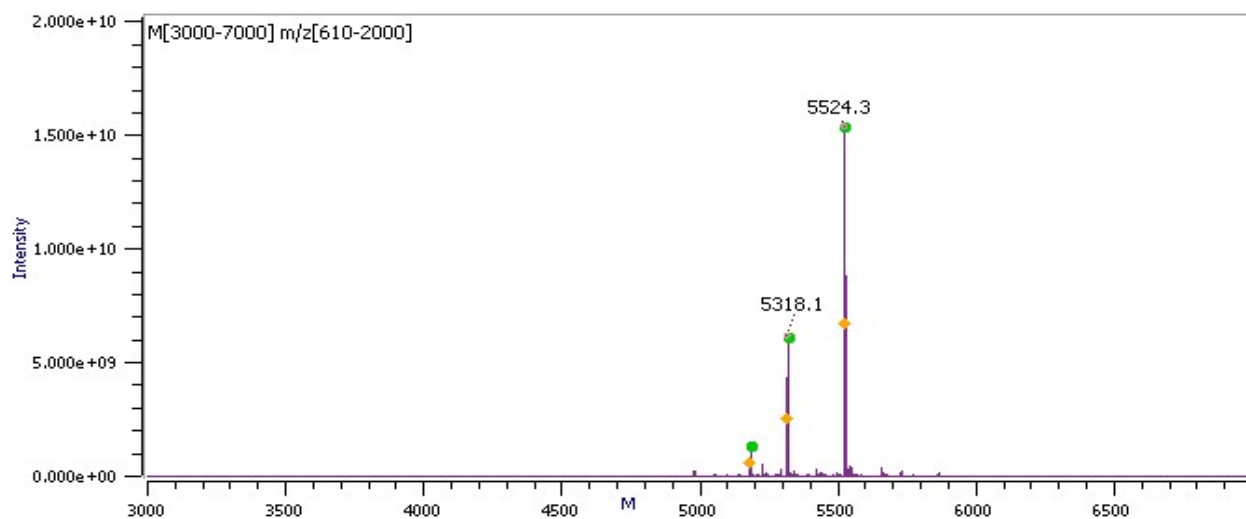

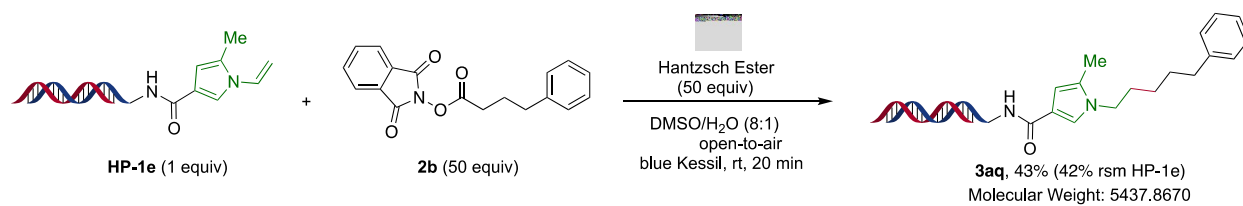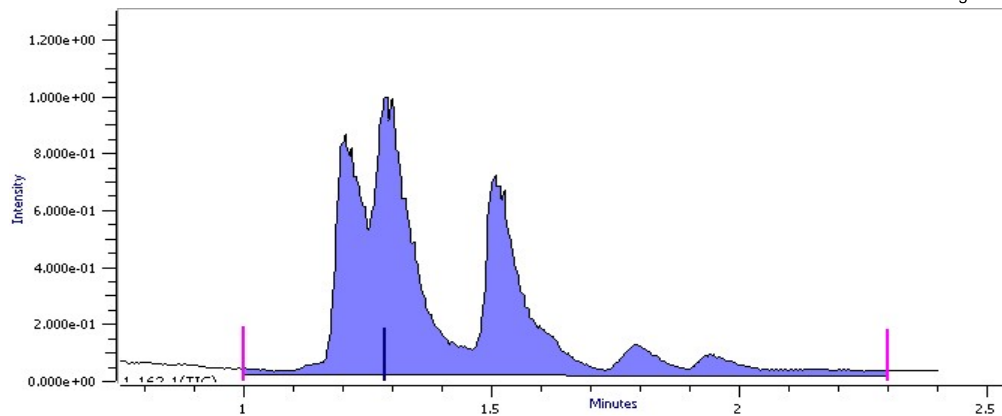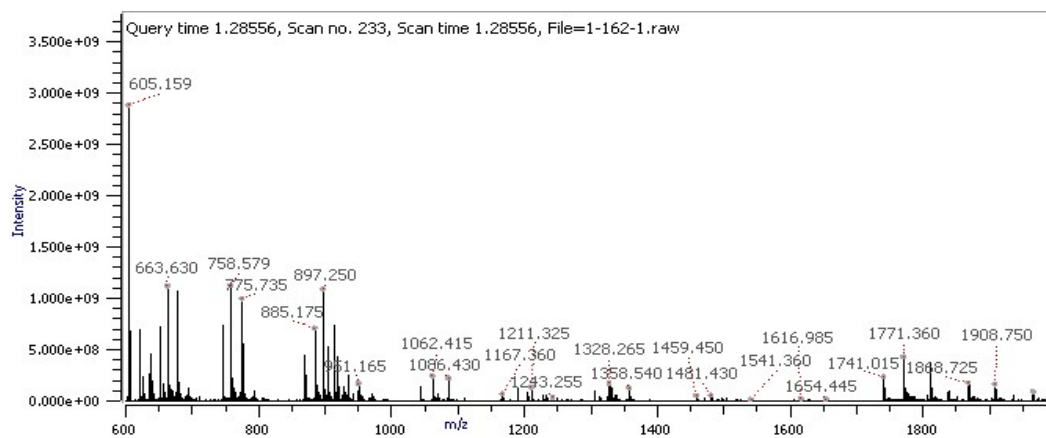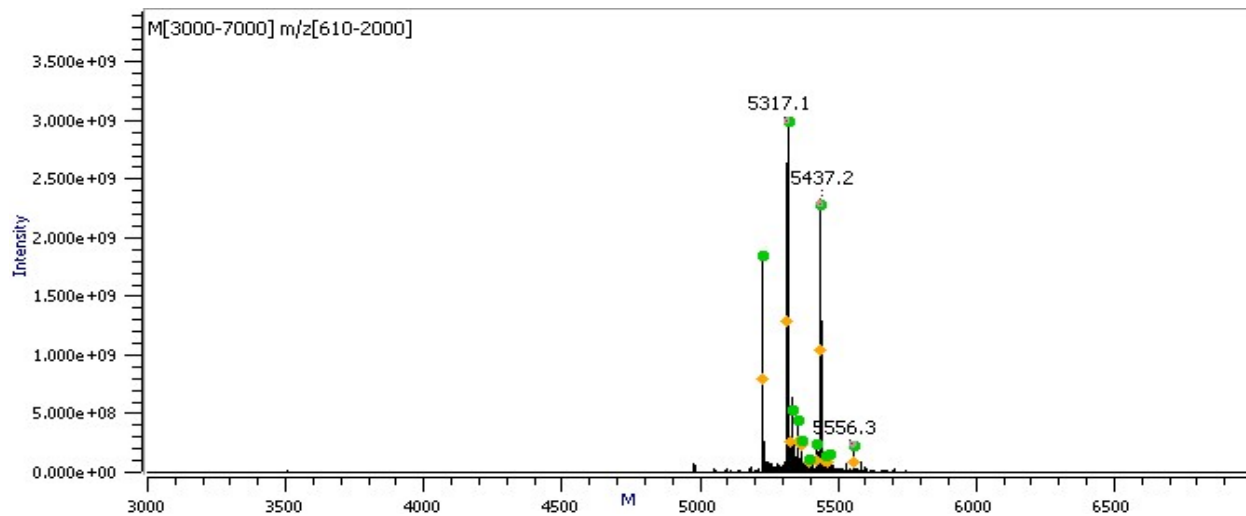

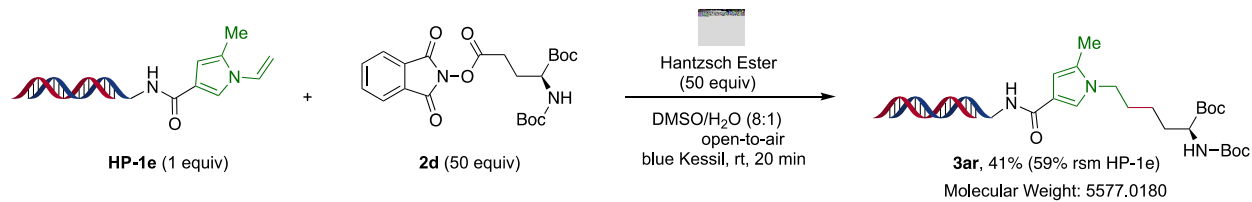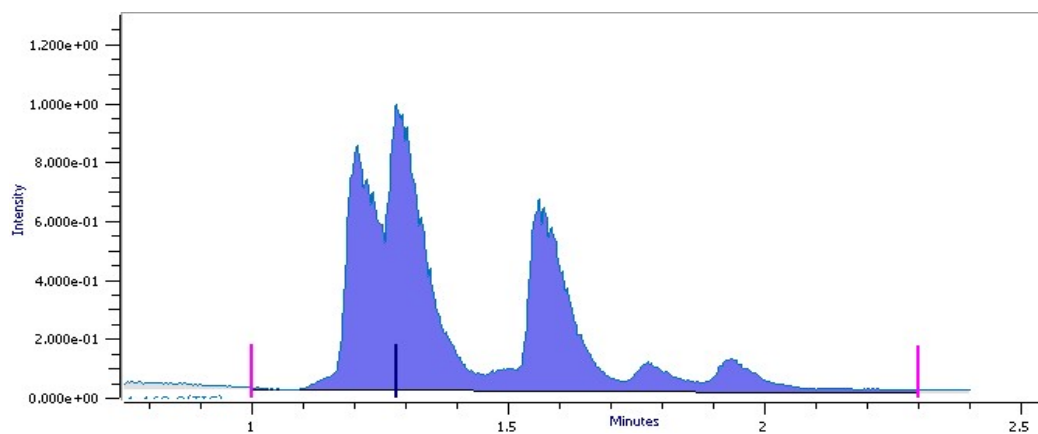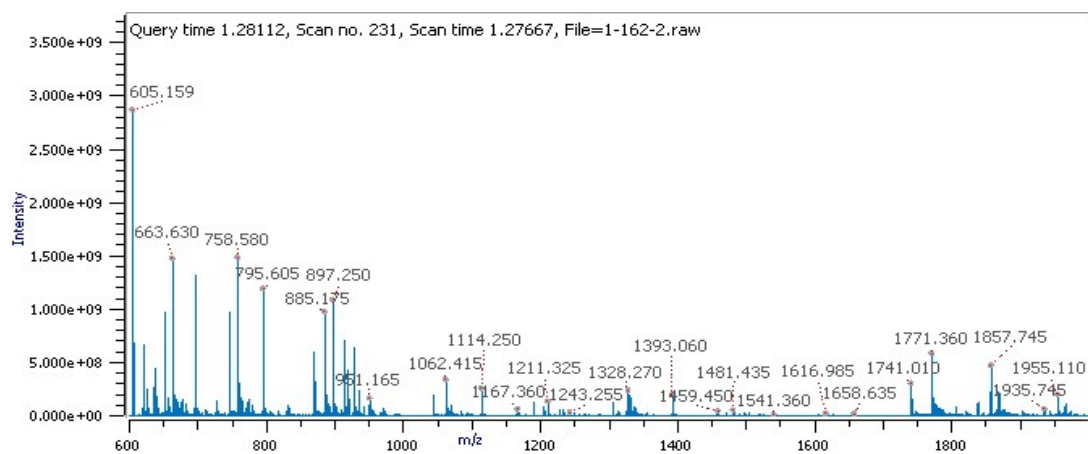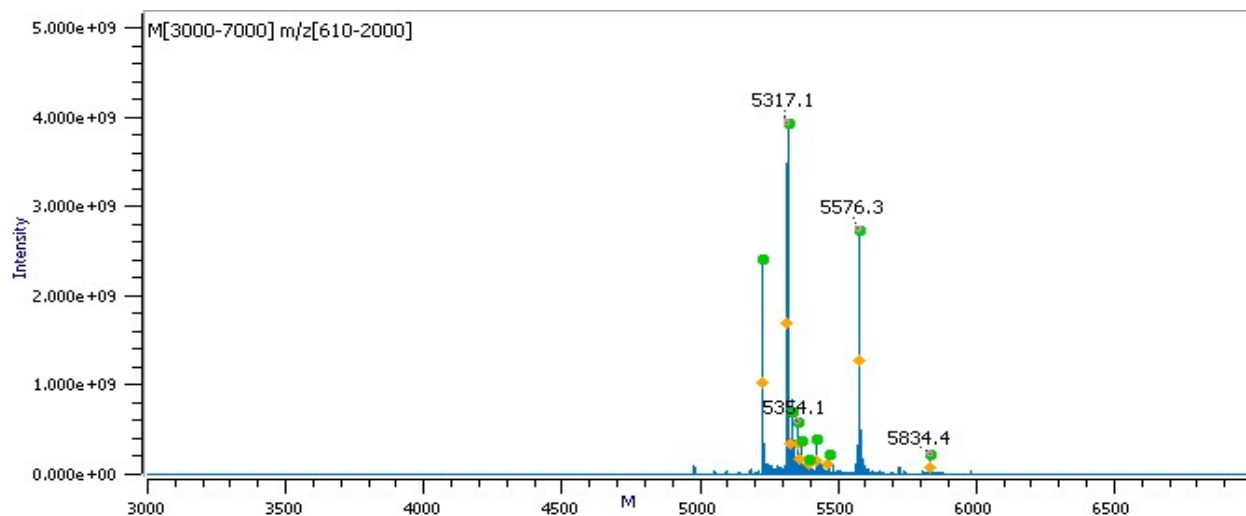

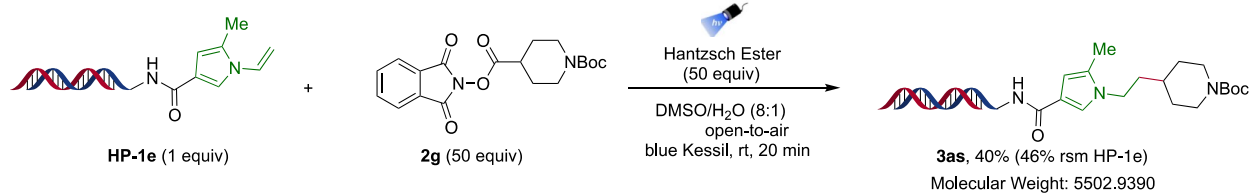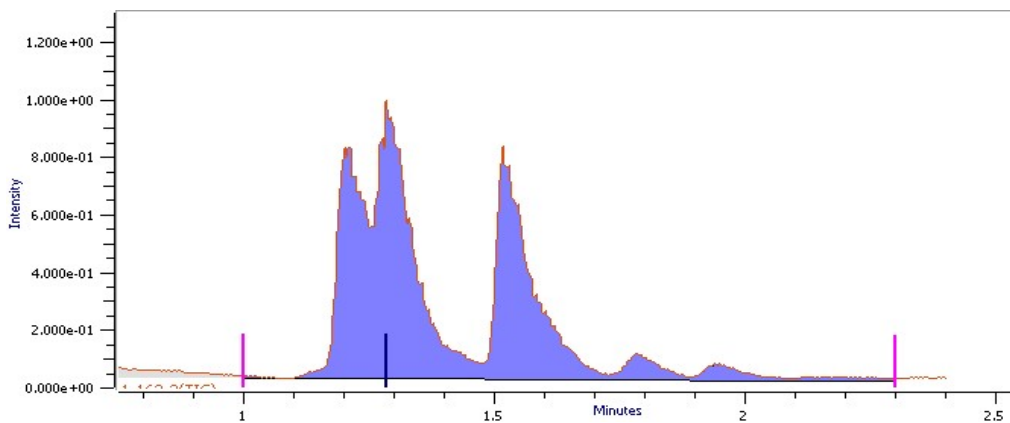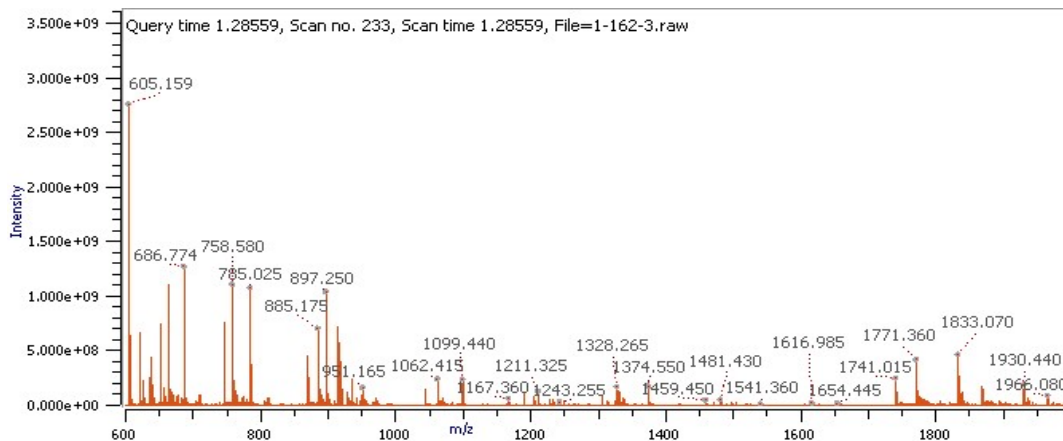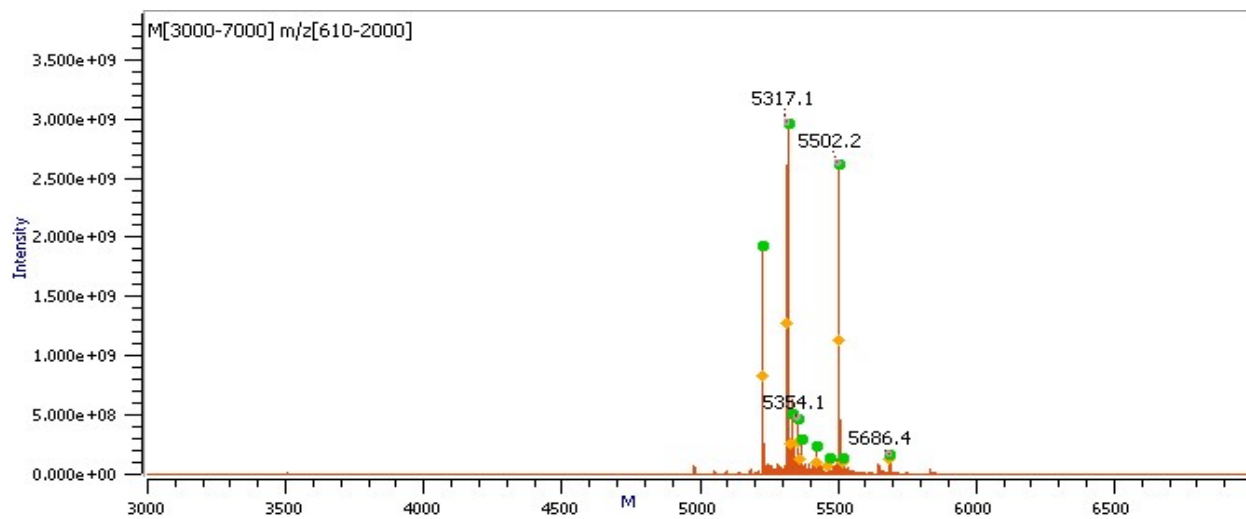

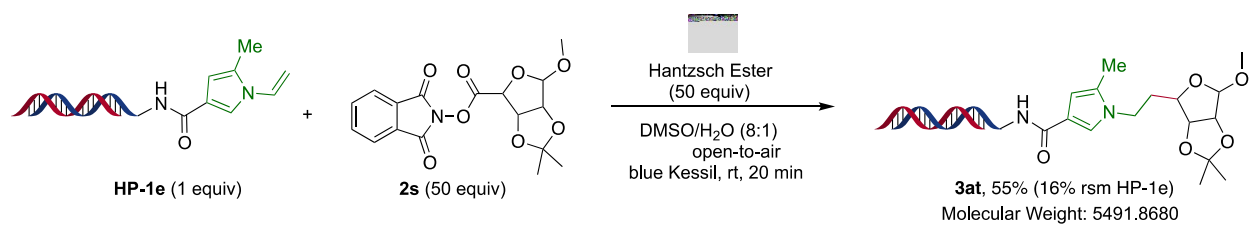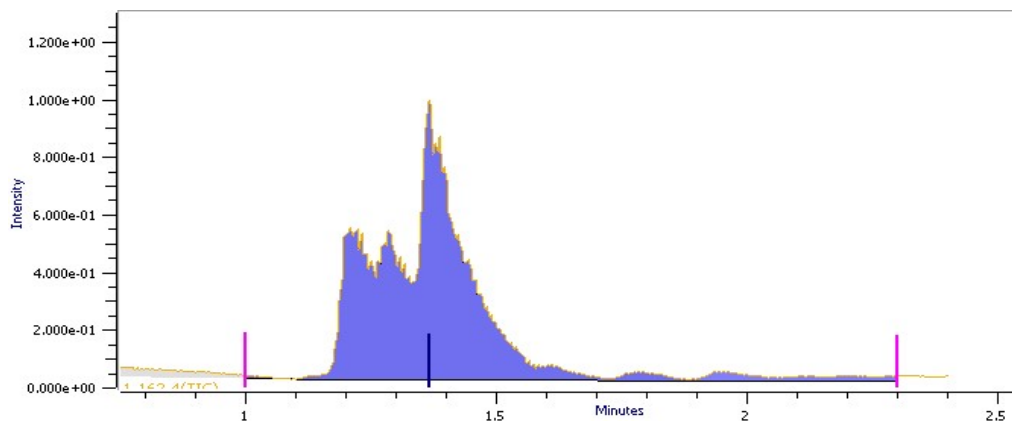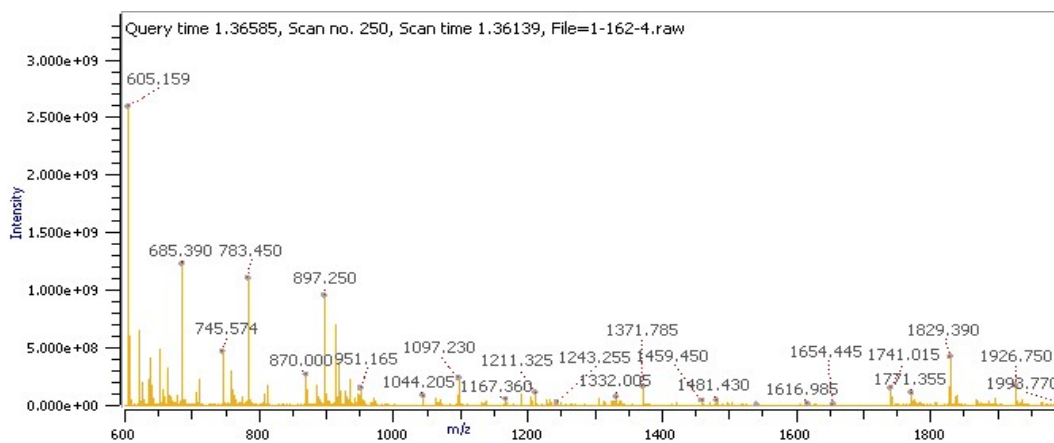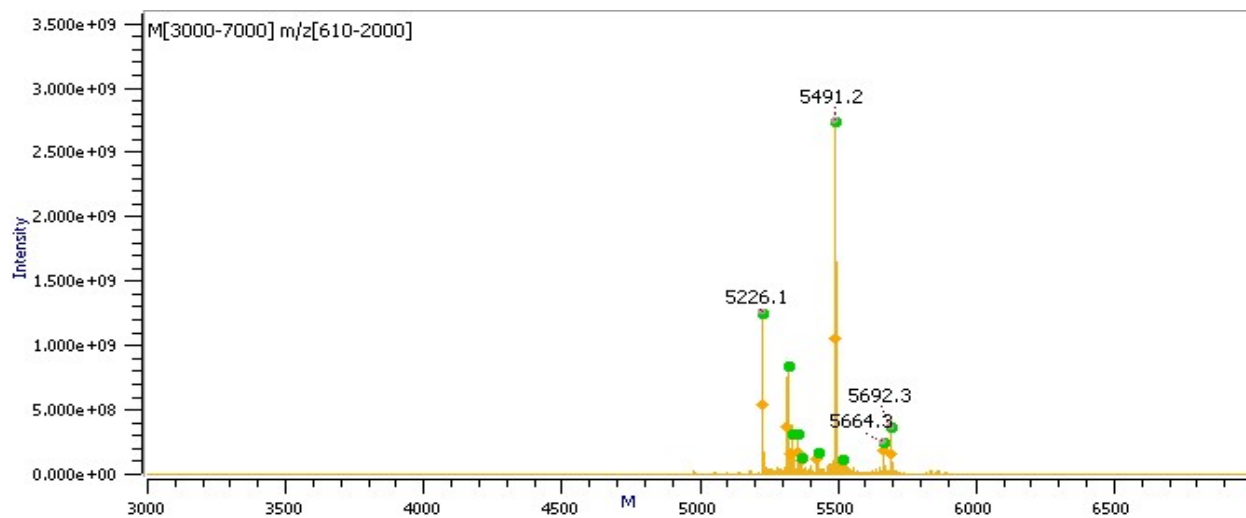

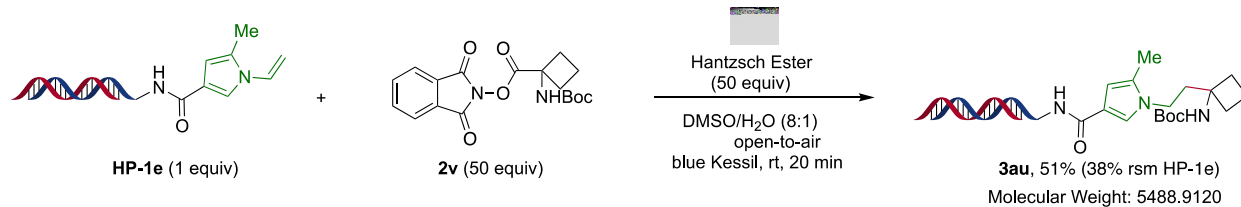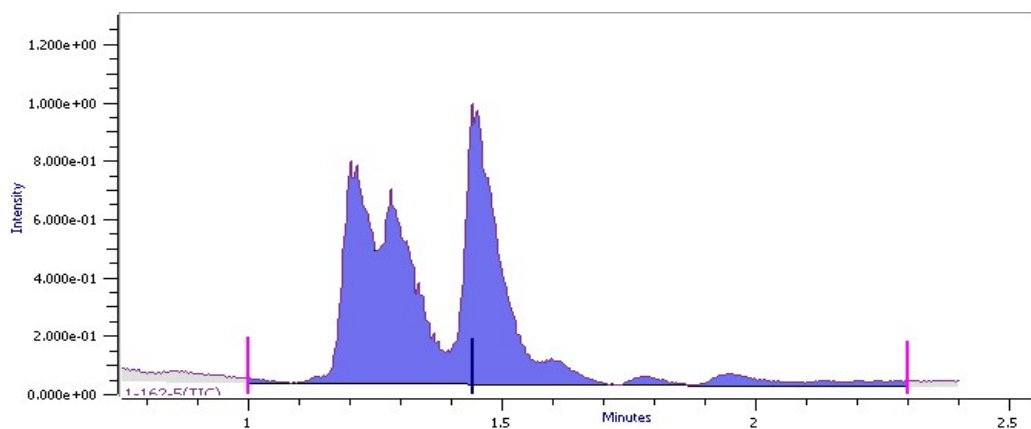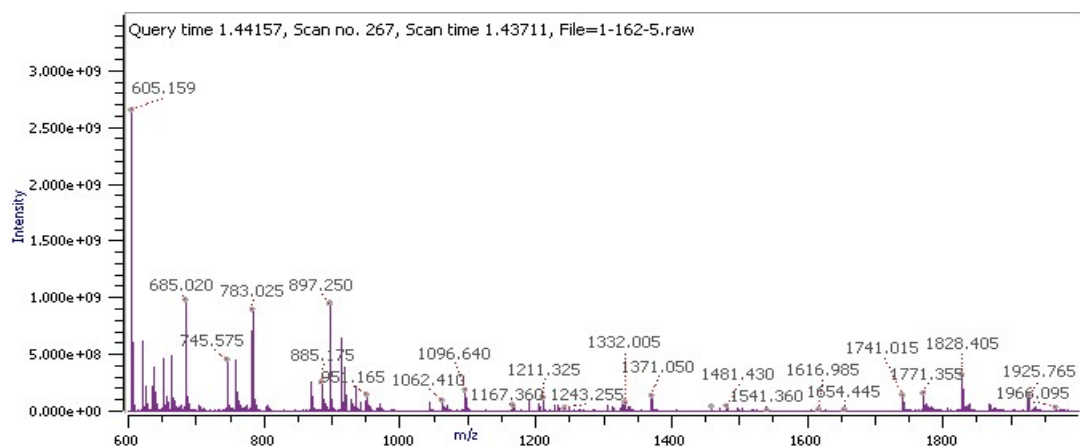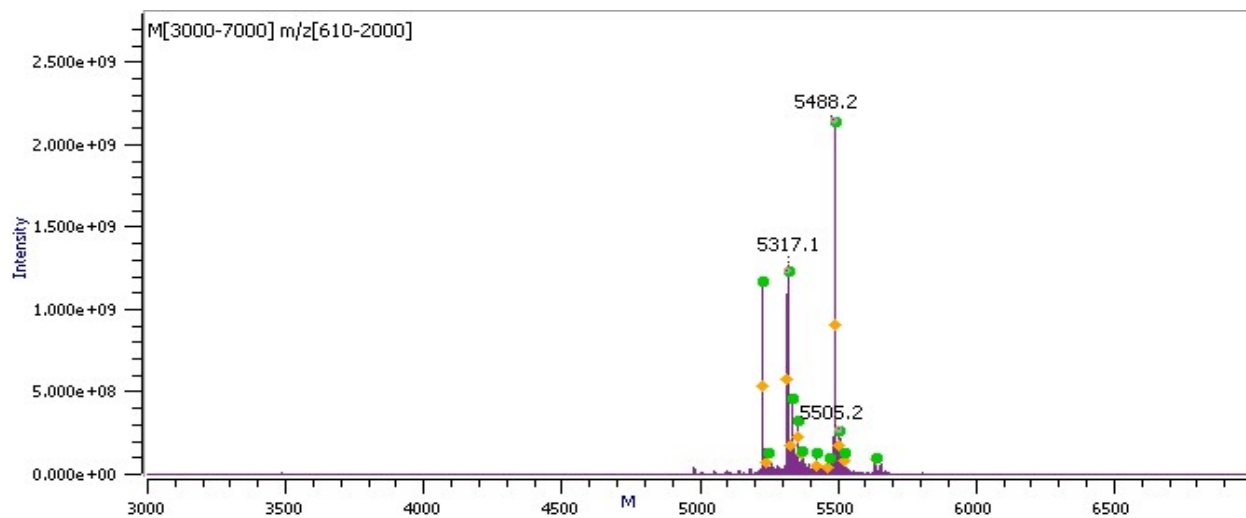

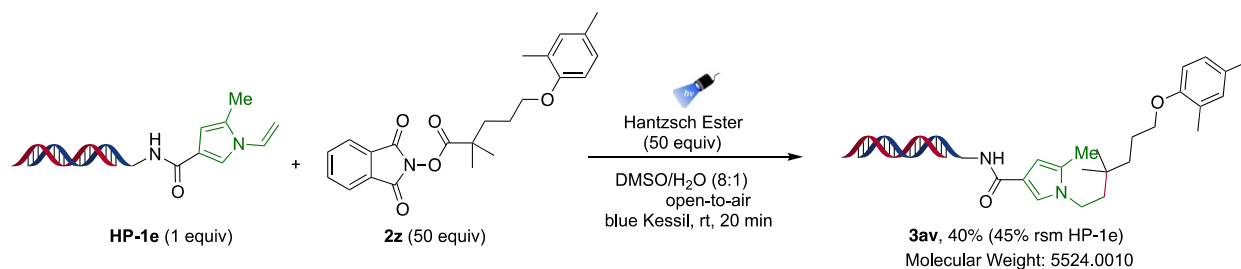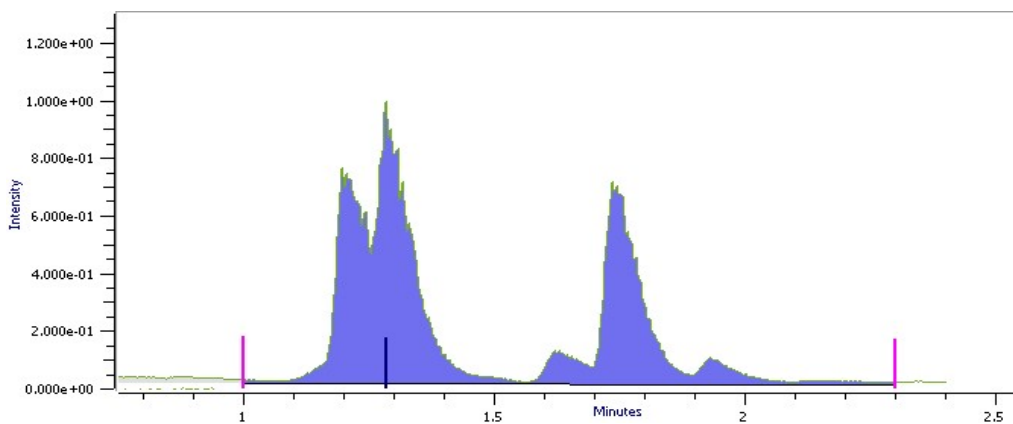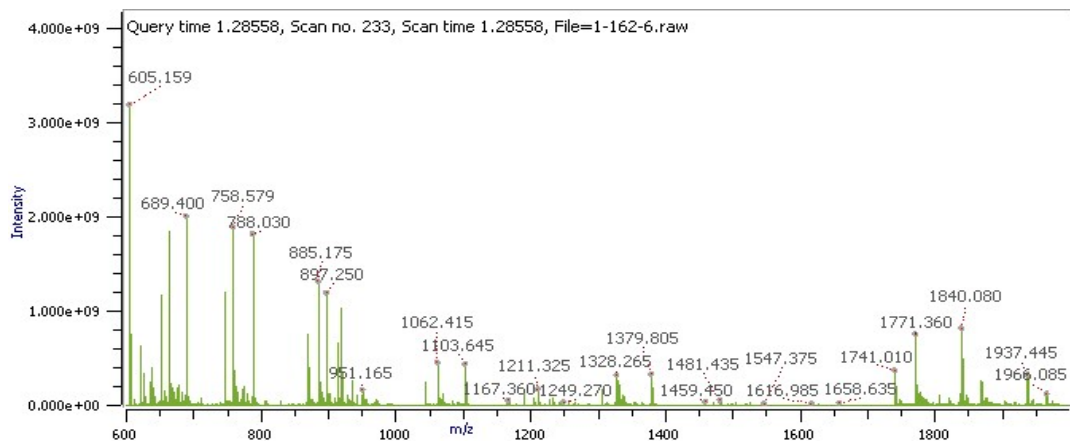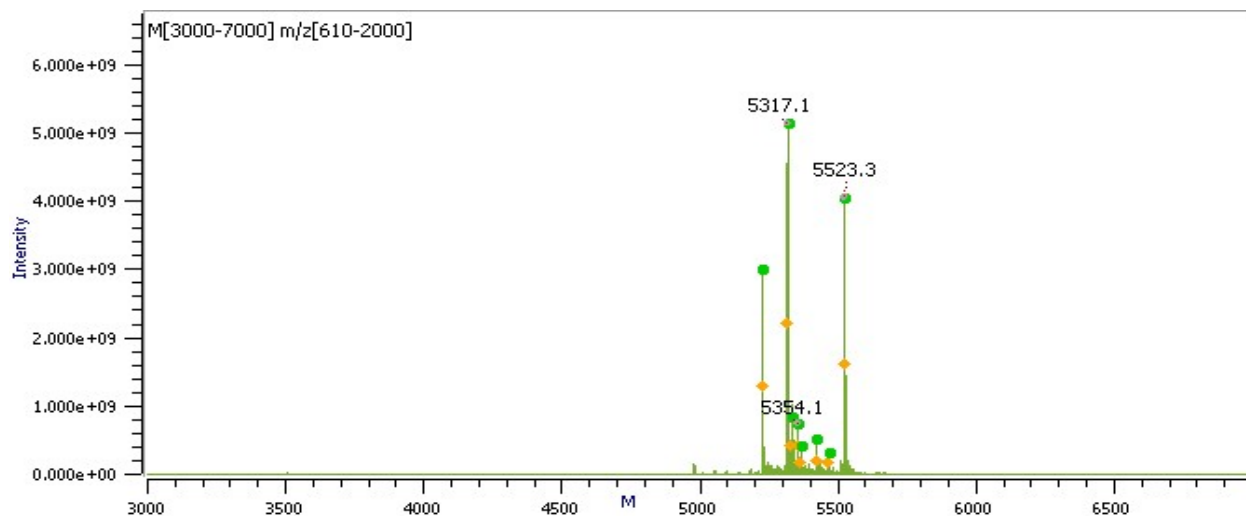



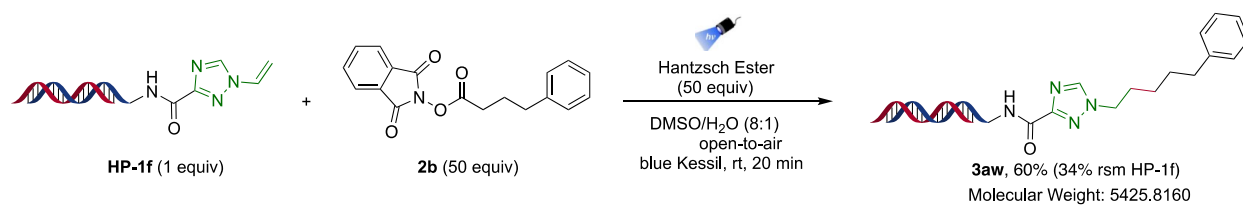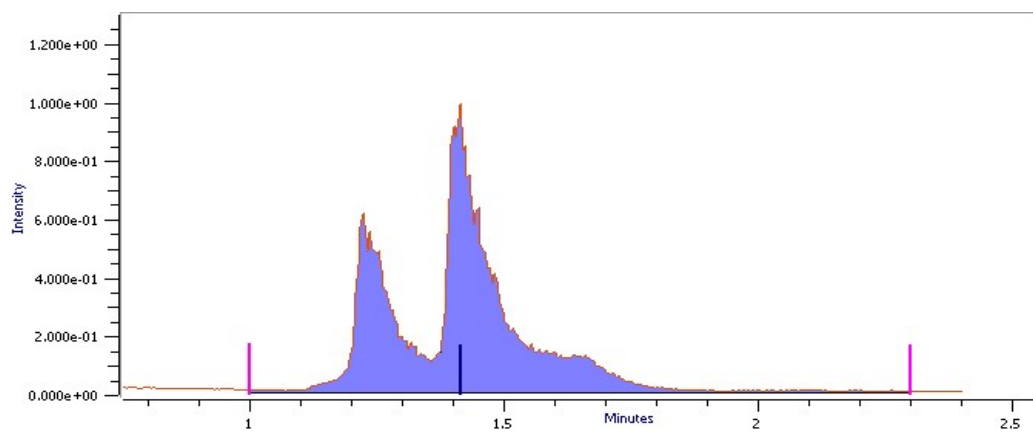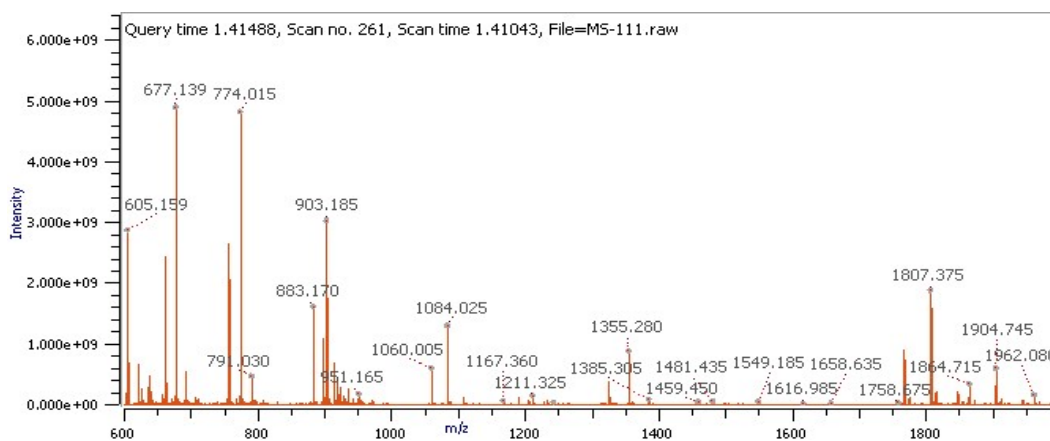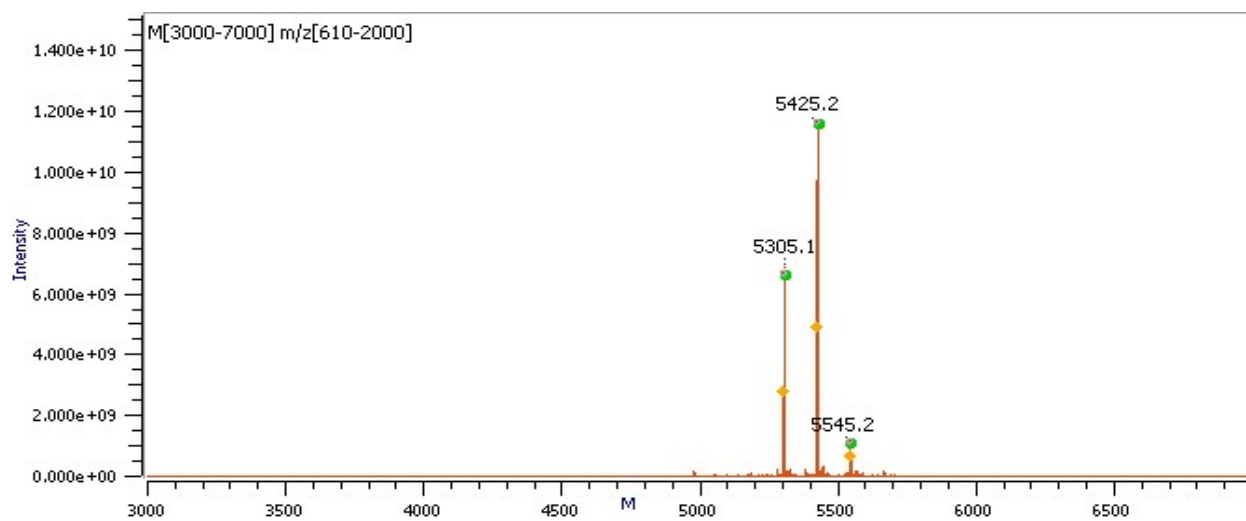

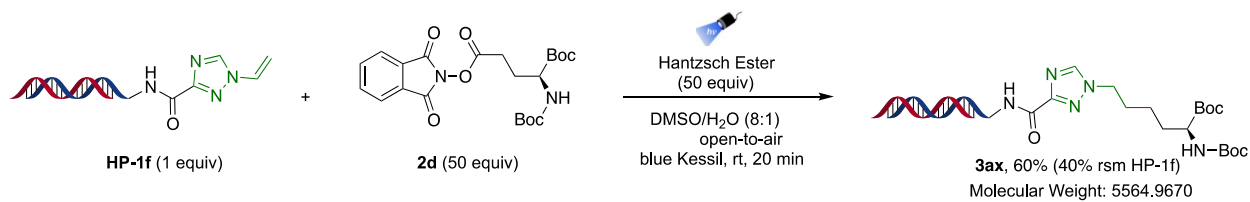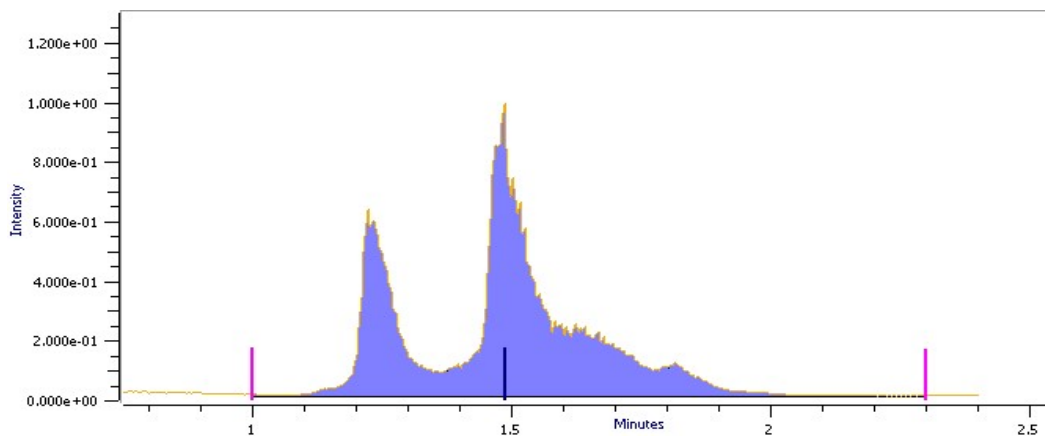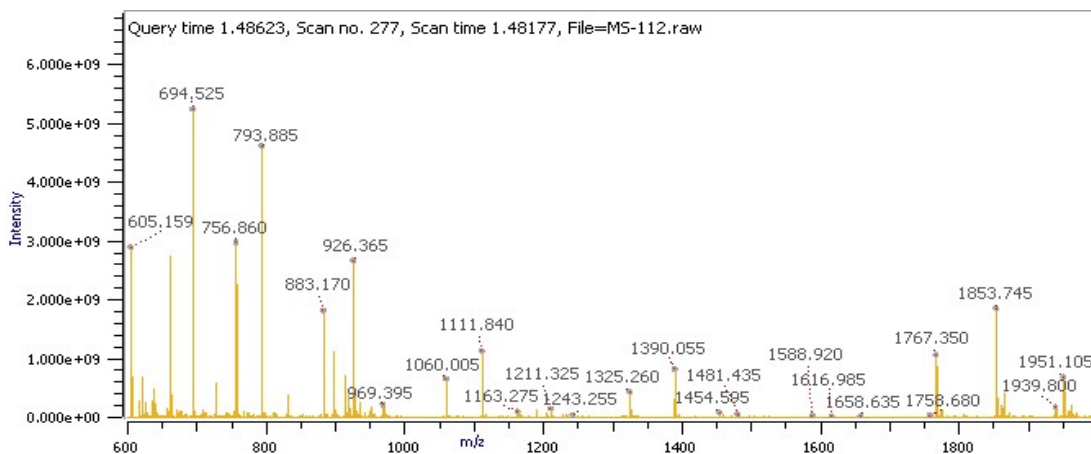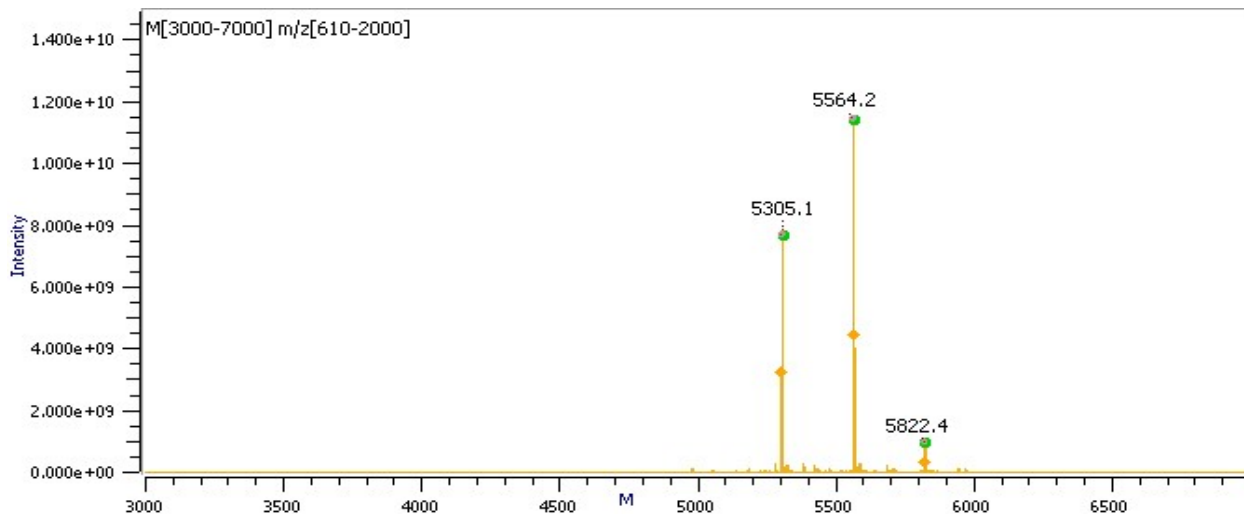

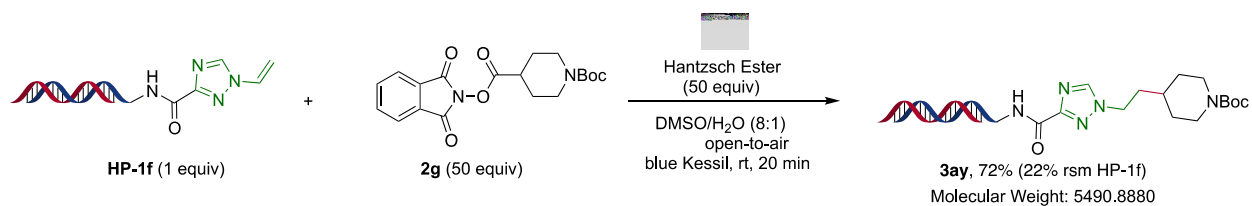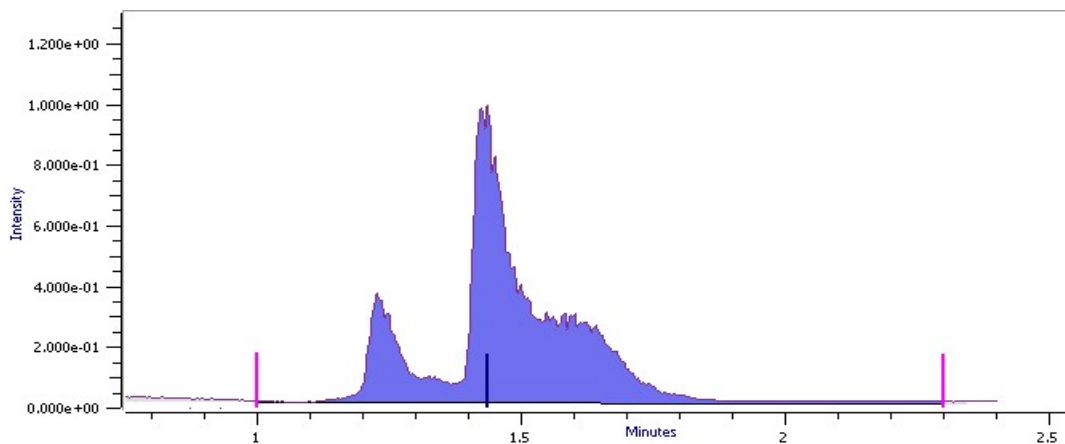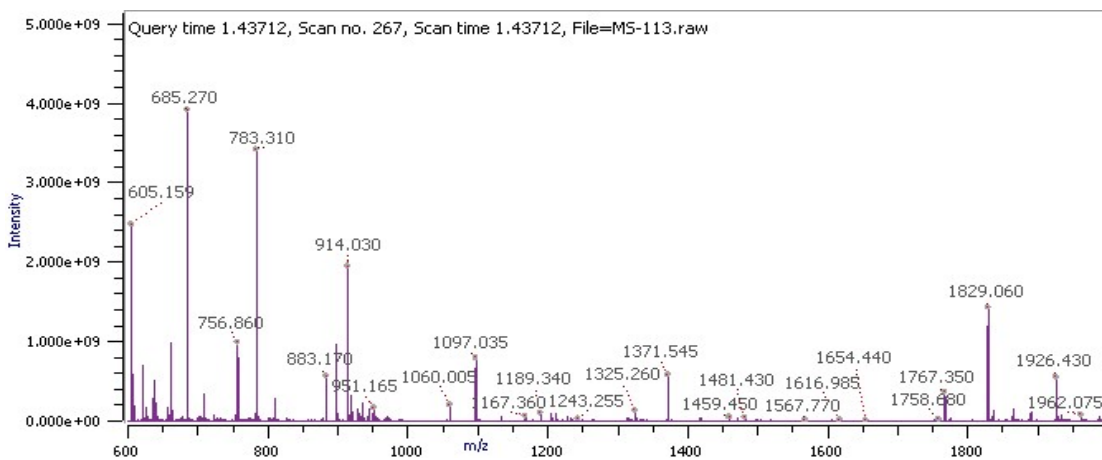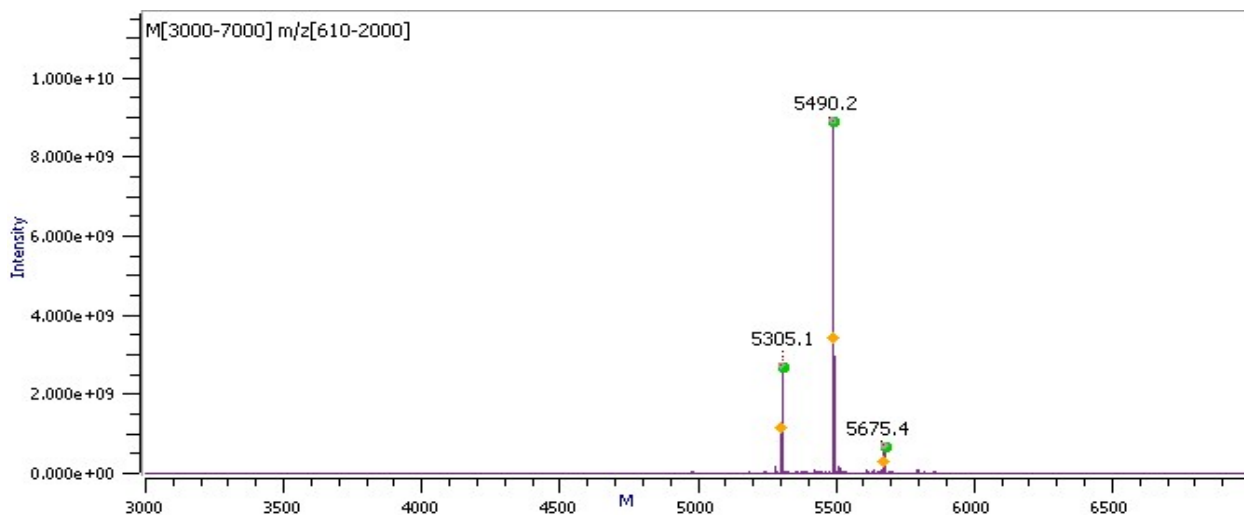

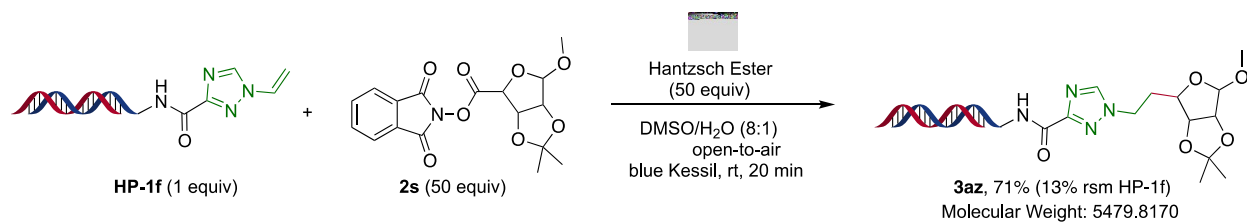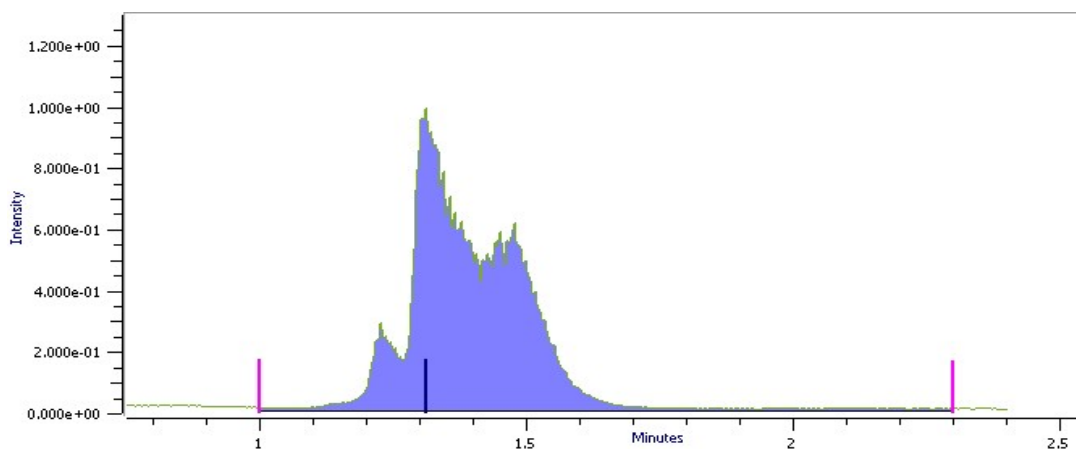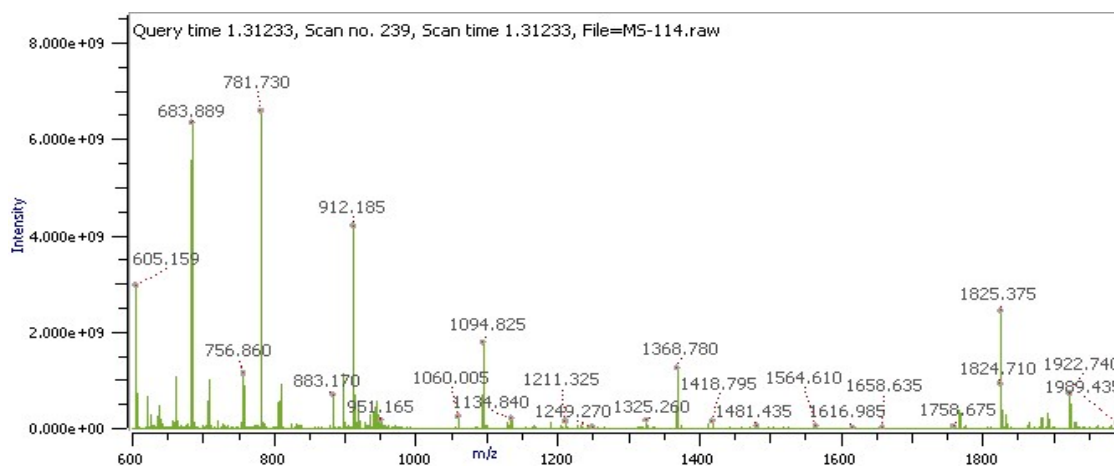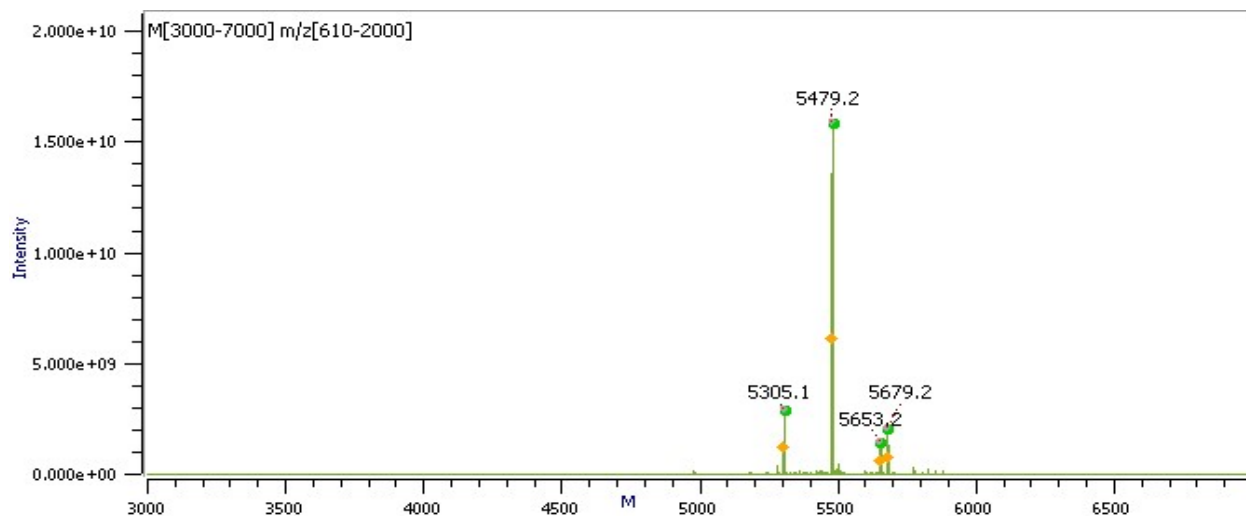

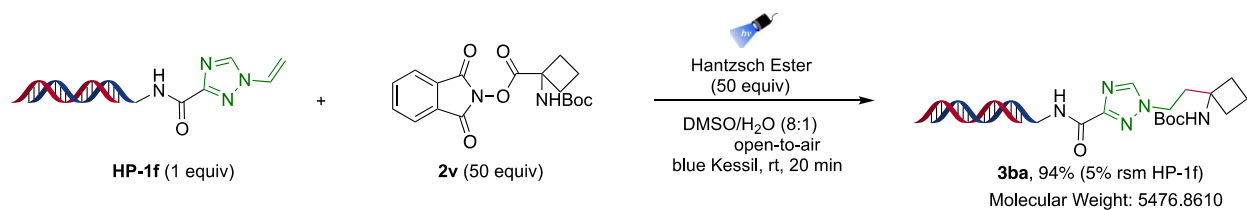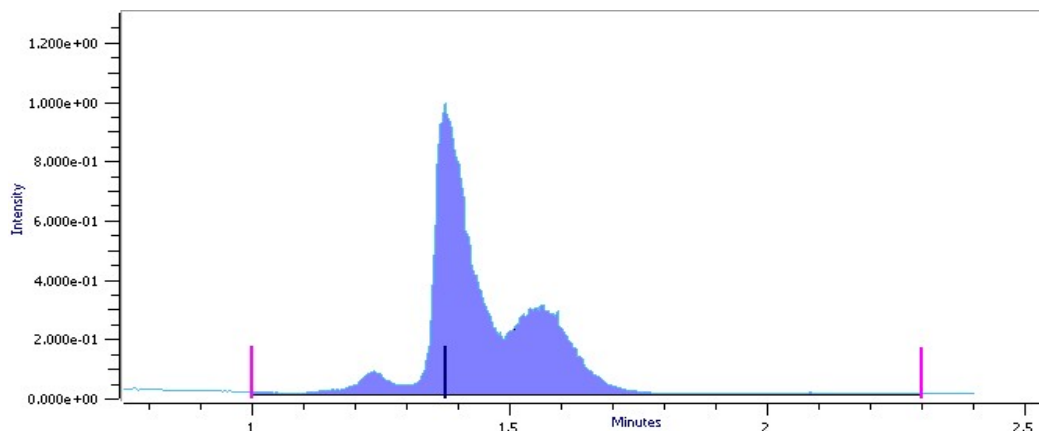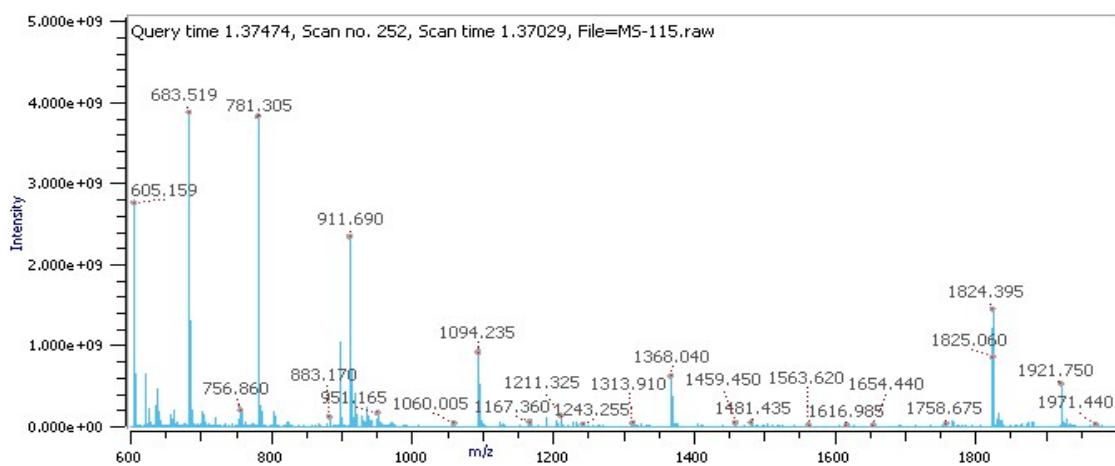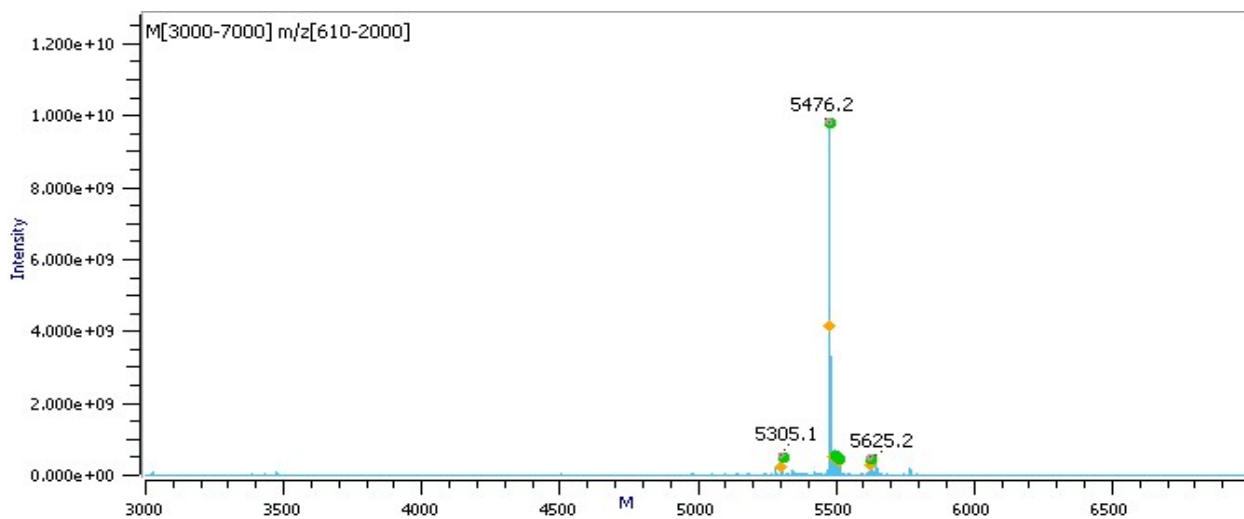

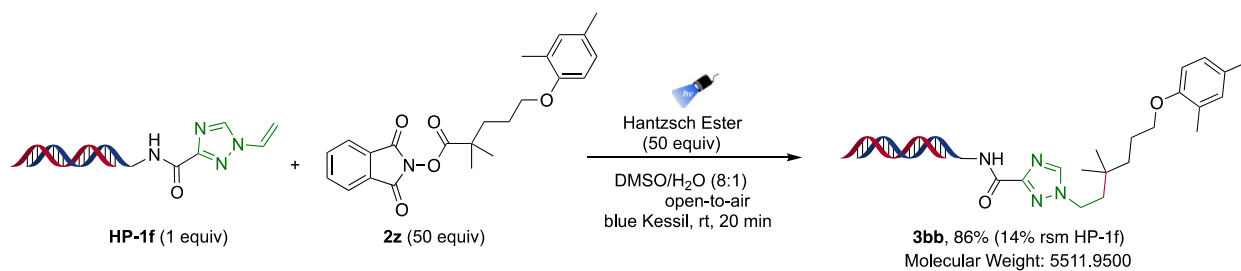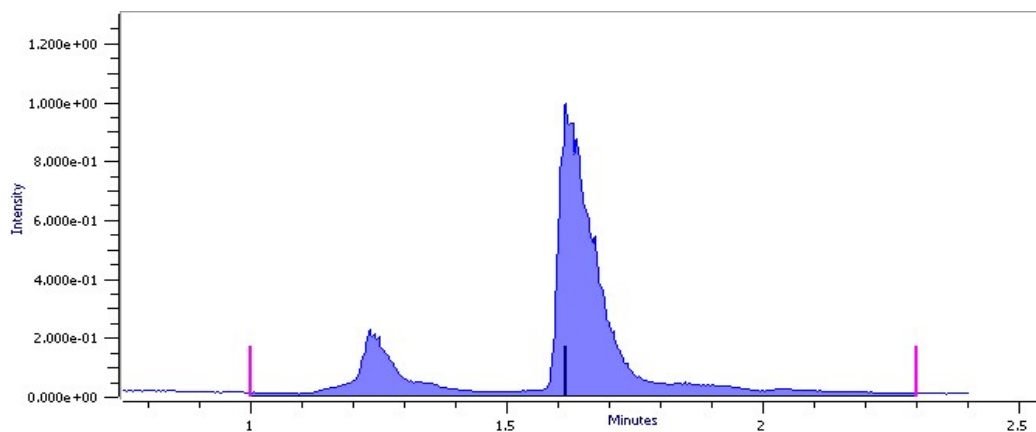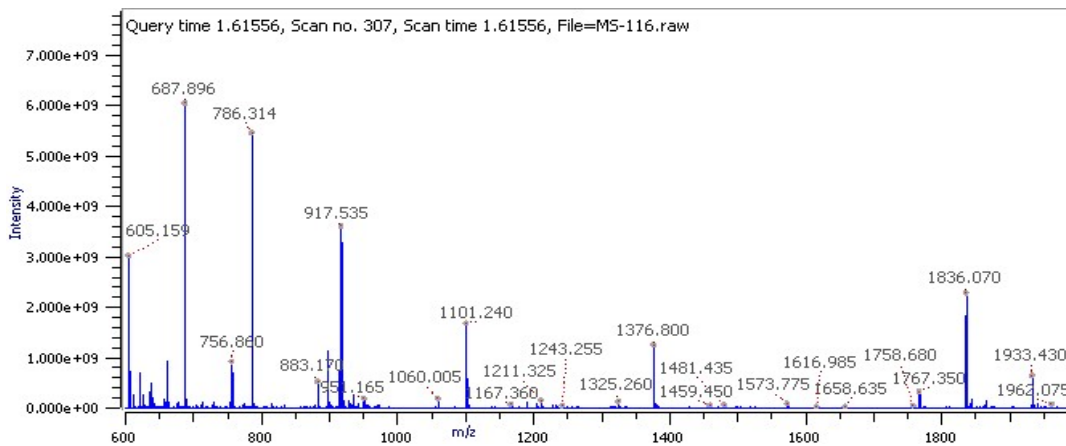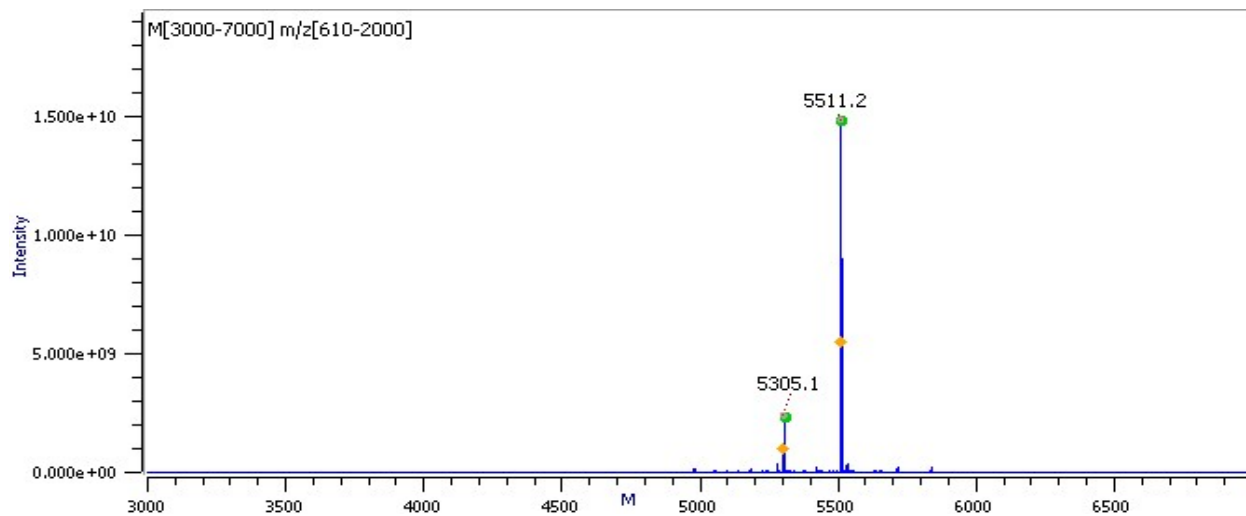

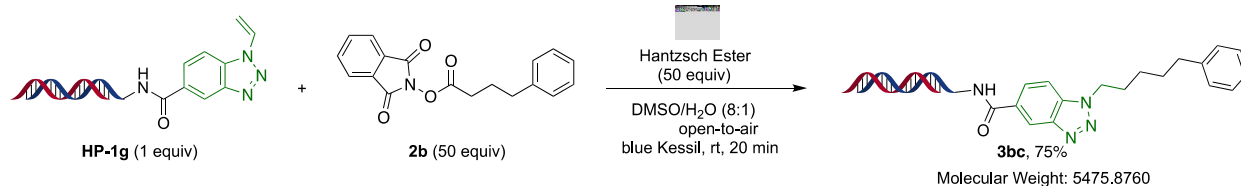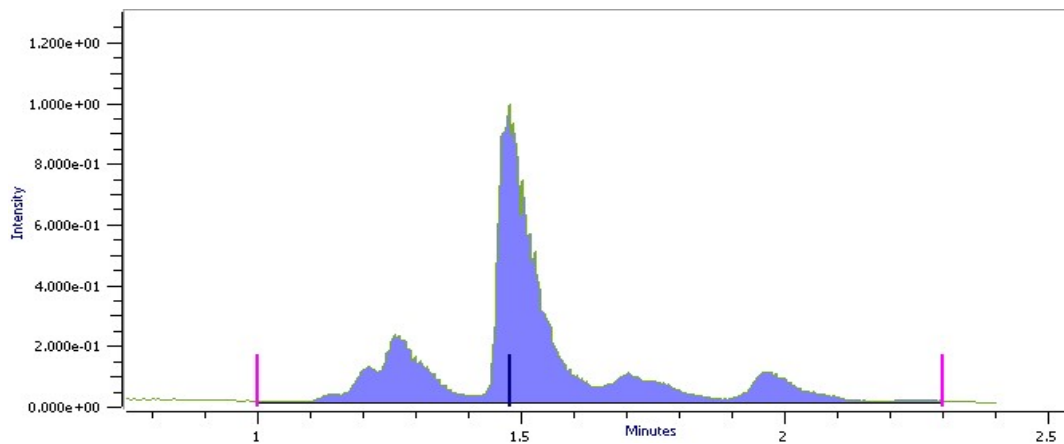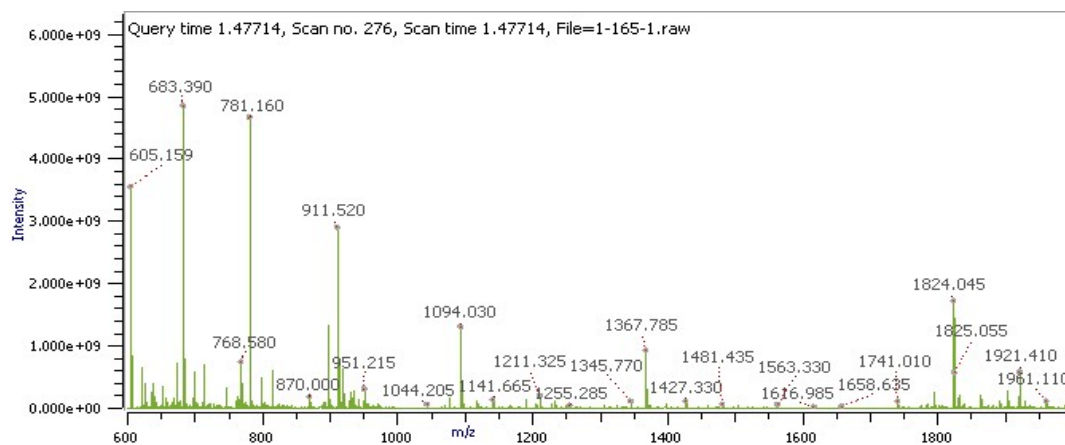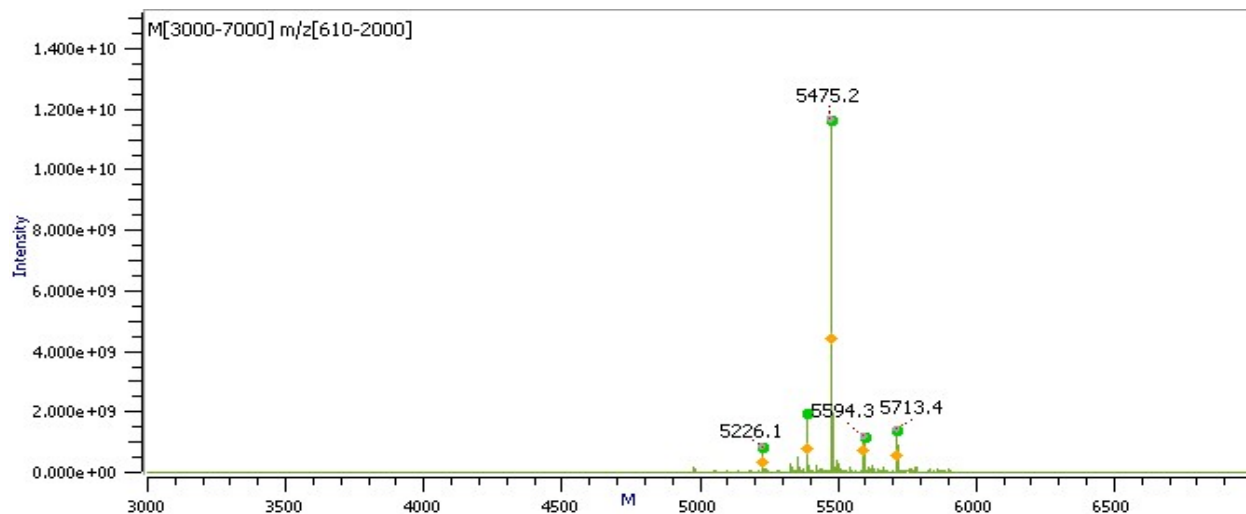

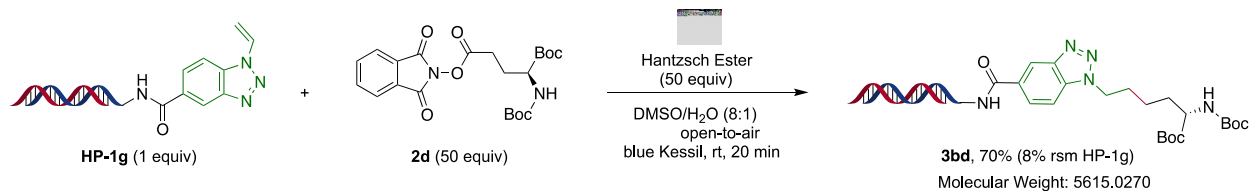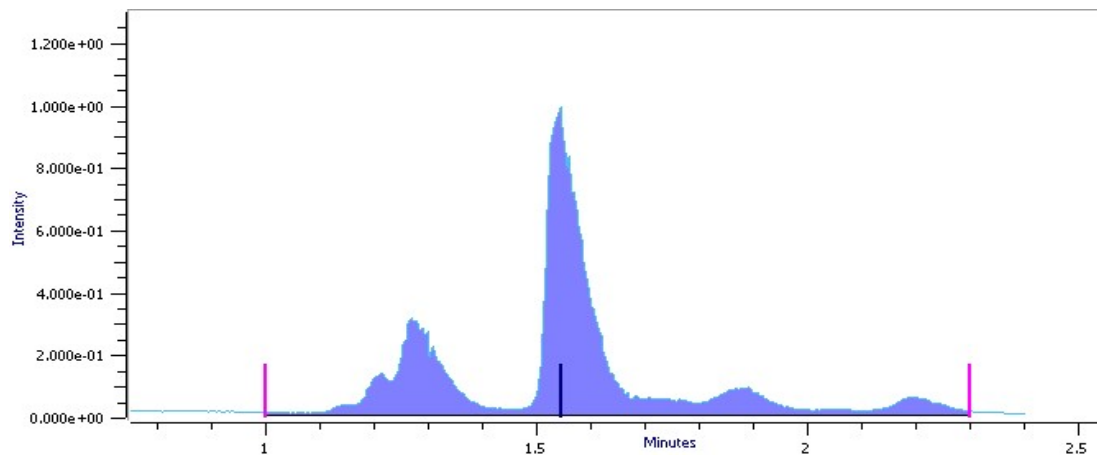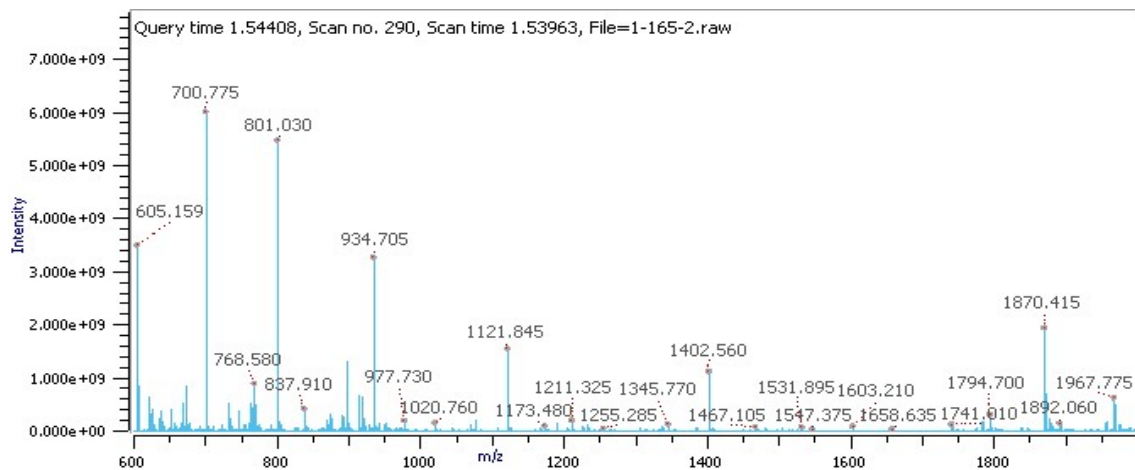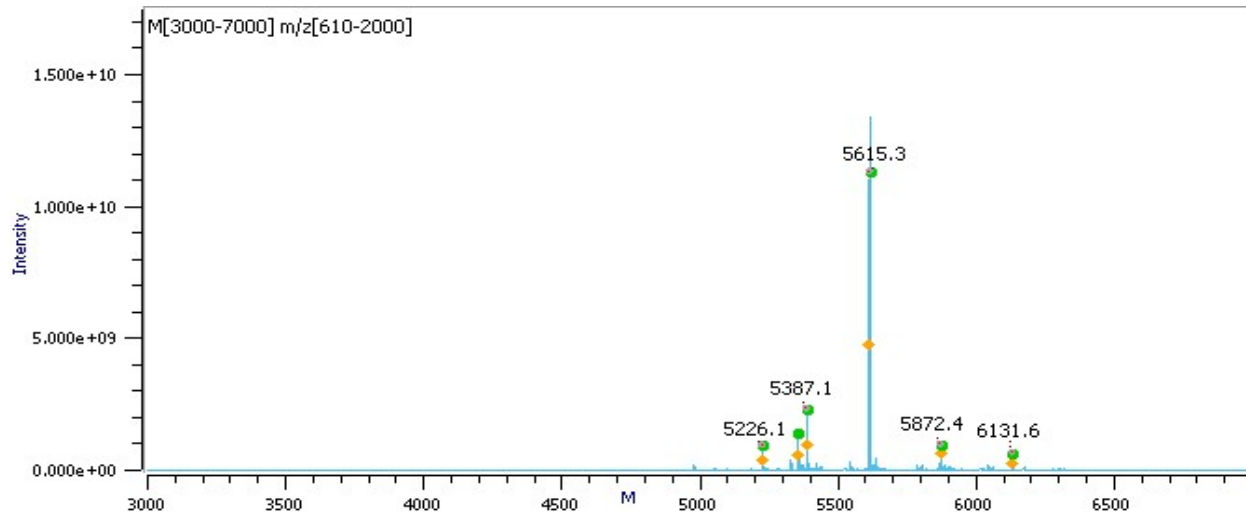



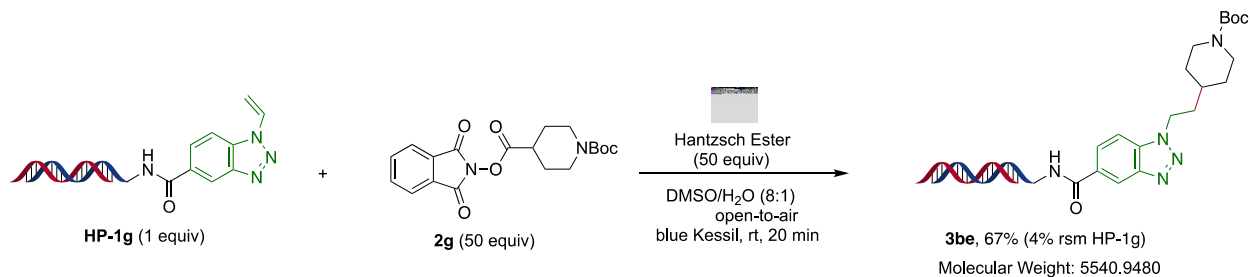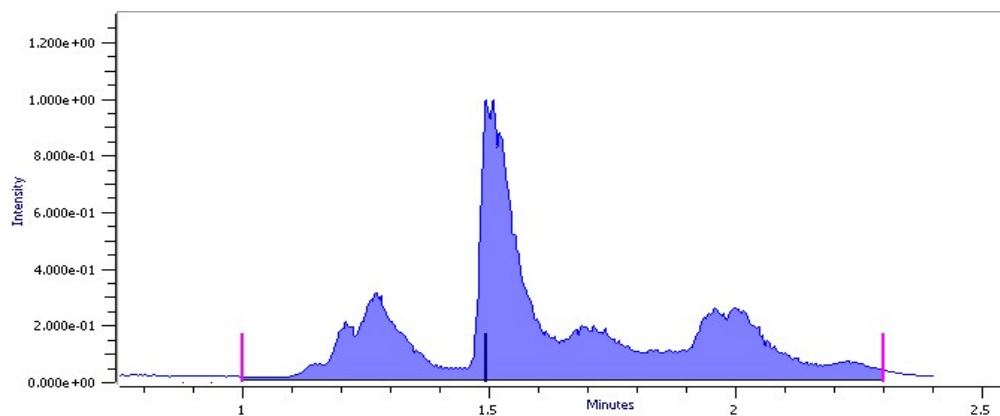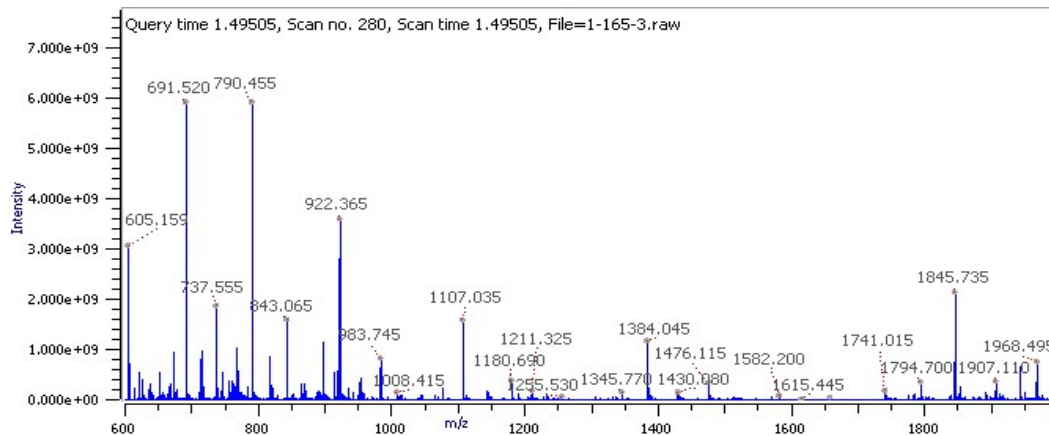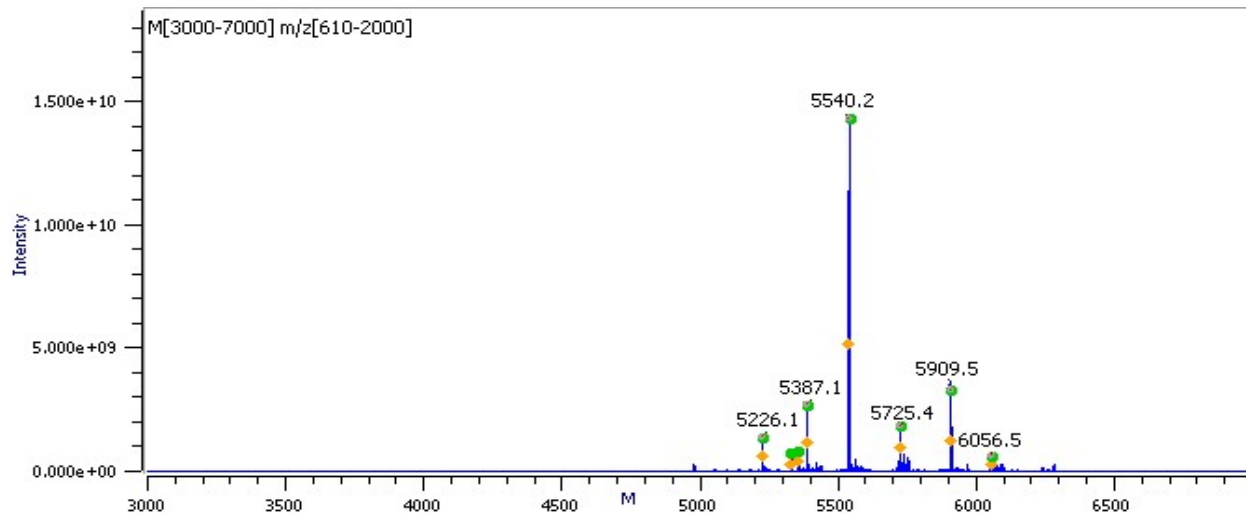

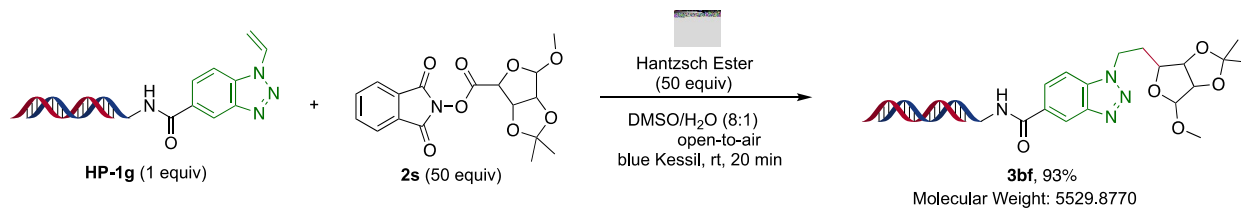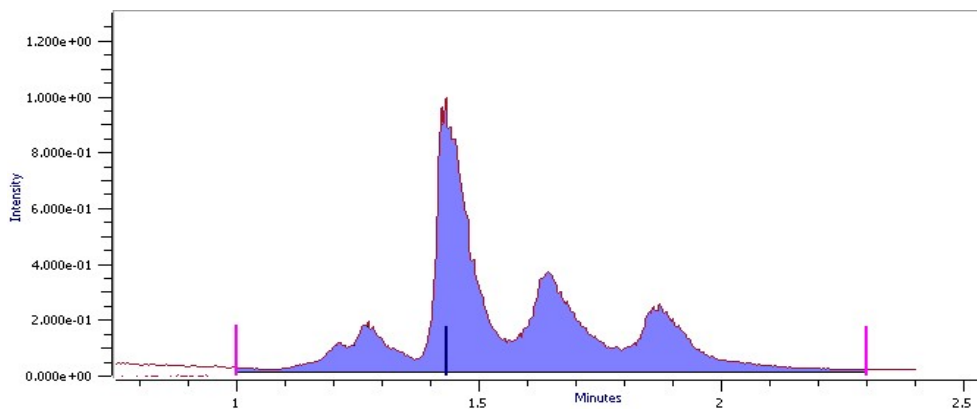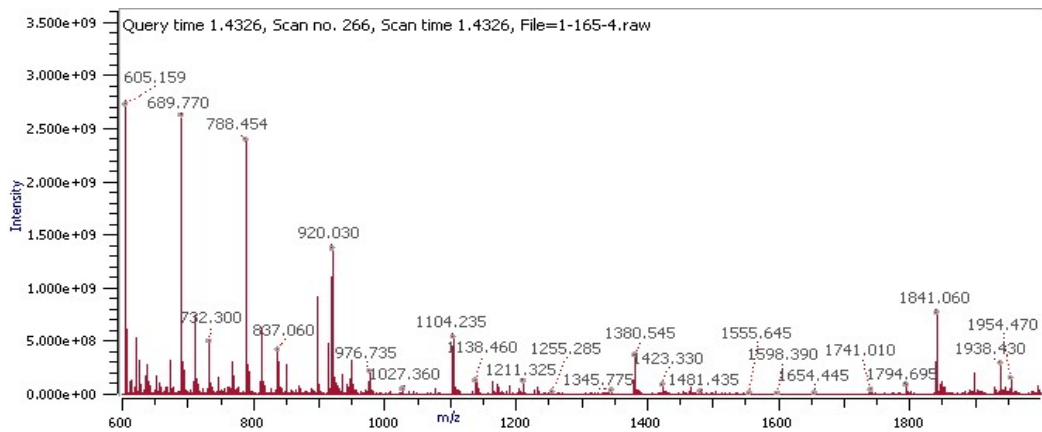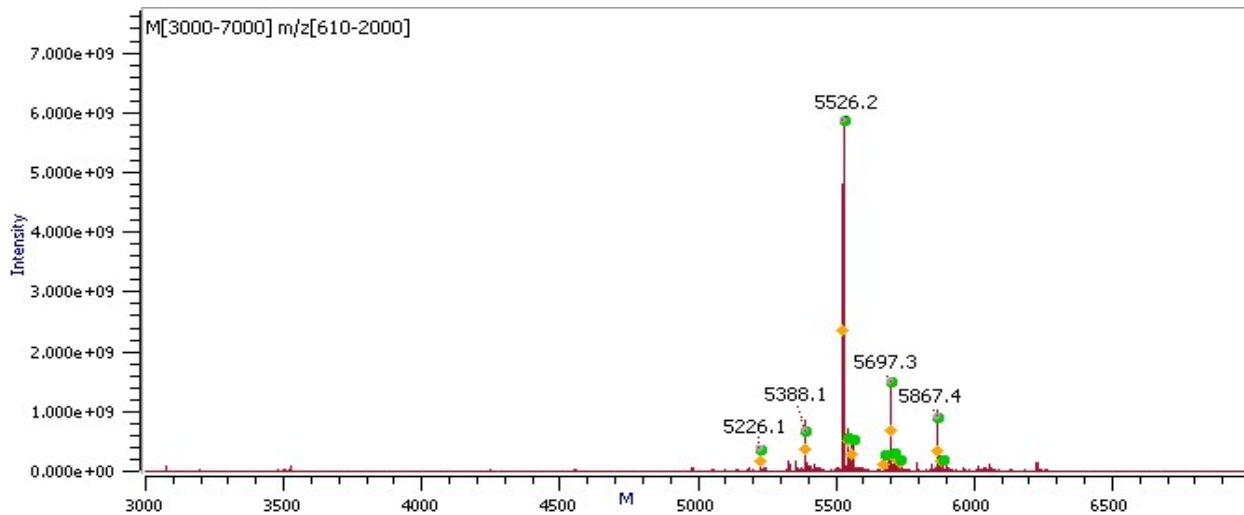

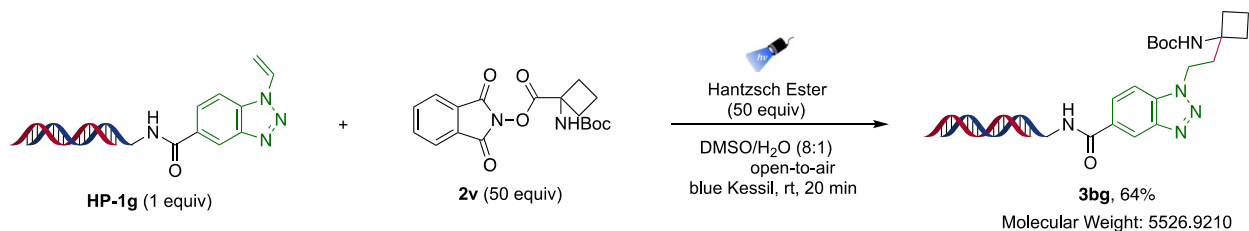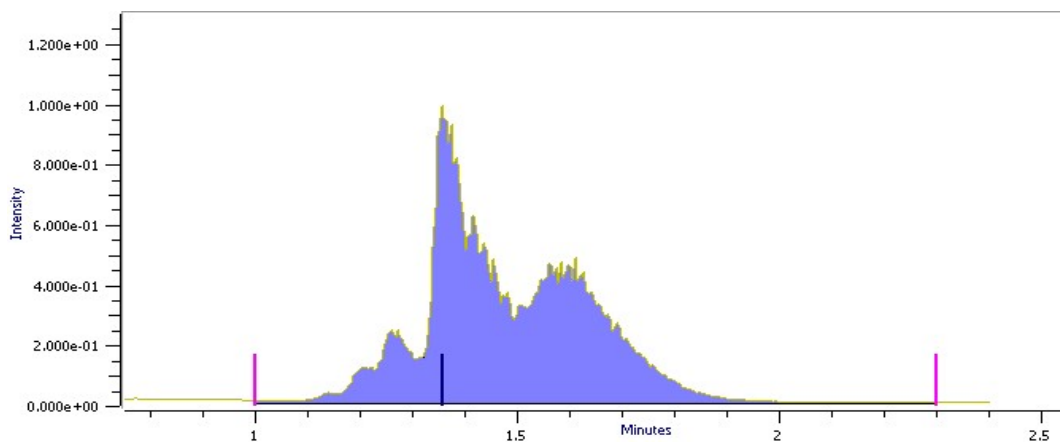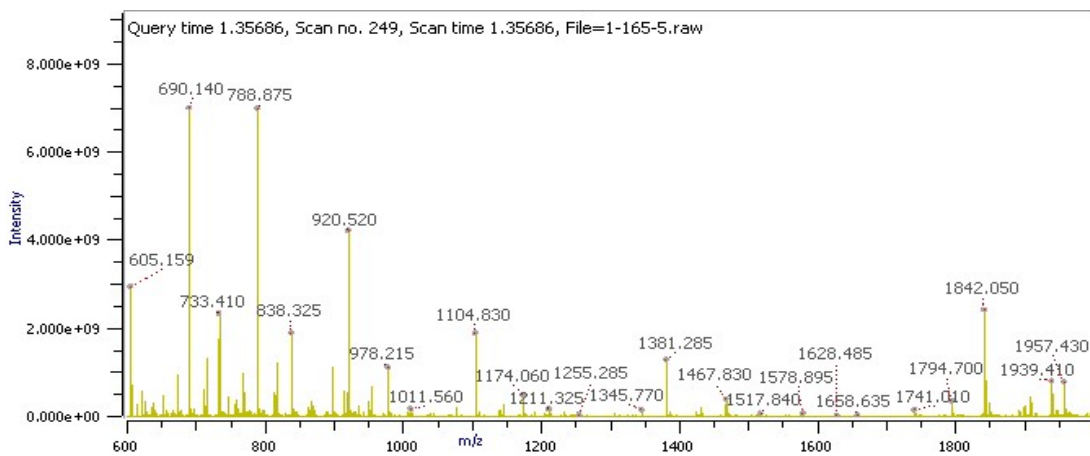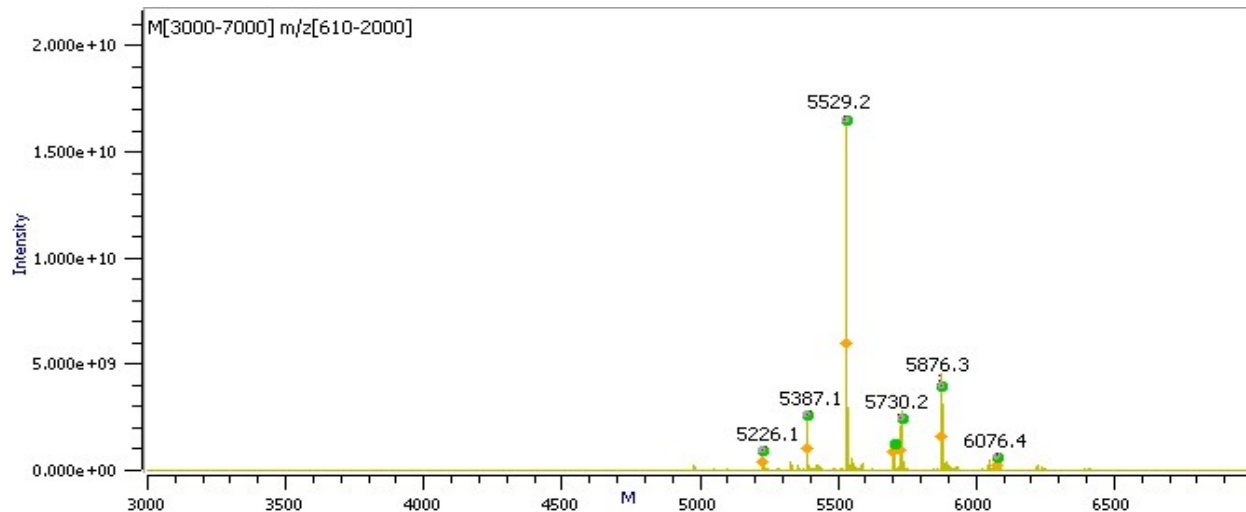

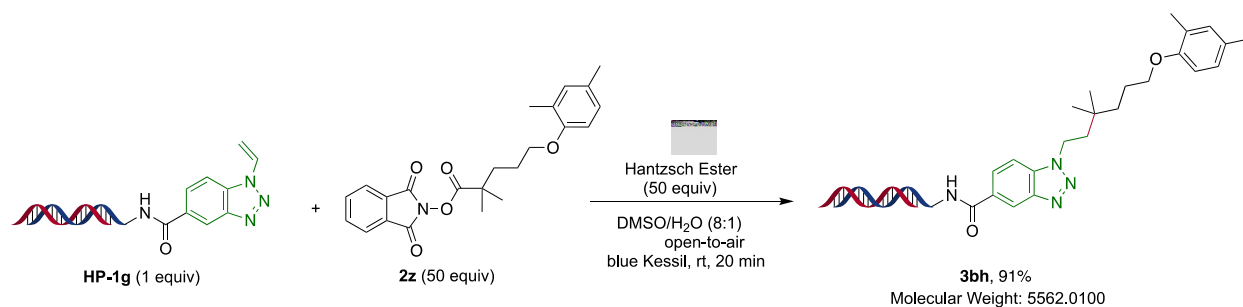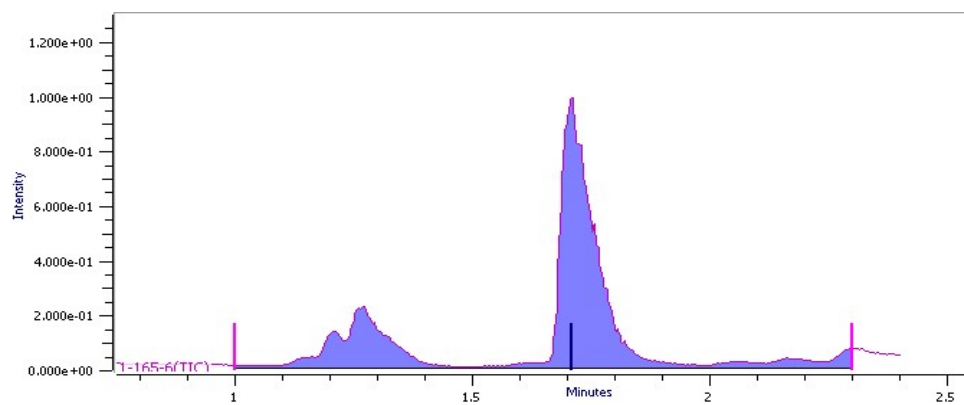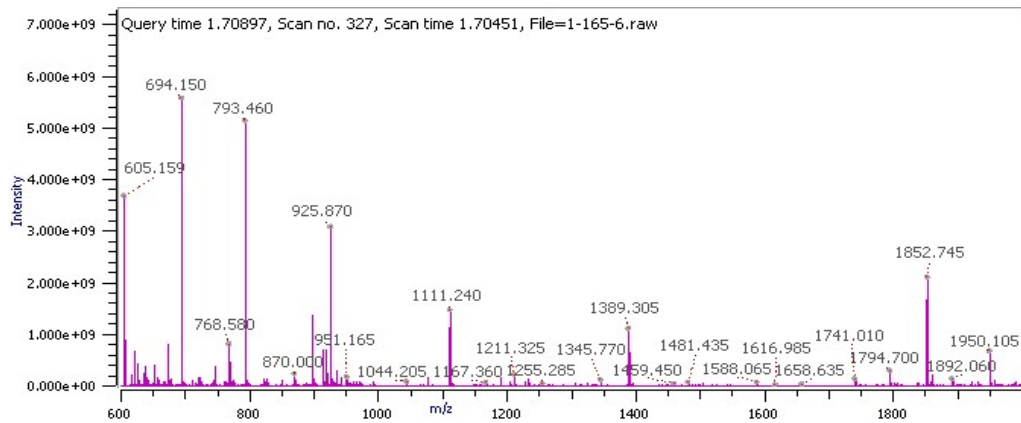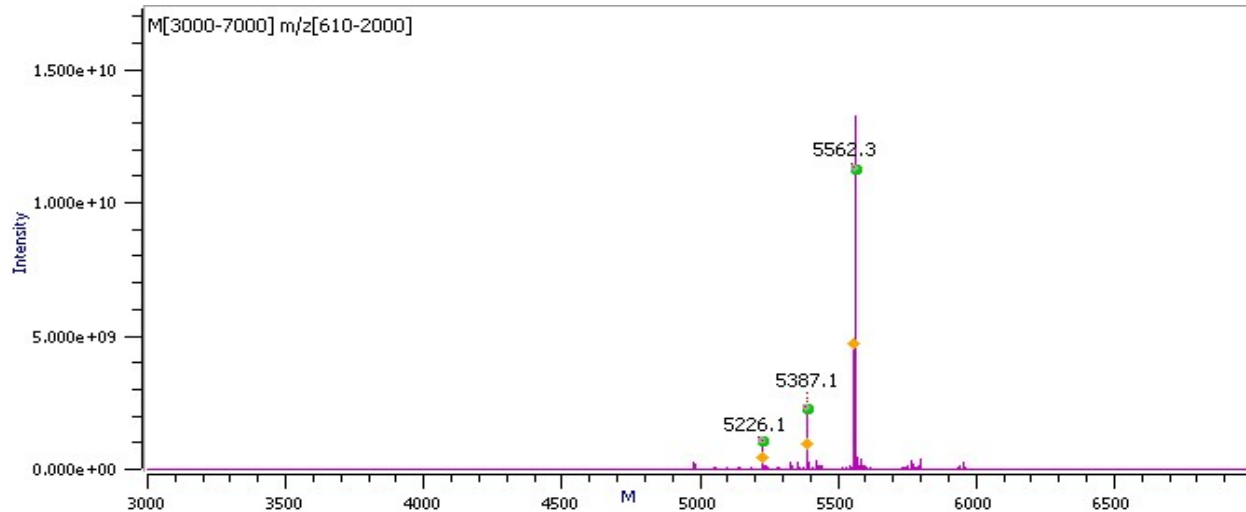

## 8 References

Phelan, J. P.; Lang, S. B.; Sim, J.; Berrit, S.; Peat, A. J.; Billings, K.; Molander, G. A. *J. Am. Chem. Soc.* **2019**, *141*, 3723-3732.

<sup>2</sup> Juliá, F.; Yan, J.; Paulus, F.; Ritter, T. *J. Am. Chem. Soc.* **2021**, *143*, 12992-12998.

<sup>3</sup> Pieroni, M.; Azzali, E.; Basilico, N.; Parapini, S.; Zolkiewski, M.; Beato, C.; Annunziato, G.; Bruno, A.; Vacondio, F.; Costantino, G. *J. Med. Chem.* **2017**, *60*, 1959-1970.
